# Supplementary material
Source: Research Square preprint supplement (doi:10.21203/rs.3.rs-9105785/v1)

# Supplementary Information

## Regio- and Diastereoselective Annulation of $\alpha,\beta$ -Unsaturated Aldimines with 1,3-Dienes by Rare-Earth-Catalyzed Allylic C(sp<sup>3</sup>)-H Activation

Tenggang Jiao,<sup>[a],[b],†</sup> Shuya Wang,<sup>[a],†</sup> Yumei Liang,<sup>[a]</sup> Jinwei Zhang,<sup>[a]</sup> Jingxia Wang,<sup>[a]</sup>  
Zhaomin Hou\*<sup>[c]</sup> Na Hao\*<sup>[b]</sup> and Xuefeng Cong\*<sup>[a],[d]</sup>

<sup>[a]</sup>Institute of Molecular Plus, Tianjin University, Tianjin 300072, China

<sup>[b]</sup>Green Pharmaceutical Technology Key Laboratory of Luzhou City, Central Nervous System Drug Key Laboratory of Sichuan Province, School of Pharmacy, Southwest Medical University, Luzhou 646000, China

<sup>[c]</sup>Organometallic Chemistry Laboratory, RIKEN Cluster for Pioneering Research; Advanced Catalysis Research Group, RIKEN Center for Sustainable Resource Science, 2-1 Hirosawa, Wako, Saitama 351-0198, Japan

<sup>[d]</sup>State Key Laboratory of Elemento-Organic Chemistry, Nankai University, Tianjin 300071, China

<sup>[†]</sup>These authors contributed equally to this work.

### Table of Contents

|                                                                                                                                                                                   |    |
|-----------------------------------------------------------------------------------------------------------------------------------------------------------------------------------|----|
| 1. General and Materials.....                                                                                                                                                     | 2  |
| 2. Optimizing Reaction Parameters .....                                                                                                                                           | 2  |
| 3. The Preparation of Substrates.....                                                                                                                                             | 9  |
| 4. General Procedure for the Diastereoselective [3 + 2] Annulation of $\alpha,\beta$ -Unsaturated Aldimines with 1,3-Dienes via $\beta'$ -Allylic C-H Activation.....             | 12 |
| 5. General Procedure for the <i>cis</i> -Diastereoselective [4 + 2] Annulation of $\alpha,\beta$ -Unsaturated Aldimines with 1,3-Dienes via $\gamma$ -Allylic C-H Activation..... | 39 |
| 6. Gram-Scale Reactions .....                                                                                                                                                     | 56 |
| 7. Transformations of <i>trans</i> -3aa, <i>trans</i> -3va and <i>cis</i> -3aac.....                                                                                              | 63 |
| 8. Mechanistic Investigation.....                                                                                                                                                 | 67 |
| 9. X-ray Crystallographic Studies .....                                                                                                                                           | 69 |
| 10. Copies of <sup>1</sup> H, and <sup>13</sup> C NMR Spectra.....                                                                                                                | 77 |

## 1. General and Materials

**General.** All manipulations of air- and moisture-sensitive compounds were performed under dry nitrogen atmosphere in a glovebox. The nitrogen in the glovebox was constantly circulated through a copper/molecular sieves catalyst unit. The oxygen and moisture concentrations in the glovebox atmosphere were monitored by an O<sub>2</sub>/H<sub>2</sub>O CombiAnalyzer to ensure both were always below 0.1 ppm. Analytical thin-layer chromatography was performed on glass plates coated with 0.25 mm 230–400 mesh silica gel containing a fluorescent indicator (Merck). Flash silica gel column chromatography was performed on silica gel 60N (spherical and neutral, 140–325 mesh) as described by Still. All <sup>1</sup>H and <sup>13</sup>C NMR spectra of organic products were recorded on Bruker AVANCE III HD 400 NMR, JEOL JNM-ECS400 or JEOL JNM-ECS600 instrument. <sup>1</sup>H NMR spectra were recorded at 400 or 600 MHz in CDCl<sub>3</sub> were referenced internally to tetramethylsilane as a standard, and <sup>13</sup>C NMR spectra were recorded at 100 or 126 MHz and referenced to the solvent resonance. The data are reported as follows: chemical shift (δ ppm), multiplicity (s = singlet, d = doublet, t = triplet, q = quartet, m = multiplet, dd = doublet of doublets, dt = doublet of triplets, brs = broad singlet, coupling constant(s) in Hz, integration). High Resolution Mass Spectra were obtained on a Bruker microTOF-Q III (Ion source: EI, APCI, or FD).

**Materials.** Unless otherwise noted, materials were purchased from Tokyo Chemical Industry Co., Aldrich Inc., Alfa Aesar, Adamas and other commercial suppliers and used as received. Solvents (THF, toluene and benzene) (dehydrated, stabilizer-free) were obtained from J&K Scientific, dried over sodium (for ANHYDROUS THF) by refluxing for overnight and freshly distilled, and dried over fresh Na chips in a glovebox. Butadiene is commercial and used as received. Isoprene, myrcene and 1,3-cyclohexadiene are commercial and were distilled from CaH<sub>2</sub> before use. [Ph<sub>3</sub>C][B(C<sub>6</sub>F<sub>5</sub>)<sub>4</sub>] was purchased from Strem and used without purification. All rare earth catalysts were synthesized according to literature.<sup>1</sup>

## 2. Optimizing Reaction Parameters

**Table S1. Evaluation of effect of *catalysts* for *trans*-diastereoselective [3 + 2] annulation of  $\alpha,\beta$ -unsaturated aldimine **1a** with (*E*)-1-phenyl-1,3-butadiene **2a** via  $\beta'$ -allylic C–H activation<sup>a</sup>**

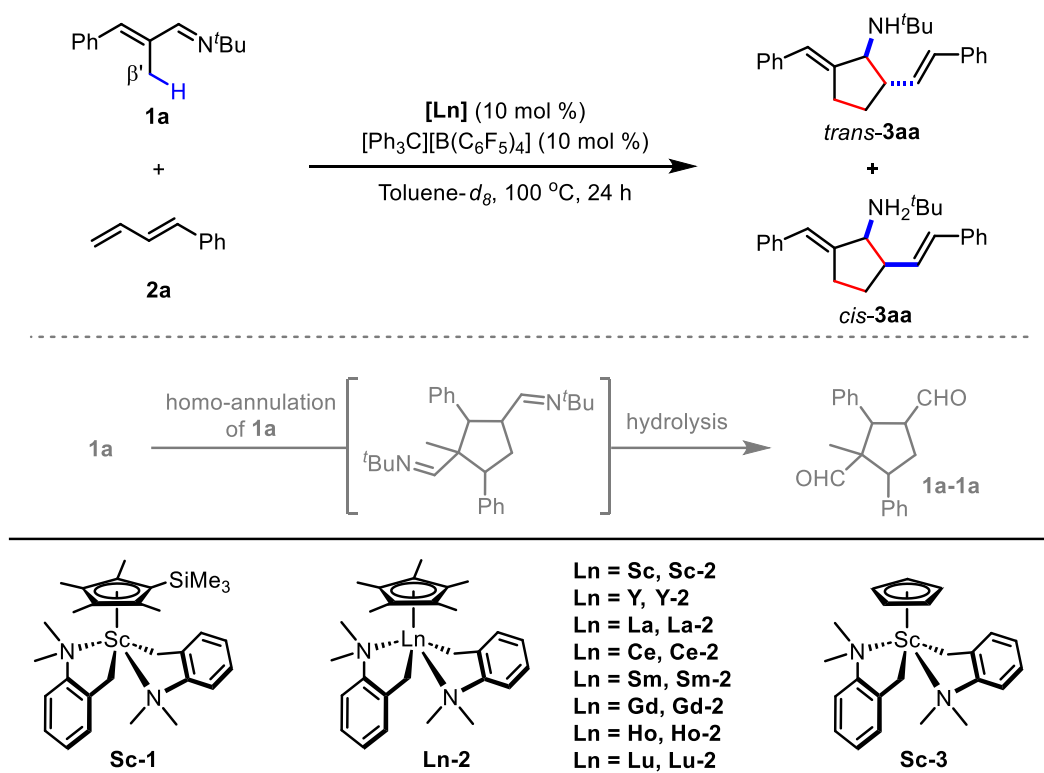

| Entry | [Ln]        | Yield of <b>3aa</b> <sup>b</sup> | d.r. ( <i>trans-3aa/cis-3aa</i> ) <sup>c</sup> | Yield of <b>1a-1a</b> <sup>d</sup> |
|-------|-------------|----------------------------------|------------------------------------------------|------------------------------------|
| 1     | <b>Sc-1</b> | 76%                              | >19:1                                          | trace                              |
| 2     | <b>Sc-2</b> | 74%                              | >19:1                                          | trace                              |
| 3     | <b>Sc-3</b> | 10%                              | >19:1                                          | 60%                                |
| 4     | <b>Y-2</b>  | 44%                              | >19:1                                          | 42%                                |
| 5     | <b>La-2</b> | n.d.                             | -                                              | 85%                                |
| 6     | <b>Ce-2</b> | n.d.                             | -                                              | 85%                                |
| 7     | <b>Sm-2</b> | n.d.                             | -                                              | 85%                                |
| 8     | <b>Gd-2</b> | n.d.                             | -                                              | 78%                                |
| 9     | <b>Ho-2</b> | n.d.                             | -                                              | 80%                                |
| 10    | <b>Lu-2</b> | n.d.                             | -                                              | 52%                                |

<sup>a</sup>Reaction conditions unless otherwise noted: **1a** (0.1 mmol), **2a** (0.30 mmol), [**Ln**] (10 mol%), [ $\text{Ph}_3\text{C}$ ][ $\text{B}(\text{C}_6\text{F}_5)_4$ ] (10 mol%), toluene- $d_8$  (1 mL), 100 °C, 24 h. <sup>b</sup>Combined NMR yield of both diastereomers. <sup>c</sup>Determined by  $^1\text{H}$  NMR analysis. <sup>d</sup>Combined NMR yield of all diastereomers of **1a-1a**.

**Table S2. Investigation of the effect of additives for *trans*-diastereoselective [3 + 2] annulation of  $\alpha,\beta$ -unsaturated aldimine **1a** with **2a** via  $\beta'$ -allylic C–H activation by **Sc-1**<sup>a</sup>**

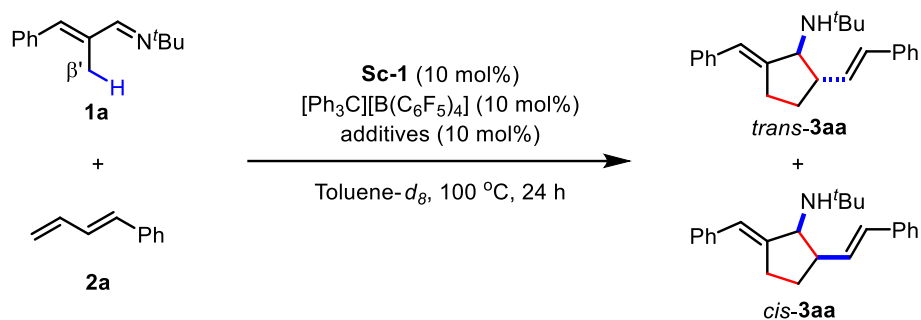

| Entry | Additives                            | Yield of <i>trans</i> - <b>3aa</b> <sup>b</sup> | d.r.<br>( <i>trans</i> - <b>3aa</b> / <i>cis</i> - <b>3aa</b> ) |
|-------|--------------------------------------|-------------------------------------------------|-----------------------------------------------------------------|
| 1     | AdNH <sub>2</sub>                    | 98%                                             | > 19:1                                                          |
| 1     | CyNH <sub>2</sub>                    | 85%                                             | > 19:1                                                          |
| 2     | Bn <sub>2</sub> NH                   | 85%                                             | > 19:1                                                          |
| 3     | Cy <sub>2</sub> NH                   | 90%                                             | > 19:1                                                          |
| 4     | (Me <sub>3</sub> Si) <sub>2</sub> NH | 78%                                             | > 19:1                                                          |
| 5     | <i>n</i> Bu <sub>2</sub> NH          | 80%                                             | > 19:1                                                          |
| 6     | -                                    | 76%                                             | > 19:1                                                          |

<sup>a</sup>Reaction conditions unless otherwise noted: **1a** (0.1 mmol), **2a** (0.30 mmol), **Sc-1** (10 mol%),  $[\text{Ph}_3\text{C}][\text{B}(\text{C}_6\text{F}_5)_4]$  (10 mol%), additives (10 mol%), toluene- $d_8$  (1 mL), 100 °C, 24 h. <sup>b</sup>Combined NMR yield of both diastereomers.

**Table S3. Investigation of the effect of loading of catalyst and reaction temperature for *trans*-diastereoselective [3 + 2] annulation of  $\alpha,\beta$ -unsaturated aldimine **1a** with **2a** via  $\beta'$ -allylic C–H activation<sup>a</sup>**

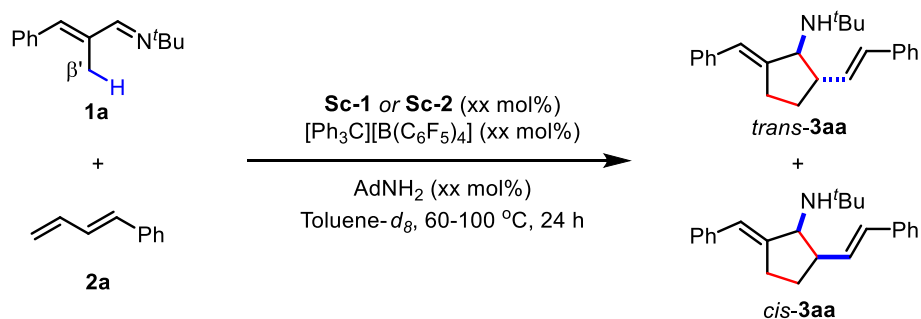

| Entry | [Ln]                  | Temp (°C) | Yield of <b>3aa</b> <sup>b</sup> | <i>trans</i> : <i>cis</i> <sup>c</sup> |
|-------|-----------------------|-----------|----------------------------------|----------------------------------------|
| 1     | <b>Sc-1</b> (10 mol%) | 100       | 98%                              | > 19 : 1                               |

|   |                       |     |              |          |
|---|-----------------------|-----|--------------|----------|
| 2 | <b>Sc-1</b> (10 mol%) | 80  | 45%          | > 19 : 1 |
| 3 | <b>Sc-1</b> (10 mol%) | 60  | <i>trace</i> | -        |
| 4 | <b>Sc-1</b> (8 mol%)  | 100 | 90%          | > 19 : 1 |
| 5 | <b>Sc-1</b> (5 mol%)  | 100 | 50%          | > 19 : 1 |
| 6 | <b>Sc-2</b> (10 mol%) | 100 | 94%          | > 19 : 1 |
| 7 | <b>Sc-2</b> (8 mol%)  | 100 | 90%          | > 19 : 1 |

<sup>a</sup>Reaction conditions unless otherwise noted: **1a** (0.1 mmol), **2a** (0.30 mmol), [**Ln**] (xx mol%), [Ph<sub>3</sub>C][B(C<sub>6</sub>F<sub>5</sub>)<sub>4</sub>] (xx mol%), AdNH<sub>2</sub> (xx mol %), toluene-*d*<sub>8</sub> (1 mL), 60-100 °C, 24 h. <sup>b</sup>Combined NMR yield of both diastereomers. <sup>c</sup>Determined by <sup>1</sup>H NMR analysis.

**Table S4. Investigation of the effect of loading of 2a for trans-diastereoselective [3 + 2] annulation of  $\alpha,\beta$ -unsaturated aldimine 1a with 2a via  $\beta'$ -allylic C–H activation by Sc-1<sup>a</sup>**

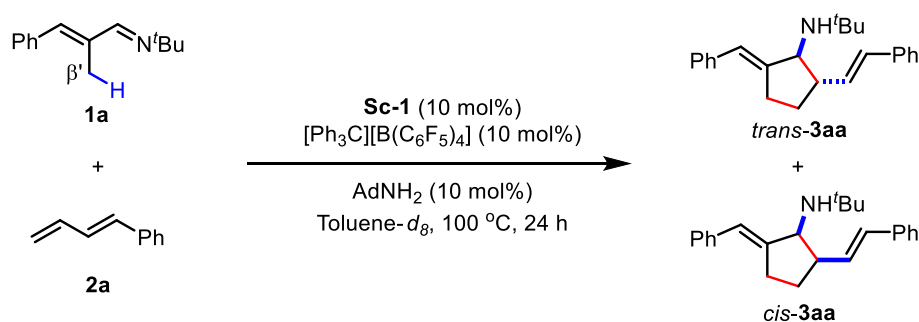

| Entry | <b>Sc-1</b>           | <b>2a</b> (equiv.) | Yield of <b>3aa</b> <sup>b</sup> | <i>trans</i> : <i>cis</i> <sup>c</sup> |
|-------|-----------------------|--------------------|----------------------------------|----------------------------------------|
| 1     | <b>Sc-1</b> (10 mol%) | 4.0                | 98%                              | > 19 : 1                               |
| 2     | <b>Sc-1</b> (10 mol%) | 3.0                | 98%                              | > 19 : 1                               |
| 3     | <b>Sc-1</b> (10 mol%) | 2.0                | 75%                              | > 19 : 1                               |
| 4     | <b>Sc-1</b> (10 mol%) | 1.5                | 60%                              | > 19 : 1                               |
| 5     | <b>Sc-1</b> (10 mol%) | 1.0                | 50%                              | > 19 : 1                               |

<sup>a</sup>Reaction conditions unless otherwise noted: **1a** (0.1 mmol), **2a** (0.10-0.40 mmol), **Sc-1** (10 mol%), [Ph<sub>3</sub>C][B(C<sub>6</sub>F<sub>5</sub>)<sub>4</sub>] (10 mol%), AdNH<sub>2</sub> (10 mol%), toluene-*d*<sub>8</sub> (1 mL),

100 °C, 24 h. <sup>b</sup>Combined NMR yield of both diastereomers. <sup>c</sup>Determined by <sup>1</sup>H NMR analysis.

**Table S5. Evaluation of effect of catalysts for *cis*-diastereoselective [4 + 2] annulation of  $\alpha,\beta$ -unsaturated aldimine **4a** with **2a** via  $\gamma$ -allylic C–H activation<sup>a</sup>**

---

**Sc-1**

**Ln-2**

Ln = Sc, Sc-2  
 Ln = Y, Y-2  
 Ln = La, La-2  
 Ln = Ce, Ce-2  
 Ln = Sm, Sm-2  
 Ln = Gd, Gd-2  
 Ln = Ho, Ho-2  
 Ln = Lu, Lu-2

**Sc-3**

| Entry | [Ln]        | Yield of <b>5aa</b> <sup>b</sup> | d.r. ( <i>trans</i> - <b>5aa</b> / <i>cis</i> - <b>5aa</b> ) <sup>c</sup> | Yield of ( <b>4a-4a</b> + <b>4a'-4a'</b> ) <sup>d</sup> |
|-------|-------------|----------------------------------|---------------------------------------------------------------------------|---------------------------------------------------------|
| 1     | <b>Sc-1</b> | n.d.                             | -                                                                         | 50%                                                     |
| 2     | <b>Sc-2</b> | n.d.                             | -                                                                         | 60%                                                     |
| 3     | <b>Sc-3</b> | n.d.                             | -                                                                         | 80%                                                     |
| 4     | <b>Y-2</b>  | n.d.                             | -                                                                         | 74%                                                     |
| 5     | <b>La-2</b> | n.d.                             | -                                                                         | 50%                                                     |
| 6     | <b>Ce-2</b> | ≈ 5%                             | < 1:19                                                                    | 66%                                                     |
| 7     | <b>Sm-2</b> | trace                            | -                                                                         | 80%                                                     |
| 8     | <b>Gd-2</b> | n.d.                             | -                                                                         | 75%                                                     |
| 9     | <b>Ho-2</b> | n.d.                             | -                                                                         | 79%                                                     |
| 10    | <b>Lu-2</b> | n.d.                             | -                                                                         | 60%                                                     |

<sup>a</sup>Reaction conditions unless otherwise noted: **4a** (0.1 mmol), **2a** (0.30 mmol), [**Ln**] (10 mol%), [**Ph<sub>3</sub>C**][**B(C<sub>6</sub>F<sub>5</sub>)<sub>4</sub>**] (10 mol%), toluene-*d*<sub>8</sub> (1 mL), 70 °C, 12 h. <sup>b</sup>Combined NMR yield of both diastereomers. <sup>c</sup>Determined by <sup>1</sup>H NMR analysis. <sup>d</sup>Combined NMR yield of **4a-4a** and **4a'-4a'**.

**Table S6. Investigation of the effect of *additives* for *cis*-diastereoselective [4 + 2] annulation of  $\alpha,\beta$ -unsaturated aldimine **4a** with **2a** via  $\gamma$ -allylic C–H activation by Ce-2<sup>a</sup>**

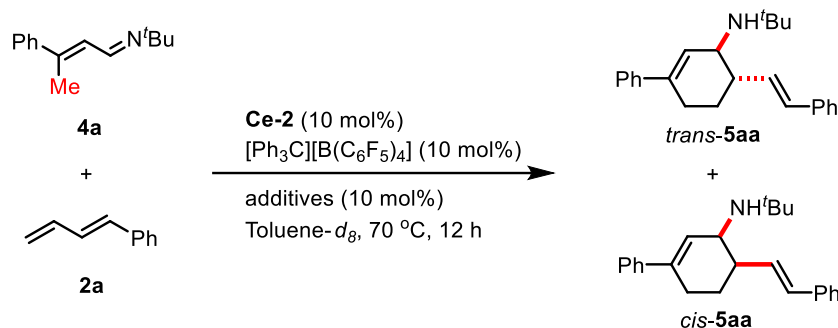

| Entry | Additives                            | Yield of <i>cis</i> -5aa <sup>b</sup> | <i>trans</i> : <i>cis</i> <sup>c</sup> |
|-------|--------------------------------------|---------------------------------------|----------------------------------------|
| 1     | AdNH <sub>2</sub>                    | n.d.                                  | -                                      |
| 2     | <b>Bn</b> <sub>2</sub> NH            | ≈ 15%                                 | < 1 : 19                               |
| 3     | Cy <sub>2</sub> NH                   | trace                                 | -                                      |
| 4     | (Me <sub>3</sub> Si) <sub>2</sub> NH | trace                                 | -                                      |
| 5     | <sup>n</sup> Bu <sub>2</sub> NH      | trace                                 | -                                      |
| 6     | CyNH <sub>2</sub>                    | n.d.                                  | -                                      |

<sup>a</sup>Reaction conditions unless otherwise noted: **4a** (0.1 mmol), **2a** (0.30 mmol), Ce-2 (10 mol%), [Ph<sub>3</sub>C][B(C<sub>6</sub>F<sub>5</sub>)<sub>4</sub>] (10 mol%), additives (10 mol%), toluene-*d*<sub>8</sub> (1 mL), 70 °C, 12 h. <sup>b</sup>Combined NMR yield of both diastereomers.

**Table S7. Investigation of the effect of substituents on 1,3-dienes for *cis*-diastereoselective [4 + 2] annulation of  $\alpha,\beta$ -unsaturated aldimine **4a** via  $\gamma$ -allylic C–H activation by Ce-2**

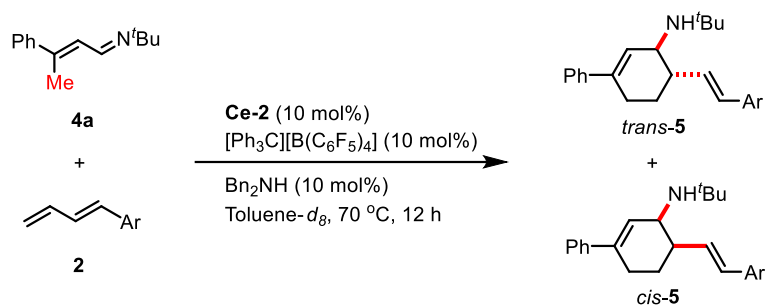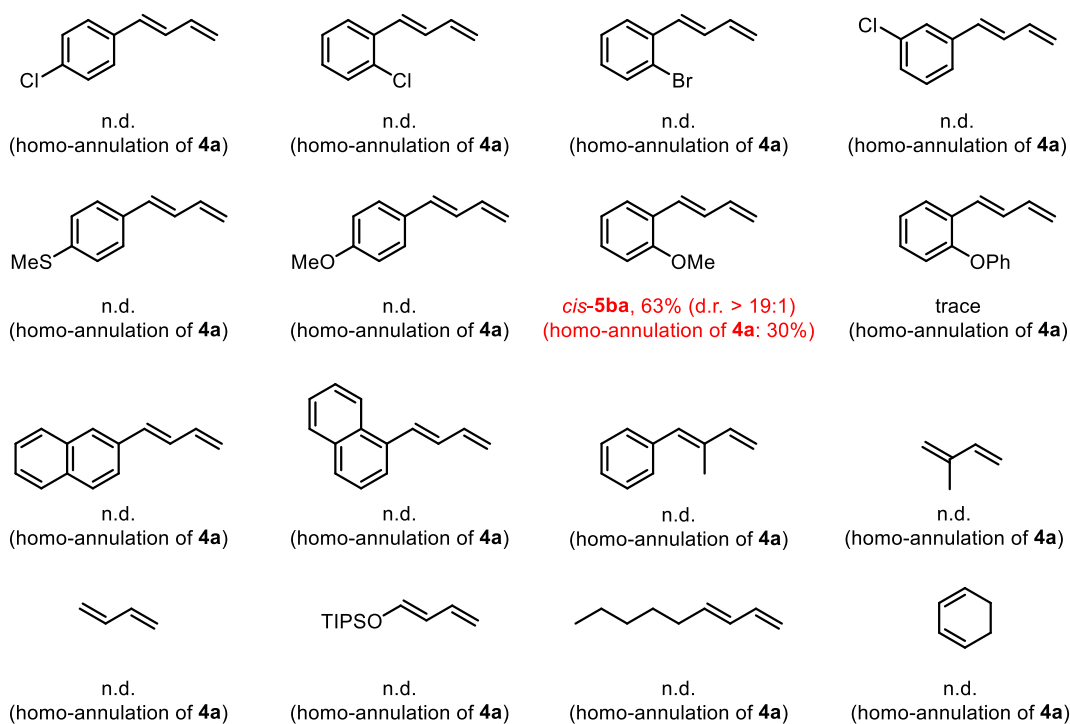

<sup>a</sup>Reaction conditions unless otherwise noted: **4a** (0.1 mmol), **2** (0.30 mmol), **Ce-2** (10 mol%), [Ph<sub>3</sub>C][B(C<sub>6</sub>F<sub>5</sub>)<sub>4</sub>] (10 mol%), Bn<sub>2</sub>NH (10 mol%), toluene-*d*<sub>8</sub> (1 mL), 70 °C, 12 h.

**Table S8. Ineffective aldimine substrates for *trans*-diastereoselective [3 + 2] annulation with **2a** via β'-allylic C–H activation by Sc-1**

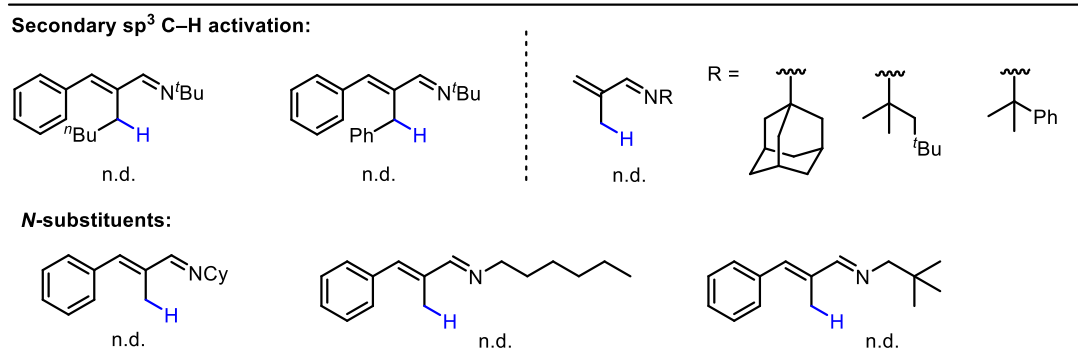

### 3. The Preparation of Substrates

#### Synthesis of the corresponding 1,3-dienes

1-Aryl- and -alkyl-substituted 1,3-dienes<sup>2</sup> buta-1,3-dien-2-ylcyclopentane<sup>3</sup> and  $\alpha,\beta$ -unsaturated aldimines<sup>4</sup> were prepared following literature method.

#### General procedure for the synthesis of the $\alpha$ -methyl $\alpha,\beta$ -unsaturated aldehydes

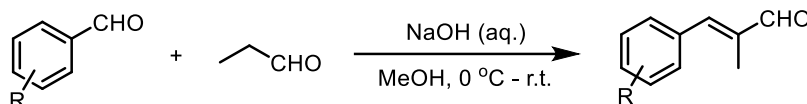

According to a reported procedure,<sup>5</sup> an aqueous sodium hydroxide solution (10 wt%, 6 mL) is added dropwise to a solution of the aromatic aldehyde (10 mmol, 1.0 equiv) in MeOH (20 mL) at 0 °C. A solution of the aliphatic aldehyde (15 mmol, 1.5 equiv) in MeOH (5 mL) is slowly added dropwise. The resulting reaction mixture is stirred for the 3 h at room temperature. Aqueous hydrochloric acid (1 M, 8 mL) is added to the reaction mixture and the phases are separated. The aqueous phase is extracted with EtOAc (3 × 25 mL), and the combined organic phases are washed with brine (1 × 25 mL), dried over MgSO<sub>4</sub>, and concentrated under reduced pressure. Purification of the residue by flash chromatography on silica gel affords the  $\alpha,\beta$ -unsaturated aldehydes.

#### General procedure for synthesis of the tetra-substituted $\alpha$ -methyl $\alpha,\beta$ -unsaturated aldehydes

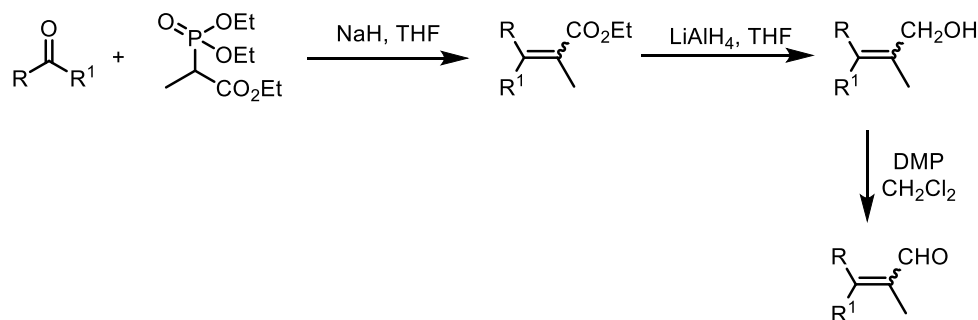

According to a reported procedure,<sup>6</sup> to a stirred suspension of NaH (1.96g, 50 mmol, 60 % mineral dispersion) in anhydrous THF (30 mL) at 0 °C was added triethyl 2-phosphonopropionate (1.20 g, 50 mmol) dropwise. The reaction mixture was then heated to 40 °C and stirred for 1 h. After cooling to 0 °C, the corresponding ketone (50 mmol) was added dropwise and the resulting mixture was stirred at 40 °C for further 12 h. After then, the reaction was quenched with water. The organic layer was collected, and the aqueous layer was extracted with EtOAc (2 × 25 mL). The

combined organic layers were dried over  $\text{MgSO}_4$ , filtered, and concentrated under reduced pressure. The crude product was subjected to flash chromatography (Hexane/EtOAc = 95/5) to afford the corresponding  $\alpha,\beta$ -unsaturated ester ((*E*)-isomers, (*Z*)-isomers or the mixture of (*E*)-isomers and (*Z*)-isomers).

To a solution of unsaturated ester (20 mmol) obtained above and anhydrous THF (30 mL) was carefully added  $\text{LiAlH}_4$  (1.52 g, 40 mmol) in a few portions at 0 °C. The reaction mixture was gradually warmed to room temperature and stirred for 12 h. The reaction mixture was then cooled to 0 °C and quenched with 1 M aqueous HCl. The organic layer was separated and the aqueous layer was extracted with  $\text{CH}_2\text{Cl}_2$  (2  $\times$  25 mL). The combined organics were dried over  $\text{MgSO}_4$ , filtered, and concentrated under reduced pressure. The crude product was subjected to flash chromatography (Hexane/EtOAc = 1/1) to afford the corresponding allylic alcohol.

To a 100 mL round bottom flask containing the allylic alcohol (10 mmol) obtained above, was added activated Dess-Martin Periodinane (11 mmol) and anhydrous  $\text{CH}_2\text{Cl}_2$  (40 mL) at 0 °C. The solution was stirred at this temperature for 2 h and judged to be complete by TLC. The reaction mixture washed sequentially with saturated  $\text{NaHCO}_3$  (aq.) solution,  $\text{H}_2\text{O}$ , and brine. The organic layer was separated and dried over anhydrous  $\text{MgSO}_4$ , filtered, and concentrated under reduced pressure. The crude residue was subjected to flash chromatography (Hexane/EA = 95/5).

### General procedure for the synthesis of the $\beta$ -alkyl $\alpha,\beta$ -unsaturated aldehydes

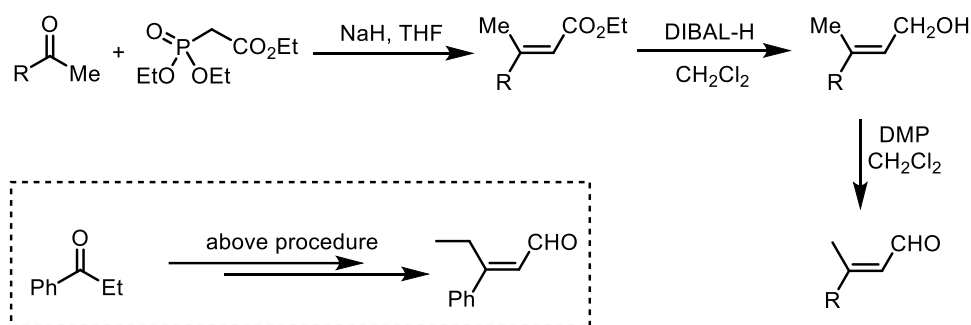

According to a reported procedure,<sup>7</sup> to a 200 mL round bottom flask containing  $\text{NaH}$  (20 mmol, 60% mineral dispersion) and anhydrous THF (80 mL) at 0 °C, was added triethyl phosphonoacetate (43 mmol) dropwise via an addition funnel. The reaction mixture was naturally warmed to rt, followed by a dropwise addition of an acetophenone solution (26 mmol, in 20 mL anhydrous THF). The reaction mixture was stirred for 12 h, and then poured into a separating funnel containing water. The organic layer was collected, and the aqueous layer was extracted with EtOAc (3  $\times$  50 mL). The combined organic layers were dried over  $\text{MgSO}_4$ , filtered, and concentrated

under reduced pressure. The crude residue was subjected to flash chromatography (Hexane/EA = 95/5) (75-90% yield).

A solution of unsaturated ester (10 mmol) in CH<sub>2</sub>Cl<sub>2</sub> (50 mL) was cooled to -78 °C then DIBAL-H (25 mmol, 1 M in toluene) was added via syringe. The solution was stirred at this temperature for 1 h and judged to be complete by TLC. After this time the reaction mixture was quenched at -78 °C by the dropwise addition of water (10 mL), then NaOH (aq.) was added (10 mL, 2 M), the mixture was allowed to reach 0 °C and then an additional 10 mL of water was added. The mixture was diluted with ether and MgSO<sub>4</sub> was added and the mixture was stirred for 15 min. The mixture was filtered and concentrated under reduced pressure. The product was purified by column chromatography (Hexane/EA = 15/1) (80-95% yield).

To a 100 mL round bottom flask containing the allylic alcohol (8 mmol) obtained above, was added activated Dess-Martin Periodinane (9 mmol) and anhydrous CH<sub>2</sub>Cl<sub>2</sub> (30 mL) at 0 °C. The solution was stirred at this temperature for 2 h and judged to be complete by TLC. The reaction mixture washed sequentially with saturated NaHCO<sub>3</sub> (aq.) solution, H<sub>2</sub>O, and brine. The organic layer was separated and dried over anhydrous MgSO<sub>4</sub>, filtered, and concentrated under reduced pressure. The crude residue was subjected to flash chromatography (Hexane/EA = 95/5) (85-95% yield).

### General procedure for the synthesis of the $\beta$ -alkyl $\alpha,\beta$ -unsaturated aldehydes

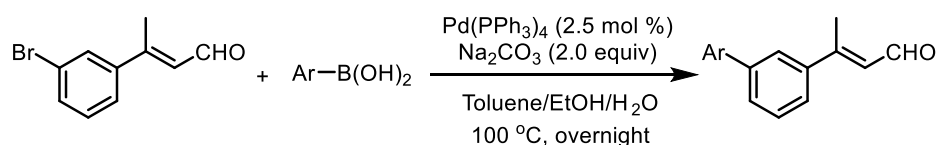

A mixture of Br-substituted  $\alpha,\beta$ -unsaturated aldehyde (5.0 mmol), arylboronic acid (7.5 mmol), Pd(PPh<sub>3</sub>)<sub>4</sub> (2.5 mol %), Na<sub>2</sub>CO<sub>3</sub> (10 mmol) and Toluene/EtOH/H<sub>2</sub>O (7.5/2.5/2.5 mL) was stirred at 100 °C for 12 hours. The mixture was added to brine and extracted with ethyl acetate (3 × 15 mL). The solvent was concentrated in vacuo and the product was purified by column chromatography on silica gel using hexane/ethyl acetate as eluent (80-90% yield).

### General procedure for the synthesis of *N*-alkyl-substituted $\alpha,\beta$ -unsaturated aldimines

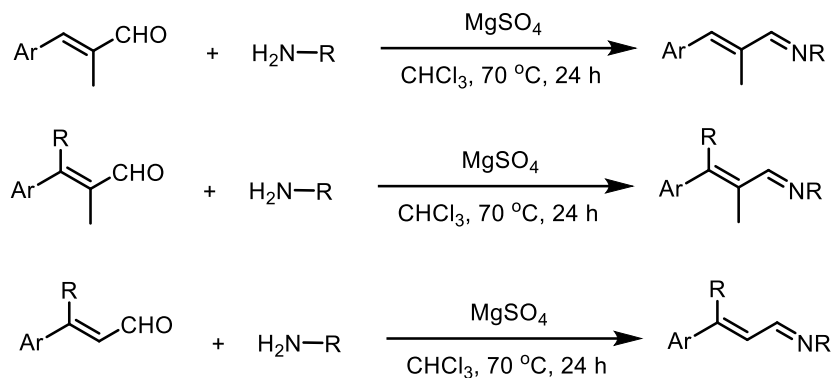

A 30 mL Schlenk tube with a stirring bar was charged with the  $\alpha,\beta$ -unsaturated aldehydes (5 or 10 mmol), *tert*-butyl amine (20 or 40 mmol) or primary alkyl amines (5 or 10 mmol), and anhydrous magnesium sulfate (2.0 g or 4.0 g) in  $\text{CHCl}_3$  (5 mL). The mixture was stirred at 70 °C for 24 h. After cooling to room temperature, the  $\text{MgSO}_4$  was then removed *via* filtration and the filtrate was evaporated under a reduced pressure. The corresponding imine product was generally obtained in very high purity and employed without further purification after checking by  $^1\text{H}$  NMR and  $^{13}\text{C}$  NMR or purified by distillation if necessary.

#### 4. General Procedure for the Diastereoselective [3 + 2] Annulation of $\alpha,\beta$ -Unsaturated Aldimines with 1,3-Dienes *via* $\beta'$ -Allylic C–H Activation

**General procedure for the *trans*-diastereoselective [3 + 2] annulation of  $\alpha,\beta$ -unsaturated aldimines with 1-substituted 1,3-dienes *via*  $\beta'$ -allylic C–H activation by Sc-1 in the presence of AdNH<sub>2</sub>**

In a glovebox,  $[\text{Ph}_3\text{C}][\text{B}(\text{C}_6\text{F}_5)_4]$  (9.2 mg, 0.01 mmol) was added to a toluene-*d*<sub>8</sub> solution (1.0 mL) of **Sc-1** (5.1 mg, 0.01 mmol) in a J. Young NMR tube. After 5 min, 1-adamantylamine (1.5 mg, 0.010 mmol) was added to this tube. After 5 min,  $\alpha,\beta$ -unsaturated aldimines **1** (0.1 mmol) and 1-substituted 1,3-dienes **2** (0.3 mmol) were added. The tube was sealed, taken outside of glovebox, and stirred at indicated temperatures for indicated times. Then, the tube was cooled to room temperature and the reaction mixture was monitored by NMR. The crude NMR yields were calculated on the basis of formation of the corresponding product **3**. The solution was concentrated and purified directly by column chromatography on silica gel (hexane/EtOAc = 3/1, v/v) to give the pure product *trans*-**3**. The d.r. ratio was determined by  $^1\text{H}$  NMR analysis of the crude reaction mixture. Identical results were obtained when the reactions were conducted in toluene using a Schlenk tube.

**General procedure for the *cis*-diastereoselective [3 + 2] annulation of  $\alpha,\beta$ -unsaturated aldimines with 1,3-butadiene, 2-alkyl-substituted 1,3-butadienes**

and 1,3-cyclohexadiene via  $\beta'$ -allylic C–H activation by Sc-2 in the presence of AdNH<sub>2</sub>

In a glovebox, [Ph<sub>3</sub>C][B(C<sub>6</sub>F<sub>5</sub>)<sub>4</sub>] (9.2 mg, 0.01 mmol) was added to a toluene-*d*<sub>8</sub> solution (1.0 mL) of Sc-2 (4.6 mg, 0.01 mmol) in a J. Young NMR tube. After 5 min, 1-adamantylamine (1.5 mg, 0.010 mmol) was added to this tube. After 5 min,  $\alpha,\beta$ -unsaturated aldimines **1** (0.1 mmol) and 1,3-dienes (1.0 mmol), isoprene (1.0 mmol), 2-alkyl-substituted 1,3-butadienes (0.5 mmol) or 1,3-cyclohexadiene (0.5 mmol) were added. The tube was sealed, taken outside of glovebox, and stirred at indicated temperatures for indicated times. Then, the tube was cooled to room temperature and the reaction mixture was monitored by NMR. The crude NMR yields were calculated on the basis of formation of the corresponding product **3**. The solution was concentrated and purified directly by column chromatography on silica gel (hexane/EtOAc = 10/1, v/v) to give the pure product *cis*-**3** as major products and *trans*-**3** as minor products. The d.r. ratio was determined by <sup>1</sup>H NMR analysis of the crude reaction mixture. Identical results were obtained when the reactions were conducted in toluene using a Schlenk tube.

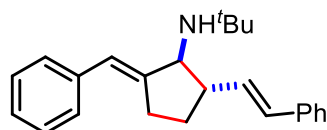

**(*Trans*)-2-((*E*)-benzylidene)-*N*-(*tert*-butyl)-5-((*E*)-styryl)cyclopentan-1-amine**

**(*trans*-3aa)**

The title compound was prepared according to the general procedure as a yellow solid (32.2 mg, 97% yield). <sup>1</sup>H NMR (600 MHz, CDCl<sub>3</sub>):  $\delta$  = 7.37-7.29 (m, 8H), 7.21-7.18 (m, 2H), 6.54 (s, 1H), 6.47 (d, *J* = 15.6 Hz, 1H), 6.17 (dd, *J* = 15.6, 9.0 Hz, 1H), 3.41 (d, *J* = 9.0 Hz, 1H), 2.77-2.66 (m, 2H), 2.33-2.27 (m, 1H), 2.08-2.05 (m, 1H), 1.75-1.69 (m, 1H), 1.29 (brs, 1H), 1.14 (s, 9H); <sup>13</sup>C NMR (101 MHz, CDCl<sub>3</sub>):  $\delta$  = 149.2, 138.4, 137.7, 133.5, 130.4, 128.6, 128.5, 128.3, 127.1, 126.1, 122.0, 64.4, 51.5, 51.1, 30.7, 29.3, 28.4. HRMS (ESI<sup>+</sup>): calcd for C<sub>24</sub>H<sub>30</sub>N [M+H]<sup>+</sup> 332.2373, found 332.2389.

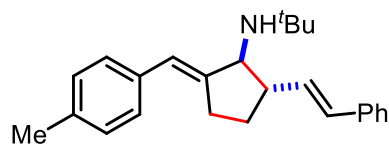

**(*Trans*)-*N*-(*tert*-butyl)-2-((*E*)-4-methylbenzylidene)-5-((*E*)-styryl)cyclopentan-1-amine (*trans*-3ba)**

The title compound was prepared according to the general procedure as a yellow solid (33.9 mg, 98% yield).  $^1\text{H}$  NMR (600 MHz,  $\text{CDCl}_3$ ):  $\delta$  = 7.36 (d,  $J$  = 7.2 Hz, 2H), 7.30 (t,  $J$  = 7.8 Hz, 2H), 7.26 (m, 2H), 7.20 (t,  $J$  = 7.8 Hz, 1H), 7.15 (d,  $J$  = 8.4 Hz, 2H), 6.49 (d,  $J$  = 2.4 Hz, 1H), 6.43 (d,  $J$  = 15.6 Hz, 1H), 6.16 (dd,  $J$  = 15.6, 9.0 Hz, 1H), 3.37 (d,  $J$  = 9.0 Hz, 1H), 2.75-2.64 (m, 2H), 2.34 (s, 3H), 2.30-2.28 (m, 1H), 2.07-2.02 (m, 1H), 1.72-1.67 (m, 1H), 1.33 (brs, 1H), 1.13 (s, 9H);  $^{13}\text{C}$  NMR (101 MHz,  $\text{CDCl}_3$ ):  $\delta$  = 148.4, 137.7, 135.8, 135.5, 133.6, 130.3, 129.0, 128.6, 128.4, 127.1, 126.1, 121.8, 64.3, 51.6, 51.1, 30.7, 29.3, 28.5, 21.3. HRMS (ESI $^+$ ): calcd for  $\text{C}_{25}\text{H}_{31}\text{N}$   $[\text{M}+\text{H}]^+$  346.2530, found 346.2545.

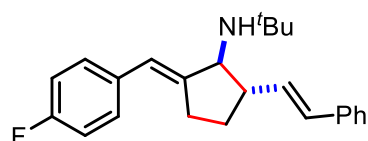

**(*Trans*)-*N*-(*tert*-butyl)-2-((*E*)-4-fluorobenzylidene)-5-((*E*)-styryl)cyclopentan-1-amine (*trans*-3ca)**

The title compound was prepared according to the general procedure as a yellow solid (21.7 mg, 62% yield).  $^1\text{H}$  NMR (600 MHz,  $\text{CDCl}_3$ ):  $\delta$  = 7.36 (d,  $J$  = 7.2 Hz, 2H), 7.32-7.29 (m, 4H), 7.21 (t,  $J$  = 7.2 Hz, 1H), 7.01 (t,  $J$  = 6.6 Hz, 1H), 6.50 (s, 1H), 6.43 (d,  $J$  = 15.6 Hz, 1H), 6.16 (dd,  $J$  = 15.6, 8.4 Hz, 1H), 3.39 (d,  $J$  = 9.0 Hz, 1H), 2.72-2.61 (m, 2H), 2.30-2.28 (m, 1H), 2.06-2.05 (m, 1H), 1.75-1.70 (m, 1H), 1.13 (s, 9H);  $^{13}\text{C}$  NMR (101 MHz,  $\text{CDCl}_3$ ):  $\delta$  = 161.5 (d,  $J$  = 246.4 Hz), 148.9, 137.6, 134.5 (d,  $J$  = 3.0 Hz), 130.6, 130.0 (d,  $J$  = 7.1 Hz), 128.6, 127.2, 126.1, 121.0, 115.2 (d,  $J$  = 21.2 Hz), 64.2, 51.4, 51.2, 30.6, 29.2, 28.3. HRMS (ESI $^+$ ): calcd for  $\text{C}_{24}\text{H}_{29}\text{FN}$   $[\text{M}+\text{H}]^+$  350.2279, found 350.2294.

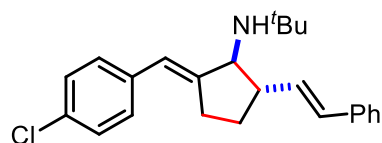

**(*Trans*)-*N*-(*tert*-butyl)-2-((*E*)-4-chlorobenzylidene)-5-((*E*)-styryl)cyclopentan-1-amine (*trans*-3da)**

The title compound was prepared according to the general procedure as a yellow solid (35.9 mg, 98% yield).  $^1\text{H}$  NMR (600 MHz,  $\text{CDCl}_3$ ):  $\delta$  = 7.35 (d,  $J$  = 7.2 Hz, 2H), 7.31-7.26 (m, 6H), 7.20 (t,  $J$  = 7.2 Hz, 1H), 6.49 (d,  $J$  = 2.4 Hz, 1H), 6.44 (d,  $J$  = 15.6 Hz, 1H), 6.14 (dd,  $J$  = 15.6, 9.0 Hz, 1H), 3.37 (d,  $J$  = 9.0 Hz, 1H), 2.76-2.57 (m, 2H), 2.32-2.24 (m, 1H), 2.09-2.01 (m, 1H), 1.76-1.67 (m, 1H), 1.41 (brs, 1H), 1.12 (s, 9H);  $^{13}\text{C}$  NMR (101 MHz,  $\text{CDCl}_3$ ):  $\delta$  = 150.1, 137.5, 136.8, 133.2, 131.7, 130.7, 129.7,

128.6, 128.4, 127.2, 126.1, 120.9, 64.3, 51.4, 51.2, 30.6, 29.2, 28.4. HRMS (ESI<sup>+</sup>): calcd for C<sub>24</sub>H<sub>29</sub>CIN [M+H]<sup>+</sup> 366.1984, found 366.2001.

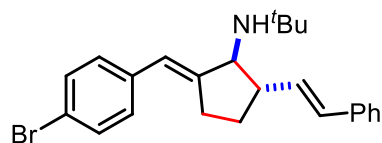

**(*Trans*)-2-((*E*)-4-bromobenzylidene)-*N*-(*tert*-butyl)-5-((*E*)-styryl)cyclopentan-1-amine (*trans*-3ea)**

The title compound was prepared according to the general procedure as a yellow solid (40.2 mg, 98% yield). <sup>1</sup>H NMR (600 MHz, CDCl<sub>3</sub>): δ = 7.43 (d, *J* = 8.4 Hz, 2H), 7.35 (d, *J* = 7.2 Hz, 2H), 7.30 (t, *J* = 7.8 Hz, 2H), 7.23-7.19 (m, 3H), 6.47 (s, 1H), 6.44 (d, *J* = 15.6 Hz, 1H), 6.14 (dd, *J* = 15.6, 9.0 Hz, 1H), 3.36 (d, *J* = 9.0 Hz, 1H), 2.73-2.56 (m, 2H), 2.29-2.22 (m, 1H), 2.09-2.01 (m, 1H), 1.76-1.67 (m, 1H), 1.12 (s, 9H); <sup>13</sup>C NMR (101 MHz, CDCl<sub>3</sub>): δ = 150.3, 137.5, 137.2, 133.2, 131.3, 130.7, 130.1, 128.6, 127.2, 126.1, 121.0, 119.8, 64.3, 51.3, 51.2, 30.6, 29.2, 28.4. HRMS (ESI<sup>+</sup>): calcd for C<sub>24</sub>H<sub>29</sub>BrN [M+H]<sup>+</sup> 410.1478, found 410.1487.

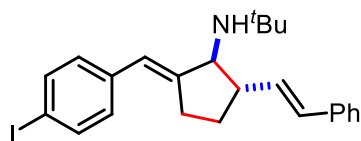

**(*Trans*)-*N*-(*tert*-butyl)-2-((*E*)-4-iodobenzylidene)-5-((*E*)-styryl)cyclopentan-1-amine (*trans*-3fa)**

The title compound was prepared according to the general procedure as a yellow solid (45.3 mg, 99% yield). <sup>1</sup>H NMR (600 MHz, CDCl<sub>3</sub>): δ = 7.63 (d, *J* = 8.4 Hz, 2H), 7.35 (d, *J* = 7.2 Hz, 2H), 7.30 (t, *J* = 7.2 Hz, 2H), 7.21 (t, *J* = 7.2 Hz, 1H), 7.09 (d, *J* = 8.4 Hz, 2H), 6.48-6.41 (m, 2H), 6.14 (dd, *J* = 15.6, 9.0 Hz, 1H), 3.35 (d, *J* = 9.0 Hz, 1H), 2.74-2.56 (m, 2H), 2.30-2.22 (m, 1H), 2.08-1.99 (m, 1H), 1.77-1.68 (m, 1H), 1.25 (brs, 1H), 1.11 (s, 9H); <sup>13</sup>C NMR (101 MHz, CDCl<sub>3</sub>): δ = 150.6, 137.8, 137.5, 137.3, 130.7, 130.4, 128.7, 127.2, 126.1, 121.0, 91.2, 64.3, 51.4, 51.1, 30.7, 29.2, 28.4. HRMS (ESI<sup>+</sup>): calcd for C<sub>24</sub>H<sub>29</sub>IN [M+H]<sup>+</sup> 458.1340, found 458.1358.

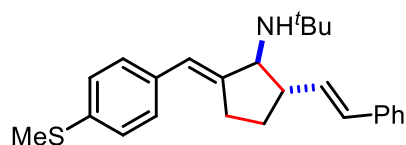

**(*Trans*)-*N*-(*tert*-butyl)-2-((*E*)-4-(methylthio)benzylidene)-5-((*E*)-styryl)cyclopentan-1-amine (*trans*-3ga)**

The title compound was prepared according to the general procedure as a yellow solid (34.4 mg, 91% yield).  $^1\text{H}$  NMR (600 MHz,  $\text{CDCl}_3$ ):  $\delta$  = 7.35 (d,  $J$  = 7.2 Hz, 2H), 7.32-7.26 (m, 4H), 7.24-7.18 (m, 3H), 6.49-6.41 (m, 2H), 6.15 (dd,  $J$  = 15.6, 9.0 Hz, 1H), 3.39 (d,  $J$  = 9.0 Hz, 1H), 2.79-2.59 (m, 2H), 2.48 (s, 3H), 2.37-2.22 (m, 1H), 2.11-2.00 (m, 1H), 1.78-1.65 (m, 1H), 1.13 (s, 9H);  $^{13}\text{C}$  NMR (101 MHz,  $\text{CDCl}_3$ ):  $\delta$  = 148.9, 137.6, 135.9, 135.4, 133.4, 130.5, 128.9, 128.6, 127.1, 126.7, 126.1, 121.5, 64.3, 51.4, 51.3, 30.6, 29.3, 28.5, 16.1. HRMS (ESI $^+$ ): calcd for  $\text{C}_{25}\text{H}_{32}\text{NS}$   $[\text{M}+\text{H}]^+$  378.2250, found 378.2255.

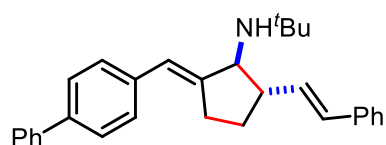

**(*Trans,E*)-2-([1,1'-biphenyl]-4-ylmethylene)-*N*-(*tert*-butyl)-5-((*E*)-styryl)cyclopentan-1-amine (*trans*-3ha)**

The title compound was prepared according to the general procedure as a yellow solid (28.9 mg, 71% yield).  $^1\text{H}$  NMR (600 MHz,  $\text{CDCl}_3$ ):  $\delta$  = 7.61 (d,  $J$  = 7.8 Hz, 2H), 7.58 (d,  $J$  = 8.4 Hz, 2H), 7.47-7.41 (m, 4H), 7.39-7.28 (m, 5H), 7.21 (t,  $J$  = 7.2 Hz, 1H), 6.57 (s, 1H), 6.46 (d,  $J$  = 15.6 Hz, 1H), 6.17 (dd,  $J$  = 15.6, 9.0 Hz, 1H), 3.41 (d,  $J$  = 9.0 Hz, 1H), 2.84-2.67 (m, 2H), 2.35-2.26 (m, 1H), 2.13-2.03 (m, 1H), 1.78-1.70 (m, 1H), 1.37 (brs, 1H), 1.14 (s, 9H);  $^{13}\text{C}$  NMR (101 MHz,  $\text{CDCl}_3$ ):  $\delta$  = 149.7, 141.0, 138.8, 137.6, 137.4, 133.5, 130.5, 128.9, 128.8, 128.6, 127.2, 127.1, 127.02, 126.96, 126.1, 121.5, 64.4, 51.5, 51.2, 30.7, 29.3, 28.6. HRMS (ESI $^+$ ): calcd for  $\text{C}_{30}\text{H}_{34}\text{N}$   $[\text{M}+\text{H}]^+$  408.2686, found 408.2703.

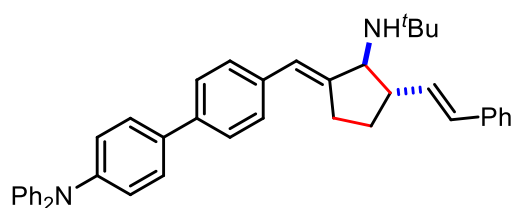

**(*Trans*)-4'-((*E*)-(2-(*tert*-butylamino)-3-((*E*)-styryl)cyclopentylidene)methyl)-*N,N*-diphenyl-[1,1'-biphenyl]-4-amine (*trans*-3ia)**

The title compound was prepared according to the general procedure as a yellow solid (43.1 mg, 75% yield).  $^1\text{H}$  NMR (600 MHz,  $\text{CDCl}_3$ ):  $\delta$  = 7.55 (d,  $J$  = 7.2 Hz, 2H), 7.49 (d,  $J$  = 7.2 Hz, 2H), 7.42 (d,  $J$  = 7.2 Hz, 2H), 7.37 (d,  $J$  = 7.8 Hz, 2H), 7.31 (t,  $J$  = 7.2 Hz, 2H), 7.28-7.26 (m, 4H), 7.21 (t,  $J$  = 7.2 Hz, 1H), 7.15-7.11 (m, 6H), 7.03 (t,  $J$  = 7.2 Hz, 2H), 6.56 (s, 1H), 6.46 (d,  $J$  = 15.6 Hz, 1H), 6.18 (dd,  $J$  = 15.6, 9.0 Hz, 1H), 3.42 (d,  $J$  = 9.0 Hz, 1H), 2.84-2.68 (m, 2H), 2.37-2.26 (m, 1H), 2.11-2.04 (m, 1H),

1.78-1.69 (m, 1H), 1.41 (brs, 1H), 1.15 (s, 9H);  $^{13}\text{C}$  NMR (101 MHz,  $\text{CDCl}_3$ ):  $\delta$  = 149.4, 147.8, 147.1, 138.2, 137.6, 136.9, 134.9, 133.5, 130.5, 129.4, 128.9, 128.7, 127.6, 127.1, 126.4, 126.1, 124.5, 124.1, 123.0, 121.6, 64.4, 51.5, 51.2, 30.7, 29.3, 28.6. HRMS ( $\text{ESI}^+$ ): calcd for  $\text{C}_{42}\text{H}_{43}\text{N}_2$   $[\text{M}+\text{H}]^+$  575.3421, found 575.3431.

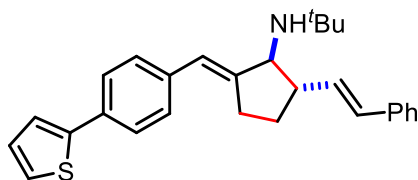

**(*Trans*)-*N*-(*tert*-butyl)-2-((*E*)-styryl)-5-((*E*)-4-(thiophen-2-yl)benzylidene)cyclopentan-1-amine (*trans*-3ja)**

The title compound was prepared according to the general procedure as a yellow oil (35.2 mg, 85% yield).  $^1\text{H}$  NMR (600 MHz,  $\text{CDCl}_3$ ):  $\delta$  = 7.59 (d,  $J$  = 8.4 Hz, 2H), 7.37-7.35 (m, 4H), 7.32-7.29 (m, 3H), 7.26 (m, 1H), 7.21 (t,  $J$  = 7.2 Hz, 1H), 7.07 (dd,  $J$  = 5.4, 4.2 Hz, 1H), 6.53 (d,  $J$  = 1.8 Hz, 1H), 6.46 (d,  $J$  = 16.2 Hz, 1H), 6.17 (dd,  $J$  = 16.2, 9.0 Hz, 1H), 3.41 (d,  $J$  = 9.0 Hz, 1H), 2.79-2.68 (m, 2H), 2.31-2.28 (m, 1H), 2.09-2.05 (m, 1H), 1.75-1.71 (m, 1H), 1.38 (brs, 1H), 1.14 (s, 9H);  $^{13}\text{C}\{^1\text{H}\}$  NMR (101 MHz,  $\text{CDCl}_3$ ):  $\delta$  = 149.8, 144.5, 137.6, 133.4, 132.1, 130.5, 129.0, 128.7, 128.1, 127.1, 126.1, 125.8, 124.6, 122.9, 121.5, 64.4, 51.5, 51.2, 30.7, 29.3, 28.6. HRMS ( $\text{ESI}^+$ ): calcd for  $\text{C}_{28}\text{H}_{32}\text{NS}$   $[\text{M}+\text{H}]^+$  414.2250, found 414.2269.

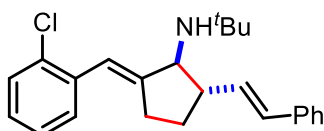

**(*Trans*)-*N*-(*tert*-butyl)-2-((*E*)-2-chlorobenzylidene)-5-((*E*)-styryl)cyclopentan-1-amine (*trans*-3ka)**

The title compound was prepared according to the general procedure as a yellow solid (34.8 mg, 95% yield).  $^1\text{H}$  NMR (600 MHz,  $\text{CDCl}_3$ ):  $\delta$  = 7.43 (d,  $J$  = 7.8 Hz, 1H), 7.38-7.35 (m, 3H), 7.30 (t,  $J$  = 7.2 Hz, 2H), 7.23-7.19 (m, 2H), 7.12 (t,  $J$  = 7.8 Hz, 1H), 6.80 (d,  $J$  = 2.4 Hz, 1H), 6.47 (d,  $J$  = 16.2 Hz, 1H), 6.18 (dd,  $J$  = 16.2, 9.0 Hz, 1H), 3.41 (d,  $J$  = 9.0 Hz, 1H), 2.66-2.59 (m, 2H), 2.35-2.33 (m, 1H), 2.04-1.99 (m, 1H), 1.71-1.65 (m, 1H), 1.36 (brs, 1H), 1.14 (s, 9H);  $^{13}\text{C}\{^1\text{H}\}$  NMR (101 MHz,  $\text{CDCl}_3$ ):  $\delta$  = 151.7, 137.7, 136.3, 133.7, 133.4, 130.4, 129.5, 129.4, 128.6, 127.4, 127.1, 126.4, 126.1, 118.7, 64.3, 51.8, 51.2, 30.7, 29.1, 28.1. HRMS ( $\text{ESI}^+$ ): calcd for  $\text{C}_{24}\text{H}_{29}\text{ClN}$   $[\text{M}+\text{H}]^+$  366.1984, found 366.1981.

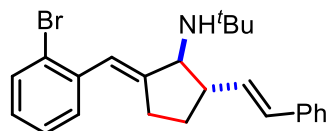

**(*Trans*)-2-((*E*)-2-bromobenzylidene)-*N*-(*tert*-butyl)-5-((*E*)-styryl)cyclopentan-1-amine (*trans*-3la)**

The title compound was prepared according to the general procedure as a yellow solid (40.6 mg, 99% yield).  $^1\text{H}$  NMR (600 MHz,  $\text{CDCl}_3$ ):  $\delta$  = 7.57 (d,  $J$  = 7.8 Hz, 1H), 7.41 (d,  $J$  = 7.2 Hz, 1H), 7.37 (d,  $J$  = 7.8 Hz, 2H), 7.30 (t,  $J$  = 7.2 Hz, 2H), 7.27-7.26 (m, 1H), 7.20 (t,  $J$  = 7.2 Hz, 1H), 7.04 (t,  $J$  = 8.4 Hz, 1H), 6.74 (d,  $J$  = 1.8 Hz, 1H), 6.47 (d,  $J$  = 16.2 Hz, 1H), 6.18 (dd,  $J$  = 16.2, 8.4 Hz, 1H), 3.43 (d,  $J$  = 9.0 Hz, 1H), 2.61-2.55 (m, 2H), 2.38-2.34 (m, 1H), 2.03-1.98 (m, 1H), 1.70-1.63 (m, 1H), 1.43 (brs, 1H), 1.15 (s, 9H);  $^{13}\text{C}\{^1\text{H}\}$  NMR (101 MHz,  $\text{CDCl}_3$ ):  $\delta$  = 151.6, 138.0, 137.7, 133.4, 132.8, 130.3, 129.5, 128.6, 127.7, 127.1, 127.0, 126.1, 124.5, 121.4, 64.2, 51.8, 51.2, 30.8, 29.1, 28.0. HRMS (ESI $^+$ ): calcd for  $\text{C}_{24}\text{H}_{29}\text{BrN}$   $[\text{M}+\text{H}]^+$  410.1478, found 410.1471.

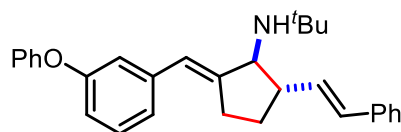

**(*Trans*)-*N*-(*tert*-butyl)-2-((*E*)-3-phenoxybenzylidene)-5-((*E*)-styryl)cyclopentan-1-amine (*trans*-3ma)**

The title compound was prepared according to the general procedure as a yellow solid (39.8 mg, 94% yield).  $^1\text{H}$  NMR (600 MHz,  $\text{CDCl}_3$ ):  $\delta$  = 7.37-7.27 (m, 7H), 7.20 (t,  $J$  = 7.8 Hz, 1H), 7.11-7.08 (m, 2H), 7.03-7.01 (m, 3H), 6.85-6.84 (m, 1H), 6.50 (d,  $J$  = 1.8 Hz, 1H), 6.45 (d,  $J$  = 15.6 Hz, 1H), 6.14 (dd,  $J$  = 15.6, 9.0 Hz, 1H), 3.39 (d,  $J$  = 9.0 Hz, 1H), 2.70-2.60 (m, 2H), 2.35-2.26 (m, 1H), 2.09-2.01 (m, 1H), 1.73-1.66 (m, 1H), 1.12 (s, 9H);  $^{13}\text{C}\{^1\text{H}\}$  NMR (101 MHz,  $\text{CDCl}_3$ ):  $\delta$  = 157.5, 157.1, 150.2, 150.1, 140.2, 137.6, 133.3, 130.6, 129.8, 129.5, 128.6, 127.2, 126.1, 123.8, 123.1, 121.7, 119.0, 118.8, 116.8, 64.3, 51.3, 30.6, 29.3, 28.4. HRMS (ESI $^+$ ): calcd for  $\text{C}_{30}\text{H}_{34}\text{NO}$   $[\text{M}+\text{H}]^+$  424.2635, found 424.2640.

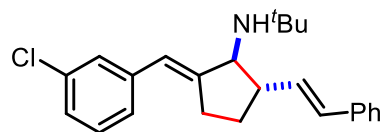

**(*Trans*)-*N*-(*tert*-butyl)-2-((*E*)-3-chlorobenzylidene)-5-((*E*)-styryl)cyclopentan-1-amine (*trans*-3na)**

The title compound was prepared according to the general procedure as a yellow solid (35.9 mg, 98% yield).  $^1\text{H}$  NMR (600 MHz,  $\text{CDCl}_3$ ):  $\delta$  = 7.35 (t,  $J$  = 7.2 Hz, 3H), 7.30 (t,  $J$  = 7.2 Hz, 2H), 7.26-7.19 (m, 3H), 7.16-7.14 (m, 1H), 6.48 (d,  $J$  = 1.8 Hz, 1H), 6.43 (d,  $J$  = 15.6 Hz, 1H), 6.15 (dd,  $J$  = 15.7, 9.0 Hz, 1H), 3.38 (d,  $J$  = 9.6 Hz, 1H), 2.75-2.63 (m, 2H), 2.28-2.23 (m, 1H), 2.07-2.03 (m, 1H), 1.76-1.71 (m, 1H), 1.30 (brs, 1H), 1.12 (s, 9H);  $^{13}\text{C}\{^1\text{H}\}$  NMR (101 MHz,  $\text{CDCl}_3$ ):  $\delta$  = 151.1, 140.2, 137.5, 134.1, 133.2, 130.7, 129.5, 128.7, 128.4, 127.2, 126.7, 126.13, 126.05, 120.8, 64.3, 51.4, 51.2, 30.7, 29.1, 28.4. HRMS (ESI $^+$ ): calcd for  $\text{C}_{24}\text{H}_{29}\text{ClN}$  [ $\text{M}+\text{H}$ ] $^+$  366.1984, found 366.1975.

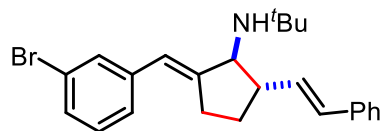

**(*Trans*)-2-((*E*)-3-bromobenzylidene)-*N*-(*tert*-butyl)-5-((*E*)-styryl)cyclopentan-1-amine (*trans*-3oa)**

The title compound was prepared according to the general procedure as a yellow solid (40.2 mg, 98% yield).  $^1\text{H}$  NMR (600 MHz,  $\text{CDCl}_3$ ):  $\delta$  = 7.49 (s, 1H), 7.35 (d,  $J$  = 7.2 Hz, 2H), 7.31-7.26 (m, 4H), 7.22-7.17 (m, 2H), 6.48 (d,  $J$  = 1.8 Hz, 1H), 6.46 (d,  $J$  = 15.6 Hz, 1H), 6.14 (dd,  $J$  = 15.6, 9.0 Hz, 1H), 3.38 (d,  $J$  = 9.0 Hz, 1H), 2.75-2.61 (m, 2H), 2.33-2.24 (m, 1H), 2.11-2.02 (m, 1H), 1.75-1.69 (m, 1H), 1.13 (s, 9H);  $^{13}\text{C}\{^1\text{H}\}$  NMR (101 MHz,  $\text{CDCl}_3$ ):  $\delta$  = 151.0, 140.5, 137.5, 133.1, 131.3, 130.7, 129.8, 129.0, 128.6, 127.2, 127.1, 126.1, 122.5, 120.9, 64.3, 51.3, 51.2, 30.6, 29.2, 28.3. HRMS (ESI $^+$ ): calcd for  $\text{C}_{24}\text{H}_{29}\text{BrN}$  [ $\text{M}+\text{H}$ ] $^+$  410.1478, found 410.1487.

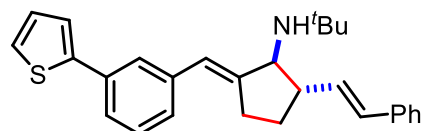

**(*Trans*)-*N*-(*tert*-butyl)-2-((*E*)-styryl)-5-((*E*)-3-(thiophen-2-yl)benzylidene)cyclopentan-1-amine (*trans*-3pa)**

The title compound was prepared according to the general procedure as a yellow solid (29.0 mg, 70% yield).  $^1\text{H}$  NMR (600 MHz,  $\text{CDCl}_3$ ):  $\delta$  = 7.60 (s, 1H), 7.45 (d,  $J$  = 7.8 Hz, 1H), 7.37-7.27 (m, 8H), 7.22-7.09 (m, 1H), 7.08-7.07 (m, 1H), 6.57 (d,  $J$  = 3.0 Hz, 1H), 6.44 (d,  $J$  = 15.6 Hz, 1H), 6.17 (dd,  $J$  = 15.6, 9.0 Hz, 1H), 3.41 (d,  $J$  = 9.0 Hz, 1H), 2.81-2.69 (m, 2H), 2.30-2.28 (m, 1H), 2.09-2.04 (m, 1H), 1.77-1.70 (m, 1H),

1.33 (brs, 1H), 1.14 (s, 9H);  $^{13}\text{C}\{^1\text{H}\}$  NMR (101 MHz,  $\text{CDCl}_3$ ):  $\delta = 150.1, 144.7, 138.9, 137.6, 134.4, 133.4, 130.6, 128.8, 128.7, 128.1, 127.6, 127.2, 126.2, 126.1, 124.8, 123.8, 123.2, 121.6, 64.3, 51.4, 51.2, 30.7, 29.2, 28.4$ . HRMS (ESI<sup>+</sup>): calcd for  $\text{C}_{28}\text{H}_{32}\text{NS}$   $[\text{M}+\text{H}]^+$  414.2250, found 414.2238.

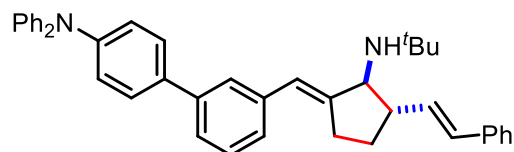

**(*Trans*)-3'-((*E*)-(2-(*tert*-butylamino)-3-((*E*)-styryl)cyclopentylidene)methyl)-*N,N*-diphenyl-[1,1'-biphenyl]-4-amine (*trans*-3qa)**

The title compound was prepared according to the general procedure as a yellow solid (43.1 mg, 75% yield).  $^1\text{H}$  NMR (400 MHz,  $\text{CDCl}_3$ ):  $\delta = 7.56$  (s, 1H), 7.50 (d,  $J = 8.4$  Hz, 2H), 7.40-7.27 (m, 11H), 7.23-7.13 (m, 8H), 7.03 (t,  $J = 7.2$  Hz, 2H), 6.60 (s, 1H), 6.48 (d,  $J = 16.0$  Hz, 1H), 6.18 (dd,  $J = 15.6, 8.8$  Hz, 1H), 3.43 (d,  $J = 8.8$  Hz, 1H), 2.80-2.70 (m, 2H), 2.33-2.26 (m, 1H), 2.10-2.03 (m, 1H), 1.79-1.71 (m, 1H), 1.15 (s, 9H);  $^{13}\text{C}\{^1\text{H}\}$  NMR (101 MHz,  $\text{CDCl}_3$ ):  $\delta = 149.7, 147.8, 147.2, 140.7, 138.7, 137.6, 135.4, 133.4, 130.5, 129.4, 128.70, 128.65, 128.6, 127.9, 127.2, 127.1, 127.0, 126.1, 124.6, 124.5, 124.0, 123.0, 122.0, 64.3, 51.5, 51.2, 30.7, 29.3, 28.6$ . HRMS (ESI<sup>+</sup>): calcd for  $\text{C}_{42}\text{H}_{43}\text{N}_2$   $[\text{M}+\text{H}]^+$  575.3421, found 575.3435.

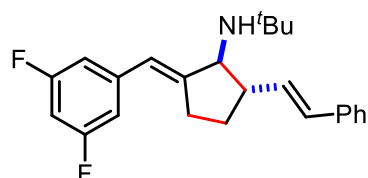

**(*Trans*)-*N*-(*tert*-butyl)-2-((*E*)-3,5-difluorobenzylidene)-5-((*E*)-styryl)cyclopentan-1-amine (*trans*-3ra)**

The title compound was prepared according to the general procedure as a yellow oil (33.4 mg, 91% yield).  $^1\text{H}$  NMR (600 MHz,  $\text{CDCl}_3$ ):  $\delta = 7.34$  (d,  $J = 7.8$  Hz, 2H), 7.30 (t,  $J = 7.8$  Hz, 2H), 7.21 (t,  $J = 7.8$  Hz, 1H), 6.85 (d,  $J = 7.2$  Hz, 2H), 6.62 (t,  $J = 8.4$  Hz, 1H), 6.47 (d,  $J = 2.4$  Hz, 1H), 6.43 (d,  $J = 15.6$  Hz, 1H), 6.13 (dd,  $J = 15.6, 9.0$  Hz, 1H), 3.37 (d,  $J = 10.2$  Hz, 1H), 2.74-2.62 (m, 2H), 2.26-2.24 (m, 1H), 2.08-2.04 (m, 1H), 1.76-1.71 (m, 1H), 1.36 (brs, 1H), 1.11 (s, 9H);  $^{13}\text{C}\{^1\text{H}\}$  NMR (101 MHz,  $\text{CDCl}_3$ ):  $\delta = 163.0$  (dd,  $J = 247.5, 13.1$  Hz), 152.5, 141.6 (t,  $J = 10.1$  Hz), 137.4, 133.0, 130.9, 128.7, 127.2, 126.1, 120.4, 110.0 (dd,  $J = 19.2, 7.1$  Hz), 101.3 (t,  $J = 25.3$  Hz), 64.2, 51.3, 51.1, 30.6, 29.1, 28.4. HRMS (ESI<sup>+</sup>): calcd for  $\text{C}_{24}\text{H}_{28}\text{F}_2\text{N}$   $[\text{M}+\text{H}]^+$  368.2185, found 368.2185.

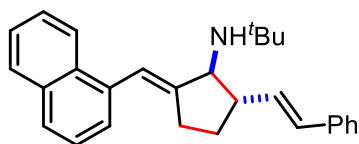

**(*Trans*)-(*E*)-*N*-(*tert*-butyl)-2-(naphthalen-1-ylmethylene)-5-((*E*)-styryl)cyclopentan-1-amine (*trans*-3sa)**

The title compound was prepared according to the general procedure as a yellow solid (31.7 mg, 83% yield).  $^1\text{H}$  NMR (400 MHz,  $\text{CDCl}_3$ ):  $\delta$  = 8.07-8.04 (m, 1H), 7.87-7.84 (m, 1H), 7.5-7.72 (m, 1H), 7.51-7.44 (m, 4H), 7.37 (d,  $J$  = 7.2 Hz, 2H), 7.32 (t,  $J$  = 7.2 Hz, 2H), 7.24-7.22 (m, 1H), 7.10 (d,  $J$  = 2.0 Hz, 1H), 6.50 (d,  $J$  = 16.0 Hz, 1H), 6.22 (dd,  $J$  = 15.6, 8.4 Hz, 1H), 3.49 (d,  $J$  = 9.1 Hz, 1H), 2.57-2.52 (m, 2H), 2.41-2.37 (m, 1H), 2.02-1.95 (m, 1H), 1.72-1.64 (m, 1H), 1.43 (brs, 1H), 1.21 (s, 9H);  $^{13}\text{C}\{^1\text{H}\}$  NMR (101 MHz,  $\text{CDCl}_3$ ):  $\delta$  = 151.3, 137.7, 135.6, 133.7, 133.6, 131.9, 130.4, 128.7, 128.6, 127.1, 126.8, 126.1, 126.0, 125.8, 125.7, 125.4, 124.7, 119.1, 63.9, 52.0, 51.2, 30.8, 29.0, 27.8. HRMS (ESI $^+$ ): calcd for  $\text{C}_{28}\text{H}_{32}\text{N}$   $[\text{M}+\text{H}]^+$  382.2530, found 382.2544.

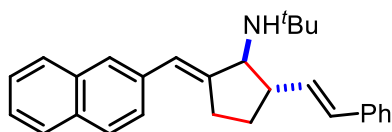

**(*Trans*)-(*E*)-*N*-(*tert*-butyl)-2-(naphthalen-2-ylmethylene)-5-((*E*)-styryl)cyclopentan-1-amine (*trans*-3ta)**

The title compound was prepared according to the general procedure as a yellow solid (27.4 mg, 72% yield).  $^1\text{H}$  NMR (600 MHz,  $\text{CDCl}_3$ ):  $\delta$  = 7.81-7.79 (m, 4H), 7.53 (d,  $J$  = 8.4 Hz, 1H), 7.46-7.42 (m, 2H), 7.38 (d,  $J$  = 7.2 Hz, 2H), 7.31 (t,  $J$  = 7.2 Hz, 2H), 7.21 (t,  $J$  = 7.2 Hz, 1H), 6.69 (d,  $J$  = 1.8 Hz, 1H), 6.45 (d,  $J$  = 15.6 Hz, 1H), 6.19 (dd,  $J$  = 15.6, 9.0 Hz, 1H), 3.44 (d,  $J$  = 9.6 Hz, 1H), 2.89-2.75 (m, 2H), 2.35-2.31 (m, 1H), 2.30-2.06 (m, 1H), 1.79-1.74 (m, 1H), 1.33 (brs, 1H), 1.16 (s, 9H);  $^{13}\text{C}\{^1\text{H}\}$  NMR (101 MHz,  $\text{CDCl}_3$ ):  $\delta$  = 150.1, 137.6, 135.9, 133.6, 133.5, 132.0, 130.5, 128.6, 128.0, 127.7, 127.6, 127.2, 127.1, 127.0, 126.13, 126.07, 125.5, 122.0, 64.4, 51.6, 51.2, 30.7, 29.3, 28.6. HRMS (ESI $^+$ ): calcd for  $\text{C}_{28}\text{H}_{32}\text{N}$   $[\text{M}+\text{H}]^+$  382.2530, found 382.2543.

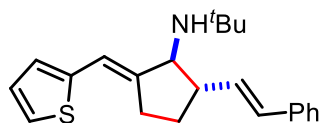

**(*Trans*)-(*E*)-*N*-(*tert*-butyl)-2-((*E*)-styryl)-5-(thiophen-2-ylmethylene)cyclopentan-1-amine (*trans*-3ua)**

The title compound was prepared according to the general procedure as a brown solid (24.3 mg, 72% yield).  $^1\text{H}$  NMR (600 MHz,  $\text{CDCl}_3$ ):  $\delta$  = 7.35 (d,  $J$  = 7.8 Hz, 2H), 7.30 (t,  $J$  = 7.8 Hz, 2H), 7.24-7.19 (m, 2H), 7.03 (d,  $J$  = 3.6 Hz, 1H), 6.98 (d,  $J$  = 3.6 Hz, 1H), 6.73 (d,  $J$  = 2.5 Hz, 1H), 6.46 (d,  $J$  = 15.6 Hz, 1H), 6.16 (dd,  $J$  = 15.6, 9.0 Hz, 1H), 3.41 (d,  $J$  = 10.8 Hz, 1H), 2.67-2.64 (m, 2H), 2.32-2.28 (m, 1H), 2.11-2.08 (m, 1H), 1.76-1.72 (m, 1H), 1.28 (brs, 1H), 1.12 (s, 9H);  $^{13}\text{C}\{^1\text{H}\}$  NMR (101 MHz,  $\text{CDCl}_3$ ):  $\delta$  = 148.0, 142.4, 137.6, 133.2, 130.5, 128.6, 127.1, 127.0, 126.1, 125.6, 124.5, 115.5, 64.1, 52.2, 51.1, 30.7, 29.2, 29.0. HRMS (ESI<sup>+</sup>): calcd for  $\text{C}_{27}\text{H}_{28}\text{NS}$   $[\text{M}+\text{H}]^+$  338.1937, found 338.1940.

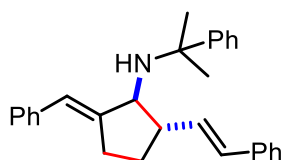

**(*Trans*)-2-((*E*)-benzylidene)-*N*-(2-phenylpropan-2-yl)-5-((*E*)-styryl)cyclopentan-1-amine (*trans*-3va)**

The title compound was prepared according to the general procedure as a yellow solid (38.6 mg, 98% yield).  $^1\text{H}$  NMR (600 MHz,  $\text{CDCl}_3$ ):  $\delta$  = 7.51 (d,  $J$  = 7.8 Hz, 2H), 7.34-7.18 (m, 13H), 6.38 (s, 1H), 6.33 (d,  $J$  = 16.2 Hz, 1H), 5.76 (dd,  $J$  = 15.6, 9.0 Hz, 1H), 3.30 (d,  $J$  = 7.8 Hz, 1H), 2.65-2.63 (m, 2H), 2.33-2.31 (m, 1H), 2.05-2.00 (m, 1H), 1.64-1.59 (m, 1H), 1.53 (s, 6H);  $^{13}\text{C}\{^1\text{H}\}$  NMR (101 MHz,  $\text{CDCl}_3$ ):  $\delta$  = 149.1, 148.6, 138.3, 137.5, 133.2, 130.2, 128.5, 128.3, 128.1, 127.1, 126.5, 126.4, 126.3, 126.2, 122.5, 64.8, 56.1, 50.9, 30.5, 29.7, 29.6, 28.2. HRMS (ESI<sup>+</sup>): calcd for  $\text{C}_{29}\text{H}_{32}\text{N}$   $[\text{M}+\text{H}]^+$  394.2530, found 394.2540.

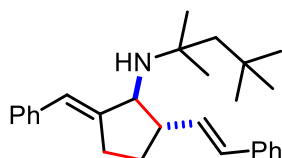

**(*Trans*)-2-((*E*)-benzylidene)-5-((*E*)-styryl)-*N*-(2,4,4-trimethylpentan-2-yl)cyclopentan-1-amine (*trans*-3wa)**

The title compound was prepared according to the general procedure as a yellow solid (36.8 mg, 95% yield).  $^1\text{H}$  NMR (400 MHz,  $\text{CDCl}_3$ ):  $\delta$  = 7.37-7.28 (m, 8H), 7.22-7.17 (m, 2H), 6.56 (d,  $J$  = 2.0 Hz, 1H), 6.45 (d,  $J$  = 16.0 Hz, 1H), 6.16 (dd,  $J$  = 15.6, 8.8 Hz, 1H), 3.42 (d,  $J$  = 8.8 Hz, 1H), 2.73-2.66 (m, 2H), 2.32-2.28 (m, 1H), 2.09-2.01 (m, 1H), 1.76-1.67 (m, 1H), 1.48 (d,  $J$  = 6.0 Hz, 2H), 1.47 (brs, 1H), 1.18 (s, 3H), 1.14 (s,

3H), 1.00 (s, 9H);  $^{13}\text{C}\{^1\text{H}\}$  NMR (101 MHz,  $\text{CDCl}_3$ ):  $\delta$  = 149.8, 138.4, 137.7, 133.7, 130.3, 128.6, 128.5, 128.3, 127.1, 126.1, 122.1, 64.1, 57.2, 55.1, 51.7, 32.1, 31.8, 29.7, 29.4, 29.3, 28.4. HRMS (ESI<sup>+</sup>): calcd for  $\text{C}_{28}\text{H}_{38}\text{N}$   $[\text{M}+\text{H}]^+$  388.2999, found 388.2980.

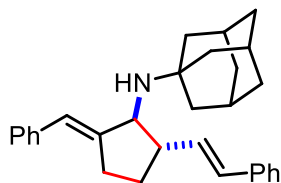

**(*Trans*)-*N*-(2-((*E*)-benzylidene)-5-((*E*)-styryl)cyclopentyl)adamantan-1-amine**

**(*trans*-3xa)**

The title compound was prepared according to the general procedure as a yellow solid (40.1 mg, 98% yield).  $^1\text{H}$  NMR (400 MHz,  $\text{CDCl}_3$ ):  $\delta$  = 7.38-7.29 (m, 8H), 7.22-7.16 (m, 2H), 6.56 (d,  $J$  = 2.0 Hz, 1H), 6.47 (d,  $J$  = 16.0 Hz, 1H), 6.17 (dd,  $J$  = 16.0, 8.8 Hz, 1H), 3.53 (d,  $J$  = 8.8 Hz, 1H), 2.78-2.64 (m, 2H), 2.31-2.27 (m, 1H), 2.09-2.04 (m, 4H), 1.71-1.57 (m, 13H), 1.35 (brs, 1H);  $^{13}\text{C}\{^1\text{H}\}$  NMR (101 MHz,  $\text{CDCl}_3$ ):  $\delta$  = 149.8, 138.4, 137.8, 133.5, 130.4, 128.6, 128.5, 128.3, 127.1, 126.2, 126.1, 122.0, 62.1, 51.6, 51.1, 44.5, 36.8, 29.9, 29.3, 28.5. HRMS (ESI<sup>+</sup>): calcd for  $\text{C}_{30}\text{H}_{36}\text{N}$   $[\text{M}+\text{H}]^+$  410.2843, found 410.2850.

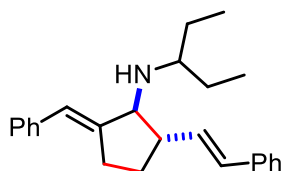

**(*Trans*)-2-((*E*)-benzylidene)-*N*-(pentan-3-yl)-5-((*E*)-styryl)cyclopentan-1-amine**

**(*trans*-3ya)**

The title compound was prepared according to the general procedure as a yellow oil (15.5 mg, 45% yield).  $^1\text{H}$  NMR (400 MHz,  $\text{CDCl}_3$ ):  $\delta$  = 7.38-7.26 (m, 8H), 7.22-7.16 (m, 2H), 6.53 (d,  $J$  = 2.4 Hz, 1H), 6.45 (d,  $J$  = 15.6 Hz, 1H), 6.19 (dd,  $J$  = 15.6, 8.8 Hz, 1H), 3.42 (d,  $J$  = 8.4 Hz, 1H), 2.73-2.62 (m, 3H), 2.45-2.41 (m, 1H), 2.10-2.05 (m, 1H), 1.69-1.64 (m, 1H), 1.48-1.38 (m, 4H), 0.92 (t,  $J$  = 7.6 Hz, 3H), 0.84 (t,  $J$  = 7.2 Hz, 3H);  $^{13}\text{C}\{^1\text{H}\}$  NMR (101 MHz,  $\text{CDCl}_3$ ):  $\delta$  = 148.1, 138.3, 137.7, 133.3, 130.2, 128.6, 128.5, 128.3, 127.1, 126.2, 126.1, 122.1, 67.6, 58.7, 51.0, 30.4, 28.8, 26.7, 26.5, 10.1. HRMS (ESI<sup>+</sup>): calcd for  $\text{C}_{25}\text{H}_{32}\text{N}$   $[\text{M}+\text{H}]^+$  346.2530, found 346.2531.

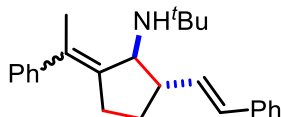

**(*Trans,E*)-*N*-(*tert*-butyl)-2-(1-phenylethylidene)-5-((*E*)-styryl)cyclopentan-1-amine (*trans,E*-3za)**

**(*Trans,Z*)-*N*-(*tert*-butyl)-2-(1-phenylethylidene)-5-((*E*)-styryl)cyclopentan-1-amine (*trans,Z*-3za)**

The title compound was prepared according to the general procedure as a yellow oil (**Sc-1**: total: 19.3 mg, 56% yield, *E/Z* = 1:1). (*E*):  $^1\text{H}$  NMR (400 MHz,  $\text{CDCl}_3$ ):  $\delta$  = 7.39-7.17 (m, 10H), 6.43-6.37 (m, 1H), 6.20-6.16 (m, 1H), 3.80 (s, 1H), 2.84 (m, 1H), 2.61-2.19 (m, 3H), 2.09 (s, 3H), 1.51-1.44 (m, 1H), 1.24 (brs, 1H), 1.24 (s, 9H); (*Z*):  $^1\text{H}$  NMR (400 MHz,  $\text{CDCl}_3$ ):  $\delta$  = 7.39-7.17 (m, 10H), 6.43-6.37 (m, 1H), 6.20-6.16 (m, 1H), 3.66 (s, 1H), 2.84 (m, 1H), 2.61-2.22 (m, 3H), 1.97 (s, 3H), 1.74-1.69 (m, 1H), 0.69 (s, 9H);  $^{13}\text{C}\{^1\text{H}\}$  NMR (101 MHz,  $\text{CDCl}_3$ ):  $\delta$  = 144.6, 144.1, 144.0, 143.4, 143.3, 142.4, 142.3, 137.9, 137.7, 133.8, 133.1, 128.9, 128.64, 128.61, 128.1, 127.9, 127.1, 127.0, 126.3, 126.14, 126.10, 61.4, 60.5, 51.2, 39.3, 35.1, 30.6, 30.5, 29.7, 29.5, 29.4, 28.7, 22.9, 21.2. HRMS (ESI<sup>+</sup>): calcd for  $\text{C}_{25}\text{H}_{32}\text{N}$  [ $\text{M}+\text{H}$ ]<sup>+</sup> 346.2530, found 346.2540.

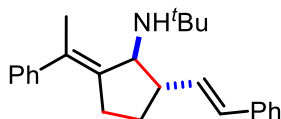

**(*Trans,E*)-*N*-(*tert*-butyl)-2-(1-phenylethylidene)-5-((*E*)-styryl)cyclopentan-1-amine (*trans*-3za)**

The title compound was prepared according to the general procedure as a yellow oil (**Y-2**: 28.3 mg, 82% yield).  $^1\text{H}$  NMR (400 MHz,  $\text{CDCl}_3$ ):  $\delta$  = 7.37-7.28 (m, 7H), 7.22-7.20 (m, 3H), 6.37 (d,  $J$  = 15.6 Hz, 1H), 6.16 (dd,  $J$  = 16.0, 8.8 Hz, 1H), 3.79 (s, 1H), 2.83-2.81 (m, 1H), 2.43-2.38 (m, 1H), 2.24-2.13 (m, 1H), 2.09 (s, 3H), 1.52-1.48 (m, 1H), 1.22 (brs, 1H), 1.22 (s, 9H);  $^{13}\text{C}\{^1\text{H}\}$  NMR (101 MHz,  $\text{CDCl}_3$ ):  $\delta$  = 144.7, 143.6, 137.9, 133.9, 130.1, 128.9, 128.6, 128.1, 127.9, 127.0, 126.3, 126.1, 61.4, 51.5, 51.3, 30.6, 29.7, 21.1. HRMS (ESI<sup>+</sup>): calcd for  $\text{C}_{25}\text{H}_{32}\text{N}$  [ $\text{M}+\text{H}$ ]<sup>+</sup> 346.2530, found 346.2540.

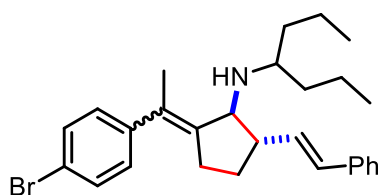

**(*Trans,E*)-2-(1-(4-bromophenyl)ethylidene)-*N*-(heptan-4-yl)-5-((*E*)-styryl)cyclopentan-1-amine (*trans,E*-3aaa)**

**(*Trans,Z*)-2-(1-(4-bromophenyl)ethylidene)-*N*-(heptan-4-yl)-5-((*E*)-styryl)cyclopentan-1-amine (*trans,Z*-3aaa)**

**(*trans,E*-3aaa):** The title compound was prepared according to the general procedure as a yellow oil (20.5 mg, 44% yield).  $^1\text{H}$  NMR (600 MHz,  $\text{CDCl}_3$ ):  $\delta$  = 7.43 (d,  $J$  = 8.4 Hz, 2H), 7.34-7.28 (m, 4H), 7.21-7.18 (m, 1H), 7.08 (d,  $J$  = 8.4 Hz, 2H), 6.42 (d,  $J$  = 15.6 Hz, 1H), 6.16 (dd,  $J$  = 15.6, 8.4 Hz, 1H), 3.73 (s, 1H), 2.77-2.70 (m, 2H), 2.36 (m, 1H), 2.22 (m, 1H), 2.06 (s, 3H), 1.60-1.56 (m, 5H), 1.50-1.35 (m, 6H), 0.92-0.89 (m, 6H);  $^{13}\text{C}\{^1\text{H}\}$  NMR (101 MHz,  $\text{CDCl}_3$ ):  $\delta$  = 143.3, 137.8, 137.7, 133.8, 131.2, 129.6, 129.2, 128.6, 127.1, 126.1, 124.5, 120.1, 63.8, 54.9, 49.7, 37.4, 36.0, 30.8, 30.2, 20.7, 19.3, 18.9, 14.51, 14.49. HRMS (ESI $^+$ ): calcd for  $\text{C}_{28}\text{H}_{37}\text{BrN}$  [ $\text{M}+\text{H}$ ] $^+$  466.2104, found 466.2106. **(*trans,Z*-3aaa):** The title compound was prepared according to the general procedure as a yellow oil (13.5 mg, 29% yield).  $^1\text{H}$  NMR (400 MHz,  $\text{CDCl}_3$ ):  $\delta$  = 7.41 (d,  $J$  = 8.4 Hz, 2H), 7.36-7.28 (m, 4H), 7.22-7.18 (m, 1H), 7.10 (d,  $J$  = 8.4 Hz, 2H), 6.37 (d,  $J$  = 15.6 Hz, 1H), 6.13 (dd,  $J$  = 16.0, 8.0 Hz, 1H), 3.52 (s, 1H), 2.71-2.67 (m, 1H), 2.55-2.41 (m, 2H), 2.25-2.16 (m, 2H), 1.93 (s, 3H), 1.45-1.42 (m, 3H), 1.17-1.10 (m, 2H), 1.04-0.96 (m, 1H), 0.83-0.80 (m, 6H), 0.72-0.70 (m, 3H);  $^{13}\text{C}\{^1\text{H}\}$  NMR (101 MHz,  $\text{CDCl}_3$ ):  $\delta$  = 142.9, 137.7, 133.2, 131.7, 129.8, 129.2, 128.6, 127.1, 126.1, 120.5, 63.1, 54.8, 48.4, 37.5, 35.5, 29.8, 28.8, 22.3, 19.3, 18.3, 14.5, 14.4. HRMS (ESI $^+$ ): calcd for  $\text{C}_{28}\text{H}_{37}\text{BrN}$  [ $\text{M}+\text{H}$ ] $^+$  466.2104, found 466.2101.

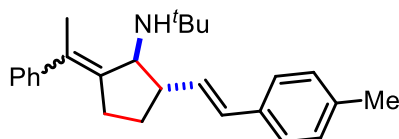

**(*Trans,E*)-*N*-(*tert*-butyl)-2-((*E*)-4-methylstyryl)-5-(1-phenylethylidene)cyclopentan-1-amine (*trans,E*-3aba)**

**(*Trans,Z*)-*N*-(*tert*-butyl)-2-((*E*)-4-methylstyryl)-5-(1-phenylethylidene)cyclopentan-1-amine (*trans,Z*-3aba)**

The title compound was prepared according to the general procedure as a yellow oil (**Sc-1**: total: 15.8 mg, 44% yield,  $E/Z$  = 2:1). (*E*):  $^1\text{H}$  NMR (400 MHz,  $\text{CDCl}_3$ ):  $\delta$  =

7.33-7.10 (m, 9H), 6.38-6.33 (m, 1H), 6.15-6.06 (m, 1H), 3.78 (s, 1H), 2.80-2.75 (m, 1H), 2.43-2.36 (m, 1H), 2.32 (s, 3H), 2.24-2.16 (m, 2H), 2.08 (s, 3H), 1.50-1.45 (m, 1H), 1.21 (brs, 1H), 1.21 (s, 9H); (**Z**):  $^1\text{H}$  NMR (400 MHz,  $\text{CDCl}_3$ ):  $\delta$  = 7.33-7.10 (m, 4.5H), 6.38-6.33 (m, 0.5H), 6.15-6.06 (m, 0.5H), 3.61 (s, 0.5H), 2.80-2.75 (m, 0.5H), 2.56-2.50 (m, 0.5H), 2.33 (s, 1.5H), 2.24-2.16 (m, 1H), 1.96 (s, 1.5H), 1.73-1.67 (m, 0.5H), 0.65 (s, 4.5H);  $^{13}\text{C}\{^1\text{H}\}$  NMR (101 MHz,  $\text{CDCl}_3$ ):  $\delta$  = 144.7, 144.2, 143.7, 143.6, 136.8, 136.7, 135.1, 132.9, 132.4, 130.0, 129.3, 128.7, 128.6, 128.1, 127.9, 126.5, 126.3, 126.00, 125.98, 61.4, 60.5, 51.5, 51.3, 50.6, 30.7, 29.8, 29.5, 28.7, 22.8, 21.3, 21.1. HRMS (ESI<sup>+</sup>): calcd for  $\text{C}_{26}\text{H}_{34}\text{N}$  [ $\text{M}+\text{H}$ ]<sup>+</sup> 360.2686, found 360.2680.

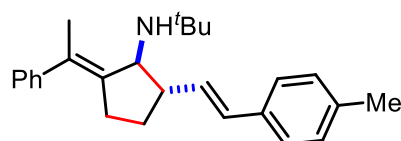

**(*Trans,E*)-*N*-(*tert*-butyl)-2-((*E*)-4-methylstyryl)-5-(1-phenylethylidene)cyclopentan-1-amine (*trans*-3aba)**

The title compound was prepared according to the general procedure as a yellow oil (**Y-2**: 20.1 mg, 56% yield).  $^1\text{H}$  NMR (400 MHz,  $\text{CDCl}_3$ ):  $\delta$  = 7.33-7.29 (m, 2H), 7.26-7.24 (m, 3H), 7.22 (d,  $J$  = 7.2 Hz, 2H), 7.10 (d,  $J$  = 7.6 Hz, 2H), 6.33 (d,  $J$  = 16.0 Hz, 1H), 6.09 (dd,  $J$  = 16.0, 8.8 Hz, 1H), 3.79 (s, 1H), 2.82 (m, 1H), 2.42-2.29 (m, 4H), 2.23-2.08 (m, 5H), 1.50-1.46 (m, 1H), 1.23 (brs, 1H), 1.23 (s, 9H);  $^{13}\text{C}\{^1\text{H}\}$  NMR (101 MHz,  $\text{CDCl}_3$ ):  $\delta$  = 144.7, 136.7, 135.1, 132.8, 129.3, 128.7, 128.1, 127.9, 126.3, 126.0, 61.4, 51.6, 51.1, 30.7, 30.6, 29.8, 21.3, 21.2. HRMS (ESI<sup>+</sup>): calcd for  $\text{C}_{26}\text{H}_{34}\text{N}$  [ $\text{M}+\text{H}$ ]<sup>+</sup> 360.2686, found 360.2688.

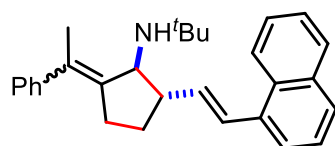

**(*Trans,E*)-*N*-(*tert*-butyl)-2-((*E*)-2-(naphthalen-1-yl)vinyl)-5-(1-phenylethylidene)cyclopentan-1-amine (*trans,E*-3aca)**

**(*Trans,Z*)-*N*-(*tert*-butyl)-2-((*E*)-2-(naphthalen-1-yl)vinyl)-5-(1-phenylethylidene)cyclopentan-1-amine (*trans,Z*-3aca)**

The title compound was prepared according to the general procedure as a yellow solid (**Sc-1**: total: 18.6 mg, 47% yield,  $E/Z$  = 1.4:1). (**E**):  $^1\text{H}$  NMR (400 MHz,  $\text{CDCl}_3$ ):  $\delta$  = 8.11-8.06 (m, 1H), 7.86-7.82 (m, 1H), 7.77-7.73 (m, 1H), 7.59-7.41 (m, 4H), 7.33-7.29 (m, 2H), 7.23-7.09 (m, 4H), 3.89 (s, 1H), 2.94-2.90 (m, 1H), 2.57-2.43 (m, 1H), 2.35-2.20 (m, 2H), 2.10 (s, 3H), 1.61-1.57 (m, 1H), 1.26 (brs, 1H), 1.26 (s, 9H); (**Z**):  $^1\text{H}$  NMR (400 MHz,  $\text{CDCl}_3$ ):  $\delta$  = 8.11-8.06 (m, 0.6H), 7.86-7.82 (m, 0.8H),

7.77-7.73 (m, 0.8H), 7.59-7.41 (m, 3.2H), 7.33-7.29 (m, 1.6H), 7.23-7.09 (m, 3.2H), 3.89 (s, 0.8H), 2.94-2.90 (m, 0.8H), 2.57-2.43 (m, 1.6H), 2.35-2.20 (m, 0.8H), 1.98 (s, 2.4H), 1.83-1.78 (m, 0.8H), 0.71 (s, 7.2H);  $^{13}\text{C}\{^1\text{H}\}$  NMR (101 MHz,  $\text{CDCl}_3$ ):  $\delta$  = 144.7, 144.2, 143.7, 143.6, 136.8, 136.7, 135.1, 132.9, 132.4, 130.0, 129.3, 128.7, 128.6, 128.1, 127.9, 126.5, 126.3, 126.00, 125.98, 61.4, 60.5, 51.5, 51.3, 50.6, 30.7, 29.8, 29.5, 28.7, 22.8, 21.3, 21.1. HRMS (ESI<sup>+</sup>): calcd for  $\text{C}_{29}\text{H}_{34}\text{N}$   $[\text{M}+\text{H}]^+$  396.2686, found 396.2695.

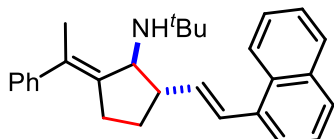

**(*Trans,E*)-*N*-(*tert*-butyl)-2-((*E*)-2-(naphthalen-1-yl)vinyl)-5-(1-phenylethylidene)cyclopentan-1-amine (*trans*-3aca)**

The title compound was prepared according to the general procedure as a yellow solid (**Y-2**: 31.6 mg, 80% yield).  $^1\text{H}$  NMR (400 MHz,  $\text{CDCl}_3$ ):  $\delta$  = 8.09 (d,  $J$  = 9.2 Hz, 1H), 7.85 (d,  $J$  = 9.2 Hz, 1H), 7.76 (d,  $J$  = 8.0 Hz, 1H), 7.56-7.42 (m, 4H), 7.32 (t,  $J$  = 8.0 Hz, 1H), 7.23 (d,  $J$  = 9.4 Hz, 3H), 7.13 (d,  $J$  = 15.6 Hz, 1H), 6.18 (dd,  $J$  = 15.6, 8.4 Hz, 1H), 3.89 (s, 1H), 2.97-2.95 (m, 1H), 2.49-2.41 (m, 1H), 2.30-2.20 (m, 2H), 2.11 (s, 3H), 1.62-1.56 (m, 1H), 1.27 (brs, 1H), 1.27 (s, 9H);  $^{13}\text{C}\{^1\text{H}\}$  NMR (101 MHz,  $\text{CDCl}_3$ ):  $\delta$  = 144.7, 143.6, 137.3, 135.8, 133.7, 131.2, 130.1, 128.6, 128.1, 127.9, 127.4, 126.3, 126.1, 125.9, 125.8, 124.0, 123.6, 61.4, 51.5, 30.7, 30.6, 29.8, 21.3. HRMS (ESI<sup>+</sup>): calcd for  $\text{C}_{29}\text{H}_{34}\text{N}$   $[\text{M}+\text{H}]^+$  396.2686, found 396.2690.

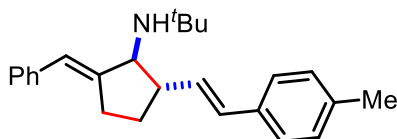

**(*Trans*)-2-((*E*)-benzylidene)-*N*-(*tert*-butyl)-5-((*E*)-4-methylstyryl)cyclopentan-1-amine (*trans*-3ab)**

The title compound was prepared according to the general procedure as a yellow solid (33.9 mg, 98% yield).  $^1\text{H}$  NMR (600 MHz,  $\text{CDCl}_3$ ):  $\delta$  = 7.37-7.32 (m, 4H), 7.26 (m, 2H), 7.18 (t,  $J$  = 7.2 Hz, 1H), 7.11 (d,  $J$  = 7.2 Hz, 2H), 6.53 (s, 1H), 6.41 (d,  $J$  = 16.2 Hz, 1H), 6.11 (dd,  $J$  = 16.2, 9.0 Hz, 1H), 3.38 (d,  $J$  = 9.0 Hz, 1H), 2.77-2.64 (m, 2H), 2.33 (s, 3H), 2.28-2.26 (m, 1H), 2.07-2.03 (m, 1H), 1.74-1.69 (m, 1H), 1.26 (brs, 1H), 1.13 (s, 9H);  $^{13}\text{C}\{^1\text{H}\}$  NMR (101 MHz,  $\text{CDCl}_3$ ):  $\delta$  = 149.5, 138.4, 136.9, 134.9, 132.4, 130.3, 129.3, 128.5, 128.3, 126.1, 126.0, 121.9, 64.3, 51.5, 51.1, 30.7, 29.3, 28.4, 21.3. HRMS (ESI<sup>+</sup>): calcd for  $\text{C}_{25}\text{H}_{32}\text{N}$   $[\text{M}+\text{H}]^+$  346.2530, found 346.2537.

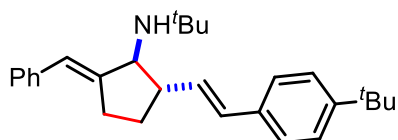

**(*Trans*)-2-((*E*)-benzylidene)-*N*-(*tert*-butyl)-5-((*E*)-4-(*tert*-butyl)styryl)cyclopentan-1-amine (*trans*-3ac)**

The title compound was prepared according to the general procedure as a yellow solid (23.6 mg, 61% yield).  $^1\text{H}$  NMR (400 MHz,  $\text{CDCl}_3$ ):  $\delta$  = 7.37-7.28 (m, 8H), 7.21-7.18 (m, 1H), 6.53 (d,  $J$  = 2.0 Hz, 1H), 6.40 (d,  $J$  = 15.6 Hz, 1H), 6.12 (dd,  $J$  = 15.6, 8.8 Hz, 1H), 3.39 (d,  $J$  = 8.8 Hz, 1H), 2.75-2.66 (m, 2H), 2.29-2.23 (m, 1H), 2.09-1.99 (m, 1H), 1.75-1.67 (m, 1H), 1.31 (s, 9H), 1.13 (s, 9H);  $^{13}\text{C}\{^1\text{H}\}$  NMR (101 MHz,  $\text{CDCl}_3$ ):  $\delta$  = 150.2, 149.4, 138.4, 134.9, 132.7, 130.2, 128.5, 128.3, 126.1, 125.8, 125.6, 121.9, 64.3, 51.5, 51.2, 34.6, 31.4, 30.7, 29.3, 28.4. HRMS (ESI<sup>+</sup>): calcd for  $\text{C}_{28}\text{H}_{38}\text{N}$   $[\text{M}+\text{H}]^+$  388.2999, found 388.3011.

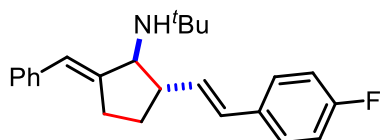

**(*Trans*)-2-((*E*)-benzylidene)-*N*-(*tert*-butyl)-5-((*E*)-4-fluorostyryl)cyclopentan-1-amine (*trans*-3ad)**

The title compound was prepared according to the general procedure as a yellow solid (28.0 mg, 80% yield).  $^1\text{H}$  NMR (400 MHz,  $\text{CDCl}_3$ ):  $\delta$  = 7.37-7.29 (m, 6H), 7.21-7.17 (m, 1H), 6.98 (t,  $J$  = 8.8 Hz, 2H), 6.52 (d,  $J$  = 2.0 Hz, 1H), 6.38 (d,  $J$  = 15.6 Hz, 1H), 6.07 (dd,  $J$  = 15.6, 8.6 Hz, 1H), 3.39 (d,  $J$  = 8.6 Hz, 1H), 2.77-2.67 (m, 2H), 2.29-2.25 (m, 1H), 2.08-2.01 (m, 1H), 1.72-1.67 (m, 1H), 1.31 (brs, 1H), 1.12 (s, 9H);  $^{13}\text{C}\{^1\text{H}\}$  NMR (101 MHz,  $\text{CDCl}_3$ ):  $\delta$  = 163.3 (d,  $J$  = 246.4 Hz), 149.3, 138.3, 133.8 (d,  $J$  = 3.0 Hz), 133.3, 129.2, 128.5, 128.3, 127.6 (d,  $J$  = 8.1 Hz), 126.2, 122.0, 115.6 (d,  $J$  = 21.8 Hz), 64.3, 51.5, 51.1, 30.7, 29.2, 28.5. HRMS (ESI<sup>+</sup>): calcd for  $\text{C}_{24}\text{H}_{29}\text{FN}$   $[\text{M}+\text{H}]^+$  350.2279, found 350.2281.

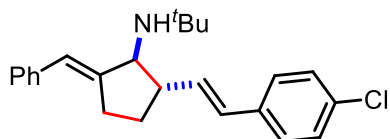

**(*Trans*)-2-((*E*)-benzylidene)-*N*-(*tert*-butyl)-5-((*E*)-4-chlorostyryl)cyclopentan-1-amine (*trans*-3ae)**

The title compound was prepared according to the general procedure as a yellow solid (36.2 mg, 99% yield).  $^1\text{H}$  NMR (400 MHz,  $\text{CDCl}_3$ ):  $\delta$  = 7.36-7.31 (m, 4H), 7.28-7.26 (m, 4H), 7.19 (t,  $J$  = 7.2 Hz, 1H), 6.52 (s, 1H), 6.38 (d,  $J$  = 15.6 Hz, 1H), 6.14 (dd,  $J$  = 15.6, 9.0 Hz, 1H), 3.38 (d,  $J$  = 9.0 Hz, 1H), 2.77-2.64 (m, 2H), 2.31-2.25 (m, 1H), 2.07-2.02 (m, 1H), 1.73-1.66 (m, 1H), 1.30 (brs, 1H), 1.12 (s, 9H);  $^{13}\text{C}\{^1\text{H}\}$  NMR (101 MHz,  $\text{CDCl}_3$ ):  $\delta$  = 149.3, 138.3, 136.2, 134.3, 132.6, 129.2, 128.8, 128.5, 128.3, 127.3, 126.2, 122.0, 64.4, 51.6, 51.1, 30.7, 29.2, 28.5. HRMS (ESI<sup>+</sup>): calcd for  $\text{C}_{24}\text{H}_{29}\text{ClN}$  [ $\text{M}+\text{H}$ ]<sup>+</sup> 366.1984, found 366.1999.

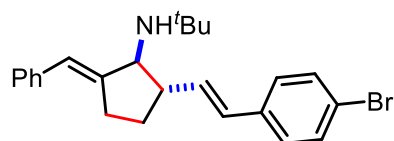

**(*Trans*)-2-((*E*)-benzylidene)-5-((*E*)-4-bromostyryl)-*N*-(*tert*-butyl)cyclopentan-1-amine (*trans*-3af)**

The title compound was prepared according to the general procedure as a yellow solid (40.6 mg, 99% yield).  $^1\text{H}$  NMR (600 MHz,  $\text{CDCl}_3$ ):  $\delta$  = 7.42 (d,  $J$  = 8.4 Hz, 2H), 7.36-7.31 (m, 4H), 7.22-7.17 (m, 3H), 6.51 (d,  $J$  = 1.2 Hz, 1H), 6.39 (d,  $J$  = 16.2 Hz, 1H), 6.16 (dd,  $J$  = 15.6, 9.0 Hz, 1H), 3.37 (d,  $J$  = 9.0 Hz, 1H), 2.77-2.65 (m, 2H), 2.29-2.26 (m, 1H), 2.06-2.03 (m, 1H), 1.71-1.68 (m, 1H), 1.12 (s, 9H);  $^{13}\text{C}\{^1\text{H}\}$  NMR (101 MHz,  $\text{CDCl}_3$ ):  $\delta$  = 149.3, 138.3, 136.6, 134.4, 131.7, 129.2, 128.5, 128.3, 127.6, 126.2, 122.0, 120.7, 64.4, 51.6, 51.1, 30.7, 29.2, 28.5. HRMS (ESI<sup>+</sup>): calcd for  $\text{C}_{24}\text{H}_{29}\text{BrN}$  [ $\text{M}+\text{H}$ ]<sup>+</sup> 410.1478, found 410.1486.

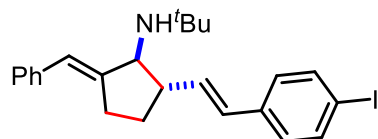

**(*Trans*)-2-((*E*)-benzylidene)-*N*-(*tert*-butyl)-5-((*E*)-4-iodostyryl)cyclopentan-1-amine (*trans*-3ag)**

The title compound was prepared according to the general procedure as a yellow solid (39.8 mg, 87% yield).  $^1\text{H}$  NMR (400 MHz,  $\text{CDCl}_3$ ):  $\delta$  = 7.60 (d,  $J$  = 8.4 Hz, 2H), 7.36-7.29 (m, 4H), 7.21-7.16 (m, 1H), 7.10 (d,  $J$  = 8.4 Hz, 2H), 6.51 (d,  $J$  = 1.6 Hz, 1H), 6.38 (d,  $J$  = 16.0 Hz, 1H), 6.17 (dd,  $J$  = 16.0, 8.8 Hz, 1H), 3.39 (d,  $J$  = 9.2 Hz, 1H), 2.78-2.64 (m, 2H), 2.29-2.25 (m, 1H), 2.08-2.01 (m, 1H), 1.74-1.66 (m, 1H), 1.11 (s, 9H);  $^{13}\text{C}\{^1\text{H}\}$  NMR (101 MHz,  $\text{CDCl}_3$ ):  $\delta$  = 149.3, 138.2, 137.7, 137.2, 134.6, 129.3, 128.5, 128.3, 127.9, 126.2, 122.0, 92.1, 64.3, 51.6, 51.1, 30.7, 29.2, 28.5. HRMS (ESI<sup>+</sup>): calcd for  $\text{C}_{24}\text{H}_{29}\text{IN}$  [ $\text{M}+\text{H}$ ]<sup>+</sup> 458.1340, found 458.1360.

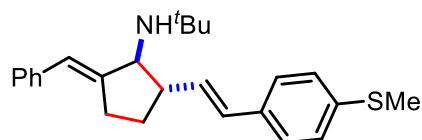

**(*Trans*)-2-((*E*)-benzylidene)-*N*-(*tert*-butyl)-5-((*E*)-4-(methylthio)styryl)cyclopentan-1-amine (*trans*-3ah)**

The title compound was prepared according to the general procedure as a yellow solid (26.4 mg, 70% yield).  $^1\text{H}$  NMR (600 MHz,  $\text{CDCl}_3$ ):  $\delta$  = 7.36-7.31 (m, 4H), 7.27 (d,  $J$  = 8.4 Hz, 2H), 7.20-7.17 (m, 3H), 6.52 (d,  $J$  = 1.8 Hz, 1H), 6.40 (d,  $J$  = 15.6 Hz, 1H), 6.12 (dd,  $J$  = 15.6, 9.0 Hz, 1H), 3.39 (d,  $J$  = 9.0 Hz, 1H), 2.75-2.65 (m, 2H), 2.47 (s, 3H), 2.31-2.28 (m, 1H), 2.06-2.03 (m, 1H), 1.73-1.66 (m, 1H), 1.47 (brs, 1H), 1.13 (s, 9H);  $^{13}\text{C}\{^1\text{H}\}$  NMR (101 MHz,  $\text{CDCl}_3$ ):  $\delta$  = 149.2, 138.3, 137.0, 134.7, 133.0, 129.8, 128.5, 128.3, 127.0, 126.5, 126.2, 122.1, 64.4, 51.5, 51.3, 30.6, 29.3, 28.5, 16.1. HRMS (ESI $^+$ ): calcd for  $\text{C}_{25}\text{H}_{32}\text{NS}$  [ $\text{M}+\text{H}$ ] $^+$  378.2250, found 378.2253.

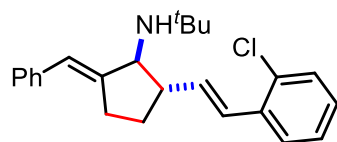

**(*Trans*)-2-((*E*)-benzylidene)-*N*-(*tert*-butyl)-5-((*E*)-2-chlorostyryl)cyclopentan-1-amine (*trans*-3ai)**

The title compound was prepared according to the general procedure as a yellow solid (23.4 mg, 64% yield).  $^1\text{H}$  NMR (600 MHz,  $\text{CDCl}_3$ ):  $\delta$  = 7.50 (d,  $J$  = 7.2 Hz, 1H), 7.36-7.32 (m, 5H), 7.21-7.13 (m, 3H), 6.81 (d,  $J$  = 15.6 Hz, 1H), 6.54 (s, 1H), 6.15 (dd,  $J$  = 15.6, 8.4 Hz, 1H), 3.39 (d,  $J$  = 9.0 Hz, 1H), 2.77-2.65 (m, 2H), 2.38-2.32 (m, 1H), 2.09-2.08 (m, 1H), 1.76-1.70 (m, 1H), 1.37 (brs, 1H), 1.13 (s, 9H);  $^{13}\text{C}\{^1\text{H}\}$  NMR (101 MHz,  $\text{CDCl}_3$ ):  $\delta$  = 149.2, 138.3, 136.4, 135.7, 132.7, 129.7, 128.5, 128.3, 128.1, 126.9, 126.8, 126.7, 126.2, 122.1, 64.3, 51.6, 51.1, 30.7, 29.2, 28.4. HRMS (ESI $^+$ ): calcd for  $\text{C}_{24}\text{H}_{29}\text{ClN}$  [ $\text{M}+\text{H}$ ] $^+$  366.1984, found 366.1991.

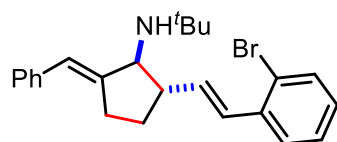

**(*Trans*)-2-((*E*)-benzylidene)-5-((*E*)-2-bromostyryl)-*N*-(*tert*-butyl)cyclopentan-1-amine (*trans*-3aj)**

The title compound was prepared according to the general procedure as a yellow solid (31.6 mg, 77% yield).  $^1\text{H}$  NMR (600 MHz,  $\text{CDCl}_3$ ):  $\delta$  = 7.54 (d,  $J$  = 8.4 Hz, 1H), 7.48

(d,  $J = 7.8$  Hz, 1H), 7.36-7.31 (m, 4H), 7.25-7.23 (m, 1H), 7.18 (t,  $J = 7.2$  Hz, 1H), 7.07 (t,  $J = 7.8$  Hz, 1H), 6.78 (d,  $J = 15.6$  Hz, 1H), 6.54 (s, 1H), 6.10 (dd,  $J = 15.6, 9.0$  Hz, 1H), 3.40 (d,  $J = 9.0$  Hz, 1H), 2.77-2.66 (m, 2H), 2.38-2.35 (m, 1H), 2.10-2.08 (m, 1H), 1.77-1.70 (m, 1H), 1.14 (s, 9H);  $^{13}\text{C}\{^1\text{H}\}$  NMR (101 MHz,  $\text{CDCl}_3$ ):  $\delta = 149.0, 138.3, 137.5, 136.5, 133.0, 129.5, 128.5, 128.4, 128.3, 127.5, 127.0, 126.2, 123.3, 122.2, 64.2, 51.4, 51.3, 30.6, 29.2, 28.4$ . HRMS (ESI<sup>+</sup>): calcd for  $\text{C}_{24}\text{H}_{29}\text{BrN}$  [ $\text{M}+\text{H}$ ]<sup>+</sup> 410.1478, found 410.1486.

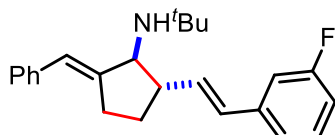

**(*Trans*)-2-((*E*)-benzylidene)-*N*-(*tert*-butyl)-5-((*E*)-3-fluorostyryl)cyclopentan-1-amine (*trans*-3ak)**

The title compound was prepared according to the general procedure as a yellow solid (24.8 mg, 71% yield).  $^1\text{H}$  NMR (600 MHz,  $\text{CDCl}_3$ ):  $\delta = 7.36$ -7.32 (m, 4H), 7.24-7.23 (m, 1H), 7.19 (t,  $J = 7.2$  Hz, 1H), 7.10 (d,  $J = 7.2$  Hz, 1H), 7.04 (d,  $J = 10.2$  Hz, 1H), 6.89 (t,  $J = 8.4$  Hz, 1H), 6.52 (s, 1H), 6.42 (d,  $J = 15.6$  Hz, 1H), 6.18 (dd,  $J = 15.6, 8.4$  Hz, 1H), 3.40 (d,  $J = 9.0$  Hz, 1H), 2.77-2.67 (m, 2H), 2.32-2.26 (m, 1H), 2.07-2.02 (m, 1H), 1.74-1.67 (m, 1H), 1.28 (brs, 1H), 1.13 (s, 9H);  $^{13}\text{C}\{^1\text{H}\}$  NMR (101 MHz,  $\text{CDCl}_3$ ):  $\delta = 164.5$  (d,  $J = 245.4$  Hz), 149.3, 140.1 (d,  $J = 8.1$  Hz), 138.3, 130.5, 130.1 (d,  $J = 8.1$  Hz), 129.3 (d,  $J = 2.0$  Hz), 128.5 (d,  $J = 20.2$  Hz), 128.3, 126.2, 122.0, 114.0 (d,  $J = 22.2$  Hz), 112.6 (d,  $J = 21.2$  Hz), 64.4, 51.5, 51.1, 30.7, 29.2, 28.5. HRMS (ESI<sup>+</sup>): calcd for  $\text{C}_{24}\text{H}_{29}\text{FN}$  [ $\text{M}+\text{H}$ ]<sup>+</sup> 350.2279, found 350.2280.

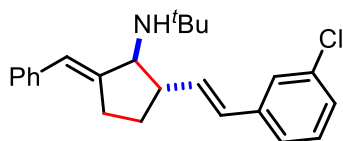

**(*Trans*)-2-((*E*)-benzylidene)-*N*-(*tert*-butyl)-5-((*E*)-3-chlorostyryl)cyclopentan-1-amine (*trans*-3al)**

The title compound was prepared according to the general procedure as a yellow solid (29.3 mg, 80% yield).  $^1\text{H}$  NMR (600 MHz,  $\text{CDCl}_3$ ):  $\delta = 7.36$ -7.31 (m, 5H), 7.22-7.16 (m, 4H), 6.52 (d,  $J = 2.4$  Hz, 1H), 6.37 (d,  $J = 15.6$  Hz, 1H), 6.18 (dd,  $J = 15.8, 9.0$  Hz, 1H), 3.40 (d,  $J = 9.0$  Hz, 1H), 2.77-2.66 (m, 2H), 2.32-2.30 (m, 1H), 2.08-2.03 (m, 1H), 1.73-1.66 (m, 1H), 1.13 (s, 9H);  $^{13}\text{C}\{^1\text{H}\}$  NMR (101 MHz,  $\text{CDCl}_3$ ):  $\delta = 149.2, 139.5, 138.2, 135.1, 134.6, 129.8, 129.1, 128.5, 128.3, 127.0, 126.2, 126.0, 124.3, 122.2, 64.4, 51.5, 51.2, 30.7, 29.2, 28.5$ . HRMS (ESI<sup>+</sup>): calcd for  $\text{C}_{24}\text{H}_{29}\text{ClN}$  [ $\text{M}+\text{H}$ ]<sup>+</sup> 366.1984, found 366.1987.

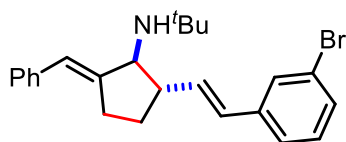

**(*Trans*)-2-((*E*)-benzylidene)-5-((*E*)-3-bromostyryl)-*N*-(*tert*-butyl)cyclopentan-1-amine (*trans*-3am)**

The title compound was prepared according to the general procedure as a yellow solid (37.3 mg, 91% yield).  $^1\text{H}$  NMR (600 MHz,  $\text{CDCl}_3$ ):  $\delta$  = 7.49 (s, 1H), 7.36-7.31 (m, 5H), 7.26-7.25 (m, 1H), 7.19-7.14 (m, 2H), 6.52 (d,  $J$  = 2.4 Hz, 1H), 6.38 (d,  $J$  = 15.6 Hz, 1H), 6.17 (dd,  $J$  = 15.6, 9.0 Hz, 1H), 3.40 (d,  $J$  = 8.4 Hz, 1H), 2.76-2.66 (m, 2H), 2.33-2.30 (m, 1H), 2.08-2.03 (m, 1H), 1.71-1.68 (m, 1H), 1.29 (brs, 1H), 1.13 (s, 9H);  $^{13}\text{C}\{^1\text{H}\}$  NMR (101 MHz,  $\text{CDCl}_3$ ):  $\delta$  = 149.1, 139.8, 138.2, 135.1, 130.1, 130.0, 129.0, 128.5, 128.3, 126.2, 124.7, 122.9, 122.3, 64.4, 51.5, 51.2, 30.6, 29.3, 28.5. HRMS (ESI $^+$ ): calcd for  $\text{C}_{24}\text{H}_{29}\text{BrN}$   $[\text{M}+\text{H}]^+$  410.1478, found 410.1493.

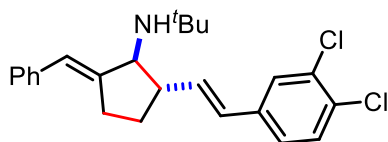

**(*Trans*)-2-((*E*)-benzylidene)-*N*-(*tert*-butyl)-5-((*E*)-3,4-dichlorostyryl)cyclopentan-1-amine (*trans*-3an)**

The title compound was prepared according to the general procedure as a yellow solid (24.0 mg, 60% yield).  $^1\text{H}$  NMR (400 MHz,  $\text{CDCl}_3$ ):  $\delta$  = 7.41 (d,  $J$  = 2.4 Hz, 1H), 7.36-7.31 (m, 5H), 7.21-7.15 (m, 2H), 6.50 (d,  $J$  = 2.4 Hz, 1H), 6.32 (d,  $J$  = 16.0 Hz, 1H), 6.17 (dd,  $J$  = 16.0, 8.8 Hz, 1H), 3.38 (d,  $J$  = 9.2 Hz, 1H), 2.75-2.65 (m, 2H), 2.31-2.27 (m, 1H), 2.08-2.00 (m, 1H), 1.35 (brs, 1H), 1.12 (s, 9H);  $^{13}\text{C}\{^1\text{H}\}$  NMR (101 MHz,  $\text{CDCl}_3$ ):  $\delta$  = 149.1, 138.2, 137.8, 135.8, 132.7, 130.6, 130.5, 128.5, 128.3, 128.1, 127.8, 126.2, 125.3, 122.1, 64.4, 51.7, 51.1, 30.7, 29.1, 28.5. HRMS (ESI $^+$ ): calcd for  $\text{C}_{24}\text{H}_{28}\text{Cl}_2\text{N}$   $[\text{M}+\text{H}]^+$  400.1594, found 400.1605.

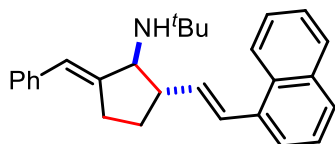

**(*Trans*)-2-((*E*)-benzylidene)-*N*-(*tert*-butyl)-5-((*E*)-2-(naphthalen-1-yl)vinyl)cyclopentan-1-amine (*trans*-3ao)**

The title compound was prepared according to the general procedure as a yellow solid (30.5 mg, 80% yield).  $^1\text{H}$  NMR (600 MHz,  $\text{CDCl}_3$ ):  $\delta$  = 8.14 (d,  $J$  = 7.8 Hz, 1H), 7.85

(d,  $J = 7.8$  Hz, 1H), 7.76 (d,  $J = 8.4$  Hz, 1H), 7.58 (d,  $J = 7.2$  Hz, 1H), 7.51-7.48 (m, 2H), 7.44 (t,  $J = 7.8$  Hz, 1H), 7.38 (d,  $J = 7.8$  Hz, 2H), 7.35 (t,  $J = 7.2$  Hz, 2H), 7.21-7.19 (m, 2H), 6.57 (s, 1H), 6.20 (dd,  $J = 15.0, 9.0$  Hz, 1H), 3.47 (d,  $J = 9.0$  Hz, 1H), 2.81-2.69 (m, 2H), 2.47-2.44 (m, 1H), 2.17-2.13 (m, 1H), 1.83-1.78 (m, 1H), 1.49 (brs, 1H), 1.17 (s, 9H);  $^{13}\text{C}\{^1\text{H}\}$  NMR (101 MHz,  $\text{CDCl}_3$ ):  $\delta = 149.4, 138.3, 136.6, 135.3, 131.2, 128.59, 128.56, 128.3, 127.63, 127.55, 126.2, 126.0, 125.79, 125.76, 123.9, 123.5, 122.1, 64.3, 51.9, 51.3, 30.7, 29.5, 28.5$ . HRMS (ESI<sup>+</sup>): calcd for  $\text{C}_{28}\text{H}_{32}\text{N}$   $[\text{M}+\text{H}]^+$  382.2530, found 382.2538.

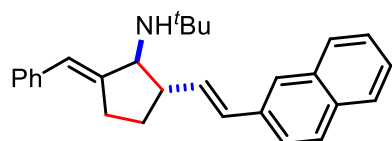

**(*Trans*)-2-((*E*)-benzylidene)-*N*-(*tert*-butyl)-5-((*E*)-2-(naphthalen-2-yl)vinyl)cyclopentan-1-amine (*trans*-3ap)**

The title compound was prepared according to the general procedure as a yellow solid (29.4 mg, 77% yield).  $^1\text{H}$  NMR (600 MHz,  $\text{CDCl}_3$ ):  $\delta = 7.79$ -7.76 (m, 3H), 7.70 (s, 1H), 7.58 (d,  $J = 9.6$  Hz, 1H), 7.45-7.25 (m, 6H), 7.20 (t,  $J = 7.2$  Hz, 1H), 6.63 (d,  $J = 15.6$  Hz, 1H), 6.56 (d,  $J = 1.8$  Hz, 1H), 6.30 (dd,  $J = 15.6, 9.0$  Hz, 1H), 3.46 (d,  $J = 8.4$  Hz, 1H), 2.80-2.69 (m, 2H), 2.40-2.37 (m, 1H), 2.13-2.09 (m, 1H), 1.79-1.73 (m, 1H), 1.15 (s, 9H);  $^{13}\text{C}\{^1\text{H}\}$  NMR (101 MHz,  $\text{CDCl}_3$ ):  $\delta = 149.2, 138.3, 135.1, 133.9, 133.8, 132.8, 130.6, 128.5, 128.3, 128.2, 128.0, 127.7, 126.3, 126.2, 125.69, 125.67, 123.6, 122.2, 64.5, 51.6, 51.3, 30.6, 29.4, 28.5$ .  $\text{C}_{28}\text{H}_{32}\text{N}$   $[\text{M}+\text{H}]^+$  382.2530, found 382.2538.

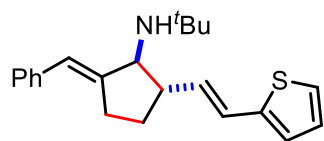

**(*Trans*)-2-((*E*)-benzylidene)-*N*-(*tert*-butyl)-5-((*E*)-2-(thiophen-2-yl)vinyl)cyclopentan-1-amine (*trans*-3aq)**

The title compound was prepared according to the general procedure as a brown solid (27.0 mg, 80% yield).  $^1\text{H}$  NMR (600 MHz,  $\text{CDCl}_3$ ):  $\delta = 7.36$ -7.31 (m, 4H), 7.19 (t,  $J = 7.2$  Hz, 1H), 7.10-7.09 (m, 1H), 6.95-6.93 (m, 1H), 6.89 (s, 1H), 6.57 (d,  $J = 15.6$  Hz, 1H), 6.51 (s, 1H), 6.00 (dd,  $J = 15.6, 7.2$  Hz, 1H), 3.37 (d,  $J = 8.4$  Hz, 1H), 2.75-2.64 (m, 2H), 2.27-2.25 (m, 1H), 2.06-2.02 (m, 1H), 1.72-1.67 (m, 1H), 1.47 (brs, 1H), 1.14 (s, 9H);  $^{13}\text{C}\{^1\text{H}\}$  NMR (101 MHz,  $\text{CDCl}_3$ ):  $\delta = 149.1, 142.9, 138.2, 133.4, 128.5, 128.3, 127.4, 126.2, 124.7, 123.7, 123.5, 122.1, 64.4, 51.3, 30.6, 29.1, 28.5$ . HRMS (ESI<sup>+</sup>): calcd for  $\text{C}_{22}\text{H}_{28}\text{NS}$   $[\text{M}+\text{H}]^+$  338.1937, found 338.1958.

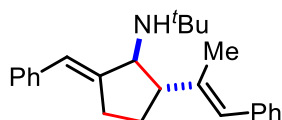

**(*Trans*)-2-((*E*)-benzylidene)-*N*-(*tert*-butyl)-5-((*E*)-1-phenylprop-1-en-2-yl)cyclopentan-1-amine (*trans*-3ar)**

The title compound was prepared according to the general procedure as a colorless solid (33.5 mg, 97% yield).  $^1\text{H}$  NMR (600 MHz,  $\text{CDCl}_3$ ):  $\delta$  = 7.35-7.31 (m, 6H), 7.26-7.25 (m, 2H), 7.20-7.17 (m, 2H), 6.59 (s, 1H), 6.37 (s, 1H), 3.48 (d,  $J$  = 9.6 Hz, 1H), 2.76-2.64 (m, 2H), 2.30-2.26 (m, 1H), 1.94-1.87 (m, 5H), 1.32 (brs, 1H), 1.11 (s, 9H);  $^{13}\text{C}\{^1\text{H}\}$  NMR (101 MHz,  $\text{CDCl}_3$ ):  $\delta$  = 149.7, 138.8, 138.5, 138.3, 129.0, 128.6, 128.22, 128.16, 127.8, 126.2, 126.0, 122.2, 61.5, 57.4, 50.9, 30.6, 28.3, 26.8, 14.8. HRMS ( $\text{ESI}^+$ ): calcd for  $\text{C}_{25}\text{H}_{32}\text{N}$   $[\text{M}+\text{H}]^+$  346.2530, found 346.2538.

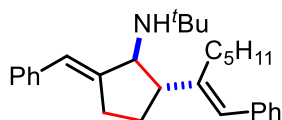

**(*Trans*)-2-((*E*)-benzylidene)-*N*-(*tert*-butyl)-5-((*E*)-1-phenylhept-1-en-2-yl)cyclopentan-1-amine (*trans*-3as)**

The title compound was prepared according to the general procedure as a yellow solid (20.5 mg, 51% yield).  $^1\text{H}$  NMR (400 MHz,  $\text{CDCl}_3$ ):  $\delta$  = 7.37-7.29 (m, 6H), 7.24-7.17 (m, 4H), 6.57 (d,  $J$  = 2.0 Hz, 1H), 6.30 (s, 1H), 3.51 (d,  $J$  = 8.4 Hz, 1H), 2.72-2.65 (m, 2H), 2.35-2.28 (m, 2H), 2.13-2.05 (m, 2H), 1.84-1.81 (m, 1H), 1.49-1.45 (m, 2H), 1.30-1.28 (m, 4H), 1.13 (s, 9H), 0.86 (t,  $J$  = 7.2 Hz, 3H);  $^{13}\text{C}\{^1\text{H}\}$  NMR (101 MHz,  $\text{CDCl}_3$ ):  $\delta$  = 150.0, 144.7, 138.5, 128.6, 128.3, 126.4, 126.12, 126.08, 122.4, 63.4, 55.2, 51.0, 32.4, 30.9, 30.6, 29.1, 28.6, 28.5, 22.5, 14.2. HRMS ( $\text{ESI}^+$ ): calcd for  $\text{C}_{29}\text{H}_{40}\text{N}$   $[\text{M}+\text{H}]^+$  402.3156, found 402.3166.

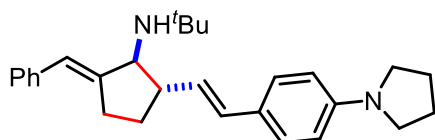

**(*Trans*)-2-((*E*)-benzylidene)-*N*-(*tert*-butyl)-5-((*E*)-4-(pyrrolidin-1-yl)styryl)cyclopentan-1-amine (*trans*-3av)**

The title compound was prepared according to the general procedure as a yellow solid (12.4 mg, 31% yield).  $^1\text{H}$  NMR (400 MHz,  $\text{CDCl}_3$ ):  $\delta$  = 7.38-7.29 (m, 5H), 7.23 (s, 1H), 7.18 (t,  $J$  = 7.2 Hz, 1H), 6.55 (s, 1H), 6.52 (d,  $J$  = 8.4 Hz, 1H), 6.38 (d,  $J$  = 15.6

Hz, 1H), 5.89 (dd,  $J = 15.6, 8.8$  Hz, 1H), 3.38 (d,  $J = 8.0$  Hz, 1H), 3.30-3.27 (m, 4H), 2.72-2.66 (m, 2H), 2.33-2.26 (m, 1H), 2.01 (m, 1H), 2.00-1.98 (m, 4H), 1.73-1.67 (m, 1H), 1.15 (s, 9H);  $^{13}\text{C}\{^1\text{H}\}$  NMR (101 MHz,  $\text{CDCl}_3$ ):  $\delta = 147.3, 138.4, 130.7, 128.6, 128.2, 128.0, 127.2, 125.1, 111.7, 64.4, 51.1, 47.7, 30.4, 29.6, 28.4, 25.6$ . HRMS (ESI<sup>+</sup>): calcd for  $\text{C}_{28}\text{H}_{37}\text{N}_2$  [M+H]<sup>+</sup> 401.2952, found 401.2955.

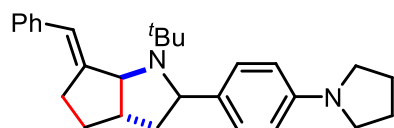

**(*Trans*)-6-((*E*)-benzylidene)-1-(*tert*-butyl)-2-(4-(pyrrolidin-1-yl)phenyl)octahydro cyclopenta[*b*]pyrrole (*trans*-3av')**

The title compound was prepared according to the general procedure as a yellow solid (16.4 mg, 41% yield).  $^1\text{H}$  NMR (400 MHz,  $\text{CDCl}_3$ ):  $\delta = 7.43$  (d,  $J = 7.6$  Hz, 2H), 7.37 (t,  $J = 7.6$  Hz, 2H), 7.27-7.25 (m, 2H), 7.19 (d,  $J = 7.2$  Hz, 1H), 6.87 (d,  $J = 2.0$  Hz, 1H), 6.47 (d,  $J = 8.4$  Hz, 2H), 4.16 (dd,  $J = 10.8, 6.8$  Hz, 1H), 3.96 (d,  $J = 7.6$  Hz, 1H), 3.26-3.22 (m, 4H), 2.74-2.65 (m, 2H), 2.48-2.43 (m, 1H), 2.11-2.05 (m, 1H), 1.97-1.91 (m, 6H), 1.63-1.58 (m, 1H), 1.06 (s, 9H);  $^{13}\text{C}\{^1\text{H}\}$  NMR (101 MHz,  $\text{CDCl}_3$ ):  $\delta = 149.7, 146.4, 139.2, 136.4, 128.6, 128.3, 127.5, 125.7, 124.3, 111.3, 70.0, 66.2, 54.9, 47.7, 44.4, 41.8, 28.3, 27.7, 25.6, 25.5$ . HRMS (ESI<sup>+</sup>): calcd for  $\text{C}_{28}\text{H}_{37}\text{N}_2$  [M+H]<sup>+</sup> 401.2952, found 401.2958.

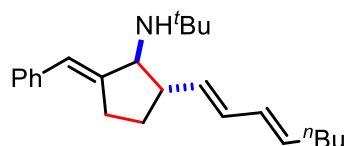

**(*Trans*)-2-((*E*)-benzylidene)-*N*-(*tert*-butyl)-5-((1*E*,3*E*)-octa-1,3-dien-1-yl)cyclopentan-1-amine (*trans*-3aw)**

The title compound was prepared according to the general procedure as a yellow solid (29.7 mg, 88% yield).  $^1\text{H}$  NMR (400 MHz,  $\text{CDCl}_3$ ):  $\delta = 7.37$ -7.29 (m, 4H), 7.17 (d,  $J = 6.8$  Hz, 1H), 6.51 (t,  $J = 2.0$  Hz, 1H), 6.09-5.97 (m, 2H), 5.61 (dt,  $J = 14.4, 7.2$  Hz, 1H), 5.49 (dd,  $J = 14.4, 8.8$  Hz, 1H), 3.31 (d,  $J = 8.4$  Hz, 1H), 2.68-2.62 (m, 2H), 2.19-2.17 (m, 1H), 2.08-1.99 (m, 3H), 1.63-1.58 (m, 1H), 1.40-1.36 (m, 2H), 1.31-1.25 (m, 5H), 1.14 (s, 9H), 0.88 (t,  $J = 6.4$  Hz, 3H);  $^{13}\text{C}\{^1\text{H}\}$  NMR (101 MHz,  $\text{CDCl}_3$ ):  $\delta = 138.3, 134.3, 133.6, 131.2, 130.1, 128.5, 128.2, 126.1, 122.1, 64.4, 50.7, 32.7, 31.5, 30.5, 29.4, 29.1, 28.4, 22.6, 14.2$ . HRMS (ESI<sup>+</sup>): calcd for  $\text{C}_{24}\text{H}_{36}\text{N}$  [M+H]<sup>+</sup> 338.2843, found 338.2845.

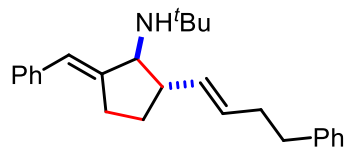

**(*Trans*)-2-((*E*)-benzylidene)-*N*-(*tert*-butyl)-5-((*E*)-4-phenylbut-1-en-1-yl)cyclopentan-1-amine (*trans*-3ax)**

The title compound was prepared according to the general procedure as a yellow solid (30.9 mg, 86% yield).  $^1\text{H}$  NMR (400 MHz,  $\text{CDCl}_3$ ):  $\delta$  = 7.35-7.27 (m, 7H), 7.18-7.16 (m, 3H), 6.50 (t,  $J$  = 2.4 Hz, 1H), 5.56-5.49 (m, 1H), 5.37 (dd,  $J$  = 15.2, 8.4 Hz, 1H), 3.24 (d,  $J$  = 8.8 Hz, 1H), 2.71-2.61 (m, 4H), 2.37-2.32 (m, 2H), 2.13-2.06 (m, 1H), 2.00-1.92 (m, 1H), 1.62-1.54 (m, 1H), 1.12 (s, 9H);  $^{13}\text{C}\{^1\text{H}\}$  NMR (101 MHz,  $\text{CDCl}_3$ ):  $\delta$  = 151.5, 142.1, 138.4, 133.6, 130.6, 128.5, 128.4, 128.2, 126.1, 125.9, 121.9, 64.1, 53.2, 50.4, 36.1, 34.6, 30.5, 19.3, 28.3. HRMS (ESI $^+$ ): calcd for  $\text{C}_{26}\text{H}_{34}\text{N}$  [ $\text{M}+\text{H}$ ] $^+$  360.2686, found 360.2680.

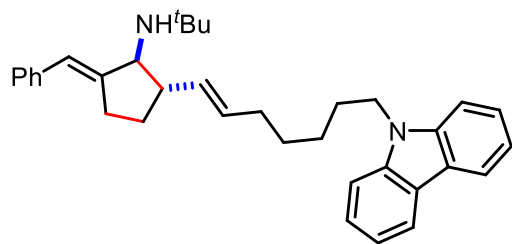

**(*Trans*)-2-((*E*)-7-(9*H*-carbazol-9-yl)hept-1-en-1-yl)-5-((*E*)-benzylidene)-*N*-(*tert*-butyl)cyclopentan-1-amine (*trans*-3ay)**

The title compound was prepared according to the general procedure as a yellow solid (44.2 mg, 90% yield).  $^1\text{H}$  NMR (400 MHz,  $\text{CDCl}_3$ ):  $\delta$  = 8.11 (d,  $J$  = 8.0 Hz, 2H), 7.49-7.46 (m, 2H), 7.42 (d,  $J$  = 8.0 Hz, 2H), 7.35-7.31 (m, 4H), 7.26-7.22 (m, 2H), 7.19 (t,  $J$  = 6.8 Hz, 1H), 6.52 (s, 1H), 5.49-5.42 (m, 1H), 5.32 (dd,  $J$  = 15.2, 8.4 Hz, 1H), 4.30 (t,  $J$  = 7.2 Hz, 2H), 3.23 (d,  $J$  = 9.2 Hz, 1H), 2.68-2.61 (m, 2H), 2.07-1.87 (m, 6H), 1.57-1.52 (m, 1H), 1.43-1.42 (m, 4H), 1.14 (brs, 1H), 1.14 (s, 9H);  $^{13}\text{C}\{^1\text{H}\}$  NMR (101 MHz,  $\text{CDCl}_3$ ):  $\delta$  = 149.6, 140.5, 138.5, 133.3, 131.1, 128.5, 128.3, 126.0, 125.7, 122.9, 121.7, 120.5, 118.8, 108.7, 64.0, 51.1, 50.7, 43.1, 32.5, 30.7, 29.4, 29.3, 29.0, 28.3, 27.0. HRMS (ESI $^+$ ): calcd for  $\text{C}_{35}\text{H}_{43}\text{N}_2$  [ $\text{M}+\text{H}$ ] $^+$  491.3421, found 491.3431.

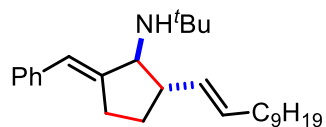

**(*Trans*)-2-((*E*)-benzylidene)-*N*-(*tert*-butyl)-5-((*E*)-undec-1-en-1-yl)cyclopentan-1-amine (*trans*-3az)**

The title compound was prepared according to the general procedure as a yellow oil (34.7 mg, 91% yield).  $^1\text{H}$  NMR (600 MHz,  $\text{CDCl}_3$ ):  $\delta$  = 7.34-7.29 (m, 4H), 7.16 (t,  $J$  = 7.8 Hz, 1H), 6.50 (s, 1H), 5.50-5.45 (m, 1H), 5.35-5.31 (m, 1H), 3.20 (d,  $J$  = 9.6 Hz, 1H), 2.66-2.58 (m, 2H), 2.05-1.99 (m, 3H), 1.96-1.92 (m, 1H), 1.60-1.56 (m, 1H), 1.38-1.27 (m, 14H), 1.23 (s, 9H), 0.87 (t,  $J$  = 7.2 Hz, 3H);  $^{13}\text{C}\{^1\text{H}\}$  NMR (101 MHz,  $\text{CDCl}_3$ ):  $\delta$  = 149.7, 138.5, 132.8, 131.9, 128.5, 128.2, 126.0, 121.6, 63.9, 51.1, 50.7, 32.7, 32.0, 30.6, 29.6, 29.34, 29.29, 28.2, 22.8, 14.2. HRMS (ESI<sup>+</sup>): calcd for  $\text{C}_{27}\text{H}_{44}\text{N}$   $[\text{M}+\text{H}]^+$  382.3469, found 382.3475.

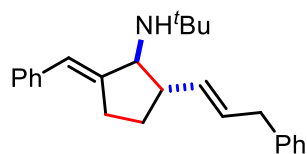

**(*Trans*)-2-((*E*)-benzylidene)-*N*-(*tert*-butyl)-5-((*E*)-3-phenylprop-1-en-1-yl)cyclopentan-1-amine (*trans*-3aaa)**

The title compound was prepared according to the general procedure as a yellow solid (32.1 mg, 93% yield).  $^1\text{H}$  NMR (600 MHz,  $\text{CDCl}_3$ ):  $\delta$  = 7.34-7.26 (m, 6H), 7.21-7.17 (m, 4H), 6.50 (d,  $J$  = 2.0 Hz, 1H), 5.69-5.62 (m, 1H), 5.44 (dd,  $J$  = 15.2, 8.6 Hz, 1H), 3.37 (d,  $J$  = 6.4 Hz, 2H), 3.24 (d,  $J$  = 9.2 Hz, 1H), 2.67-2.60 (m, 2H), 2.13-2.09 (m, 1H), 2.00-1.93 (m, 1H), 1.67-1.58 (m, 1H), 1.38 (brs, 1H), 1.12 (s, 9H);  $^{13}\text{C}\{^1\text{H}\}$  NMR (101 MHz,  $\text{CDCl}_3$ ):  $\delta$  = 149.6, 140.8, 138.4, 134.5, 130.0, 128.6, 128.50, 128.45, 128.2, 126.0, 121.7, 64.0, 51.1, 50.6, 39.1, 30.7, 29.1, 28.3. HRMS (ESI<sup>+</sup>): calcd for  $\text{C}_{25}\text{H}_{32}\text{N}$   $[\text{M}+\text{H}]^+$  346.2530, found 346.2513.

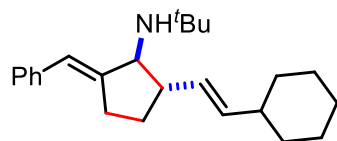

**(*Trans*)-2-((*E*)-benzylidene)-*N*-(*tert*-butyl)-5-((*E*)-2-cyclohexylvinyl)cyclopentan-1-amine (*trans*-3aab)**

The title compound was prepared according to the general procedure as a yellow oil (26.3 mg, 78% yield).  $^1\text{H}$  NMR (400 MHz,  $\text{CDCl}_3$ ):  $\delta$  = 7.34-7.28 (m, 4H), 7.16 (t,  $J$  = 8.4 Hz, 1H), 6.51 (d,  $J$  = 2.4 Hz, 1H), 5.43 (dd,  $J$  = 15.4, 6.4 Hz, 1H), 5.28 (dd,  $J$  = 15.4, 8.5 Hz, 1H), 3.19 (d,  $J$  = 9.2 Hz, 1H), 2.66-2.59 (m, 2H), 2.03-2.01 (m, 3H), 1.96-1.72 (m, 4H), 1.69-1.58 (m, 2H), 1.28-1.18 (m, 3H), 1.13 (s, 9H), 1.08-1.05 (m, 2H);  $^{13}\text{C}\{^1\text{H}\}$  NMR (101 MHz,  $\text{CDCl}_3$ ):  $\delta$  = 149.6, 138.5, 137.8, 130.2, 128.5, 128.2,

126.0, 121.6, 63.9, 51.1, 50.1, 40.8, 33.2, 30.7, 29.3, 28.2, 26.3, 26.2. HRMS (ESI<sup>+</sup>): calcd for C<sub>24</sub>H<sub>36</sub>N [M+H]<sup>+</sup> 338.2843, found 338.2827.

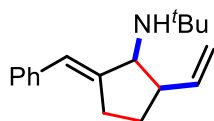

**(Cis)-2-((E)-benzylidene)-N-(tert-butyl)-5-vinylcyclopentan-1-amine (cis-3aac)**

The title compound was prepared according to the general procedure as a yellow solid (12.0 mg, 47% yield). <sup>1</sup>H NMR (400 MHz, CDCl<sub>3</sub>): δ = 7.38 (t, *J* = 7.2 Hz, 2H), 7.31 (t, *J* = 8.0 Hz, 2H), 7.15 (t, *J* = 7.2 Hz, 1H), 6.56 (d, *J* = 2.4 Hz, 1H), 5.60-5.50 (m, 1H), 5.10-5.04 (m, 2H), 3.61 (d, *J* = 8.0 Hz, 1H), 2.69-2.64 (m, 3H), 1.95-1.92 (m, 1H), 1.91-1.77 (m, 1H), 1.14 (s, 9H); <sup>13</sup>C{<sup>1</sup>H} NMR (101 MHz, CDCl<sub>3</sub>): δ = 147.6, 138.6, 138.1, 128.4, 128.2, 125.8, 122.1, 117.1, 61.5, 50.8, 48.3, 30.5, 28.0, 27.1. HRMS (ESI<sup>+</sup>): calcd for C<sub>18</sub>H<sub>26</sub>N [M+H]<sup>+</sup> 256.2060, found 256.2070.

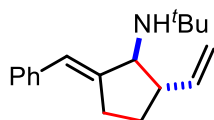

**(Trans)-2-((E)-benzylidene)-N-(tert-butyl)-5-vinylcyclopentan-1-amine**

**(trans-3aac)**

The title compound was prepared according to the general procedure as a yellow solid (4.1 mg, 16% yield). <sup>1</sup>H NMR (400 MHz, CDCl<sub>3</sub>): δ = 7.35-7.29 (m, 4H), 7.19-7.17 (m, 1H), 6.51 (d, *J* = 2.4 Hz, 1H), 5.82-5.73 (m, 1H), 5.10-5.03 (m, 2H), 3.28 (d, *J* = 9.2 Hz, 1H), 2.68-2.62 (m, 2H), 2.14-2.10 (m, 1H), 2.01-1.94 (m, 1H), 1.66-1.61 (m, 1H), 1.14 (s, 9H); <sup>13</sup>C{<sup>1</sup>H} NMR (101 MHz, CDCl<sub>3</sub>): δ = 149.5, 141.5, 138.4, 128.5, 128.3, 126.1, 121.9, 115.3, 63.9, 51.9, 51.0, 30.7, 28.9, 28.3. HRMS (ESI<sup>+</sup>): calcd for C<sub>18</sub>H<sub>26</sub>N [M+H]<sup>+</sup> 256.2060, found 256.2070.

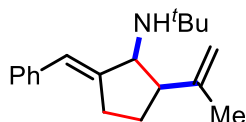

**(Cis)-2-((E)-benzylidene)-N-(tert-butyl)-5-(prop-1-en-2-yl)cyclopentan-1-amine**

**(cis-3aad)**

The title compound was prepared according to the general procedure as a yellow solid (9.6 mg, 36% yield). <sup>1</sup>H NMR (400 MHz, CDCl<sub>3</sub>): δ = 7.35-7.29 (m, 4H), 7.15 (t, *J* = 7.2 Hz, 1H), 6.58 (s, 1H), 4.86 (s, 1H), 4.68 (s, 1H), 3.63 (d, *J* = 6.0 Hz, 1H), 2.73-2.63 (m, 3H), 1.93-1.91 (m, 2H), 1.62 (s, 3H), 1.42 (brs, 1H), 1.12 (s, 9H);

$^{13}\text{C}\{^1\text{H}\}$  NMR (101 MHz,  $\text{CDCl}_3$ ):  $\delta$  = 149.6, 145.6, 138.8, 125.8, 128.2, 125.8, 121.4, 113.2, 60.8, 50.7, 50.3, 30.3, 27.7, 26.8, 22.4. HRMS (ESI<sup>+</sup>): calcd for  $\text{C}_{19}\text{H}_{28}\text{N}$   $[\text{M}+\text{H}]^+$  270.2217, found 270.2219.

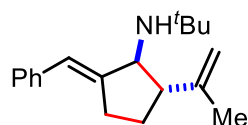

**(*Trans*)-2-((*E*)-benzylidene)-*N*-(*tert*-butyl)-5-(prop-1-en-2-yl)cyclopentan-1-amine (*trans*-3aad)**

The title compound was prepared according to the general procedure as a yellow solid (3.2 mg, 12% yield).  $^1\text{H}$  NMR (400 MHz,  $\text{CDCl}_3$ ):  $\delta$  = 7.32-7.29 (m, 4H), 7.17-7.15 (m, 1H), 6.54 (s, 1H), 4.81-4.77 (m, 2H), 3.40 (d,  $J$  = 8.4 Hz, 1H), 2.69-2.61 (m, 2H), 2.20-2.18 (m, 1H), 1.91-1.88 (m, 1H), 1.79-1.74 (m, 4H), 1.39 (brs, 1H), 1.12 (s, 9H);  $^{13}\text{C}\{^1\text{H}\}$  NMR (101 MHz,  $\text{CDCl}_3$ ):  $\delta$  = 149.9, 146.1, 138.5, 128.5, 128.2, 126.0, 122.3, 112.7, 61.9, 54.8, 50.8, 30.5, 28.2, 27.0, 19.5. HRMS (ESI<sup>+</sup>): calcd for  $\text{C}_{19}\text{H}_{28}\text{N}$   $[\text{M}+\text{H}]^+$  270.2217, found 270.2219.

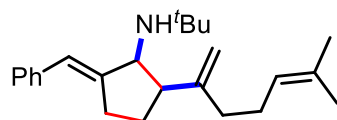

**(*Cis*)-2-((*E*)-benzylidene)-*N*-(*tert*-butyl)-5-(6-methylhepta-1,5-dien-2-yl)cyclopentan-1-amine (*cis*-3aae)**

The title compound was prepared according to the general procedure as a yellow solid (total: 10.8 mg, 32% yield, d.r. = 2:1). (*Cis*):  $^1\text{H}$  NMR (400 MHz,  $\text{CDCl}_3$ ):  $\delta$  = 7.36-7.29 (m, 4H), 7.16 (t,  $J$  = 7.2 Hz, 1H), 6.55 (d,  $J$  = 2.0 Hz, 1H), 5.12-5.08 (m, 1H), 4.91 (s, 1H), 4.75 (s, 1H), 3.64 (d,  $J$  = 6.0 Hz, 1H), 2.76-2.69 (m, 1H), 2.62-2.60 (m, 2H), 2.14-2.10 (m, 2H), 2.01-1.97 (m, 3H), 1.86-1.81 (m, 1H), 1.67 (s, 3H), 1.60 (s, 3H), 1.11 (s, 9H);  $^{13}\text{C}\{^1\text{H}\}$  NMR (101 MHz,  $\text{CDCl}_3$ ):  $\delta$  = 150.0, 148.6, 138.7, 131.8, 128.4, 128.2, 125.8, 124.2, 121.8, 111.3, 61.0, 50.7, 49.2, 36.7, 30.4, 27.6, 27.3, 26.4, 25.8, 17.9. HRMS (ESI<sup>+</sup>): calcd for  $\text{C}_{24}\text{H}_{36}\text{N}$   $[\text{M}+\text{H}]^+$  338.2843, found 338.2845.

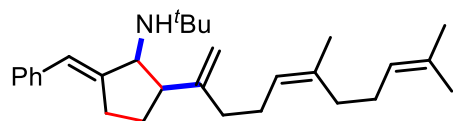

**(Cis)-2-((E)-benzylidene)-N-(tert-butyl)-5-((Z)-6,10-dimethylundeca-1,5,9-trien-2-yl)cyclopentan-1-amine (cis-3aaf)**

The title compound was prepared according to the general procedure as a yellow solid (7.3 mg, 18% yield).  $^1\text{H}$  NMR (400 MHz,  $\text{CDCl}_3$ ):  $\delta$  = 7.36-7.29 (m, 4H), 7.16 (t,  $J$  = 6.8 Hz, 1H), 6.56 (s, 1H), 5.12-5.06 (m, 2H), 4.91 (s, 1H), 4.75 (s, 1H), 3.66 (d,  $J$  = 6.0 Hz, 1H), 2.79-2.59 (m, 3H), 2.16-2.11 (m, 2H), 2.06-1.95 (m, 7H), 1.89-1.81 (m, 1H), 1.67 (s, 3H), 1.59 (s, 6H), 1.12 (s, 9H);  $^{13}\text{C}\{^1\text{H}\}$  NMR (101 MHz,  $\text{CDCl}_3$ ):  $\delta$  = 148.5, 143.2, 138.7, 135.4, 131.4, 128.4, 128.2, 125.8, 124.4, 124.0, 121.8, 111.3, 61.0, 50.7, 49.2, 39.8, 36.7, 30.4, 27.6, 27.3, 26.8, 26.3, 25.8, 17.8, 16.2. HRMS (ESI<sup>+</sup>): calcd for  $\text{C}_{29}\text{H}_{44}\text{N}$  [ $\text{M}+\text{H}$ ]<sup>+</sup> 406.3469, found 406.3478.

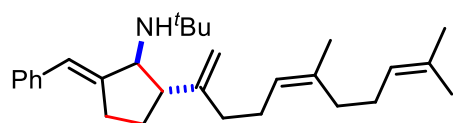

**(Trans)-2-((E)-benzylidene)-N-(tert-butyl)-5-((Z)-6,10-dimethylundeca-1,5,9-trien-2-yl)cyclopentan-1-amine (trans-3aaf)**

The title compound was prepared according to the general procedure as a yellow solid (7.3 mg, 18% yield).  $^1\text{H}$  NMR (400 MHz,  $\text{CDCl}_3$ ):  $\delta$  = 7.33-7.29 (m, 4H), 7.18-7.15 (m, 1H), 6.53 (d,  $J$  = 2.0 Hz, 1H), 5.16 (t,  $J$  = 8.0 Hz, 1H), 5.12-5.08 (m, 1H), 4.84 (d,  $J$  = 9.6 Hz, 2H), 3.46 (d,  $J$  = 8.0 Hz, 1H), 2.67-2.61 (m, 2H), 2.23-2.14 (m, 2H), 2.08-2.05 (m, 5H), 2.00-1.97 (m, 4H), 1.68 (s, 3H), 1.60 (s, 6H), 1.12 (s, 9H);  $^{13}\text{C}\{^1\text{H}\}$  NMR (101 MHz,  $\text{CDCl}_3$ ):  $\delta$  = 150.4, 150.2, 138.4, 135.4, 131.5, 128.5, 128.2, 126.1, 124.4, 124.1, 122.4, 110.5, 62.9, 54.1, 51.0, 39.8, 33.9, 30.5, 28.4, 27.9, 26.9, 26.8, 25.8, 17.8, 16.1. HRMS (ESI<sup>+</sup>): calcd for  $\text{C}_{29}\text{H}_{44}\text{N}$  [ $\text{M}+\text{H}$ ]<sup>+</sup> 406.3469, found 406.3480.

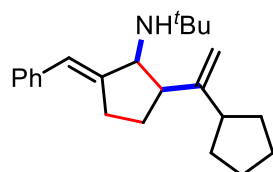

**(Cis)-2-((E)-benzylidene)-N-(tert-butyl)-5-(1-cyclopentylvinyl)cyclopentan-1-amine (cis-3aag)**

The title compound was prepared according to the general procedure as a yellow solid (6.7 mg, 19% yield).  $^1\text{H}$  NMR (400 MHz,  $\text{CDCl}_3$ ):  $\delta$  = 7.36-7.29 (m, 4H), 7.17-7.14 (m, 1H), 6.56 (s, 1H), 4.94 (s, 1H), 4.69 (s, 1H), 3.66 (s, 1H), 2.76-2.53 (m, 3H), 2.36-2.29 (m, 1H), 2.00-1.93 (m, 1H), 1.85-1.77 (m, 3H), 1.71-1.66 (m, 2H), 1.59-1.55 (m, 3H), 1.42-1.35 (m, 2H), 1.13 (brs, 1H), 1.13 (s, 9H);  $^{13}\text{C}\{^1\text{H}\}$  NMR

(101 MHz, CDCl<sub>3</sub>):  $\delta$  = 152.0, 138.7, 129.9, 128.4, 128.2, 127.8, 125.8, 108.9, 65.2, 61.1, 48.5, 47.3, 32.4, 31.7, 30.5, 30.4, 28.1, 27.5, 24.9. HRMS (ESI<sup>+</sup>): calcd for C<sub>23</sub>H<sub>34</sub>N [M+H]<sup>+</sup> 324.2686, found 324.2680.

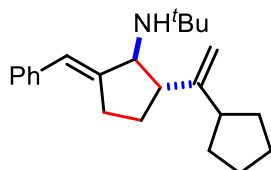

**(*Trans*)-2-((*E*)-benzylidene)-*N*-(*tert*-butyl)-5-(1-cyclopentylvinyl)cyclopentan-1-amine (*trans*-3aag)**

The title compound was prepared according to the general procedure as a yellow solid (6.7 mg, 19% yield). <sup>1</sup>H NMR (400 MHz, CDCl<sub>3</sub>):  $\delta$  = 7.34-7.29 (m, 4H), 7.19-7.15 (m, 1H), 6.52 (d, *J* = 2.0 Hz, 1H), 6.87 (s, 1H), 6.74 (s, 1H), 3.54 (d, *J* = 6.4 Hz, 1H), 2.66-2.60 (m, 3H), 2.45-2.41 (m, 1H), 2.30-2.24 (m, 1H), 2.06-2.01 (m, 1H), 1.88-1.65 (m, 7H), 1.59-1.55 (m, 3H), 1.13 (s, 9H); <sup>13</sup>C{<sup>1</sup>H} NMR (101 MHz, CDCl<sub>3</sub>):  $\delta$  = 155.5, 150.8, 138.4, 128.5, 128.3, 126.1, 122.7, 107.4, 63.9, 52.9, 51.0, 45.7, 33.3, 32.0, 30.6, 30.0, 28.6, 25.2. HRMS (ESI<sup>+</sup>): calcd for C<sub>23</sub>H<sub>34</sub>N [M+H]<sup>+</sup> 324.2686, found 324.2692.

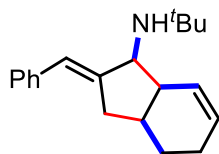

**(*Cis*)-2-((*E*)-benzylidene)-*N*-(*tert*-butyl)-2,3,3a,4,5,7a-hexahydro-1*H*-inden-1-amine (*cis*-3aah)**

The title compound was prepared according to the general procedure as a yellow solid (11.3 mg, 40% yield). <sup>1</sup>H NMR (400 MHz, CDCl<sub>3</sub>):  $\delta$  = 7.33-7.31 (m, 4H), 7.20-7.15 (m, 1H), 6.42-6.41 (m, 1H), 5.74 (s, 2H), 3.42 (d, *J* = 6.4 Hz, 1H), 2.86-2.80 (m, 1H), 2.42-2.36 (m, 2H), 2.20-2.17 (m, 1H), 2.07-2.01 (m, 2H), 1.72-1.67 (m, 1H), 1.58-1.51 (m, 1H), 1.17 (s, 9H); <sup>13</sup>C{<sup>1</sup>H} NMR (101 MHz, CDCl<sub>3</sub>):  $\delta$  = 150.7, 138.3, 128.9, 128.5, 128.3, 127.5, 126.2, 122.6, 64.2, 51.0, 47.1, 34.6, 34.2, 30.6, 25.6, 23.3. HRMS (ESI<sup>+</sup>): calcd for C<sub>20</sub>H<sub>28</sub>N [M+H]<sup>+</sup> 282.2217, found 282.2219.

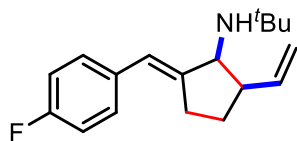

**(*Cis*)-*N*-(*tert*-butyl)-2-((*E*)-4-fluorobenzylidene)-5-vinylcyclopentan-1-amine (*cis*-3cac)**

The title compound was prepared according to the general procedure as a yellow oil (total: 17.0 mg, 62% yield, d.r. = 9:1). (*Cis*):  $^1\text{H}$  NMR (400 MHz,  $\text{CDCl}_3$ ):  $\delta$  = 7.34-7.30 (m, 2H), 7.00 (t,  $J$  = 8.8 Hz, 2H), 6.53 (d,  $J$  = 2.4 Hz, 1H), 5.58-5.49 (m, 1H), 5.11-5.05 (m, 2H), 3.62 (d,  $J$  = 4.8 Hz, 1H), 2.71-2.60 (m, 3H), 1.97-1.90 (m, 1H), 1.83-1.77 (m, 2H), 1.14 (s, 9H);  $^{13}\text{C}\{^1\text{H}\}$  NMR (101 MHz,  $\text{CDCl}_3$ ):  $\delta$  = 162.3 (d,  $J$  = 246.4 Hz), 147.1 (d,  $J$  = 1.0 Hz), 137.9, 134.8 (d,  $J$  = 3.0 Hz), 129.9 (d,  $J$  = 8.1 Hz), 121.1, 117.2, 115.1 (d,  $J$  = 21.2 Hz), 61.4, 50.8, 48.3, 30.5, 28.0, 26.9. HRMS (ESI<sup>+</sup>): calcd for  $\text{C}_{18}\text{H}_{25}\text{FN}$  [ $\text{M}+\text{H}$ ]<sup>+</sup> 274.1966, found 274.1960.

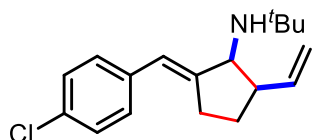

**(*Cis*)-*N*-(*tert*-butyl)-2-((*E*)-4-chlorobenzylidene)-5-vinylcyclopentan-1-amine**

**(*cis*-3dac)**

The title compound was prepared according to the general procedure as a yellow solid (20.3mg, 70% yield).  $^1\text{H}$  NMR (400 MHz,  $\text{CDCl}_3$ ):  $\delta$  = 7.32-7.23 (m, 4H), 6.53 (d,  $J$  = 2.4 Hz, 1H), 5.57-5.05 (m, 2H), 3.59 (d,  $J$  = 8.0 Hz, 1H), 2.71-2.61 (m, 3H), 1.97-1.87 (m, 1H), 1.82-1.76 (m, 1H), 1.14 (s, 9H);  $^{13}\text{C}\{^1\text{H}\}$  NMR (101 MHz,  $\text{CDCl}_3$ ):  $\delta$  = 148.5, 137.8, 137.1, 131.3, 129.6, 128.3, 121.1, 117.4, 61.5, 50.8, 48.3, 30.5, 27.9, 27.0. HRMS (ESI<sup>+</sup>): calcd for  $\text{C}_{18}\text{H}_{25}\text{ClN}$  [ $\text{M}+\text{H}$ ]<sup>+</sup> 290.1671, found 290.1665.

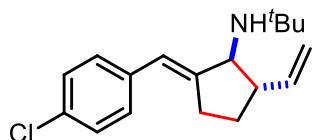

**(*Trans*)-*N*-(*tert*-butyl)-2-((*E*)-4-chlorobenzylidene)-5-vinylcyclopentan-1-amine**

**(*trans*-3dac)**

The title compound was prepared according to the general procedure as a yellow solid (2.3mg, 8% yield).  $^1\text{H}$  NMR (400 MHz,  $\text{CDCl}_3$ ):  $\delta$  = 7.30-7.23 (m, 4H), 6.46 (d,  $J$  = 2.4 Hz, 1H), 5.80-5.71 (m, 1H), 5.09-5.03 (m, 2H), 3.28 (d,  $J$  = 9.2 Hz, 1H), 2.63-2.56 (m, 2H), 1.99-1.93 (m, 1H), 1.66-1.61 (m, 1H), 1.12 (brs, 1H), 1.12 (s, 9H);  $^{13}\text{C}\{^1\text{H}\}$  NMR (101 MHz,  $\text{CDCl}_3$ ):  $\delta$  = 150.3, 141.3, 136.8, 131.6, 129.7, 128.4, 120.8, 115.6, 63.8, 51.8, 51.0, 30.7, 28.8, 28.2. HRMS (ESI<sup>+</sup>): calcd for  $\text{C}_{18}\text{H}_{25}\text{ClN}$  [ $\text{M}+\text{H}$ ]<sup>+</sup> 290.1671, found 290.1673.

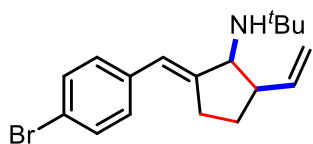

**(Cis)-2-((E)-4-bromobenzylidene)-N-(tert-butyl)-5-vinylcyclopentan-1-amine**

**(cis-3eac)**

The title compound was prepared according to the general procedure as a yellow solid (23.4 mg, 70% yield).  $^1\text{H}$  NMR (400 MHz,  $\text{CDCl}_3$ ):  $\delta$  = 7.43 (d,  $J$  = 8.4 Hz, 2H), 7.21 (d,  $J$  = 8.4 Hz, 2H), 6.51 (d,  $J$  = 2.4 Hz, 1H), 5.56-5.47 (m, 1H), 5.11-5.04 (m, 2H), 3.60 (d,  $J$  = 6.0 Hz, 1H), 2.71-2.59 (m, 3H), 1.95-1.90 (m, 1H), 1.82-1.76 (m, 1H), 1.13 (brs, 3H), 1.13 (s, 9H);  $^{13}\text{C}\{^1\text{H}\}$  NMR (101 MHz,  $\text{CDCl}_3$ ):  $\delta$  = 148.7, 137.8, 137.5, 131.3, 130.0, 121.2, 119.5, 117.4, 61.6, 50.8, 48.3, 30.5, 27.9, 27.0. HRMS (ESI<sup>+</sup>): calcd for  $\text{C}_{18}\text{H}_{25}\text{BrN}$  [ $\text{M}+\text{H}$ ]<sup>+</sup> 334.1165, found 334.1155.

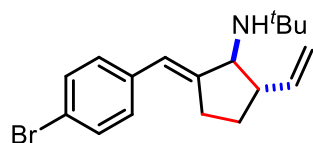

**(Trans)-2-((E)-4-bromobenzylidene)-N-(tert-butyl)-5-vinylcyclopentan-1-amine**

**(trans-3eac)**

The title compound was prepared according to the general procedure as a yellow solid (4.3 mg, 13% yield).  $^1\text{H}$  NMR (400 MHz,  $\text{CDCl}_3$ ):  $\delta$  = 7.43 (d,  $J$  = 8.4 Hz, 2H), 7.18 (d,  $J$  = 8.8 Hz, 2H), 6.45 (d,  $J$  = 2.4 Hz, 1H), 5.80-5.71 (m, 1H), 5.09-5.03 (m, 2H), 3.27 (d,  $J$  = 9.2 Hz, 1H), 2.62-2.56 (m, 2H), 2.12-2.06 (m, 1H), 2.01-1.94 (m, 1H), 1.66-1.61 (m, 1H), 1.38 (brs, 1H), 1.12 (s, 9H);  $^{13}\text{C}\{^1\text{H}\}$  NMR (101 MHz,  $\text{CDCl}_3$ ):  $\delta$  = 150.5, 141.3, 137.3, 131.3, 130.1, 120.8, 119.7, 115.6, 63.8, 51.8, 51.0, 30.7, 28.8, 28.2. HRMS (ESI<sup>+</sup>): calcd for  $\text{C}_{18}\text{H}_{25}\text{BrN}$  [ $\text{M}+\text{H}$ ]<sup>+</sup> 334.1165, found 334.1168.

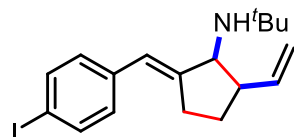

**(Cis)-N-(tert-butyl)-2-((E)-4-iodobenzylidene)-5-vinylcyclopentan-1-amine**

**(cis-3fac)**

The title compound was prepared according to the general procedure as a yellow solid (22.9 mg, 60% yield).  $^1\text{H}$  NMR (400 MHz,  $\text{CDCl}_3$ ):  $\delta$  = 7.60 (d,  $J$  = 2.4 Hz, 2H), 7.11 (d,  $J$  = 8.4 Hz, 2H), 6.49 (d,  $J$  = 2.4 Hz, 1H), 5.56-5.46 (m, 1H), 5.11-5.04 (m, 2H), 3.60 (d,  $J$  = 7.6 Hz, 1H), 2.71-2.58 (m, 3H), 1.94-1.87 (m, 1H), 1.82-1.76 (m, 1H), 1.13 (s, 9H);  $^{13}\text{C}\{^1\text{H}\}$  NMR (101 MHz,  $\text{CDCl}_3$ ):  $\delta$  = 149.0, 138.1, 137.8, 137.3, 130.3, 121.3, 117.4, 90.9, 61.6, 50.8, 48.2, 30.5, 27.9, 27.1. HRMS (ESI<sup>+</sup>): calcd for  $\text{C}_{18}\text{H}_{25}\text{IN}$  [ $\text{M}+\text{H}$ ]<sup>+</sup> 382.1027, found 382.1017.

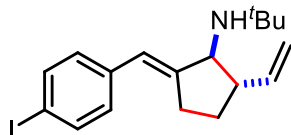

**(*Trans*)-*N*-(*tert*-butyl)-2-((*E*)-4-iodobenzylidene)-5-vinylcyclopentan-1-amine**

**(*trans*-3fac)**

The title compound was prepared according to the general procedure as a yellow solid (3.8 mg, 10% yield).  $^1\text{H}$  NMR (400 MHz,  $\text{CDCl}_3$ ):  $\delta$  = 7.63 (d,  $J$  = 8.4 Hz, 2H), 7.05 (d,  $J$  = 8.4 Hz, 2H), 6.43 (d,  $J$  = 2.0 Hz, 1H), 5.80-5.71 (m, 1H), 5.09-5.03 (m, 2H), 3.27 (d,  $J$  = 8.8 Hz, 1H), 2.62-2.53 (m, 2H), 2.12-2.08 (m, 1H), 2.01-1.93 (m, 1H), 1.66-1.62 (m, 1H), 1.12 (s, 9H);  $^{13}\text{C}\{^1\text{H}\}$  NMR (101 MHz,  $\text{CDCl}_3$ ):  $\delta$  = 150.7, 141.3, 137.9, 137.3, 130.4, 120.9, 115.6, 91.1, 63.9, 51.8, 51.0, 30.7, 28.8, 28.2. HRMS (ESI $^+$ ): calcd for  $\text{C}_{18}\text{H}_{25}\text{IN}$   $[\text{M}+\text{H}]^+$  382.1027, found 382.1027.

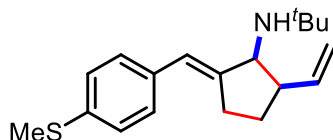

**(*Cis*)-*N*-(*tert*-butyl)-2-((*E*)-4-(methylthio)benzylidene)-5-vinylcyclopentan-1-amine**

**(*cis*-3gac)**

The title compound was prepared according to the general procedure as a yellow solid (14.1 mg, 47% yield).  $^1\text{H}$  NMR (400 MHz,  $\text{CDCl}_3$ ):  $\delta$  = 7.28 (d,  $J$  = 8.4 Hz, 2H), 7.19 (d,  $J$  = 8.4 Hz, 2H), 6.51 (d,  $J$  = 2.8 Hz, 1H), 5.58-5.49 (m, 1H), 5.10-5.04 (m, 2H), 3.61 (d,  $J$  = 4.0 Hz, 1H), 2.71-2.61 (m, 3H), 2.47 (s, 3H), 1.96-1.86 (m, 1H), 1.82-1.77 (m, 1H), 1.13 (s, 9H);  $^{13}\text{C}\{^1\text{H}\}$  NMR (101 MHz,  $\text{CDCl}_3$ ):  $\delta$  = 147.4, 138.0, 135.8, 135.4, 128.9, 126.7, 121.6, 117.2, 61.5, 50.8, 48.3, 30.5, 28.0, 27.1, 16.2. HRMS (ESI $^+$ ): calcd for  $\text{C}_{19}\text{H}_{28}\text{NS}$   $[\text{M}+\text{H}]^+$  302.1937, found 302.1945.

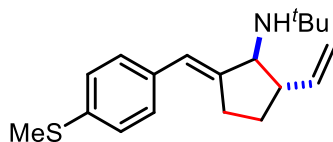

**(*Trans*)-*N*-(*tert*-butyl)-2-((*E*)-4-(methylthio)benzylidene)-5-vinylcyclopentan-1-amine**

**(*trans*-3gac)**

The title compound was prepared according to the general procedure as a yellow solid (4.8 mg, 16% yield).  $^1\text{H}$  NMR (400 MHz,  $\text{CDCl}_3$ ):  $\delta$  = 7.29-7.27 (m, 1H), 7.25 (m, 1H), 7.21-7.19 (m, 2H), 6.45 (d,  $J$  = 2.4 Hz, 1H), 5.81-5.72 (m, 1H), 5.09-5.02 (m, 2H), 3.26 (d,  $J$  = 8.4 Hz, 1H), 2.68-2.58 (m, 2H), 2.47 (s, 3H), 2.13-2.09 (m, 1H), 2.01-1.93 (m, 1H), 1.67-1.62 (m, 1H), 1.12 (s, 9H);  $^{13}\text{C}\{^1\text{H}\}$  NMR (101 MHz,  $\text{CDCl}_3$ ):

$\delta = 149.2, 141.4, 135.8, 135.5, 128.9, 126.6, 121.3, 115.4, 63.9, 51.9, 51.0, 30.7, 28.7, 28.3, 16.1$ . HRMS (ESI<sup>+</sup>): calcd for C<sub>19</sub>H<sub>28</sub>NS [M+H]<sup>+</sup> 302.1937, found 302.1950.

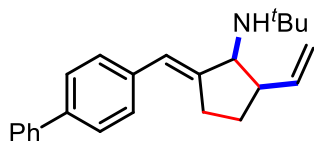

**(*Cis,E*)-2-([1,1'-biphenyl]-4-ylmethylene)-*N*-(*tert*-butyl)-5-vinylcyclopentan-1-amine (*cis*-3hac)**

The title compound was prepared according to the general procedure as a yellow solid (12.9 mg, 39% yield). <sup>1</sup>H NMR (400 MHz, CDCl<sub>3</sub>):  $\delta = 7.63$ -7.57 (m, 4H), 7.47-7.42 (m, 4H), 7.33 (t,  $J = 7.6$  Hz, 1H), 6.63 (d,  $J = 2.4$  Hz, 1H), 5.62-5.53 (m, 1H), 5.13-5.07 (m, 1H), 3.66 (d,  $J = 4.4$  Hz, 1H), 2.74-2.70 (m, 3H), 1.99-1.93 (m, 1H), 1.86-1.81 (m, 1H), 1.17 (s, 9H); <sup>13</sup>C{<sup>1</sup>H} NMR (101 MHz, CDCl<sub>3</sub>):  $\delta = 148.0, 141.1, 138.4, 138.1, 137.7, 128.9, 127.2, 127.0, 126.9, 121.8, 117.2, 61.7, 50.8, 48.4, 30.5, 28.0, 27.2$ . HRMS (ESI<sup>+</sup>): calcd for C<sub>24</sub>H<sub>30</sub>N [M+H]<sup>+</sup> 332.2373, found 332.2379.

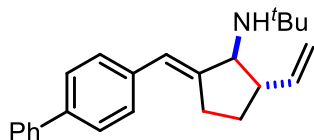

**(*Trans,E*)-2-([1,1'-biphenyl]-4-ylmethylene)-*N*-(*tert*-butyl)-5-vinylcyclopentan-1-amine (*trans*-3hac)**

The title compound was prepared according to the general procedure as a yellow solid (4.3 mg, 13% yield). <sup>1</sup>H NMR (400 MHz, CDCl<sub>3</sub>):  $\delta = 7.61$ -7.56 (m, 4H), 7.43-7.25 (m, 5H), 6.55 (s, 1H), 5.83-5.74 (m, 1H), 5.11-5.04 (m, 1H), 3.33 (d,  $J = 7.2$  Hz, 1H), 2.70-2.69 (m, 2H), 2.17-2.13 (m, 1H), 2.02-2.00 (m, 1H), 1.69-1.64 (m, 1H), 1.15 (brs, 1H), 1.15 (s, 9H); <sup>13</sup>C{<sup>1</sup>H} NMR (101 MHz, CDCl<sub>3</sub>):  $\delta = 149.8, 141.4, 141.0, 138.7, 137.4, 128.93, 128.85, 127.2, 127.0, 126.9, 121.5, 111.4, 64.0, 51.9, 51.0, 30.7, 28.9, 28.4$ . HRMS (ESI<sup>+</sup>): calcd for C<sub>24</sub>H<sub>30</sub>N [M+H]<sup>+</sup> 332.2373, found 332.2365.

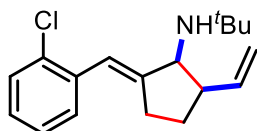

**(*Cis*)-*N*-(*tert*-butyl)-2-((*E*)-2-chlorobenzylidene)-5-vinylcyclopentan-1-amine (*cis*-3kac)**

The title compound was prepared according to the general procedure as a yellow solid (10.7 mg, 37% yield). <sup>1</sup>H NMR (400 MHz, CDCl<sub>3</sub>):  $\delta = 7.43$  (d,  $J = 9.2$  Hz, 1H), 7.34

(d,  $J = 6.8$  Hz, 1H), 7.19 (t,  $J = 8.0$  Hz, 1H), 7.10 (t,  $J = 7.6$  Hz, 1H), 6.84 (d,  $J = 2.4$  Hz, 1H), 5.67-5.58 (m, 1H), 5.13-5.06 (m, 2H), 3.65 (d,  $J = 6.0$  Hz, 1H), 2.71-2.53 (m, 3H), 1.91-1.89 (m, 1H), 1.88-1.74 (m, 1H), 1.15 (s, 9H);  $^{13}\text{C}\{^1\text{H}\}$  NMR (101 MHz,  $\text{CDCl}_3$ ):  $\delta = 150.1, 138.1, 126.8, 133.5, 129.5, 129.3, 127.1, 126.3, 119.1, 117.1, 61.5, 50.8, 48.4, 30.5, 27.9, 26.6$ . HRMS (ESI<sup>+</sup>): calcd for  $\text{C}_{18}\text{H}_{15}\text{ClN}$   $[\text{M}+\text{H}]^+$  290.1671, found 290.1689.

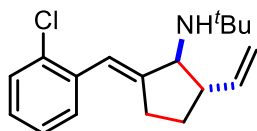

**(*Trans*)-*N*-(*tert*-butyl)-2-((*E*)-2-chlorobenzylidene)-5-vinylcyclopentan-1-amine**

**(*trans*-3kac)**

The title compound was prepared according to the general procedure as a yellow solid (2.5 mg, 19% yield).  $^1\text{H}$  NMR (400 MHz,  $\text{CDCl}_3$ ):  $\delta = 7.41$ -7.35 (m, 2H), 7.20 (t,  $J = 7.2$  Hz, 1H), 7.11 (t,  $J = 8.0$  Hz, 1H), 6.78 (d,  $J = 2.4$  Hz, 1H), 5.84-5.75 (m, 1H), 5.11-5.03 (m, 2H), 3.34 (d,  $J = 9.2$  Hz, 1H), 2.58-2.54 (m, 2H), 2.20-2.13 (m, 1H), 1.98-1.90 (m, 1H), 1.62-1.57 (m, 1H), 1.15 (s, 9H);  $^{13}\text{C}\{^1\text{H}\}$  NMR (101 MHz,  $\text{CDCl}_3$ ):  $\delta = 151.9, 141.4, 136.3, 133.6, 129.5, 129.4, 127.3, 126.3, 118.6, 115.2, 63.8, 52.3, 50.9, 30.8, 28.7, 28.0$ . HRMS (ESI<sup>+</sup>): calcd for  $\text{C}_{18}\text{H}_{15}\text{ClN}$   $[\text{M}+\text{H}]^+$  290.1671, found 290.1674.

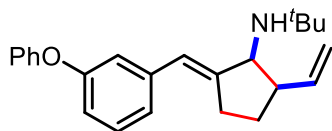

**(*Cis*)-*N*-(*tert*-butyl)-2-((*E*)-3-phenoxybenzylidene)-5-vinylcyclopentan-1-amine**

**(*cis*-3mac)**

The title compound was prepared according to the general procedure as a yellow solid (11.5 mg, 33% yield).  $^1\text{H}$  NMR (400 MHz,  $\text{CDCl}_3$ ):  $\delta = 7.34$ -7.25 (m, 3H), 7.13-7.00 (m, 5H), 6.82 (dd,  $J = 8.0, 2.0$  Hz, 1H), 6.53 (d,  $J = 2.8$  Hz, 1H), 5.57-5.48 (m, 1H), 5.10-5.04 (m, 2H), 3.59 (d,  $J = 6.0$  Hz, 1H), 2.69-2.59 (m, 3H), 1.92-1.87 (m, 1H), 1.80-1.74 (m, 1H), 1.13 (s, 9H);  $^{13}\text{C}\{^1\text{H}\}$  NMR (101 MHz,  $\text{CDCl}_3$ ):  $\delta = 157.6, 157.0, 148.7, 140.5, 137.9, 129.8, 129.4, 123.7, 123.0, 121.7, 118.9, 118.7, 117.2, 116.6, 61.6, 50.8, 48.3, 30.5, 28.0, 27.1$ . HRMS (ESI<sup>+</sup>): calcd for  $\text{C}_{24}\text{H}_{30}\text{NO}$   $[\text{M}+\text{H}]^+$  348.2322, found 348.2322.

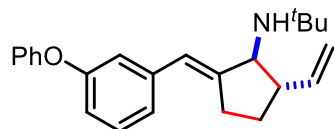

**(*Trans*)-*N*-(*tert*-butyl)-2-((*E*)-3-phenoxybenzylidene)-5-vinylcyclopentan-1-amine**  
**(*trans*-3mac)**

The title compound was prepared according to the general procedure as a yellow solid (5.9 mg, 17% yield). <sup>1</sup>H NMR (400 MHz, CDCl<sub>3</sub>): δ = 7.34-7.29 (m, 3H), 7.27-6.99 (m, 5H), 6.51 (dd, *J* = 8.0, 2.0 Hz, 1H), 6.47 (d, *J* = 2.4 Hz, 1H), 5.80-5.71 (m, 1H), 5.09-5.02 (m, 2H), 3.27 (d, *J* = 8.0 Hz, 1H), 2.60-2.56 (m, 2H), 2.12-2.08 (m, 1H), 1.98-1.91 (m, 1H), 1.64-1.56 (m, 1H), 1.11 (s, 9H); <sup>13</sup>C{<sup>1</sup>H} NMR (101 MHz, CDCl<sub>3</sub>): δ = 157.5, 157.1, 150.5, 141.4, 140.2, 129.8, 129.4, 123.7, 123.1, 121.4, 119.0, 118.8, 116.7, 115.5, 63.9, 51.8, 51.0, 30.7, 28.8, 28.3. HRMS (ESI<sup>+</sup>): calcd for C<sub>24</sub>H<sub>30</sub>NO [M+H]<sup>+</sup> 348.2322, found 348.2329.

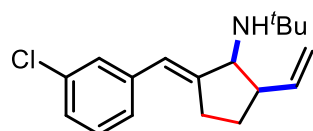

**(*Cis*)-*N*-(*tert*-butyl)-2-((*E*)-3-chlorobenzylidene)-5-vinylcyclopentan-1-amine**  
**(*cis*-3nac)**

The title compound was prepared according to the general procedure as a yellow solid (18.6 mg, 64% yield). <sup>1</sup>H NMR (400 MHz, CDCl<sub>3</sub>): δ = 7.35 (s, 1H), 7.25-7.22 (m, 2H), 7.13-7.11 (m, 1H), 6.52 (d, *J* = 2.8 Hz, 1H), 5.56-5.47 (m, 1H), 5.11-5.04 (m, 2H), 3.62 (d, *J* = 4.0 Hz, 1H), 2.72-2.62 (m, 3H), 1.97-1.90 (m, 1H), 1.88-1.77 (m, 1H), 1.13 (s, 9H); <sup>13</sup>C{<sup>1</sup>H} NMR (101 MHz, CDCl<sub>3</sub>): δ = 149.5, 140.5, 137.8, 134.1, 129.4, 128.2, 126.6, 125.8, 121.1, 117.4, 61.6, 50.8, 48.2, 30.5, 38.0, 27.0. HRMS (ESI<sup>+</sup>): calcd for C<sub>18</sub>H<sub>25</sub>ClN [M+H]<sup>+</sup> 290.1671, found 290.1685.

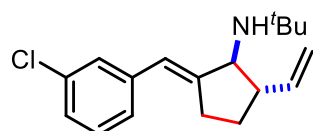

**(*Trans*)-*N*-(*tert*-butyl)-2-((*E*)-3-chlorobenzylidene)-5-vinylcyclopentan-1-amine**  
**(*trans*-3nac)**

The title compound was prepared according to the general procedure as a yellow solid (2.6 mg, 9% yield). <sup>1</sup>H NMR (400 MHz, CDCl<sub>3</sub>): δ = 7.31 (s, 1H), 7.23-7.13 (m, 3H), 6.46 (d, *J* = 2.0 Hz, 1H), 5.80-5.71 (m, 1H), 5.10-5.03 (m, 2H), 3.26 (d, *J* = 9.2 Hz, 1H), 2.71-2.60 (m, 2H), 2.12-2.08 (m, 1H), 2.02-1.94 (m, 1H), 1.67-1.61 (m, 1H),

1.12 (s, 9H);  $^{13}\text{C}\{^1\text{H}\}$  NMR (101 MHz,  $\text{CDCl}_3$ ):  $\delta = 151.2, 141.2, 140.2, 134.1, 129.4, 128.3, 126.7, 126.0, 120.7, 115.6, 63.8, 51.8, 51.0, 30.7, 28.7, 28.2$ . HRMS (ESI<sup>+</sup>): calcd for  $\text{C}_{18}\text{H}_{25}\text{ClN}$   $[\text{M}+\text{H}]^+$  290.1671, found 290.1673.

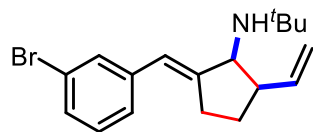

**(Cis)-2-((E)-3-bromobenzylidene)-N-(tert-butyl)-5-vinylcyclopentan-1-amine**

**(cis-3oac)**

The title compound was prepared according to the general procedure as a yellow solid (21.7 mg, 65% yield).  $^1\text{H}$  NMR (400 MHz,  $\text{CDCl}_3$ ):  $\delta = 7.51$  (s, 1H), 7.29-7.25 (m, 2H), 7.17 (t,  $J = 8.0$  Hz, 1H), 6.52 (d,  $J = 2.4$  Hz, 1H), 5.56-5.47 (m, 1H), 5.11-5.05 (m, 2H), 3.60 (d,  $J = 7.6$  Hz, 1H), 2.72-2.62 (m, 3H), 1.98-1.90 (m, 1H), 1.83-1.77 (m, 1H), 1.14 (s, 9H);  $^{13}\text{C}\{^1\text{H}\}$  NMR (101 MHz,  $\text{CDCl}_3$ ):  $\delta = 149.5, 140.8, 137.7, 131.2, 129.7, 128.7, 127.0, 122.5, 121.0, 117.4, 61.6, 50.8, 48.2, 30.5, 27.9, 27.0$ . HRMS (ESI<sup>+</sup>): calcd for  $\text{C}_{18}\text{H}_{25}\text{BrN}$   $[\text{M}+\text{H}]^+$  334.1165, found 334.1150.

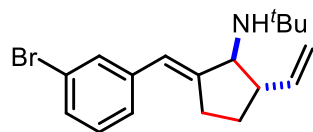

**(Trans)-2-((E)-3-bromobenzylidene)-N-(tert-butyl)-5-vinylcyclopentan-1-amine**

**(trans-3oac)**

The title compound was prepared according to the general procedure as a yellow solid (3.0 mg, 9% yield).  $^1\text{H}$  NMR (400 MHz,  $\text{CDCl}_3$ ):  $\delta = 7.47$  (s, 1H), 7.30-7.28 (m, 1H), 7.25-7.24 (m, 1H), 6.19 (d,  $J = 8.0$  Hz, 1H), 6.45 (d,  $J = 2.4$  Hz, 1H), 5.80-5.71 (m, 1H), 5.10-5.04 (m, 2H), 3.28 (d,  $J = 9.2$  Hz, 1H), 2.66-2.57 (m, 2H), 2.66-2.57 (m, 2H), 2.00-1.94 (m, 1H), 1.65-1.61 (m, 1H), 1.42 (brs, 1H), 1.12 (s, 9H);  $^{13}\text{C}\{^1\text{H}\}$  NMR (101 MHz,  $\text{CDCl}_3$ ):  $\delta = 151.3, 141.2, 140.5, 131.3, 129.7, 128.9, 127.1, 122.4, 120.6, 115.6, 63.8, 51.8, 51.0, 30.7, 28.7, 28.2$ . HRMS (ESI<sup>+</sup>): calcd for  $\text{C}_{18}\text{H}_{25}\text{BrN}$   $[\text{M}+\text{H}]^+$  334.1165, found 334.1177.

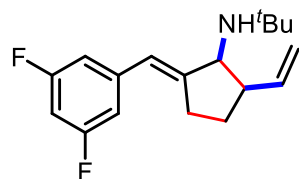

**(Cis)-N-(tert-butyl)-2-((E)-3,5-difluorobenzylidene)-5-vinylcyclopentan-1-amine**

**(cis-3rac)**

The title compound was prepared according to the general procedure as a yellow solid (total: 24.8 mg, 85% yield, d.r. = 16:1). (*Cis*):  $^1\text{H}$  NMR (400 MHz,  $\text{CDCl}_3$ ):  $\delta$  = 6.87 (d,  $J$  = 7.2 Hz, 2H), 6.63-6.57 (m, 1H), 6.52 (d,  $J$  = 2.4 Hz, 1H), 5.54-5.44 (m, 1H), 5.13-5.05 (m, 2H), 3.61 (d,  $J$  = 6.0 Hz, 1H), 2.73-2.61 (m, 3H), 1.98-1.88 (m, 1H), 1.84-1.78 (m, 1H), 1.13 (s, 9H);  $^{13}\text{C}\{^1\text{H}\}$  NMR (101 MHz,  $\text{CDCl}_3$ ):  $\delta$  = 164.3 (dd,  $J$  = 247.5, 13.1 Hz), 150.9, 141.8 (t,  $J$  = 10.1 Hz), 137.5, 120.8, 117.6, 111.0 (dd,  $J$  = 18.1, 6.1 Hz), 101.0 (t,  $J$  = 26.3 Hz), 61.6, 50.8, 48.2, 30.5, 27.8, 27.1. HRMS (ESI<sup>+</sup>): calcd for  $\text{C}_{18}\text{H}_{24}\text{F}_2\text{N}$   $[\text{M}+\text{H}]^+$  292.1872, found 292.1876.

## 5. General Procedure for the *cis*-Diastereoselective [4 + 2] Annulation of $\alpha,\beta$ -Unsaturated Aldimines with 1,3-Dienes via $\gamma$ -Allylic C–H Activation

### General procedure for *cis*-diastereoselective [4 + 2] annulation of $\alpha,\beta$ -unsaturated aldimines **4** with *o*-OMe-substituted 1-aryl-1,3-butadienes **2** via $\gamma$ -allylic C–H activation by **Ce-2** in the presence of $\text{Bn}_2\text{NH}$

In a glovebox,  $[\text{Ph}_3\text{C}][\text{B}(\text{C}_6\text{F}_5)_4]$  (9.2 mg, 0.010 mmol) was added to a toluene-*d*<sub>8</sub> solution (1.0 mL) of **Ce-2** (5.4 mg, 0.010 mmol) in a J. Young NMR tube. After 5 min, *N,N*-dibenzylamine (1.9 mg, 0.010 mmol) was added to this tube. After 5 min,  $\alpha,\beta$ -unsaturated aldimines **4** (0.1 mmol) and *o*-OMe-substituted 1-aryl-1,3-butadienes **2** (0.4 mmol) were added. The tube was sealed, taken outside of glovebox, and stirred at indicated temperatures for indicated times. Then, the tube was cooled to room temperature and the reaction mixture was monitored by NMR. The crude NMR yields were calculated on the basis of formation of the corresponding product **5**. The reaction mixture was filtered through a short silica gel column (EtOAc). The filtrate was evaporated under a reduced pressure. The d.r. ratio was determined by  $^1\text{H}$  NMR analysis of the crude reaction mixture. The solution was concentrated and purified directly by column chromatography on silica gel (hexane/EtOAc = 15/1, v/v) to give the pure product *cis*-**5**. Identical results were obtained when the reactions were conducted in toluene using a Schlenk tube.

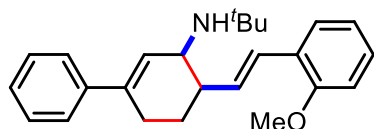

### (*Cis*)-*N*-(*tert*-butyl)-4-((*E*)-2-methoxystyryl)-3,4,5,6-tetrahydro-[1,1'-biphenyl]-3-amine (*cis*-**5ba**)

The title compound was prepared according to the general procedure as a yellow oil (22.8 mg, 63% yield).  $^1\text{H}$  NMR (400 MHz,  $\text{CDCl}_3$ ):  $\delta$  = 7.47 (dd,  $J$  = 7.6, 2.4 Hz, 1H), 7.44-7.42 (m, 2H), 7.32 (t,  $J$  = 8.0 Hz, 2H), 7.23-7.16 (m, 2H), 6.90 (t,  $J$  = 7.6 Hz,

1H), 6.86-6.80 (m, 2H), 6.46 (dd,  $J = 16.0, 8.8$  Hz, 1H), 6.17 (d,  $J = 4.4$  Hz, 1H), 3.84 (s, 3H), 3.43 (s, 1H), 2.58-2.38 (m, 3H), 1.93-1.88 (m, 2H), 1.12 (brs, 1H), 1.12 (s, 9H);  $^{13}\text{C}\{^1\text{H}\}$  NMR (101 MHz,  $\text{CDCl}_3$ ):  $\delta = 156.3, 141.9, 135.9, 133.5, 130.3, 128.3, 128.0, 127.0, 126.4, 125.3, 124.7, 120.7, 110.9, 55.6, 51.1, 50.6, 43.9, 30.3, 26.3, 26.0$ . HRMS (ESI<sup>+</sup>): calcd for  $\text{C}_{25}\text{H}_{32}\text{NO}$   $[\text{M}+\text{H}]^+$  362.2479, found 362.2463.

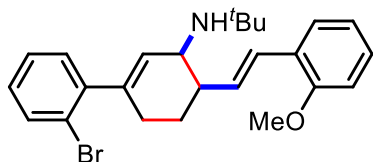

**(Cis)-2'-bromo-*N*-(*tert*-butyl)-4-((*E*)-2-methoxystyryl)-3,4,5,6-tetrahydro-[1,1'-biphenyl]-3-amine (*cis*-5ea)**

The title compound was prepared according to the general procedure as a yellow oil (25.5 mg, 58% yield).  $^1\text{H}$  NMR (400 MHz,  $\text{CDCl}_3$ ):  $\delta = 7.55$ -7.50 (m, 2H), 7.28-7.24 (m, 1H), 7.21-7.17 (m, 2H), 7.12-7.08 (m, 1H), 6.92 (t,  $J = 7.6$  Hz, 1H), 6.87-6.82 (m, 2H), 6.56 (dd,  $J = 16.0, 8.8$  Hz, 1H), 5.71-5.70 (m, 1H), 3.85 (s, 3H), 3.41-3.39 (m, 1H), 2.61-2.56 (m, 1H), 2.39-2.26 (m, 2H), 1.93-1.86 (m, 2H), 1.09 (s, 9H);  $^{13}\text{C}\{^1\text{H}\}$  NMR (101 MHz,  $\text{CDCl}_3$ ):  $\delta = 156.4, 144.6, 138.4, 133.9, 132.84, 132.75, 130.0, 128.3, 127.9, 127.3, 127.1, 126.4, 124.6, 122.7, 120.8, 110.9, 55.6, 51.1, 50.2, 43.9, 30.3, 28.1, 26.3$ . HRMS (ESI<sup>+</sup>): calcd for  $\text{C}_{25}\text{H}_{31}\text{BrNO}$   $[\text{M}+\text{H}]^+$  440.1584, found 440.1594.

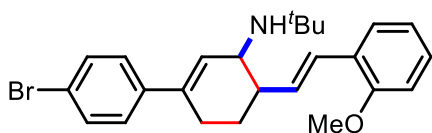

**(Cis)-4'-bromo-*N*-(*tert*-butyl)-4-((*E*)-2-methoxystyryl)-3,4,5,6-tetrahydro-[1,1'-biphenyl]-3-amine (*cis*-5fa)**

The title compound was prepared according to the general procedure as a yellow oil (28.6 mg, 65% yield).  $^1\text{H}$  NMR (400 MHz,  $\text{CDCl}_3$ ):  $\delta = 7.47$ -7.41 (m, 3H), 7.29 (d,  $J = 8.4$  Hz, 2H), 7.18 (t,  $J = 8.0$  Hz, 1H), 6.90 (t,  $J = 7.6$  Hz, 1H), 6.86-6.80 (m, 2H), 6.42 (dd,  $J = 16.1, 4.8$  Hz, 1H), 6.15 (d,  $J = 4.0$  Hz, 1H), 3.83 (s, 3H), 3.42 (s, 1H), 2.58-2.33 (m, 3H), 1.93-1.88 (m, 2H), 1.11 (s, 9H);  $^{13}\text{C}\{^1\text{H}\}$  NMR (101 MHz,  $\text{CDCl}_3$ ):  $\delta = 156.3, 140.7, 134.9, 133.0, 131.3, 130.9, 128.1, 126.94, 126.86, 126.4, 125.1, 120.8, 120.7, 110.9, 55.6, 51.2, 50.6, 43.7, 30.2, 26.3, 25.7$ . HRMS (ESI<sup>+</sup>): calcd for  $\text{C}_{25}\text{H}_{31}\text{BrNO}$   $[\text{M}+\text{H}]^+$  440.1584, found 440.1580.

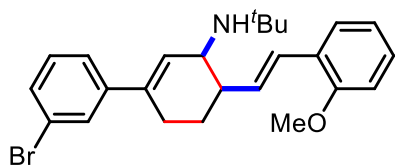

**(Cis)-3'-bromo-N-(tert-butyl)-4-((E)-2-methoxystyryl)-3,4,5,6-tetrahydro-[1,1'-biphenyl]-3-amine (cis-5ga)**

The title compound was prepared according to the general procedure as a yellow oil (23.8 mg, 54% yield).  $^1\text{H}$  NMR (400 MHz,  $\text{CDCl}_3$ ):  $\delta$  = 7.57 (t,  $J$  = 2.0 Hz, 1H), 7.47 (dd,  $J$  = 7.6, 1.6 Hz, 1H), 7.37-7.33 (m, 2H), 7.20-7.16 (m, 2H), 6.90 (t,  $J$  = 7.6 Hz, 1H), 6.87-6.81 (m, 2H), 6.42 (dd,  $J$  = 16.0, 8.8 Hz, 1H), 6.15 (d,  $J$  = 4.0 Hz, 1H), 3.84 (s, 3H), 3.431 (m, 1H), 2.59-2.38 (m, 3H), 1.93-1.88 (m, 2H), 1.12 (s, 9H);  $^{13}\text{C}\{^1\text{H}\}$  NMR (101 MHz,  $\text{CDCl}_3$ ):  $\delta$  = 156.4, 144.1, 134.8, 133.0, 131.6, 129.9, 129.8, 128.5, 128.1, 126.9, 126.4, 125.1, 123.9, 122.6, 120.7, 110.9, 55.6, 51.2, 50.6, 43.8, 30.3, 26.3, 25.8. HRMS (ESI $^+$ ): calcd for  $\text{C}_{25}\text{H}_{31}\text{BrNO}$   $[\text{M}+\text{H}]^+$  440.1584, found 440.1585.

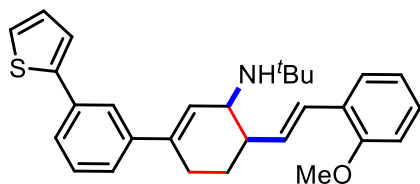

**(Cis)-N-(tert-butyl)-4-((E)-2-methoxystyryl)-3'-(thiophen-2-yl)-3,4,5,6-tetrahydro-[1,1'-biphenyl]-3-amine (cis-5ha)**

The title compound was prepared according to the general procedure as a yellow oil (17.7 mg, 40% yield).  $^1\text{H}$  NMR (400 MHz,  $\text{CDCl}_3$ ):  $\delta$  = 7.72 (s, 1H), 7.56-7.54 (m, 1H), 7.48-7.46 (m, 2H), 7.33 (d,  $J$  = 4.4 Hz, 2H), 7.19 (t,  $J$  = 8.4 Hz, 1H), 6.92-6.82 (m, 3H), 6.67 (d,  $J$  = 5.6 Hz, 1H), 6.48-6.42 (m, 2H), 6.20 (d,  $J$  = 5.6 Hz, 1H), 3.84 (s, 3H), 3.49 (s, 1H), 2.64-2.41 (m, 3H), 1.94-1.91 (m, 2H), 1.14 (s, 9H);  $^{13}\text{C}\{^1\text{H}\}$  NMR (101 MHz,  $\text{CDCl}_3$ ):  $\delta$  = 154.6, 154.1, 142.2, 142.1, 132.9, 130.9, 129.9, 128.7, 128.1, 126.8, 126.7, 126.4, 125.3, 124.5, 122.7, 120.9, 120.7, 111.7, 110.9, 105.1, 55.6, 50.8, 43.7, 30.1, 29.8, 26.3, 26.0. HRMS (ESI $^+$ ): calcd for  $\text{C}_{29}\text{H}_{34}\text{NOS}$   $[\text{M}+\text{H}]^+$  444.2356, found 444.2350.

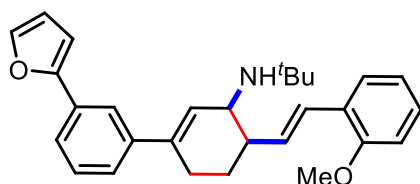

**(Cis)-N-(tert-butyl)-3'-(furan-2-yl)-4-((E)-2-methoxystyryl)-3,4,5,6-tetrahydro-[1,1'-biphenyl]-3-amine (cis-5ia)**

The title compound was prepared according to the general procedure as a yellow oil (15.0 mg, 35% yield). <sup>1</sup>H NMR (400 MHz, CDCl<sub>3</sub>): δ = 7.64 (s, 1H), 7.50-7.46 (m, 2H), 7.36-7.32 (m, 3H), 7.28 (d, *J* = 4.4 Hz, 1H), 7.21-7.17 (m, 1H), 7.08 (dd, *J* = 5.2, 3.6 Hz, 1H), 6.90 (t, *J* = 7.6 Hz, 1H), 6.87-6.82 (m, 2H), 6.44 (dd, *J* = 16.8, 8.4 Hz, 1H), 6.20 (t, *J* = 4.0 Hz, 1H), 3.84 (s, 3H), 3.50 (s, 1H), 2.65-2.53 (m, 2H), 2.48-2.31 (m, 1H), 1.96-1.91 (m, 2H), 1.15 (s, 9H); <sup>13</sup>C{<sup>1</sup>H} NMR (101 MHz, CDCl<sub>3</sub>): δ = 158.1, 156.4, 144.5, 142.4, 134.5, 128.9, 128.2, 128.1, 126.7, 126.5, 124.9, 124.7, 123.3, 123.3, 120.8, 118.5, 110.9, 104.5, 103.1, 55.6, 51.2, 50.8, 43.6, 30.0, 26.2, 26.0. HRMS (ESI<sup>+</sup>): calcd for C<sub>29</sub>H<sub>34</sub>NO<sub>2</sub> [M+H]<sup>+</sup> 428.2585, found 428.2598.

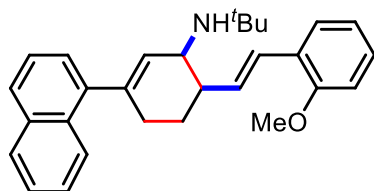

**(Cis)-N-(tert-butyl)-6-((E)-2-methoxystyryl)-3-(naphthalen-1-yl)cyclohex-2-en-1-amine (cis-5ja)**

The title compound was prepared according to the general procedure as a yellow oil (15.6 mg, 38% yield). <sup>1</sup>H NMR (600 MHz, CDCl<sub>3</sub>): δ = 8.01-8.00 (m, 1H), 7.85-7.83 (m, 1H), 7.75 (d, *J* = 7.8 Hz, 1H), 7.55 (d, *J* = 8.4 Hz, 1H), 7.47-7.42 (m, 3H), 7.31 (d, *J* = 6.6 Hz, 1H), 7.21 (d, *J* = 6.6 Hz, 1H), 6.95 (t, *J* = 7.2 Hz, 1H), 6.90-6.87 (m, 2H), 6.42 (dd, *J* = 16.2, 8.4 Hz, 1H), 5.56 (s, 1H), 3.86 (s, 3H), 3.52 (s, 1H), 2.71-2.68 (m, 1H), 2.50-2.38 (m, 2H), 2.05-1.93 (m, 2H), 1.10 (s, 9H); <sup>13</sup>C{<sup>1</sup>H} NMR (101 MHz, CDCl<sub>3</sub>): δ = 156.5, 142.2, 137.6, 133.8, 132.9, 131.4, 128.4, 128.0, 127.9, 127.09, 127.05, 126.5, 125.7, 125.1, 125.0, 124.8, 120.7, 111.0, 55.6, 51.3, 50.5, 44.0, 30.2, 30.0, 26.4. HRMS (ESI<sup>+</sup>): calcd for C<sub>29</sub>H<sub>34</sub>NO [M+H]<sup>+</sup> 412.2635, found 412.2644.

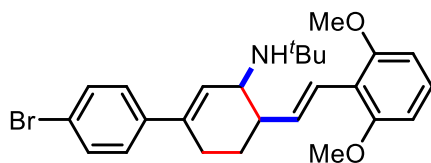

**(Cis)-4'-bromo-N-(tert-butyl)-4-((E)-2,6-dimethoxystyryl)-3,4,5,6-tetrahydro-[1,1'-biphenyl]-3-amine (cis-5ka)**

The title compound was prepared according to the general procedure as a yellow oil (17.4 mg, 37% yield). <sup>1</sup>H NMR (400 MHz, CDCl<sub>3</sub>): δ = 7.43 (d, *J* = 8.8 Hz, 2H), 7.30 (d, *J* = 8.4 Hz, 2H), 7.11 (t, *J* = 8.4 Hz, 1H), 6.73-6.72 (m, 2H), 6.55 (d, *J* = 8.0 Hz,

2H), 6.13 (d,  $J = 3.6$  Hz, 1H), 3.81 (s, 6H), 3.47 (s, 1H), 2.62-2.47 (m, 2H), 2.39-2.31 (m, 1H), 1.98-1.93 (m, 2H), 1.14 (s, 9H);  $^{13}\text{C}\{^1\text{H}\}$  NMR (101 MHz,  $\text{CDCl}_3$ ):  $\delta = 158.3, 140.9, 136.2, 135.0, 131.3, 128.5, 128.3, 127.5, 127.1, 127.0, 121.7, 120.7, 115.2, 104.1, 55.8, 52.3, 51.3, 50.8, 44.7, 30.2, 26.8, 25.6$ . HRMS (ESI<sup>+</sup>): calcd for  $\text{C}_{26}\text{H}_{33}\text{BrNO}_2$   $[\text{M}+\text{H}]^+$  470.1690, found 470.1692.

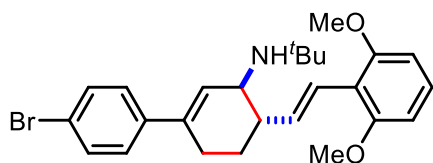

**(*Trans*)-4'-bromo-*N*-(*tert*-butyl)-4-((*E*)-2,6-dimethoxystyryl)-3,4,5,6-tetrahydro-[1,1'-biphenyl]-3-amine (*trans*-5ka)**

The title compound was prepared according to the general procedure as a yellow oil (8.5 mg, 18% yield).  $^1\text{H}$  NMR (400 MHz,  $\text{CDCl}_3$ ):  $\delta = 7.42$  (d,  $J = 8.4$  Hz, 2H), 7.26 (d,  $J = 8.4$  Hz, 2H), 7.13 (t,  $J = 8.4$  Hz, 1H), 6.76 (d,  $J = 16.2$  Hz, 1H), 6.56 (d,  $J = 8.4$  Hz, 2H), 6.49 (dd,  $J = 16.2, 9.0$  Hz, 1H), 6.09 (s, 1H), 3.81 (s, 6H), 3.29 (d,  $J = 8.4$  Hz, 1H), 2.48-2.42 (m, 2H), 2.21-2.20 (m, 1H), 2.07-2.04 (m, 1H), 1.83-1.77 (m, 1H), 1.15 (s, 9H);  $^{13}\text{C}\{^1\text{H}\}$  NMR (101 MHz,  $\text{CDCl}_3$ ):  $\delta = 158.4, 140.9, 137.4, 135.5, 131.3, 130.0, 128.5, 127.7, 127.1, 127.0, 121.9, 120.8, 114.7, 104.0, 55.7, 53.2, 51.8, 46.7, 30.0, 29.8, 28.7, 26.5$ . HRMS (ESI<sup>+</sup>): calcd for  $\text{C}_{26}\text{H}_{33}\text{BrNO}_2$   $[\text{M}+\text{H}]^+$  470.1690, found 470.1700.

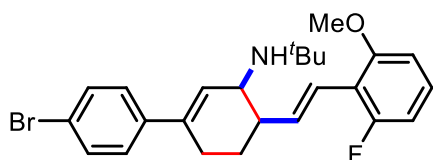

**(*Cis*)-4'-bromo-*N*-(*tert*-butyl)-4-((*E*)-2-fluoro-6-methoxystyryl)-3,4,5,6-tetrahydro-[1,1'-biphenyl]-3-amine (*cis*-5la)**

The title compound was prepared according to the general procedure as a yellow oil (total: 29.3 mg, 64% yield, d.r. = 4:1). (*Cis*):  $^1\text{H}$  NMR (400 MHz,  $\text{CDCl}_3$ ):  $\delta = 7.42$  (d,  $J = 7.2$  Hz, 2H), 7.29 (d,  $J = 8.4$  Hz, 2H), 7.10-7.06 (m, 1H), 6.72-6.59 (m, 4H), 6.14 (d,  $J = 2.4$  Hz, 1H), 3.83 (s, 3H), 3.46 (s, 1H), 2.57-2.47 (m, 2H), 2.38-2.35 (m, 1H), 1.94-1.89 (m, 2H), 1.13 (s, 9H);  $^{13}\text{C}\{^1\text{H}\}$  NMR (101 MHz,  $\text{CDCl}_3$ ):  $\delta = 162.6$  (d,  $J = 249.5$  Hz), 158.3 (d,  $J = 12.1$  Hz), 140.8, 138.2 (d,  $J = 9.1$  Hz), 135.3, 131.3, 130.5, 127.5 (d,  $J = 11.1$  Hz), 127.0, 120.8, 119.5, 115.0 (d,  $J = 14.1$  Hz), 108.5 (d,  $J = 23.2$  Hz), 106.4, 56.0, 51.4, 50.6, 44.6, 30.1, 26.2, 25.8. HRMS (ESI<sup>+</sup>): calcd for  $\text{C}_{25}\text{H}_{30}\text{BrFNO}$   $[\text{M}+\text{H}]^+$  458.1490, found 458.1487.

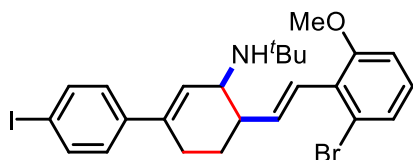

**(Cis)-4-((E)-2-bromo-6-methoxystyryl)-N-(tert-butyl)-4'-iodo-3,4,5,6-tetrahydro-[1,1'-biphenyl]-3-amine (cis-5ma)**

The title compound was prepared according to the general procedure as a yellow oil (total: 36.8 mg, 65% yield, d.r. = 9:1). (Cis):  $^1\text{H}$  NMR (400 MHz,  $\text{CDCl}_3$ ):  $\delta$  = 7.62 (d,  $J$  = 8.8 Hz, 2H), 7.17 (t,  $J$  = 8.4 Hz, 3H), 7.00 (t,  $J$  = 8.4 Hz, 1H), 6.82 (d,  $J$  = 8.4 Hz, 1H), 6.57-6.44 (m, 2H), 6.11 (d,  $J$  = 3.2 Hz, 1H), 3.78 (s, 3H), 3.52 (s, 1H), 2.71-2.65 (m, 1H), 2.54-2.46 (m, 1H), 2.40-2.34 (m, 1H), 2.03-1.94 (m, 2H), 1.15 (s, 9H);  $^{13}\text{C}\{^1\text{H}\}$  NMR (101 MHz,  $\text{CDCl}_3$ ):  $\delta$  = 158.3, 141.3, 138.3, 137.3, 135.4, 130.8, 128.1, 127.2, 126.9, 126.8, 125.3, 124.8, 110.0, 92.3, 51.9, 51.6, 50.9, 44.0, 30.0, 26.8, 25.0. HRMS (ESI<sup>+</sup>): calcd for  $\text{C}_{25}\text{H}_{30}\text{BrINO}$   $[\text{M}+\text{H}]^+$  566.0550, found 566.0554.

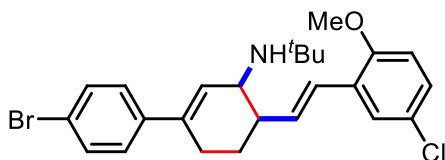

**(Cis)-4'-bromo-N-(tert-butyl)-4-((E)-5-chloro-2-methoxystyryl)-3,4,5,6-tetrahydro-[1,1'-biphenyl]-3-amine (cis-5na)**

The title compound was prepared according to the general procedure as a yellow oil (total: 19.5 mg, 41% yield, d.r. = 8:1). (Cis):  $^1\text{H}$  NMR (600 MHz,  $\text{CDCl}_3$ ):  $\delta$  = 7.42 (d,  $J$  = 8.4 Hz, 2H), 7.40 (d,  $J$  = 3.0 Hz, 1H), 7.29 (d,  $J$  = 9.0 Hz, 2H), 7.11 (dd,  $J$  = 8.4, 3.0, Hz, 1H), 6.76-6.72 (m, 2H), 6.42 (dd,  $J$  = 16.2, 8.4 Hz, 1H), 6.15 (d,  $J$  = 4.2 Hz, 1H), 3.81 (s, 3H), 3.42 (s, 1H), 2.57-2.53 (m, 2H), 2.48-2.33 (m, 1H), 1.92-1.88 (m, 2H), 1.11 (s, 9H);  $^{13}\text{C}\{^1\text{H}\}$  NMR (101 MHz,  $\text{CDCl}_3$ ):  $\delta$  = 154.9, 140.6, 135.2, 134.6, 131.4, 130.4, 128.5, 127.5, 127.0, 126.1, 125.8, 124.0, 120.9, 112.1, 55.9, 51.3, 50.6, 43.7, 30.2, 26.0, 25.8. HRMS (ESI<sup>+</sup>): calcd for  $\text{C}_{25}\text{H}_{30}\text{BrClNO}$   $[\text{M}+\text{H}]^+$  474.1194, found 474.1180.

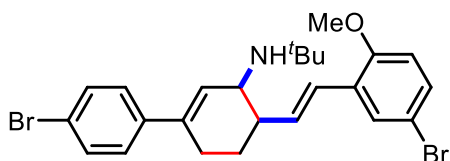

**(Cis)-4'-bromo-4-((E)-5-bromo-2-methoxystyryl)-N-(tert-butyl)-3,4,5,6-tetrahydro-[1,1'-biphenyl]-3-amine (cis-5oa)**

The title compound was prepared according to the general procedure as a yellow oil (total: 20.8 mg, 40% yield, d.r. = 7:1). (*Cis*):  $^1\text{H}$  NMR (600 MHz,  $\text{CDCl}_3$ ):  $\delta$  = 7.53 (d,  $J$  = 2.4 Hz, 1H), 7.43 (d,  $J$  = 9.0 Hz, 2H), 7.28 (d,  $J$  = 8.4 Hz, 2H), 7.26-7.24 (m, 1H), 6.73-6.70 (m, 2H), 6.41 (dd,  $J$  = 16.2, 9.0 Hz, 1H), 6.14 (d,  $J$  = 4.2 Hz, 1H), 3.81 (s, 3H), 3.42 (s, 1H), 2.56-2.44 (m, 2H), 2.39-2.33 (m, 1H), 1.93-1.85 (m, 2H), 1.11 (s, 9H);  $^{13}\text{C}\{^1\text{H}\}$  NMR (101 MHz,  $\text{CDCl}_3$ ):  $\delta$  = 155.4, 144.1, 140.6, 135.2, 134.6, 131.4, 130.4, 129.0, 127.0, 124.0, 120.9, 113.3, 112.6, 55.8, 51.4, 50.6, 43.7, 30.1, 26.1, 25.8. HRMS (ESI<sup>+</sup>): calcd for  $\text{C}_{25}\text{H}_{30}\text{Br}_2\text{NO}$   $[\text{M}+\text{H}]^+$  520.0669, found 520.0678.

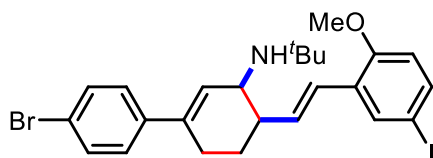

**(*Cis*)-4'-bromo-*N*-(*tert*-butyl)-4-((*E*)-5-iodo-2-methoxystyryl)-3,4,5,6-tetrahydro-[1,1'-biphenyl]-3-amine (*cis*-5pa)**

The title compound was prepared according to the general procedure as a yellow oil (total: 20.8 mg, 38% yield, d.r. = 7:1). (*Cis*):  $^1\text{H}$  NMR (600 MHz,  $\text{CDCl}_3$ ):  $\delta$  = 7.70 (d,  $J$  = 1.8 Hz, 1H), 7.47-7.42 (m, 3H), 7.29 (d,  $J$  = 8.4 Hz, 2H), 6.67 (d,  $J$  = 16.2 Hz, 1H), 6.61 (d,  $J$  = 8.4 Hz, 1H), 6.39 (dd,  $J$  = 16.2, 8.4 Hz, 1H), 6.14 (d,  $J$  = 3.6 Hz, 1H), 3.80 (s, 3H), 3.42 (s, 1H), 2.55-2.44 (m, 2H), 2.37-2.33 (m, 1H), 1.91-1.87 (m, 2H), 1.11 (brs, 1H), 1.11 (s, 9H);  $^{13}\text{C}\{^1\text{H}\}$  NMR (101 MHz,  $\text{CDCl}_3$ ):  $\delta$  = 156.2, 140.6, 138.4, 136.5, 135.0, 134.5, 131.4, 130.4, 129.5, 127.0, 123.9, 120.9, 113.1, 83.4, 55.7, 51.3, 50.6, 43.7, 30.2, 26.1, 25.8. HRMS (ESI<sup>+</sup>): calcd for  $\text{C}_{25}\text{H}_{30}\text{BrINO}$   $[\text{M}+\text{H}]^+$  566.0550, found 566.0557.

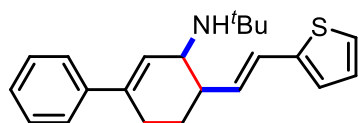

**(*Cis*)-*N*-(*tert*-butyl)-4-((*E*)-2-(thiophen-2-yl)vinyl)-3,4,5,6-tetrahydro-[1,1'-biphenyl]-3-amine (*cis*-5qa)**

The title compound was prepared according to the general procedure as a yellow oil (11.5 mg, 34% yield).  $^1\text{H}$  NMR (400 MHz,  $\text{CDCl}_3$ ):  $\delta$  = 7.43 (d,  $J$  = 7.2 Hz, 2H), 7.32 (t,  $J$  = 7.6 Hz, 2H), 7.25-7.22 (m, 1H), 7.09 (d,  $J$  = 5.2 Hz, 1H), 6.94-6.92 (m, 1H), 6.89-6.88 (m, 1H), 6.61 (d,  $J$  = 16.0 Hz, 1H), 6.33 (dd,  $J$  = 15.6, 8.4 Hz, 1H), 6.17 (d,  $J$  = 4.4 Hz, 1H), 3.38 (s, 1H), 2.53-2.36 (m, 3H), 1.88-1.82 (m, 2H), 1.11 (brs, 1H), 1.11 (s, 9H);  $^{13}\text{C}\{^1\text{H}\}$  NMR (101 MHz,  $\text{CDCl}_3$ ):  $\delta$  = 143.5, 141.8, 136.1, 133.9, 129.7,

128.4, 127.3, 127.1, 125.3, 124.3, 123.3, 123.1, 51.1, 50.3, 43.6, 30.3, 26.3, 25.6. HRMS (ESI<sup>+</sup>): calcd for C<sub>22</sub>H<sub>28</sub>NS [M+H]<sup>+</sup> 338.1937, found 338.1945.

**General procedure for cascade *cis*-diastereoselective [4 + 2] annulation and hydroamination of  $\alpha,\beta$ -unsaturated aldimines **4** with amino-substituted 1-aryl-1,3-butadienes **2** via  $\gamma$ -allylic C–H activation by Ce-2 in the presence of Bn<sub>2</sub>NH**

In a glovebox, [Ph<sub>3</sub>C][B(C<sub>6</sub>F<sub>5</sub>)<sub>4</sub>] (9.2 mg, 0.010 mmol) was added to a toluene-*d*<sub>8</sub> solution (1.0 mL) of Ce-2 (5.4 mg, 0.010 mmol) in a J. Young NMR tube. After 5 min, *N,N*-dibenzylamine (1.9 mg, 0.010 mmol) was added to this tube. After 5 min,  $\alpha,\beta$ -unsaturated aldimines **4** (0.1 mmol) and amino-substituted 1-aryl-1,3-butadienes **2** (0.4 mmol) were added. The tube was sealed, taken outside of glovebox, and stirred at indicated temperatures for indicated times. Then, the tube was cooled to room temperature and the reaction mixture was monitored by NMR. The crude NMR yields were calculated on the basis of formation of the corresponding product *cis*-**6**. The reaction mixture was filtered through a short silica gel column (EtOAc). The filtrate was evaporated under a reduced pressure. The d.r. ratio was determined by <sup>1</sup>H NMR analysis of the crude reaction mixture. The solution was concentrated and purified directly by column chromatography on silica gel (hexane/EtOAc = 5/1, v/v) to give the pure product *cis*-**6**. Identical results were obtained when the reactions were conducted in toluene using a Schlenk tube.

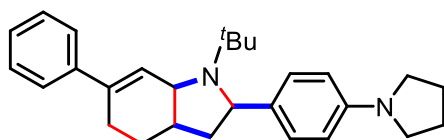

**(*Cis*)-1-(*tert*-butyl)-6-phenyl-2-(4-(pyrrolidin-1-yl)phenyl)-2,3,3a,4,5,7a-hexahydro-1H-indole (*cis*-6aa)**

The title compound was prepared according to the general procedure as a yellow solid (25.2 mg, 63% yield). <sup>1</sup>H NMR (400 MHz, CDCl<sub>3</sub>):  $\delta$  = 7.45 (d, *J* = 7.6 Hz, 2H), 7.33 (t, *J* = 8.0 Hz, 2H), 7.25-7.21 (m, 3H), 6.46 (d, *J* = 8.4 Hz, 2H), 6.02 (s, 1H), 4.06 (dd, *J* = 10.4, 6.8 Hz, 1H), 3.77 (d, *J* = 8.8 Hz, 1H), 3.23 (t, *J* = 6.4 Hz, 4H), 2.32-2.25 (m, 3H), 1.98-1.87 (m, 7H), 1.71-1.62 (m, 1H), 1.01 (s, 9H); <sup>13</sup>C{<sup>1</sup>H} NMR (101 MHz, CDCl<sub>3</sub>):  $\delta$  = 146.4, 142.9, 137.1, 133.0, 131.1, 128.2, 127.2, 126.6, 125.5, 111.3, 62.7, 57.9, 55.1, 47.7, 40.7, 36.2, 27.8, 25.6, 23.7, 22.3. HRMS (ESI<sup>+</sup>): calcd for C<sub>28</sub>H<sub>37</sub>N<sub>2</sub> [M+H]<sup>+</sup> 401.2952, found 401.2941.

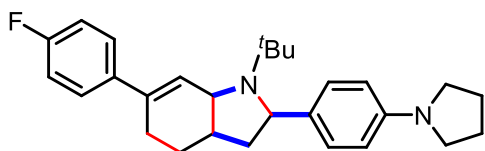

**(Cis)-1-(tert-butyl)-6-(4-fluorophenyl)-2-(4-(pyrrolidin-1-yl)phenyl)-2,3,3a,4,5,7a-hexahydro-1H-indole (cis-6ba)**

The title compound was prepared according to the general procedure as a red oil (31.0 mg, 74% yield).  $^1\text{H}$  NMR (400 MHz,  $\text{CDCl}_3$ ):  $\delta$  = 7.40-7.36 (m, 2H), 7.20 (d,  $J$  = 8.4 Hz, 2H), 7.01 (t,  $J$  = 8.4 Hz, 2H), 6.44 (d,  $J$  = 8.8 Hz, 2H), 5.95 (s, 1H), 4.06 (dd,  $J$  = 10.4, 6.8 Hz, 1H), 3.74 (d,  $J$  = 7.2 Hz, 1H), 3.23 (t,  $J$  = 6.4 Hz, 4H), 2.31-2.23 (m, 3H), 1.98-1.87 (m, 7H), 1.68-1.59 (m, 1H), 1.00 (s, 9H);  $^{13}\text{C}\{^1\text{H}\}$  NMR (101 MHz,  $\text{CDCl}_3$ ):  $\delta$  = 163.1 (d,  $J$  = 246.4 Hz), 146.4, 138.9 (d,  $J$  = 3.0 Hz), 137.1, 132.0, 131.0, 127.2, 127.0 (d,  $J$  = 8.1 Hz), 115.1 (d,  $J$  = 27.3 Hz), 111.3, 62.6, 57.9, 55.1, 47.7, 40.7, 36.1, 27.8, 25.6, 23.6, 22.5. HRMS (ESI<sup>+</sup>): calcd for  $\text{C}_{28}\text{H}_{36}\text{FN}_2$   $[\text{M}+\text{H}]^+$  419.2858, found 419.2841.

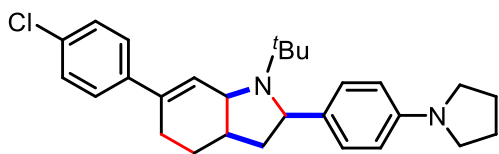

**(Cis)-1-(tert-butyl)-6-(4-chlorophenyl)-2-(4-(pyrrolidin-1-yl)phenyl)-2,3,3a,4,5,7a-hexahydro-1H-indole (cis-6ca)**

The title compound was prepared according to the general procedure as a brown oil (27.4 mg, 63% yield).  $^1\text{H}$  NMR (400 MHz,  $\text{CDCl}_3$ ):  $\delta$  = 7.35 (d,  $J$  = 8.8 Hz, 2H), 7.28 (d,  $J$  = 8.8 Hz, 2H), 7.19 (d,  $J$  = 8.4 Hz, 2H), 6.44 (d,  $J$  = 8.4 Hz, 2H), 5.99 (s, 1H), 4.05 (dd,  $J$  = 10.4, 6.8 Hz, 1H), 3.74 (d,  $J$  = 7.2 Hz, 1H), 3.22 (t,  $J$  = 6.4 Hz, 4H), 2.32-2.18 (m, 3H), 1.99-1.83 (m, 7H), 1.68-1.54 (m, 1H), 1.00 (s, 9H);  $^{13}\text{C}\{^1\text{H}\}$  NMR (101 MHz,  $\text{CDCl}_3$ ):  $\delta$  = 146.4, 141.2, 137.0, 132.3, 131.9, 131.6, 128.3, 127.1, 126.7, 111.3, 62.6, 57.9, 55.1, 47.7, 40.6, 36.1, 27.8, 25.6, 23.5, 22.2. HRMS (ESI<sup>+</sup>): calcd for  $\text{C}_{28}\text{H}_{36}\text{ClN}_2$   $[\text{M}+\text{H}]^+$  435.2562, found 435.2545.

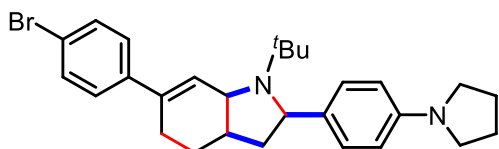

**(Cis)-6-(4-bromophenyl)-1-(tert-butyl)-2-(4-(pyrrolidin-1-yl)phenyl)-2,3,3a,4,5,7a-hexahydro-1H-indole (cis-6da)**

The title compound was prepared according to the general procedure as a brown oil (32.6 mg, 68% yield).  $^1\text{H}$  NMR (400 MHz,  $\text{CDCl}_3$ ):  $\delta$  = 7.43 (d,  $J$  = 8.4 Hz, 2H), 7.29 (d,  $J$  = 8.8 Hz, 2H), 7.19 (d,  $J$  = 8.8 Hz, 2H), 6.44 (d,  $J$  = 8.8 Hz, 2H), 6.00 (s, 1H), 4.05 (dd,  $J$  = 10.4, 6.4 Hz, 1H), 3.73 (d,  $J$  = 8.4 Hz, 1H), 3.22 (t,  $J$  = 6.4 Hz, 4H), 2.34-2.16 (m, 3H), 2.00-1.84 (m, 7H), 1.68-1.58 (m, 1H), 1.00 (s, 9H);  $^{13}\text{C}\{^1\text{H}\}$  NMR (101 MHz,  $\text{CDCl}_3$ ):  $\delta$  = 147.5, 146.4, 141.7, 137.0, 131.9, 131.7, 131.3, 127.1, 120.4, 111.3, 62.6, 58.0, 55.1, 47.7, 40.6, 36.0, 27.7, 25.6, 23.5, 22.2. HRMS (ESI<sup>+</sup>): calcd for  $\text{C}_{28}\text{H}_{36}\text{BrN}_2$  [ $\text{M}+\text{H}$ ]<sup>+</sup> 479.2057, found 479.2038.

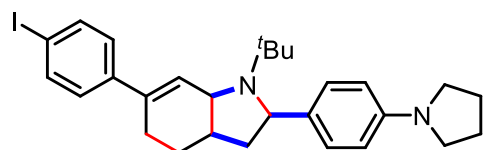

**(Cis)-1-(tert-butyl)-6-(4-iodophenyl)-2-(4-(pyrrolidin-1-yl)phenyl)-2,3,3a,4,5,7a-hexahydro-1H-indole (cis-6ea)**

The title compound was prepared according to the general procedure as a brown solid (30.5 mg, 58% yield).  $^1\text{H}$  NMR (400 MHz,  $\text{CDCl}_3$ ):  $\delta$  = 7.64 (d,  $J$  = 8.4 Hz, 2H), 7.18 (t,  $J$  = 8.8 Hz, 3H), 6.44 (d,  $J$  = 8.4 Hz, 2H), 6.01 (s, 1H), 4.05 (dd,  $J$  = 10.4, 6.4 Hz, 1H), 3.73 (d,  $J$  = 5.6 Hz, 1H), 3.23 (t,  $J$  = 6.4 Hz, 4H), 2.34-2.14 (m, 3H), 2.01-1.81 (m, 7H), 1.68-1.56 (m, 1H), 1.00 (s, 9H);  $^{13}\text{C}\{^1\text{H}\}$  NMR (101 MHz,  $\text{CDCl}_3$ ):  $\delta$  = 146.4, 142.3, 137.3, 137.0, 132.0, 131.7, 127.4, 127.1, 111.3, 91.8, 62.6, 57.9, 55.1, 47.7, 40.6, 36.0, 27.8, 25.6, 23.5, 22.0. HRMS (ESI<sup>+</sup>): calcd for  $\text{C}_{28}\text{H}_{36}\text{IN}_2$  [ $\text{M}+\text{H}$ ]<sup>+</sup> 527.1918, found 527.1901.

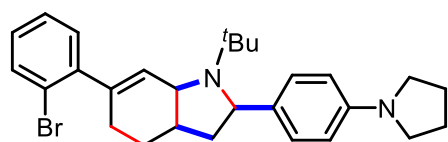

**(Cis)-6-(2-bromophenyl)-1-(tert-butyl)-2-(4-(pyrrolidin-1-yl)phenyl)-2,3,3a,4,5,7a-hexahydro-1H-indole (cis-6fa)**

The title compound was prepared according to the general procedure as a yellow solid (19.2 mg, 40% yield).  $^1\text{H}$  NMR (400 MHz,  $\text{CDCl}_3$ ):  $\delta$  = 7.54 (d,  $J$  = 7.6 Hz, 1H), 7.34 (d,  $J$  = 8.4 Hz, 2H), 7.27-7.25 (m, 1H), 7.20-7.18 (m, 1H), 7.11-7.08 (m, 1H), 6.52 (d,  $J$  = 8.4 Hz, 2H), 5.57 (s, 1H), 4.07 (dd,  $J$  = 10.4, 6.4 Hz, 1H), 3.74 (d,  $J$  = 6.8 Hz, 1H), 3.29-3.25 (m, 4H), 2.32-2.12 (m, 3H), 2.01-1.95 (m, 7H), 1.83-1.77 (m, 1H), 0.97 (s, 9H);  $^{13}\text{C}\{^1\text{H}\}$  NMR (101 MHz,  $\text{CDCl}_3$ ):  $\delta$  = 146.4, 145.4, 137.2, 135.8, 133.0, 132.6, 130.4, 128.1, 127.4, 127.3, 122.8, 111.2, 62.7, 57.3, 55.1, 47.8, 40.9, 36.1, 27.7, 25.6, 24.1, 23.6. HRMS (ESI<sup>+</sup>): calcd for  $\text{C}_{28}\text{H}_{36}\text{BrN}_2$  [ $\text{M}+\text{H}$ ]<sup>+</sup> 479.2057, found 479.2069.

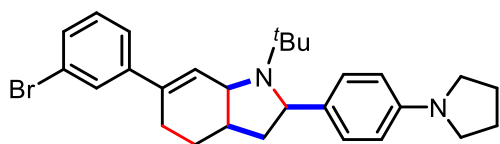

**(Cis)-6-(3-bromophenyl)-1-(tert-butyl)-2-(4-(pyrrolidin-1-yl)phenyl)-2,3,3a,4,5,7a-hexahydro-1H-indole (*cis*-6ga)**

The title compound was prepared according to the general procedure as a yellow solid (21.6 mg, 45% yield).  $^1\text{H}$  NMR (400 MHz,  $\text{CDCl}_3$ ):  $\delta$  = 7.57-7.53 (m, 1H), 7.37-7.31 (m, 2H), 7.23-7.15 (m, 3H), 6.45 (d,  $J$  = 8.8 Hz, 2H), 6.01 (s, 1H), 4.06 (dd,  $J$  = 10.4, 6.4 Hz, 1H), 3.75 (d,  $J$  = 5.6 Hz, 1H), 3.23 (t,  $J$  = 6.8 Hz, 4H), 2.36-2.15 (m, 3H), 2.02-1.82 (m, 7H), 1.67-1.55 (m, 1H), 1.01 (s, 9H);  $^{13}\text{C}\{^1\text{H}\}$  NMR (101 MHz,  $\text{CDCl}_3$ ):  $\delta$  = 146.5, 145.0, 136.9, 132.3, 131.8, 129.8, 129.5, 128.6, 127.1, 124.1, 122.6, 111.3, 62.6, 57.9, 55.1, 47.7, 40.6, 36.1, 27.8, 25.6, 23.5, 22.2. HRMS (ESI<sup>+</sup>): calcd for  $\text{C}_{28}\text{H}_{36}\text{BrN}_2$   $[\text{M}+\text{H}]^+$  479.2057, found 479.2074.

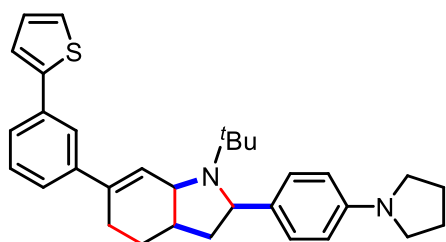

**(Cis)-N-(tert-butyl)-3'-methyl-1',2',5',6'-tetrahydro-[1,1':4',1''-terphenyl]-2'-amine (*cis*-6ha)**

The title compound was prepared according to the general procedure as a brown oil (21.6 mg, 45% yield).  $^1\text{H}$  NMR (400 MHz,  $\text{CDCl}_3$ ):  $\delta$  = 7.72 (s, 1H), 7.57-7.52 (m, 1H), 7.49-7.46 (m, 1H), 7.37-7.32 (m, 2H), 7.26-7.21 (m, 2H), 6.68 (d,  $J$  = 3.2 Hz, 1H), 6.50-6.42 (m, 3H), 6.06 (s, 1H), 4.08 (dd,  $J$  = 10.0, 6.8 Hz, 1H), 3.78 (d,  $J$  = 6.0 Hz, 1H), 3.22 (t,  $J$  = 6.4 Hz, 4H), 2.36-2.27 (m, 3H), 2.03-1.82 (m, 7H), 1.74-1.62 (m, 1H), 1.02 (s, 9H);  $^{13}\text{C}\{^1\text{H}\}$  NMR (101 MHz,  $\text{CDCl}_3$ ):  $\delta$  = 154.3, 146.4, 143.4, 142.0, 137.1, 132.9, 131.4, 130.8, 128.6, 127.2, 124.7, 122.2, 121.0, 111.7, 111.3, 105.0, 62.6, 58.0, 55.1, 47.7, 40.7, 36.2, 17.8, 25.6, 23.6, 22.5. HRMS (ESI<sup>+</sup>): calcd for  $\text{C}_{32}\text{H}_{39}\text{N}_2\text{S}$   $[\text{M}+\text{H}]^+$  483.2829, found 483.2839.

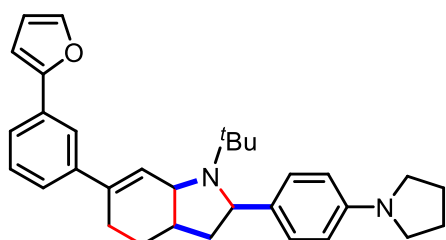

**(Cis)-1-(tert-butyl)-6-(3-(furan-2-yl)phenyl)-2-(4-(pyrrolidin-1-yl)phenyl)-2,3,3a,4,5,7a-hexahydro-1H-indole (cis-6ia)**

The title compound was prepared according to the general procedure as a brown oil (17.7 mg, 38% yield). <sup>1</sup>H NMR (400 MHz, CDCl<sub>3</sub>): δ = 7.65-7.63 (m, 1H), 7.51-7.46 (m, 1H), 7.37-7.32 (m, 3H), 7.28 (dd, *J* = 5.2, 1.2 Hz, 1H), 7.25-7.22 (m, 2H), 7.09 (dd, *J* = 5.2, 4.0 Hz, 1H), 6.46 (d, *J* = 8.8 Hz, 2H), 6.05 (s, 1H), 4.08 (dd, *J* = 10.4, 6.4 Hz, 1H), 3.78 (d, *J* = 5.6 Hz, 1H), 3.23 (t, *J* = 6.4 Hz, 4H), 2.38-2.24 (m, 3H), 2.03-1.86 (m, 7H), 1.73-1.62 (m, 1H), 1.02 (s, 9H); <sup>13</sup>C{<sup>1</sup>H} NMR (101 MHz, CDCl<sub>3</sub>): δ = 146.4, 144.9, 143.7, 137.1, 134.3, 132.8, 131.6, 128.8, 128.0, 127.2, 124.9, 124.8, 124.4, 123.4, 123.2, 111.3, 62.6, 58.0, 55.1, 47.7, 40.7, 36.2, 27.8, 25.6, 23.6, 22.5. HRMS (ESI<sup>+</sup>): calcd for C<sub>32</sub>H<sub>39</sub>N<sub>2</sub>O [M+H]<sup>+</sup> 467.3057, found 467.3077.

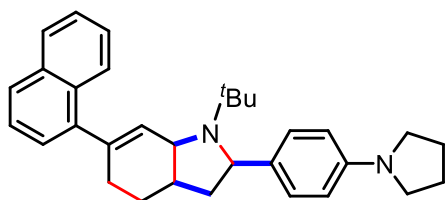

**(Cis)-1-(tert-butyl)-6-(naphthalen-1-yl)-2-(4-(pyrrolidin-1-yl)phenyl)-2,3,3a,4,5,7a-hexahydro-1H-indole (cis-6ja)**

The title compound was prepared according to the general procedure as a yellow solid (16.2 mg, 36% yield). <sup>1</sup>H NMR (400 MHz, CDCl<sub>3</sub>): δ = 8.06-8.04 (m, 1H), 7.85-7.83 (m, 1H), 7.75 (d, *J* = 8.0 Hz, 1H), 7.47-7.39 (m, 5H), 7.30-7.28 (m, 1H), 6.54 (d, *J* = 8.8 Hz, 2H), 5.73 (s, 1H), 4.15 (dd, *J* = 10.0, 6.8 Hz, 1H), 3.83 (d, *J* = 7.2 Hz, 1H), 3.32-3.29 (m, 4H), 2.40-2.15 (m, 3H), 2.11-1.86 (m, 8H), 0.98 (s, 9H); <sup>13</sup>C{<sup>1</sup>H} NMR (101 MHz, CDCl<sub>3</sub>): δ = 146.5, 143.0, 137.4, 134.1, 133.7, 133.5, 131.7, 128.3, 127.2, 126.8, 126.3, 125.7, 125.63, 125.60, 125.1, 111.4, 62.7, 57.5, 55.1, 47.8, 41.2, 36.2, 27.7, 26.0, 25.6, 24.0. HRMS (ESI<sup>+</sup>): calcd for C<sub>32</sub>H<sub>39</sub>N<sub>2</sub> [M+H]<sup>+</sup> 451.3108, found 451.3110.

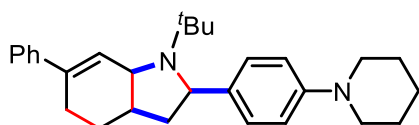

**(Cis)-1-(tert-butyl)-6-phenyl-2-(4-(piperidin-1-yl)phenyl)-2,3,3a,4,5,7a-hexahydro-1H-indole (cis-6ab)**

The title compound was prepared according to the general procedure as a yellow solid (24.9 mg, 60% yield). <sup>1</sup>H NMR (400 MHz, CDCl<sub>3</sub>): δ = 7.43 (d, *J* = 7.2 Hz, 2H), 7.33 (t, *J* = 8.0 Hz, 2H), 7.27-7.20 (m, 3H), 6.80 (d, *J* = 8.4 Hz, 2H), 6.01 (s, 1H), 4.06 (dd,

$J = 10.0, 6.4$  Hz, 1H), 3.77 (d,  $J = 7.2$  Hz, 1H), 3.11-3.02 (m, 4H), 2.33-2.23 (m, 3H), 2.02-1.83 (m, 3H), 1.73-1.62 (m, 5H), 1.56-1.49 (m, 2H), 0.99 (s, 9H);  $^{13}\text{C}\{^1\text{H}\}$  NMR (101 MHz,  $\text{CDCl}_3$ ):  $\delta = 150.6, 142.8, 141.2, 133.0, 131.0, 128.3, 127.0, 126.7, 125.5, 116.3, 62.6, 58.0, 55.1, 51.1, 40.6, 36.2, 27.7, 26.2, 24.4, 23.6, 22.3$ . HRMS (ESI<sup>+</sup>): calcd for  $\text{C}_{29}\text{H}_{39}\text{N}_2$   $[\text{M}+\text{H}]^+$  415.3108, found 415.3091.

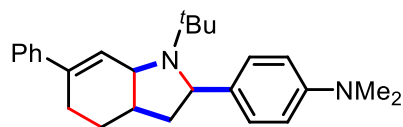

**(Cis)-4-(1-(tert-butyl)-6-phenyl-2,3,3a,4,5,7a-hexahydro-1H-indol-2-yl)-N,N-dimethylaniline (*cis*-6ac)**

The title compound was prepared according to the general procedure as a yellow solid (23.6 mg, 63% yield).  $^1\text{H}$  NMR (400 MHz,  $\text{CDCl}_3$ ):  $\delta = 7.44$  (d,  $J = 7.2$  Hz, 2H), 7.34 (t,  $J = 7.6$  Hz, 2H), 7.27-7.21 (m, 3H), 6.63 (d,  $J = 8.8$  Hz, 2H), 6.02 (s, 1H), 4.07 (dd,  $J = 10.0, 6.4$  Hz, 1H), 3.77 (d,  $J = 9.2$  Hz, 1H), 2.88 (s, 6H), 2.35-2.24 (m, 3H), 2.03-1.82 (m, 3H), 1.74-1.61 (m, 1H), 1.01 (s, 9H);  $^{13}\text{C}\{^1\text{H}\}$  NMR (101 MHz,  $\text{CDCl}_3$ ):  $\delta = 149.1, 142.8, 138.6, 133.0, 131.0, 128.3, 127.1, 126.7, 125.5, 112.6, 62.6, 58.0, 55.1, 41.0, 40.7, 36.2, 27.8, 23.7, 22.3$ . HRMS (ESI<sup>+</sup>): calcd for  $\text{C}_{26}\text{H}_{35}\text{N}_2$   $[\text{M}+\text{H}]^+$  375.2795, found 375.2779.

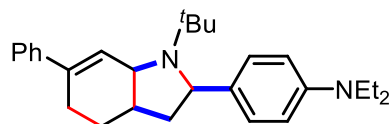

**(Cis)-4-(1-(tert-butyl)-6-phenyl-2,3,3a,4,5,7a-hexahydro-1H-indol-2-yl)-N,N-diethylaniline (*cis*-6ad)**

The title compound was prepared according to the general procedure as a yellow solid (28.2 mg, 70% yield).  $^1\text{H}$  NMR (400 MHz,  $\text{CDCl}_3$ ):  $\delta = 7.45$  (d,  $J = 7.8$  Hz, 2H), 7.34 (t,  $J = 7.4$  Hz, 2H), 7.25 (d,  $J = 7.4$  Hz, 1H), 7.18 (d,  $J = 8.8$  Hz, 2H), 6.56 (d,  $J = 8.8$  Hz, 2H), 6.02 (s, 1H), 4.05 (dd,  $J = 10.0, 6.4$  Hz, 1H), 3.76 (d,  $J = 7.4$  Hz, 1H), 3.33-3.23 (m, 4H), 2.35-2.23 (m, 3H), 2.01-1.86 (m, 3H), 1.73-1.63 (m, 1H), 1.11 (t,  $J = 7.1$  Hz, 6H), 1.01 (s, 9H);  $^{13}\text{C}\{^1\text{H}\}$  NMR (101 MHz,  $\text{CDCl}_3$ ):  $\delta = 146.3, 142.8, 137.3, 132.9, 131.1, 128.3, 127.3, 126.6, 125.5, 62.6, 58.0, 55.1, 44.5, 40.7, 36.2, 27.8, 23.7, 22.3, 12.8$ . HRMS (ESI<sup>+</sup>): calcd for  $\text{C}_{28}\text{H}_{38}\text{N}_2$   $[\text{M}+\text{H}]^+$  403.3108, found 403.3090.

## 6. Gram-Scale Reactions

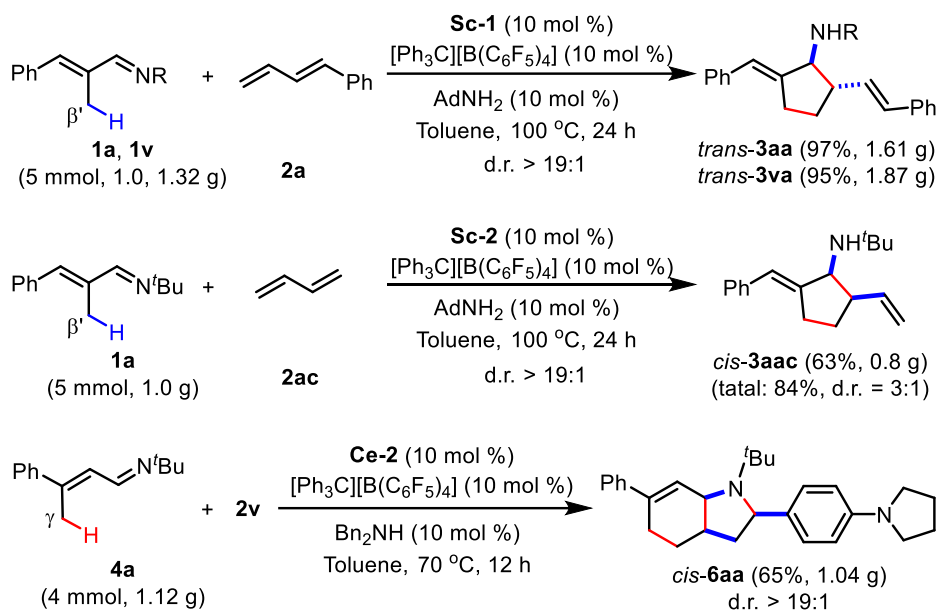

In a glovebox,  $[\text{Ph}_3\text{C}][\text{B}(\text{C}_6\text{F}_5)_4]$  (0.50 mmol) was added to a stirred toluene solution (40.0 mL) of **Sc-1** (0.50 mmol) in a Schlenk tube. After 5 min, 1-admantyl amine (0.50 mmol) was added to the Schlenk tube. After 5 min, to this tube was added  $\alpha,\beta$ -unsaturated aldimine **1a** or **1v** (5 mmol) and **2a** (15 mmol). After that, the tube was sealed, taken outside, and stirred at 100 °C for 24 h. Then, the mixture was concentrated and purified by silica gel column chromatography (hexane/EtOAc = 3:1) to give the desired product *trans*-**3aa** (97%, 1.61 g) or *trans*-**3av** (95%, 1.87 g).

In a glovebox,  $[\text{Ph}_3\text{C}][\text{B}(\text{C}_6\text{F}_5)_4]$  (0.50 mmol) was added to a stirred toluene solution (30.0 mL) of **Sc-2** (0.50 mmol) in a Schlenk tube. After 5 min, 1-admantyl amine (0.50 mmol) was added to the Schlenk tube. After 5 min, to this tube was added  $\alpha,\beta$ -unsaturated aldimine **1a** (5 mmol) and **2ac** (50 mmol). After that, the tube was sealed, taken outside, and stirred at 100 °C for 24 h. Then, the mixture was concentrated and purified by silica gel column chromatography (hexane/EtOAc = 10:1) to give the desired product *cis*-**3aac** (63%, 0.8 g) and *trans*-**3aac** (20%, 0.25 g).

In a glovebox,  $[\text{Ph}_3\text{C}][\text{B}(\text{C}_6\text{F}_5)_4]$  (0.4 mmol) was added to a stirred toluene solution (30.0 mL) of **Ce-2** (0.4 mmol) in a Schlenk tube. After 5 min, *N,N*-dibenzylamine (0.40 mmol) was added to the Schlenk tube. After 5 min, to this tube was added  $\alpha,\beta$ -unsaturated aldimine **4a** (4 mmol) and **2v** (16 mmol). After that, the tube was sealed, taken outside, and stirred at 70 °C for 12 h. Then, the mixture was concentrated and purified by silica gel column chromatography (hexane/EtOAc = 15:1) to give the desired product *cis*-**6aa** (65%, 1.04 g).

## 7. Transformations of *trans*-3aa, *trans*-3va and *cis*-3aac

### Transformation of *trans*-3aa

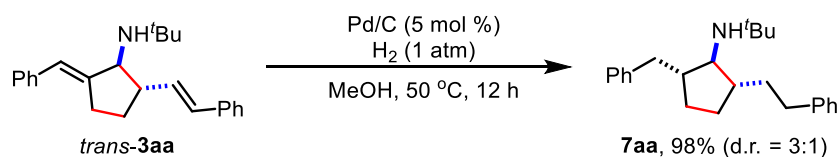

Compound *trans*-3aa (0.2 mmol) and Pd/C (10 wt%, 0.01 mmol) in methanol (2.0 mL, 0.1 M) were stirred at 50 °C under hydrogen atmosphere (balloon) for 12 h. The resulting mixture was passed through a plug of silica, and then concentrated in vacuo to give the mixture of diastereomers (98%). The diastereomeric ratio was determined based on crude  $^1\text{H}$  NMR (d.r. = 3:1), and each diastereoisomer was separated by flash column chromatography. Both isomers were isolated as a colorless oil.

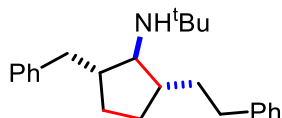

### (*Trans,trans*)-2-benzyl-*N*-(*tert*-butyl)-5-phenethylcyclopentan-1-amine (7aa)

The title compound was prepared according to the general procedure as a colorless soild (49.7 mg, 74% yield).  $^1\text{H}$  NMR (400 MHz,  $\text{CDCl}_3$ ):  $\delta$  = 7.31-7.25 (m, 4H), 7.20-7.16 (m, 6H), 2.88 (dd,  $J$  = 13.6, 5.2 Hz, 1H), 2.74-2.67 (m, 1H), 2.58-2.55 (m, 2H), 2.46-2.40 (m, 1H), 1.96-1.82 (m, 4H), 1.68-1.55 (m, 3H), 1.43-1.29 (m, 2H), 1.05 (s, 9H);  $^{13}\text{C}\{^1\text{H}\}$  NMR (101 MHz,  $\text{CDCl}_3$ ):  $\delta$  = 142.8, 141.7, 129.0, 128.5, 128.43, 128.37, 125.9, 125.8, 65.7, 51.2, 50.8, 49.1, 40.7, 37.1, 35.2, 30.3, 29.4, 29.2. HRMS (ESI $^+$ ): calcd for  $\text{C}_{24}\text{H}_{34}\text{N}$  [ $\text{M}+\text{H}$ ] $^+$  336.2686, found 336.2692.

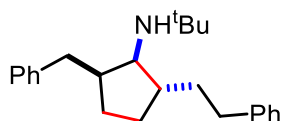

### (*Trans,cis*)-2-benzyl-*N*-(*tert*-butyl)-5-phenethylcyclopentan-1-amine (7aa')

The title compound was prepared according to the general procedure as a colorless soild (16.1 mg, 24% yield).  $^1\text{H}$  NMR (400 MHz,  $\text{CDCl}_3$ ):  $\delta$  = 7.32-7.26 (m, 4H), 7.20-7.15 (m, 6H), 3.02 (d,  $J$  = 12.8 Hz 1H), 2.77-2.68 (m, 2H), 2.59-2.51 (m, 1H), 2.21-2.12 (m, 2H), 1.99-1.91 (m, 2H), 1.64-1.51 (m, 2H), 1.45-1.33 (m, 3H), 1.11 (s, 9H);  $^{13}\text{C}\{^1\text{H}\}$  NMR (101 MHz,  $\text{CDCl}_3$ ):  $\delta$  = 143.0, 142.8, 129.2, 128.44, 128.41,

128.3, 125.7, 125.5, 62.4, 50.8, 45.1, 44.3, 36.9, 35.0, 30.3, 29.8, 27.3, 27.1. HRMS (ESI<sup>+</sup>): calcd for C<sub>24</sub>H<sub>34</sub>N [M+H]<sup>+</sup> 336.2686, found 336.2693.

### Transformations of *trans*-**3va**

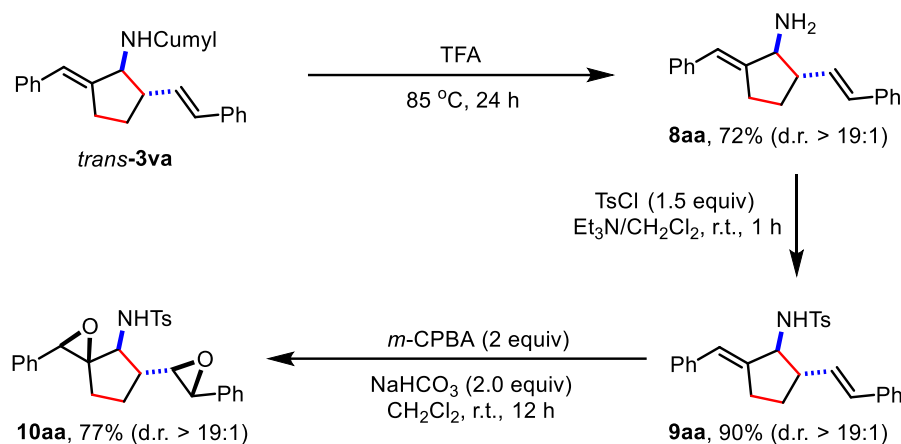

The *trans*-**3va** (0.5 mmol) was placed in a Schlenk tube, and TFA was subsequently added to the tube. The mixture was stirred at 85 °C for 24 h. After cooling to room temperature, the reaction was diluted with 10% NaOH aq. and extracted with DCM (5 mL x 3). The combined organic extracts were dried over anhydrous Na<sub>2</sub>SO<sub>4</sub> and concentrated in vacuo. The crude product was purified by PLC (DCM/MeOH = 15:1) to afford the desired product **8aa** (72% yield).

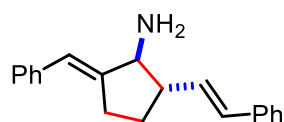

### (*Trans*)-2-((*E*)-benzylidene)-5-((*E*)-styryl)cyclopentan-1-amine (**8aa**)

The title compound was prepared according to the general procedure as a yellow solid (99.1 mg, 72% yield). <sup>1</sup>H NMR (400 MHz, CDCl<sub>3</sub>): δ = 7.40-7.29 (m, 8H), 7.24-7.18 (m, 2H), 6.54-6.50 (m, 2H), 6.19 (dd, *J* = 15.6, 8.4 Hz, 1H), 3.46 (d, *J* = 10.0 Hz, 1H), 2.85-2.67 (m, 2H), 2.23-2.04 (m, 2H), 1.71-1.60 (m, 1H), 1.54 (brs, 2H); <sup>13</sup>C{<sup>1</sup>H} NMR (101 MHz, CDCl<sub>3</sub>): δ = 147.6, 138.1, 137.3, 132.3, 131.4, 128.7, 128.4, 127.4, 126.3, 126.2, 121.5, 63.3, 53.9, 29.6, 29.2. HRMS (ESI<sup>+</sup>): calcd for C<sub>20</sub>H<sub>22</sub>N [M+H]<sup>+</sup> 276.1747, found 276.1757.

Compound **8aa** (0.3 mmol) and TsCl (0.3 mmol) were dissolved in DCM (2 mL, 0.1 M). To this solution was added Et<sub>3</sub>N (0.8 mmol), and the resulting solution was stirred at room temperature for 1 h. Then the reaction was diluted with ethyl acetate (5.0 mL). The organic phase was concentrated in vacuo. The crude residue was purified by flash column chromatography (PE/EA = 2:1) to afford **9aa** (90% yield).

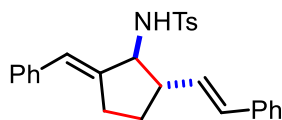

**(*Trans*)-*N*-(2-((*E*)-benzylidene)-5-((*E*)-styryl)cyclopentyl)-4-methylbenzenesulfonamide (**9aa**)**

The title compound was prepared according to the general procedure as a yellow solid (116.0 mg, 90% yield).  $^1\text{H}$  NMR (400 MHz,  $\text{CDCl}_3$ ):  $\delta$  = 7.18 (d,  $J$  = 8.4 Hz, 2H), 7.34-7.27 (m, 6H), 7.12-7.10 (m, 2H), 7.02 (d,  $J$  = 8.4 Hz, 2H), 6.49 (d,  $J$  = 2.4 Hz, 1H), 6.29 (d,  $J$  = 16.0 Hz, 1H), 5.70 (dd,  $J$  = 16.0, 8.4 Hz, 1H), 4.61 (d,  $J$  = 8.8 Hz, 1H), 4.04 (t,  $J$  = 9.6 Hz, 1H), 2.79-2.60 (m, 2H), 2.41-2.32 (m, 1H), 2.20 (s, 3H), 2.04-1.96 (m, 1H), 1.66-1.58 (m, 1H);  $^{13}\text{C}\{^1\text{H}\}$  NMR (101 MHz,  $\text{CDCl}_3$ ):  $\delta$  = 143.4, 142.9, 137.3, 137.0, 132.5, 131.7, 129.9, 129.6, 128.54, 128.45, 128.4, 127.4, 127.2, 126.8, 126.3, 124.3, 64.4, 50.5, 29.8, 28.7, 21.5. HRMS (ESI $^+$ ): calcd for  $\text{C}_{27}\text{H}_{28}\text{NO}_2\text{S}$   $[\text{M}+\text{H}]^+$  430.1836, found 430.1830.

Compound **9aa** (0.2 mmol) was dissolved in  $\text{CH}_2\text{Cl}_2$  (3 mL), and  $\text{NaHCO}_3$  (0.4 mmol) was added to the resulting solution. The reaction mixture was stirred at room temperature for 5 min and then *m*-CPBA (75 wt %, 0.4 mmol) was added. The resultant solution was stirred at room temperature for 12 h and then solid  $\text{Na}_2\text{SO}_3$  was added until starch-iodide paper indicated that no *m*-CPBA was present. The resultant mixture was diluted with 2.0 M aq.  $\text{NaOH}$  (3 mL) and extracted with  $\text{CHCl}_3$  ( $2 \times 10$  mL). The combined organics were dried and concentrated in vacuo. The crude residue was purified by flash column chromatography (DCM/MeOH = 50:1-20:1) to afford the compound **10aa** (77% yield).

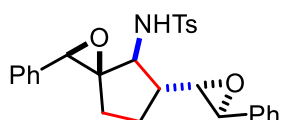

**(*Trans*)-4-methyl-*N*-(2-phenyl-5-((3-phenyloxiran-2-yl)-1-oxaspiro[2.4]heptan-4-yl)benzenesulfonamide (**10aa**)**

The title compound was prepared according to the general procedure as a yellow solid (71.1 mg, 77% yield).  $^1\text{H}$  NMR (400 MHz,  $\text{CDCl}_3$ ):  $\delta$  = 7.81 (d,  $J$  = 8.0 Hz, 2H), 7.33-7.27 (m, 8H), 7.21-7.19 (m, 2H), 6.97 (dd,  $J$  = 8.0, 1.6 Hz, 2H), 4.94 (d,  $J$  = 8.0 Hz, 1H), 3.75 (dd,  $J$  = 10.8, 8.0 Hz, 1H), 3.70 (m, 1H), 3.12 (s, 1H), 2.98-2.97 (m, 1H), 2.45 (s, 3H), 2.21-2.14 (m, 1H), 1.87-1.79 (m, 1H), 1.75-1.69 (m, 2H), 1.41-1.35 (m, 1H);  $^{13}\text{C}\{^1\text{H}\}$  NMR (101 MHz,  $\text{CDCl}_3$ ):  $\delta$  = 143.9, 137.8, 137.2, 130.0, 128.41, 128.36, 128.2, 128.1, 127.3, 126.1, 125.9, 134.9, 69.1, 62.1, 59.3, 57.6, 57.0, 47.4,

25.3, 21.7, 21.0. HRMS (ESI<sup>+</sup>): calcd for C<sub>27</sub>H<sub>28</sub>NO<sub>4</sub>S [M+H]<sup>+</sup> 462.1734, found 462.1738.

### Transformations of *cis*-**3aac**

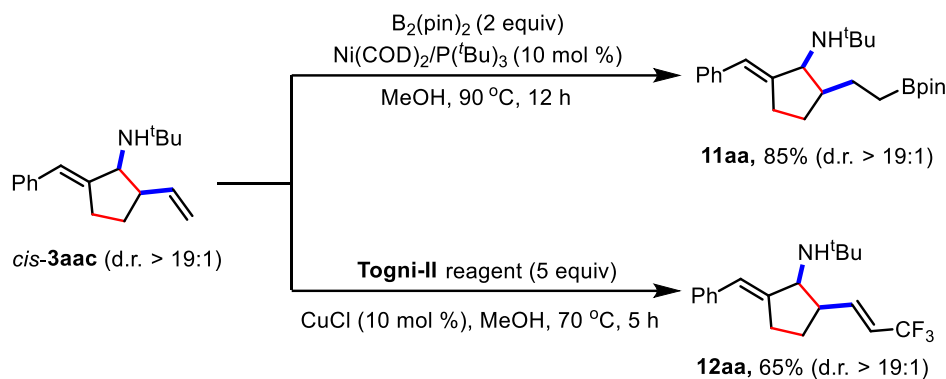

Compound *cis*-**3aac** (0.2 mmol) and B<sub>2</sub>Pin<sub>2</sub> (47.0 mg, 0.4 mmol, 2.0 eq.) were added to the MeOH solution of Ni(COD)<sub>2</sub> (10 mol%) and P(<sup>t</sup>Bu)<sub>3</sub> (10 mol%). The resulting solution was stirred at 90 °C for 12 h. The reaction mixture was concentrated in vacuo. The crude residue was purified by flash column chromatography (PE/EA = 2:1) to afford the compound **11aa** (85% yield).

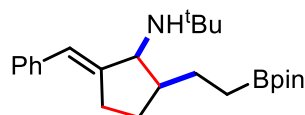

### (*Cis*)-2-((*E*)-benzylidene)-*N*-(*tert*-butyl)-5-(2-(4,4,5,5-tetramethyl-1,3,2-dioxaborolan-2-yl)ethyl)cyclopentan-1-amine (**11aa**)

The title compound was prepared according to the general procedure as a yellow solid (65.2 mg, 85% yield). <sup>1</sup>H NMR (400 MHz, CDCl<sub>3</sub>): δ = 7.35-7.27 (m, 4H), 7.14 (t, *J* = 7.2 Hz, 1H), 6.44 (d, *J* = 2.4 Hz, 1H), 3.64 (d, *J* = 5.6 Hz, 1H), 2.56-2.54 (m, 2H), 1.87-1.74 (m, 2H), 1.68-1.63 (m, 1H), 1.57-1.48 (m, 1H), 1.22 (s, 12H), 1.15 (s, 9H), 0.90-0.79 (m, 2H), 0.71-0.63 (m, 1H); <sup>13</sup>C{<sup>1</sup>H} NMR (101 MHz, CDCl<sub>3</sub>): δ = 149.0, 138.7, 128.3, 128.2, 125.7, 120.8, 83.0, 62.0, 50.6, 45.0, 30.5, 26.9, 25.6, 25.0, 24.9, 20.3; <sup>11</sup>B NMR (193 MHz, CDCl<sub>3</sub>): δ = 30.1. HRMS (ESI<sup>+</sup>): calcd for C<sub>24</sub>H<sub>39</sub>BNO<sub>2</sub> [M+H]<sup>+</sup> 384.3069, found 384.3071.

Compound *cis*-**3aac** (0.2 mmol), Togni-II reagent (1.0 mmol) and CuCl (10 mol%) were placed in a Schlenk tube, and MeOH (1 mL) was subsequently added to the tube. The resulting solution was stirred at 70 °C for 5 h. Then the reaction mixture was

concentrated in vacuo. The crude residue was purified by flash column chromatography (PE/EA = 20:1) to afford the compound **12aa** (65% yield).

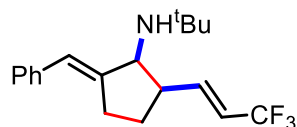

**(*Trans*)-2-((*E*)-benzylidene)-*N*-(*tert*-butyl)-5-((*E*)-3,3,3-trifluoroprop-1-en-1-yl)clopentan-1-amine (**12aa**)**

The title compound was prepared according to the general procedure as a yellow solid (67.9 mg, 65% yield).  $^1\text{H}$  NMR (600 MHz,  $\text{CDCl}_3$ ):  $\delta$  = 7.36-7.31 (m, 4H), 7.19 (t,  $J$  = 6.6 Hz, 1H), 6.52 (t,  $J$  = 2.4 Hz, 1H), 6.24 (dd,  $J$  = 15.6, 9.6 Hz, 1H), 5.66-5.62 (m, 1H), 3.76 (d,  $J$  = 6.6 Hz, 1H), 2.75-2.66 (m, 3H), 1.98-1.91 (m, 1H), 1.84-1.80 (m, 1H), 1.13 (s, 9H);  $^{13}\text{C}\{^1\text{H}\}$  NMR (101 MHz,  $\text{CDCl}_3$ ):  $\delta$  = 146.6, 140.9(q,  $J$  = 4.0 Hz), 138.1, 128.5, 128.4, 126.3, 122.8, 119.9, 119.7, 61.9, 50.8, 46.5, 30.5, 27.9, 27.2.  $^{19}\text{F}$  NMR (565 MHz,  $\text{CDCl}_3$ ):  $\delta$  = 63.56; HRMS (ESI $^+$ ): calcd for  $\text{C}_{29}\text{H}_{39}\text{N}_2$   $[\text{M}+\text{H}]^+$  324.1934, found 324.1935.

## 8. Mechanistic Investigation

### 8.1 Mechanistic investigation for the *trans*-diastereoselective [3 + 2] annulation of **1a** with **2a**

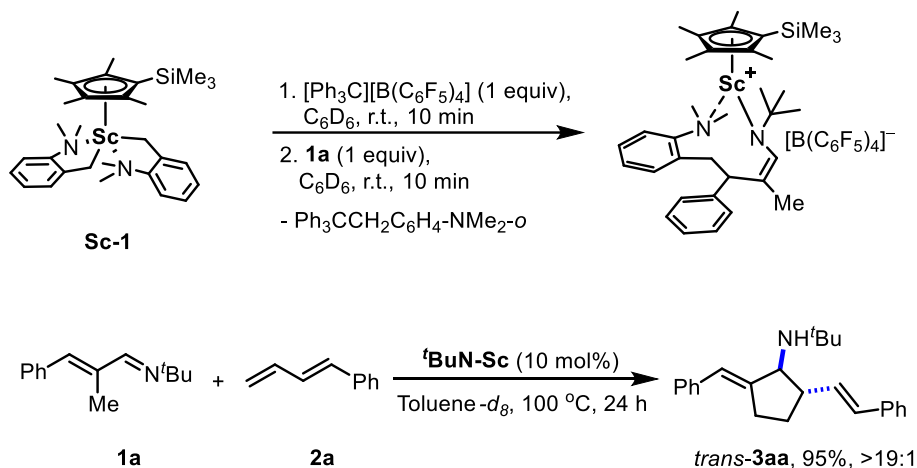

In a 2-mL flask, **Sc-1** (101 mg, 0.2 mmol) was mixed with 1 equiv of  $[\text{Ph}_3\text{C}][\text{B}(\text{C}_6\text{F}_5)_4]$  (184.0 mg, 0.2 mmol) in  $\text{C}_6\text{D}_6$  (3 mL), and the mixture was stirred at room temperature for 10 min. 1.0 equiv of **1a** (40.0 mg, 0.21 mmol) was then added to the mixture. In 10 minutes, a red oily product deposited to the bottom of the flask. The upper clear solution was measured by  $^1\text{H}$  NMR, which showed the disappearance

of the starting chemicals and formation of  $\text{Ph}_3\text{CCH}_2\text{C}_6\text{H}_4\text{NMe}_2\text{-}o$ .<sup>8</sup> The oily red product was washed with a small amount of  $\text{C}_6\text{D}_6$  and hexane, yielding orange powder after drying in vacuum. The orange powder was determined to be the cationic amido-Sc complex **'BuN-Sc** (85% yield) by NMR spectroscopy. The complex **'BuN-Sc**:  $^1\text{H}$  NMR (500 MHz,  $\text{C}_6\text{D}_5\text{Cl}$ , 25 °C):  $\delta = 7.20\text{-}7.14$  (m, 2H), 7.12-7.07 (m, 4H), 7.00-6.94 (m, 3H), 6.59 (s, 1H), 4.29 (d,  $J = 13.5$  Hz, 1H), 3.69-3.62 (m, 1H), 2.98 (s, 3H), 2.65 (s, 3H), 1.93 (s, 3H);  $^{13}\text{C}\{^1\text{H}\}$  NMR (126 MHz,  $\text{C}_6\text{D}_5\text{Cl}$ , 25 °C):  $\delta = 150.9, 149.9$  (m), 148.0 (m), 140.8, 139.7 (m), 137.8 (m), 136.1, 136.0, 135.9 (m), 134.9, 133.2, 132.6, 132.1, 131.0, 126.6, 120.8, 108.8, 58.5, 47.0, 42.0, 30.2, 25.4, 15.7, 15.5, 15.1, 12.8, 12.4, 1.3;  $^{19}\text{F}$  NMR (377.5 MHz,  $\text{C}_6\text{D}_5\text{Cl}$ ):  $\delta = -132.30$  (8F), -162.94 (4F), -166.77 (8F);  $^{11}\text{B}$  NMR (128 MHz,  $\text{C}_6\text{D}_5\text{Cl}$ ):  $\delta = -17.68$ . The cationic enamido scandium complex **'BuN-Sc** showed catalytic activity towards the annulation of **1a** with **2a**.

## 8.2 Proposed reaction mechanism for *cis*-diastereoselective [3 + 2] annulation of **1a** with **2ac** by **Sc-2**

In the reaction of **2ac** by **Sc-2**, the  $\beta^1$ -allylic  $\text{C}(\text{sp}^3)\text{-H}$  activation (deprotonation) of the coordinated **1a** by the Sc-N bond in **M** would form a  $\pi$ -allyl scandium species **N** bearing an  $\text{AdNH}_2$  ligand. The 1,2-insertion of **2ac** into the less sterically hindered Sc-alkyl bond in **N** could afford a major  $\sigma$ -allyl species **O** and a minor  $\sigma$ -allyl species **O'** via a major transition state **TSIII** and a minor transition state **TSIII'**. An interaction between the Sc atom and the two C=C units of **2ac** could be possible in the major transition state **TSIII** because of much smaller steric hindrance of **2ac** than that of **2a**. This interaction would promote the *cis*-selective annulation reaction. The intramolecular addition (cyclization) of the Sc-allyl bond to the C=N unit in **O** and **O'** would give **P** and **P'**. The subsequent intramolecular amido exchange reaction between the Sc-N bond and an N-H bond of  $\text{AdNH}_2$  in **P** and **P'**, followed by the coordination of **1a** to the Sc atom would regenerate **M** with the release of the final annulation products *cis*-**3aac** as a major product and *trans*-**3aac** as a minor product.

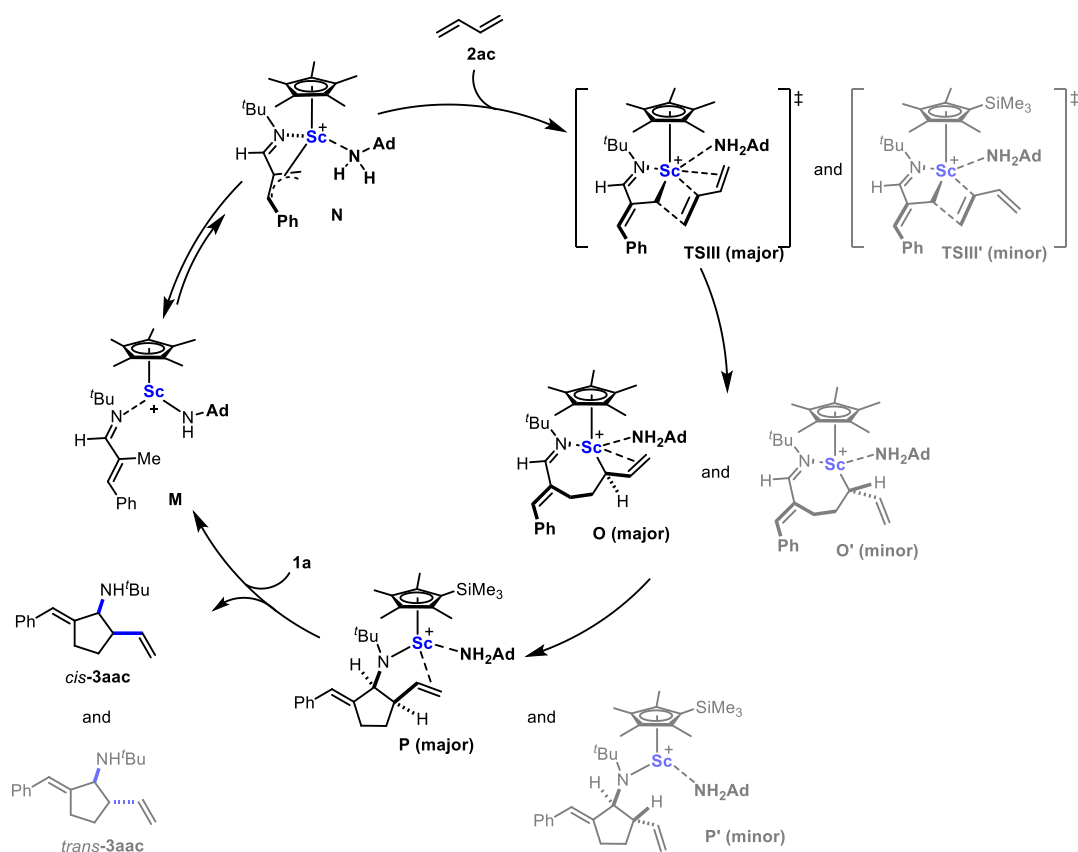

**Fig. S1** Proposed reaction mechanism for *cis*-diastereoselective [3+2] annulation of **1a** with **2ac** by **Sc-2**.

## 9. X-ray Crystallographic Studies

Suitable crystals for an X-ray diffraction study were obtained as described below. These were manipulated under a microscope in a glovebox filled with nitrogen. Data collections were performed at  $-100\text{ }^{\circ}\text{C}$  on a Bruker D8 QUEST diffractometer equipped with a CMOS area detector, using a  $\text{I}\mu\text{S}$  (Incoatec Microfocus Source) microfocus sealed tube with  $\text{Mo K}\alpha$  radiation ( $\lambda = 0.71073\text{ \AA}$ ) at 173 K. The Bravais lattice and the unit cell parameters were determined by the Bruker APEX3 software package.<sup>9</sup> The raw frame data were processed, and absorption corrections were done using SAINT and SADABS embedded in Bruker APEX3 to yield the reflection data (hkl) file. All of the structures were solved using SIR-2014<sup>10</sup> and SHELXL-2017.<sup>11</sup> Structural refinement was performed using the WINGX-Version 2014.1 system,<sup>12</sup> on  $F^2$  anisotropically for all of the non-hydrogen atoms by the fullmatrix least-squares method. The analytical scattering factors for neutral atoms were used throughout the analysis. The hydrogen atoms were placed at the calculated positions and were included in the structure calculation without further refinement of the parameters. The residual electron densities were of no chemical significance. CCDC numbers 2492573 (for *trans*-**3aa**), 2492574 (for *trans*-**3ha**), 2492575 (for *cis*-**3dac**), 2492576 (for

*cis-6ac*) and 2492577 (for *cis-6ad*) contain the supplementary crystallographic data for this paper. These data can be obtained free of charge from The Cambridge Crystallographic Data Centre via [www.ccdc.cam.ac.uk/data\\_request/cif](http://www.ccdc.cam.ac.uk/data_request/cif).

**X-ray structure of *trans-3aa*** (CCDC: 2492573)

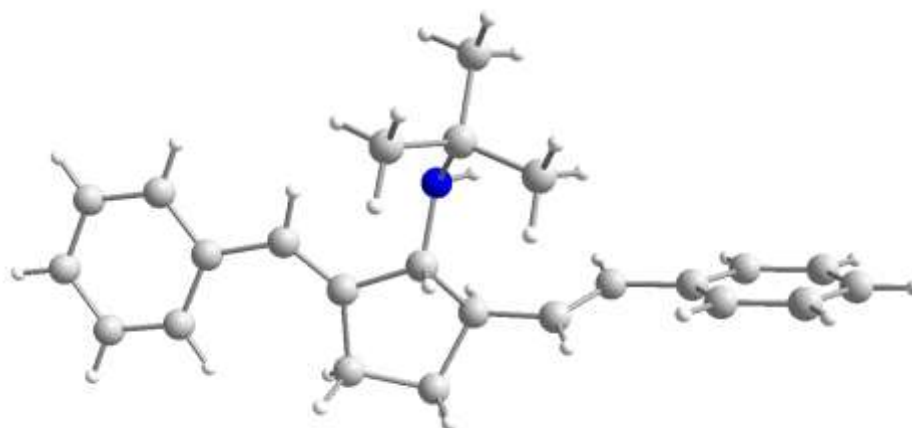

**Fig. S2** X-ray structure of *trans-3aa*

**Table 1** Crystal data and structure refinement for *trans-3aa*.

|                                    |                                          |
|------------------------------------|------------------------------------------|
| Identification code                | exp_271_auto                             |
| Empirical formula                  | C <sub>24</sub> H <sub>29</sub> N        |
| Formula weight                     | 331.48                                   |
| Temperature/K                      | 100.0(2)                                 |
| Crystal system                     | monoclinic                               |
| Space group                        | P2 <sub>1</sub> /n                       |
| a/Å                                | 10.0735(2)                               |
| b/Å                                | 8.6334(2)                                |
| c/Å                                | 22.3530(6)                               |
| α/°                                | 90                                       |
| β/°                                | 95.243(2)                                |
| γ/°                                | 90                                       |
| Volume/Å <sup>3</sup>              | 1935.87(8)                               |
| Z                                  | 4                                        |
| ρ <sub>calc</sub> /cm <sup>3</sup> | 1.137                                    |
| μ/mm <sup>-1</sup>                 | 0.065                                    |
| F(000)                             | 720.0                                    |
| Crystal size/mm <sup>3</sup>       | 0.3 × 0.2 × 0.2                          |
| Radiation                          | Mo Kα (λ = 0.71073)                      |
| 2θ range for data collection/      | 3.66 to 64.736                           |
| Index ranges                       | -14 ≤ h ≤ 14, -12 ≤ k ≤ 12, -33 ≤ l ≤ 27 |

|                                                |                                                                  |
|------------------------------------------------|------------------------------------------------------------------|
| Reflections collected                          | 25838                                                            |
| Independent reflections                        | 6199 [ $R_{\text{int}} = 0.0299$ , $R_{\text{sigma}} = 0.0266$ ] |
| Data/restraints/parameters                     | 6199/0/233                                                       |
| Goodness-of-fit on $F^2$                       | 1.056                                                            |
| Final R indexes [ $I \geq 2\sigma(I)$ ]        | $R_1 = 0.0434$ , $wR_2 = 0.1196$                                 |
| Final R indexes [all data]                     | $R_1 = 0.0561$ , $wR_2 = 0.1299$                                 |
| Largest diff. peak/hole / $e \text{ \AA}^{-3}$ | 0.43/-0.30                                                       |

**X-ray structure of *trans*-3ha** (CCDC: 2492574)

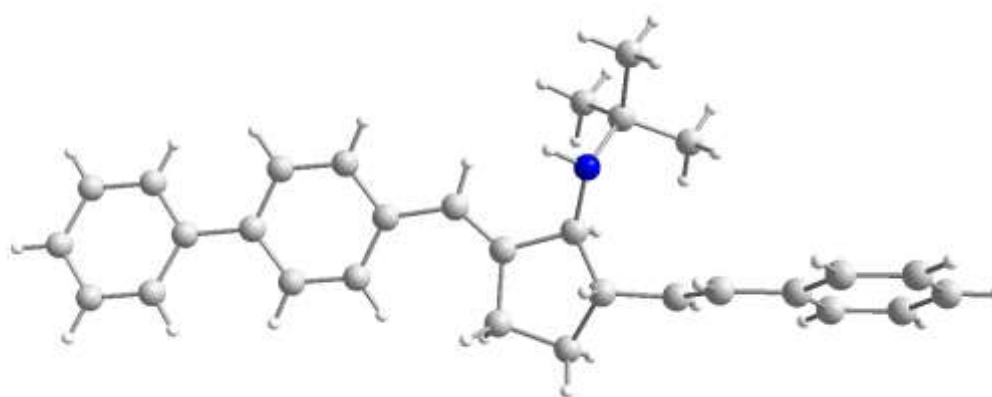

**Fig. S3** X-ray structure of *trans*-3ha

**Table 2** Crystal data and structure refinement for *trans*-3ha.

|                                  |                 |
|----------------------------------|-----------------|
| Identification code              | exp_274_auto    |
| Empirical formula                | $C_{30}H_{33}N$ |
| Formula weight                   | 407.57          |
| Temperature/K                    | 100.0(2)        |
| Crystal system                   | monoclinic      |
| Space group                      | $P2_1/n$        |
| $a/\text{\AA}$                   | 15.0380(3)      |
| $b/\text{\AA}$                   | 7.9426(2)       |
| $c/\text{\AA}$                   | 20.6714(4)      |
| $\alpha/^\circ$                  | 90              |
| $\beta/^\circ$                   | 109.062(2)      |
| $\gamma/^\circ$                  | 90              |
| Volume/ $\text{\AA}^3$           | 2333.62(9)      |
| Z                                | 4               |
| $\rho_{\text{calc}}/\text{cm}^3$ | 1.160           |

|                                                |                                                               |
|------------------------------------------------|---------------------------------------------------------------|
| $\mu/\text{mm}^{-1}$                           | 0.066                                                         |
| F(000)                                         | 880.0                                                         |
| Crystal size/ $\text{mm}^3$                    | $0.2 \times 0.2 \times 0.15$                                  |
| Radiation                                      | Mo $K\alpha$ ( $\lambda = 0.71073$ )                          |
| $2\theta$ range for data collection/           | 5.536 to 64.738                                               |
| Index ranges                                   | $-21 \leq h \leq 22, -11 \leq k \leq 10, -31 \leq l \leq 30$  |
| Reflections collected                          | 43354                                                         |
| Independent reflections                        | 7571 [ $R_{\text{int}} = 0.0322, R_{\text{sigma}} = 0.0227$ ] |
| Data/restraints/parameters                     | 7571/0/287                                                    |
| Goodness-of-fit on $F^2$                       | 1.065                                                         |
| Final R indexes [ $I \geq 2\sigma(I)$ ]        | $R_1 = 0.0461, wR_2 = 0.1283$                                 |
| Final R indexes [all data]                     | $R_1 = 0.0570, wR_2 = 0.1360$                                 |
| Largest diff. peak/hole / $e \text{ \AA}^{-3}$ | 0.38/-0.21                                                    |

**X-ray structure of *cis*-3dac** (CCDC: 2492575)

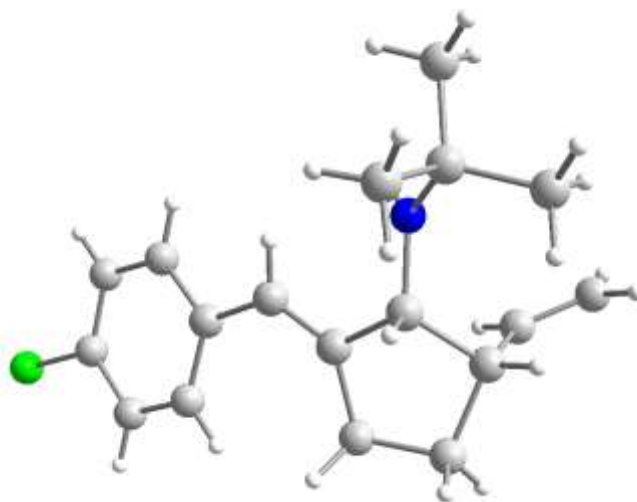

**Fig. S4** X-ray structure of *cis*-3dac

**Table 3** Crystal data and structure refinement for *cis*-3dac.

|                     |                                        |
|---------------------|----------------------------------------|
| Identification code | exp_273_auto                           |
| Empirical formula   | $\text{C}_{18}\text{H}_{24}\text{ClN}$ |
| Formula weight      | 289.83                                 |
| Temperature/K       | 99.95(18)                              |
| Crystal system      | monoclinic                             |
| Space group         | $P2_1/c$                               |

|                                             |                                                                |
|---------------------------------------------|----------------------------------------------------------------|
| a/Å                                         | 5.44060(10)                                                    |
| b/Å                                         | 22.7821(4)                                                     |
| c/Å                                         | 13.0809(3)                                                     |
| $\alpha$ /°                                 | 90                                                             |
| $\beta$ /°                                  | 99.810(2)                                                      |
| $\gamma$ /°                                 | 90                                                             |
| Volume/Å <sup>3</sup>                       | 1597.65(6)                                                     |
| Z                                           | 4                                                              |
| $\rho_{\text{calc}}/\text{cm}^3$            | 1.205                                                          |
| $\mu/\text{mm}^{-1}$                        | 0.230                                                          |
| F(000)                                      | 624.0                                                          |
| Crystal size/mm <sup>3</sup>                | 0.2 × 0.2 × 0.2                                                |
| Radiation                                   | Mo K $\alpha$ ( $\lambda$ = 0.71073)                           |
| 2 $\Theta$ range for data collection/       | 4.772 to 64.374                                                |
| Index ranges                                | -5 ≤ h ≤ 7, -33 ≤ k ≤ 32, -19 ≤ l ≤ 18                         |
| Reflections collected                       | 23632                                                          |
| Independent reflections                     | 5153 [ $R_{\text{int}}$ = 0.0339, $R_{\text{sigma}}$ = 0.0289] |
| Data/restraints/parameters                  | 5153/0/184                                                     |
| Goodness-of-fit on F <sup>2</sup>           | 1.051                                                          |
| Final R indexes [ $I \geq 2\sigma(I)$ ]     | $R_1$ = 0.0404, $wR_2$ = 0.1095                                |
| Final R indexes [all data]                  | $R_1$ = 0.0507, $wR_2$ = 0.1162                                |
| Largest diff. peak/hole / e Å <sup>-3</sup> | 0.84/-0.81                                                     |

**X-ray structure of *cis*-6ac** (CCDC: 2492576)

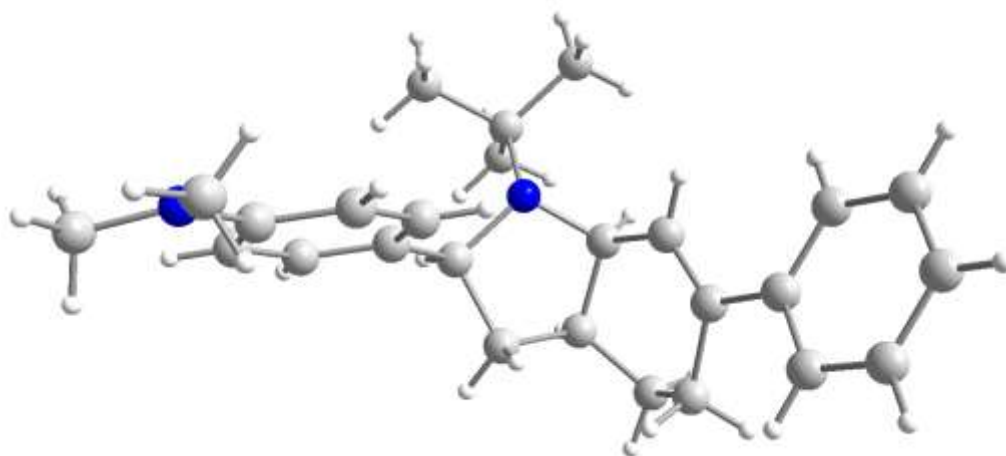

**Fig. S5** X-ray structure of *cis-6ac*

**Table 4** Crystal data and structure refinement for *cis-6ac*.

|                                             |                                                               |
|---------------------------------------------|---------------------------------------------------------------|
| Identification code                         | exp_272_auto                                                  |
| Empirical formula                           | C <sub>26</sub> H <sub>34</sub> N <sub>2</sub>                |
| Formula weight                              | 374.55                                                        |
| Temperature/K                               | 100.00(10)                                                    |
| Crystal system                              | triclinic                                                     |
| Space group                                 | P-1                                                           |
| a/Å                                         | 9.3215(3)                                                     |
| b/Å                                         | 11.3772(4)                                                    |
| c/Å                                         | 11.9103(5)                                                    |
| α/°                                         | 66.962(3)                                                     |
| β/°                                         | 71.581(3)                                                     |
| γ/°                                         | 77.689(3)                                                     |
| Volume/Å <sup>3</sup>                       | 1097.01(8)                                                    |
| Z                                           | 2                                                             |
| ρ <sub>calc</sub> /cm <sup>3</sup>          | 1.134                                                         |
| μ/mm <sup>-1</sup>                          | 0.066                                                         |
| F(000)                                      | 408.0                                                         |
| Crystal size/mm <sup>3</sup>                | 0.3 × 0.25 × 0.25                                             |
| Radiation                                   | Mo Kα (λ = 0.71073)                                           |
| 2θ range for data collection/               | 4.424 to 64.472                                               |
| Index ranges                                | -10 ≤ h ≤ 13, -16 ≤ k ≤ 16, -17 ≤ l ≤ 17                      |
| Reflections collected                       | 27704                                                         |
| Independent reflections                     | 6963 [R <sub>int</sub> = 0.0333, R <sub>sigma</sub> = 0.0305] |
| Data/restraints/parameters                  | 6963/0/258                                                    |
| Goodness-of-fit on F <sup>2</sup>           | 1.074                                                         |
| Final R indexes [I ≥ 2σ (I)]                | R <sub>1</sub> = 0.0483, wR <sub>2</sub> = 0.1286             |
| Final R indexes [all data]                  | R <sub>1</sub> = 0.0601, wR <sub>2</sub> = 0.1373             |
| Largest diff. peak/hole / e Å <sup>-3</sup> | 0.61/-0.35                                                    |

**X-ray structure of *cis-6ad*** (CCDC: 2492577)

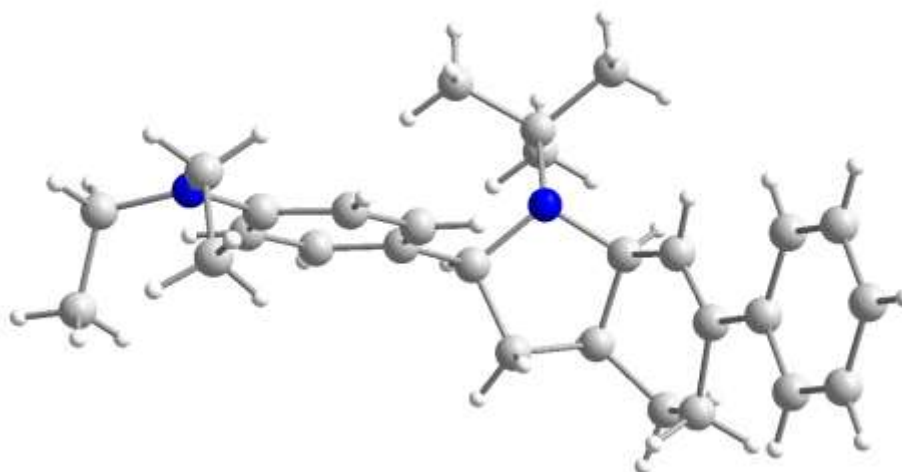

**Fig. S6** X-ray structure of *cis-6ad*

**Table 5** Crystal data and structure refinement for *cis-6ad*.

|                                    |                                                       |
|------------------------------------|-------------------------------------------------------|
| Identification code                | exp_275_auto                                          |
| Empirical formula                  | C <sub>28</sub> H <sub>38</sub> N <sub>2</sub>        |
| Formula weight                     | 402.60                                                |
| Temperature/K                      | 100.03(10)                                            |
| Crystal system                     | triclinic                                             |
| Space group                        | P-1                                                   |
| a/Å                                | 8.1167(2)                                             |
| b/Å                                | 12.0749(3)                                            |
| c/Å                                | 13.3460(3)                                            |
| α/°                                | 65.930(2)                                             |
| β/°                                | 82.836(2)                                             |
| γ/°                                | 81.205(2)                                             |
| Volume/Å <sup>3</sup>              | 1177.42(5)                                            |
| Z                                  | 2                                                     |
| ρ <sub>calc</sub> /cm <sup>3</sup> | 1.136                                                 |
| μ/mm <sup>-1</sup>                 | 0.065                                                 |
| F(000)                             | 440.0                                                 |
| Crystal size/mm <sup>3</sup>       | 0.3 × 0.2 × 0.2                                       |
| Radiation                          | Mo Kα (λ = 0.71073)                                   |
| 2θ range for data collection/      | 5.09 to 64.656                                        |
| Index ranges                       | -9 ≤ h ≤ 12, -17 ≤ k ≤ 18, -18 ≤ l ≤ 19               |
| Reflections collected              | 30627                                                 |
| Independent reflections            | 7499 [R <sub>int</sub> = 0.0327, R <sub>sigma</sub> = |

|                                             |                           |
|---------------------------------------------|---------------------------|
|                                             | 0.0292]                   |
| Data/restraints/parameters                  | 7499/0/276                |
| Goodness-of-fit on F2                       | 1.074                     |
| Final R indexes [ $I \geq 2\sigma(I)$ ]     | R1 = 0.0483, wR2 = 0.1286 |
| Final R indexes [all data]                  | R1 = 0.0601, wR2 = 0.1373 |
| Largest diff. peak/hole / e Å <sup>-3</sup> | 0.61/-0.35                |

## References

1. (a) Manzer, L. E. *J. Am. Chem. Soc.* **1978**, *100*, 8068. (b) Nishiura, M.; Baldamus, J.; Shima, T.; Mori, K.; Hou, Z. *Chem. Eur. J.* **2011**, *17*, 5033. (c) Shima, T.; Nishiura, M.; Hou, Z. *Organometallics* **2011**, *30*, 2513. (d) Li, X.; Nishiura, M.; Mori, K.; Mashiko, T.; Hou, Z. *Chem. Commun.* **2007**, 4137.
2. (a) Cheng, R.; Zhong, K.; Chu, X.; Lan, Y.; Li, C.-J. *ACS Catal.* **2024**, *14*, 17310. (b) Ma, J.-T.; Zhang, T.; Yao, B.-Y.; Xiao, L.-J.; Zhou, Q.-L. *J. Am. Chem. Soc.* **2023**, *145*, 19195. (c) Ma, X.; Malcolmson, S. J. *J. Am. Chem. Soc.* **2023**, *145*, 27680. (d) Braconi, E.; Götzinger, A. C.; Cramer, N. *J. Am. Chem. Soc.* **2020**, *142*, 19819.
3. Cheung, L. L. W.; Yudin, A. K. *Chem. Eur. J.* **2010**, *16*, 4100.
4. Cong, X.; Hao, N.; Mishra, A.; Zhuo, Q.; An, K.; Nishiura, M.; Hou, Z. *J. Am. Chem. Soc.* **2024**, *146*, 10187.
5. (a) Chowdari, N. S.; Barbas, C. F. *Org. Lett.* **2005**, *7*, 867. (b) Süsse, L.; Vogler, M.; Mewald, M.; Kemper, B.; Irran, E.; Oestreich, M. *Angew. Chem. Int. Ed.* **2018**, *57*, 11441.
6. Fan, X.; Lv, H.; Guan, Y.-H.; Zhu, H.-B.; Cui, X.-M.; Guo, K. *Chem. Commun.* **2014**, *50*, 4119.
7. Liu, L.; Guo, D.; Wang, J. *Org. Lett.* **2020**, *22*, 7025.
8. Guan, B.-T.; Wang, B.; Nishiura, M.; Hou, Z. *Angew. Chem., Int. Ed.* **2013**, *52*, 4418.
9. APEX3 v2016.1-0, Bruker AXS Inc., Madison, 2016.
10. M. C. Burla, R. Caliendo, B. Carrozzini, G. L. Cascarano, C. Cuocci, C. Giacovazzo, M. Mallamo, A. Mazzone, G. Polidori, SIR-2014, version 14.07.
11. G. M. Sheldrick, SHELXL 2018/1, University of Göttingen, Germany, 2018.
12. L. J. Farrugia, *J. Appl. Cryst.* **2012**, *45*, 849.

## 10. Copies of $^1\text{H}$ , and $^{13}\text{C}$ NMR Spectra

### $^1\text{H}$ NMR spectrum of *trans*-3aa (600 MHz, $\text{CDCl}_3$ )

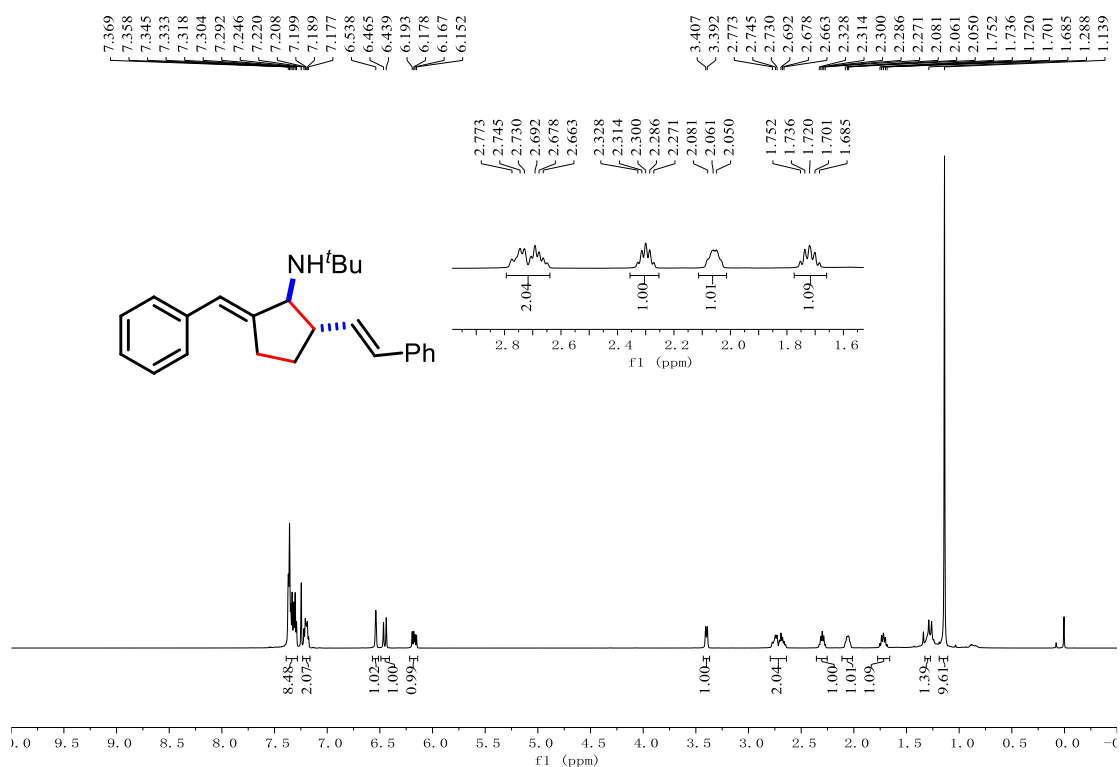

### $^{13}\text{C}$ NMR spectrum of *trans*-3aa (101 MHz, $\text{CDCl}_3$ )

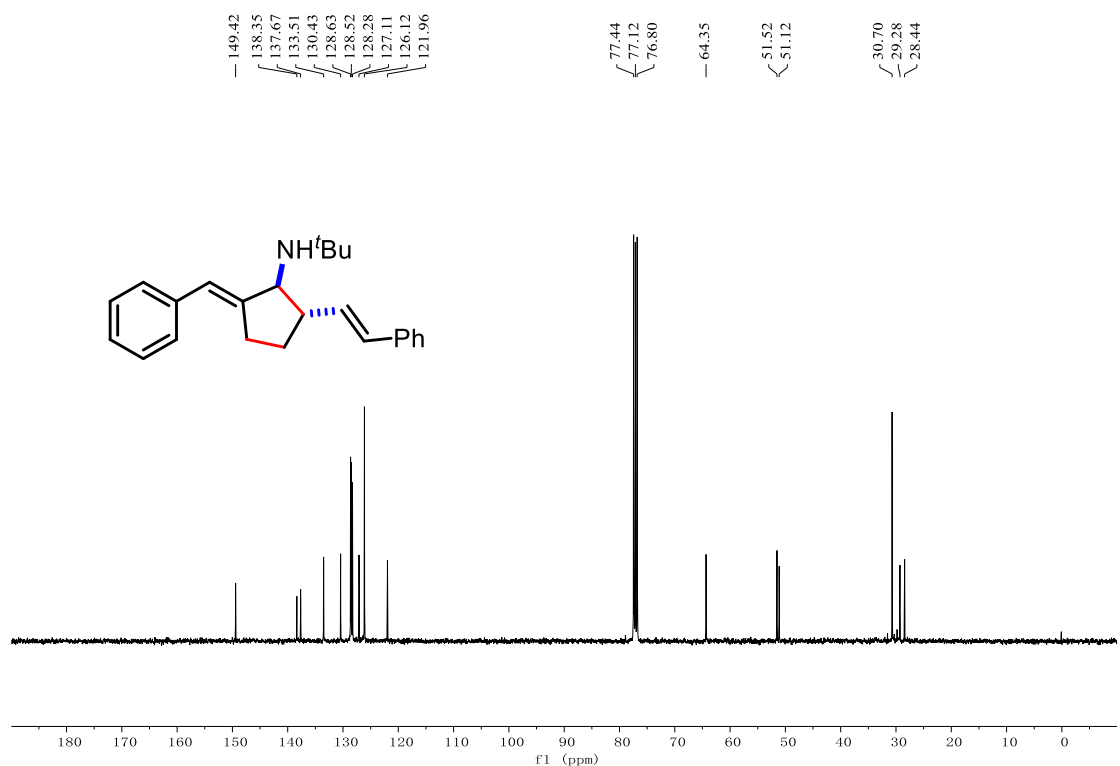

**<sup>1</sup>H NMR spectrum of *trans*-3ba (600 MHz, CDCl<sub>3</sub>)**

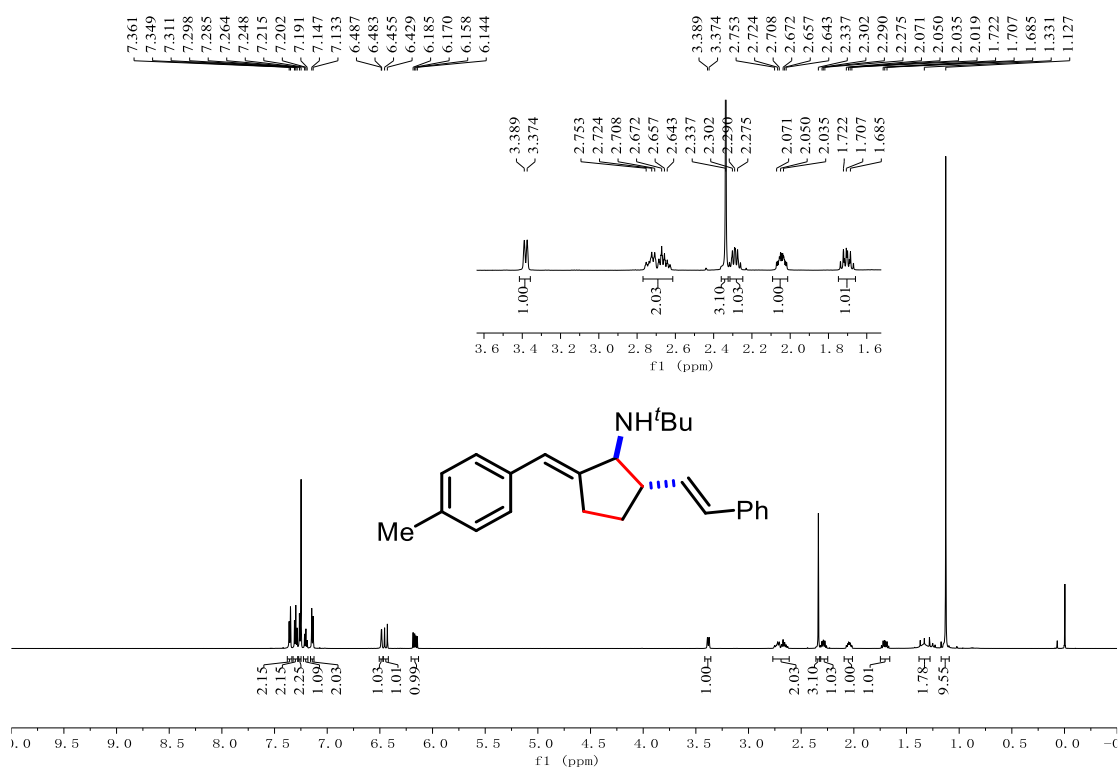

**<sup>13</sup>C NMR spectrum of *trans*-3ba (101 MHz, CDCl<sub>3</sub>)**

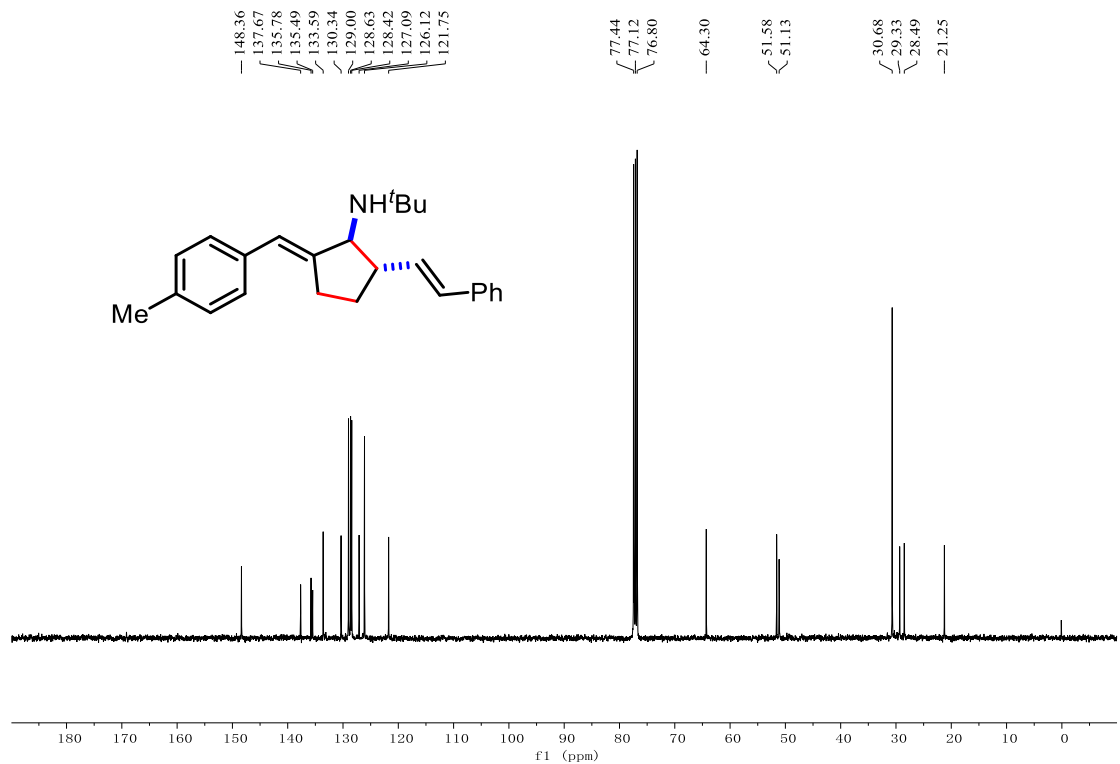

**<sup>1</sup>H NMR spectrum of *trans*-3ca (600 MHz, CDCl<sub>3</sub>)**

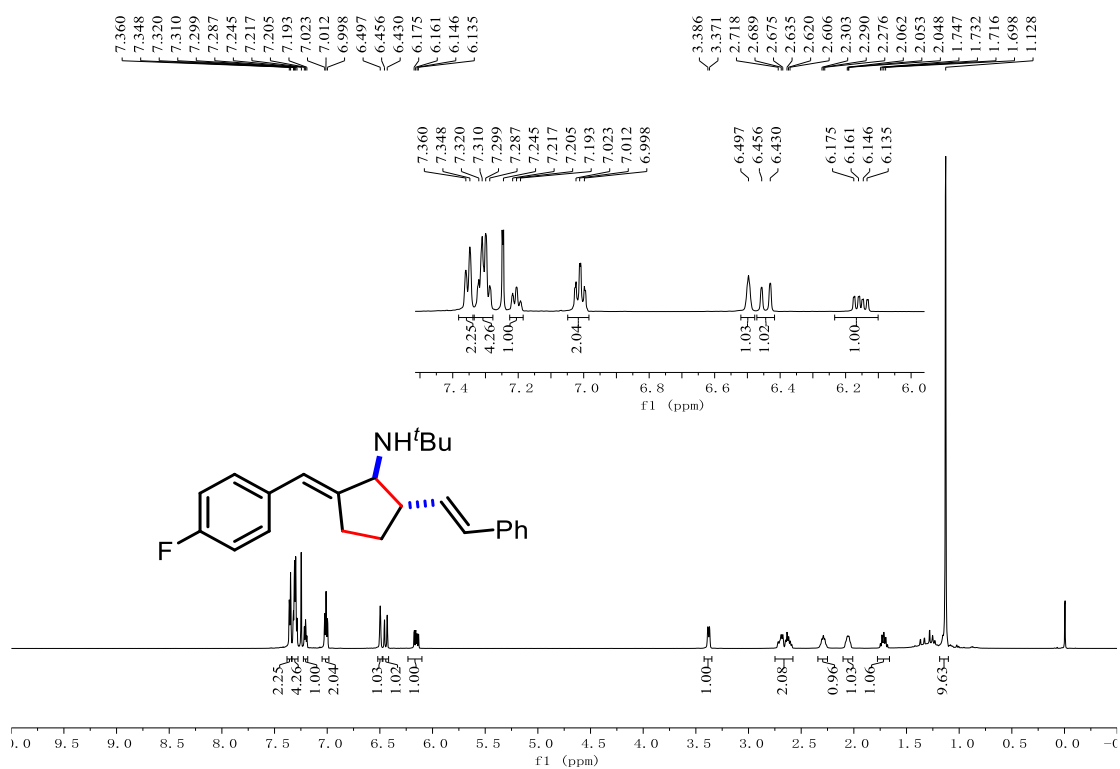

**<sup>13</sup>C NMR spectrum of *trans*-3ca (101 MHz, CDCl<sub>3</sub>)**

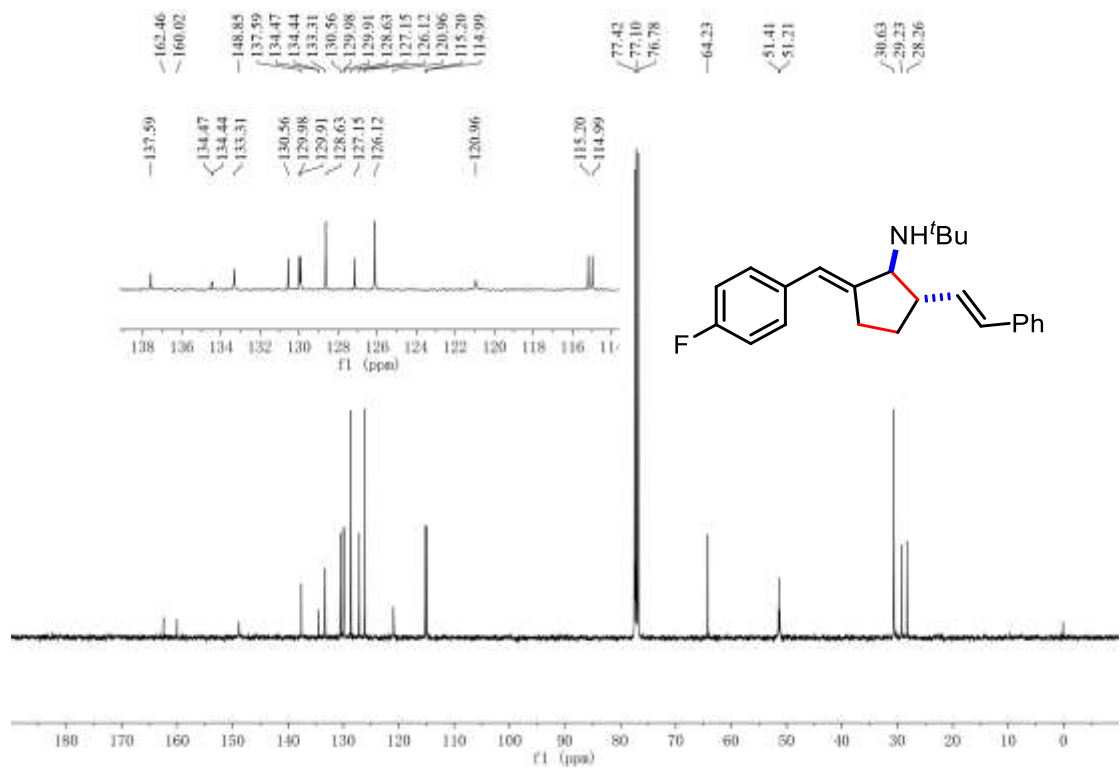

### $^1\text{H}$ NMR spectrum of *trans*-3da (600 MHz, $\text{CDCl}_3$ )

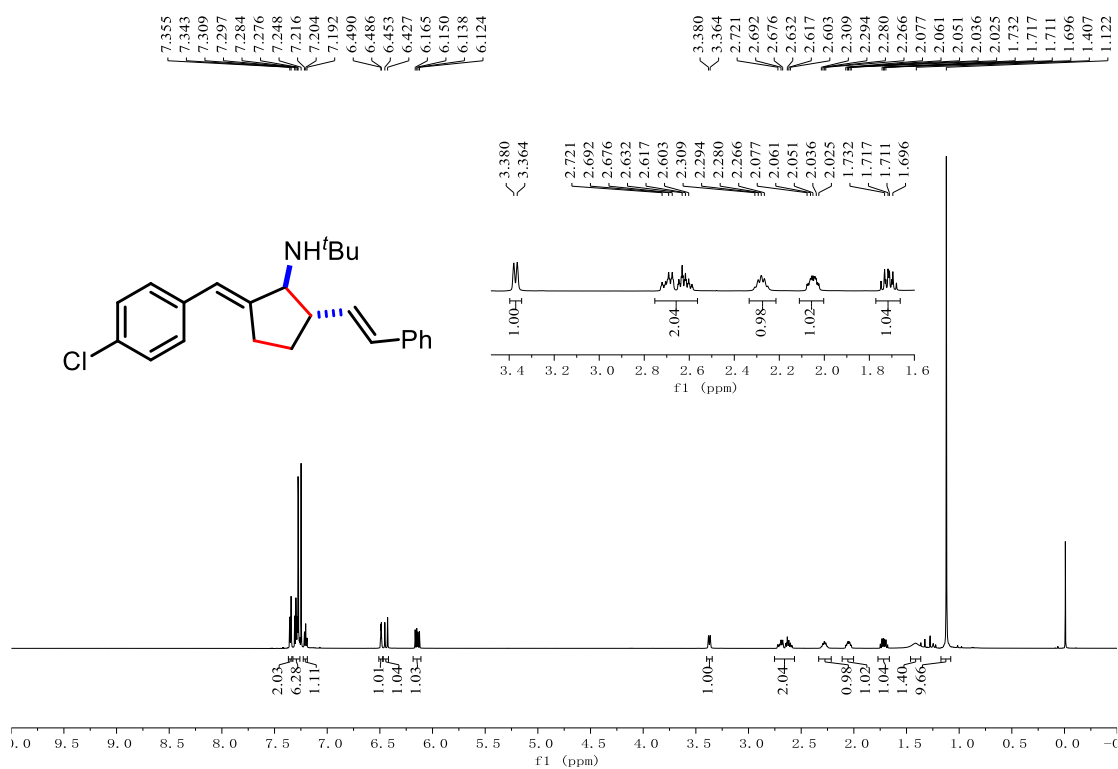

### $^{13}\text{C}$ NMR spectrum of *trans*-3da (101 MHz, $\text{CDCl}_3$ )

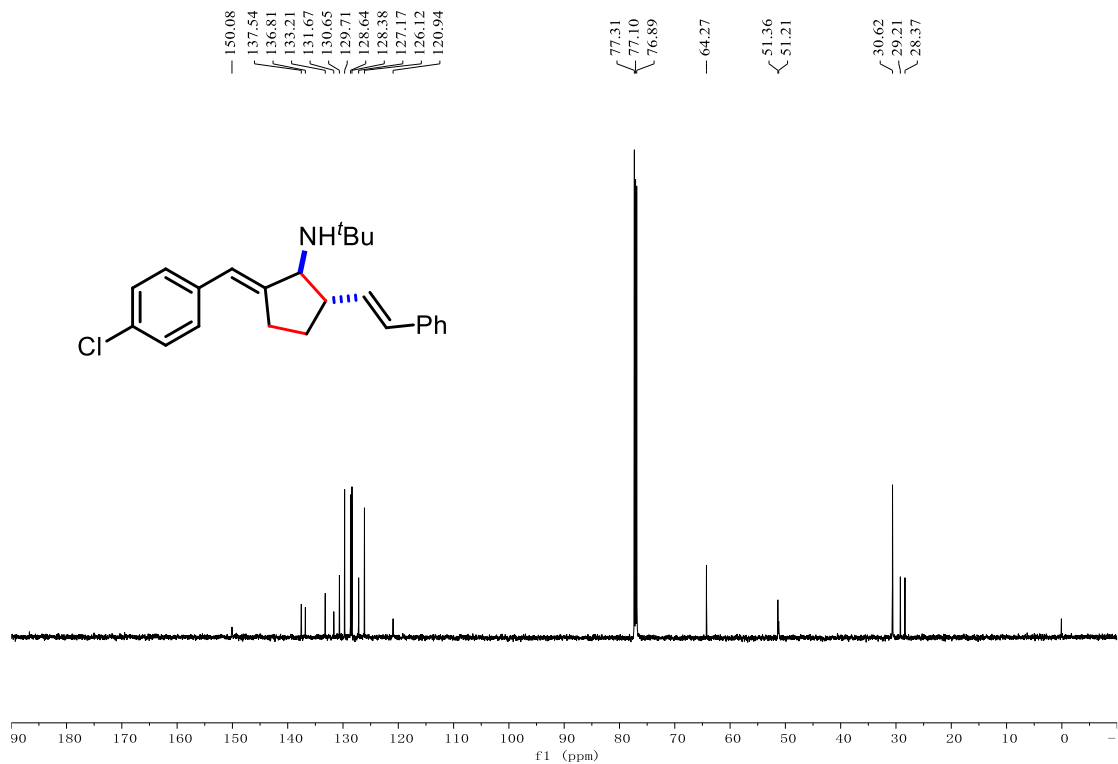

**$^1\text{H}$  NMR spectrum of *trans*-3ea (600 MHz,  $\text{CDCl}_3$ )**

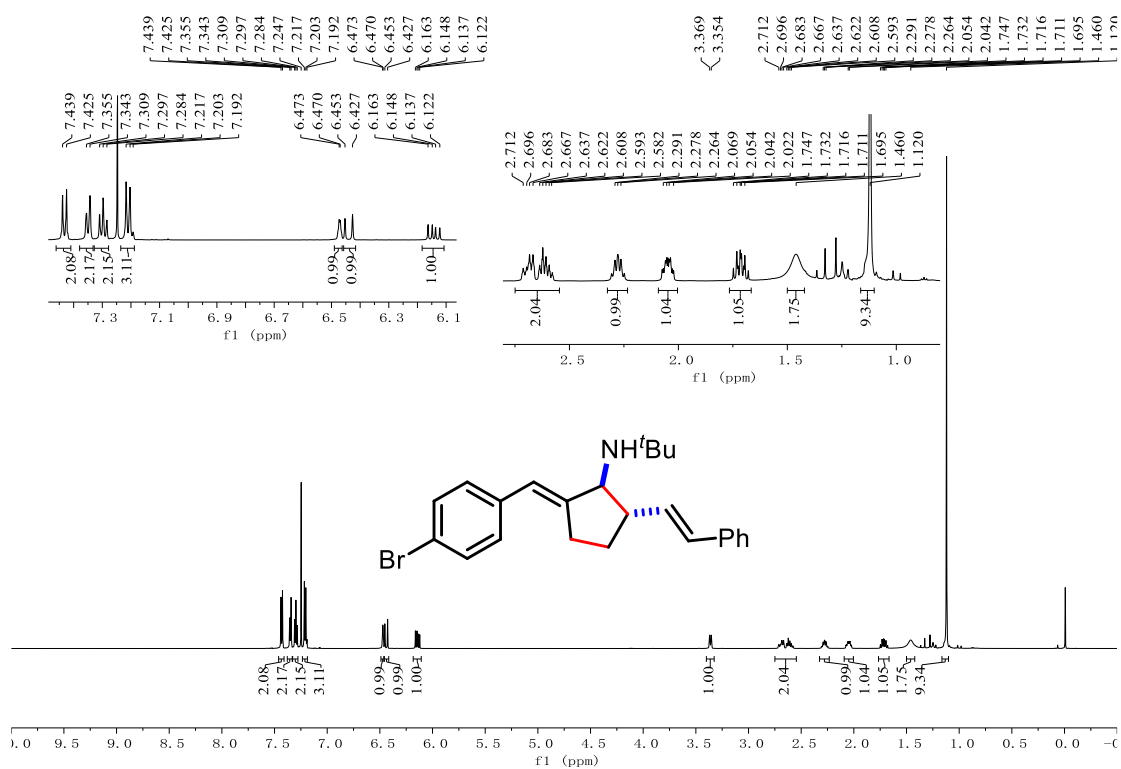

**$^{13}\text{C}$  NMR spectrum of *trans*-3ea (101 MHz,  $\text{CDCl}_3$ )**

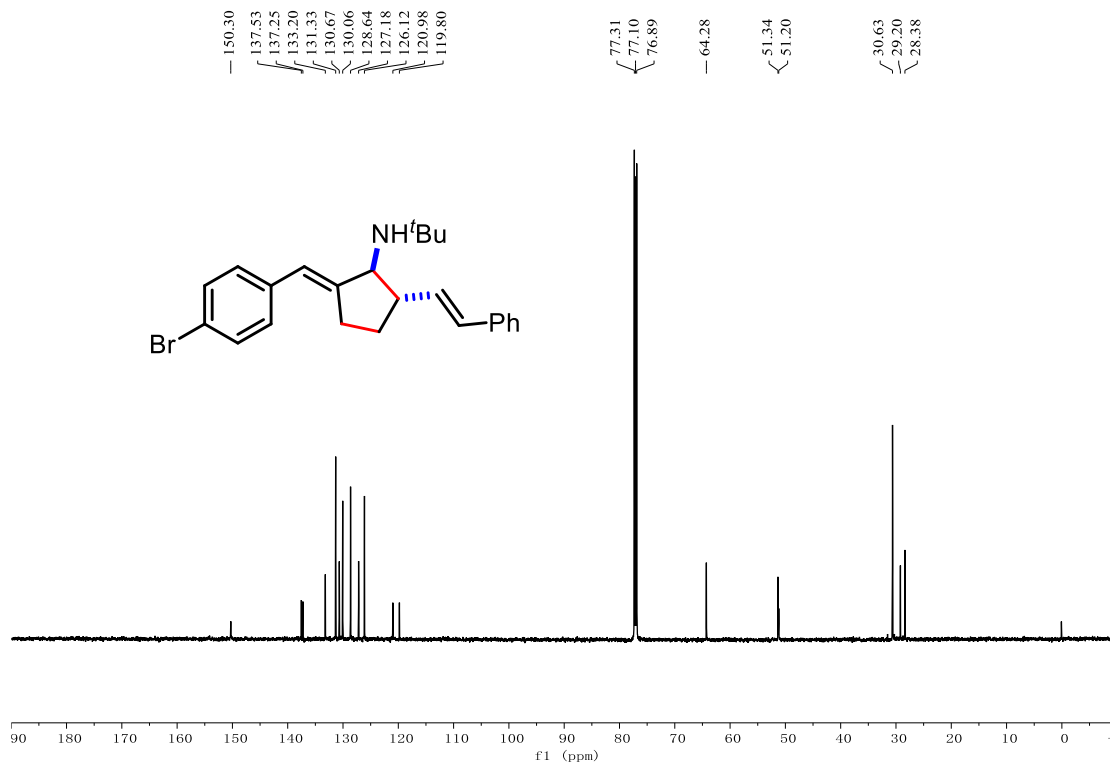



**<sup>1</sup>H NMR spectrum of *trans*-3ga (600 MHz, CDCl<sub>3</sub>)**

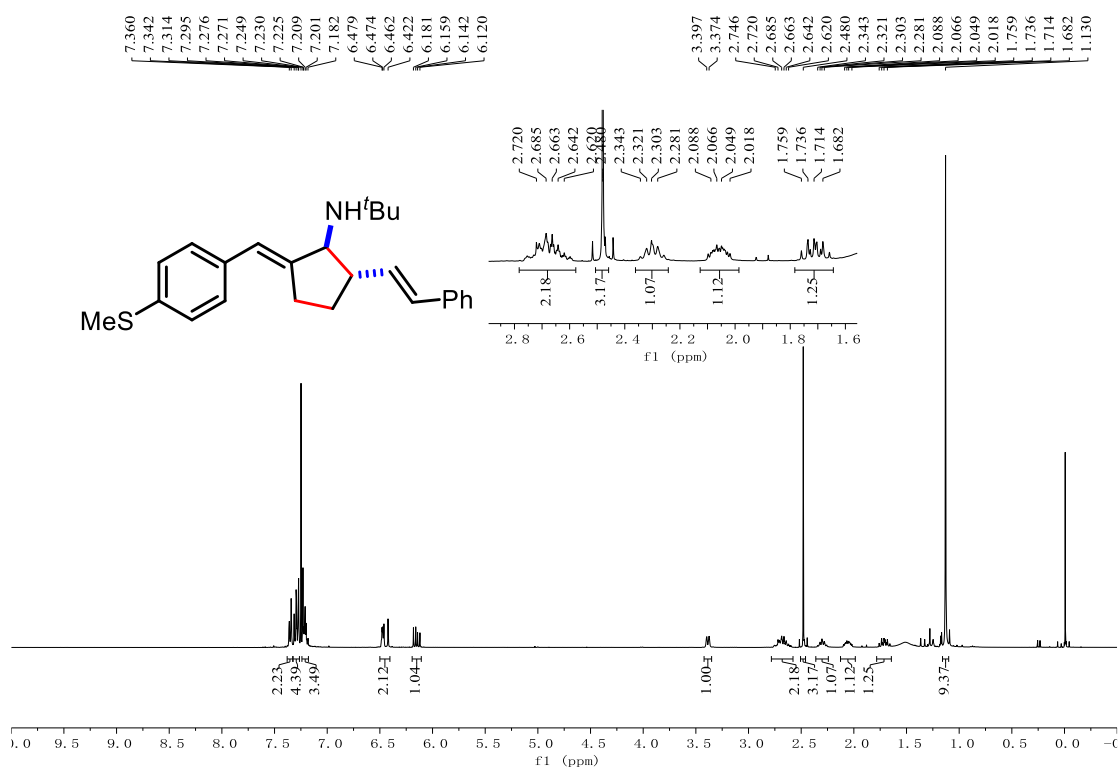

**<sup>13</sup>C NMR spectrum of *trans*-3ga (101 MHz, CDCl<sub>3</sub>)**

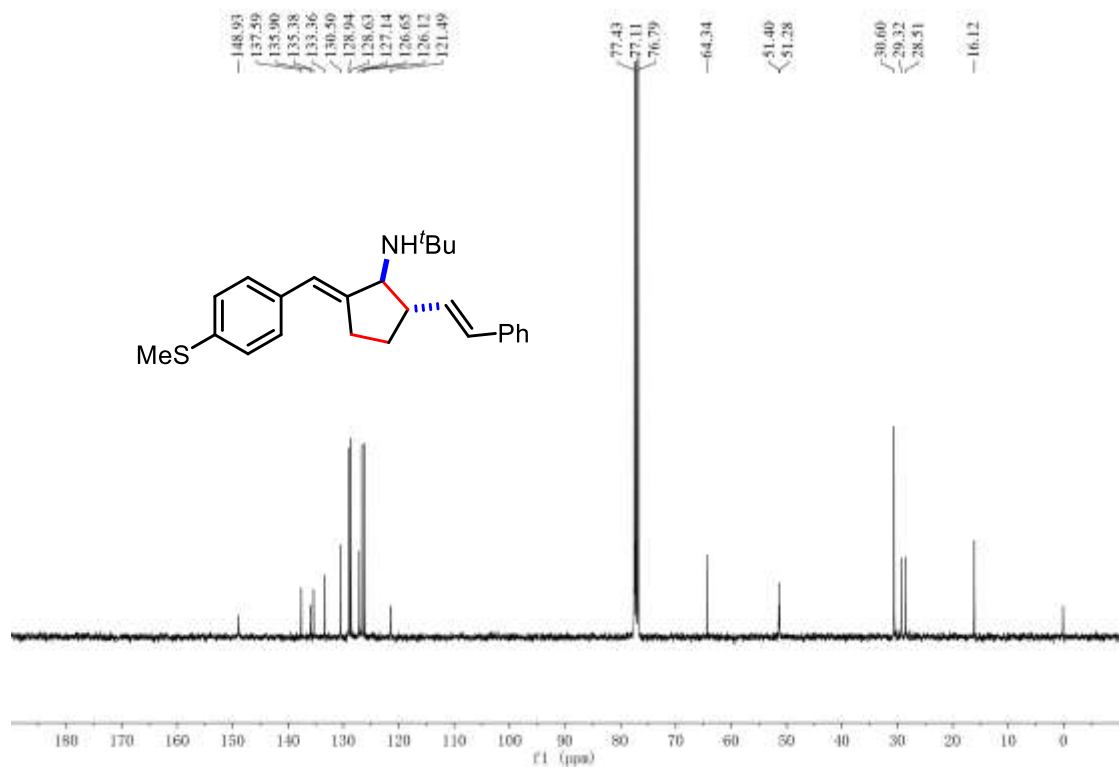

**$^1\text{H}$  NMR spectrum of *trans*-3ha (600 MHz,  $\text{CDCl}_3$ )**

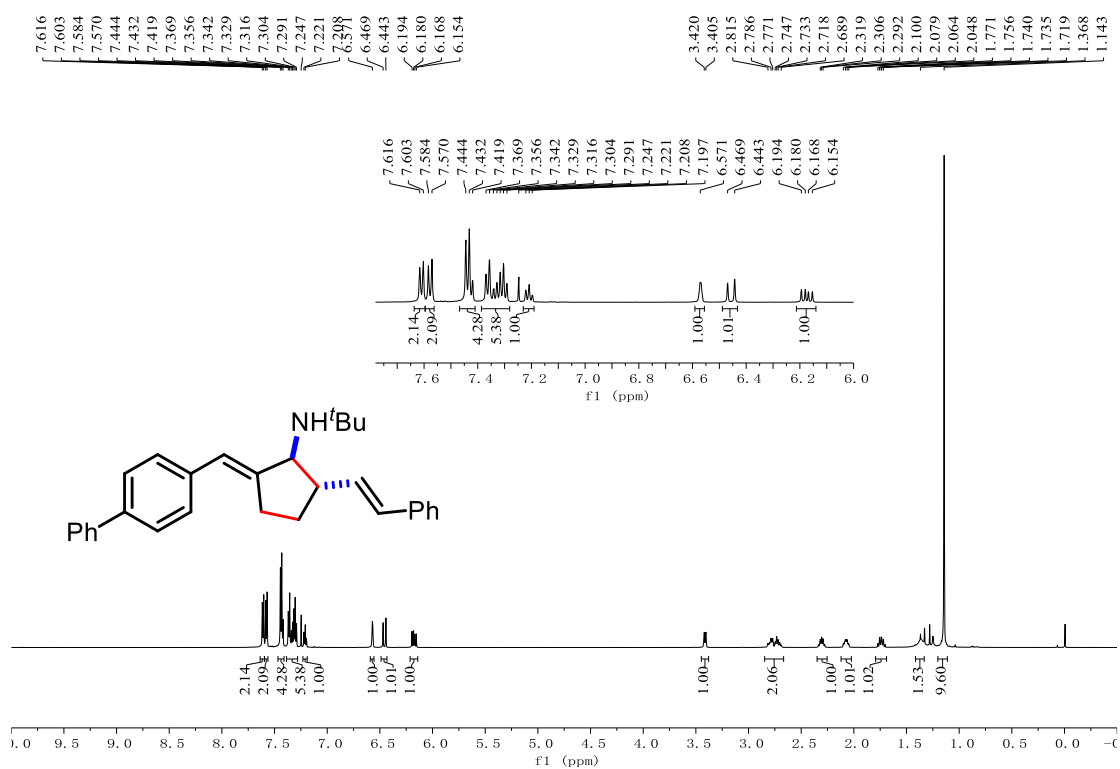

**$^{13}\text{C}$  NMR spectrum of *trans*-3ha (101 MHz,  $\text{CDCl}_3$ )**

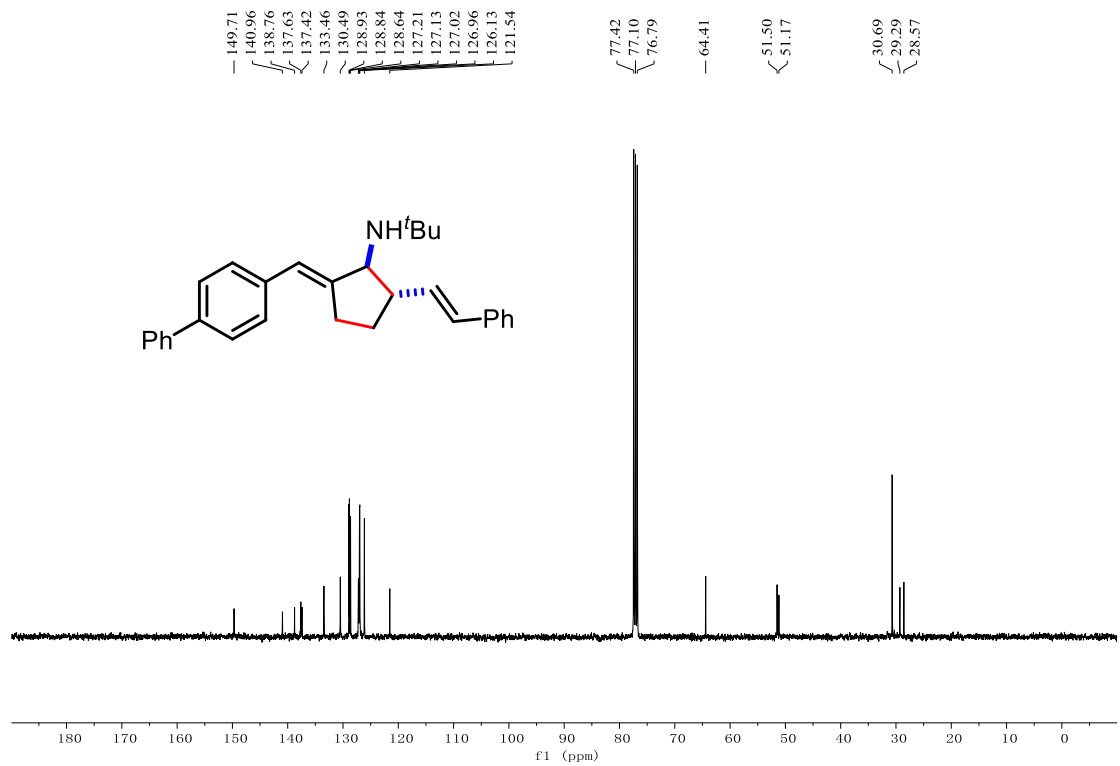

### $^1\text{H}$ NMR spectrum of *trans*-3ia (600 MHz, $\text{CDCl}_3$ )

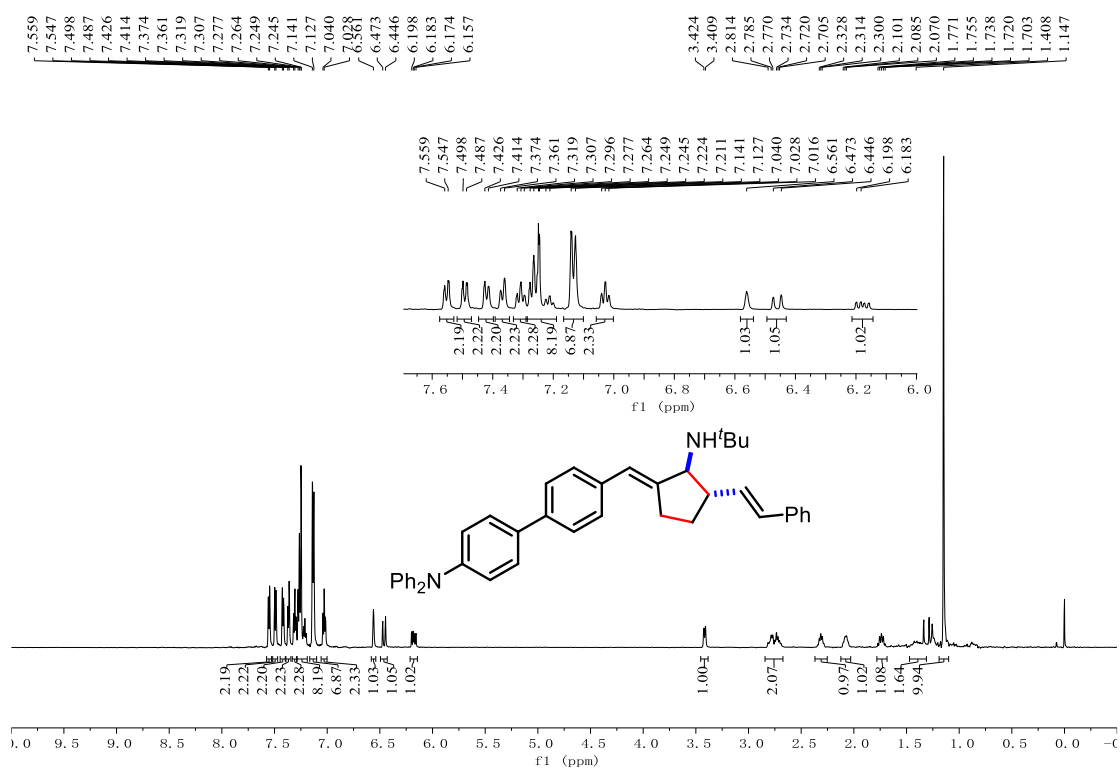

### $^{13}\text{C}$ NMR spectrum of *trans*-3ia (101 MHz, $\text{CDCl}_3$ )

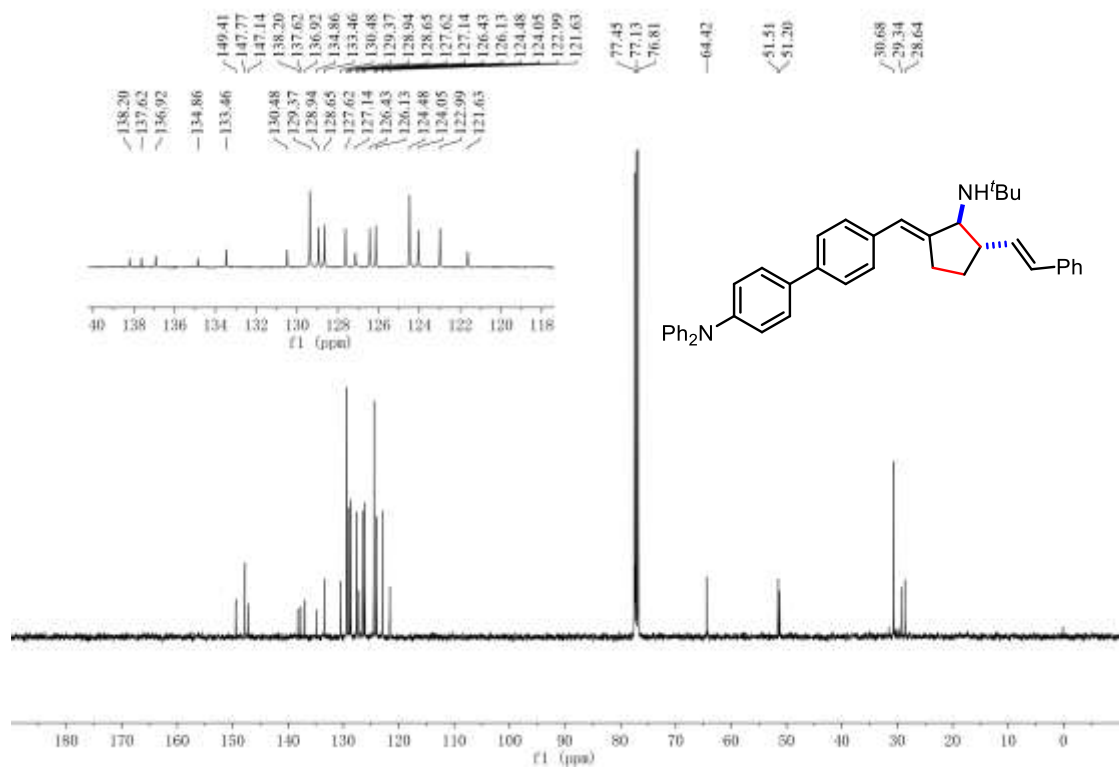

**<sup>1</sup>H NMR spectrum of *trans*-3ja (600 MHz, CDCl<sub>3</sub>)**

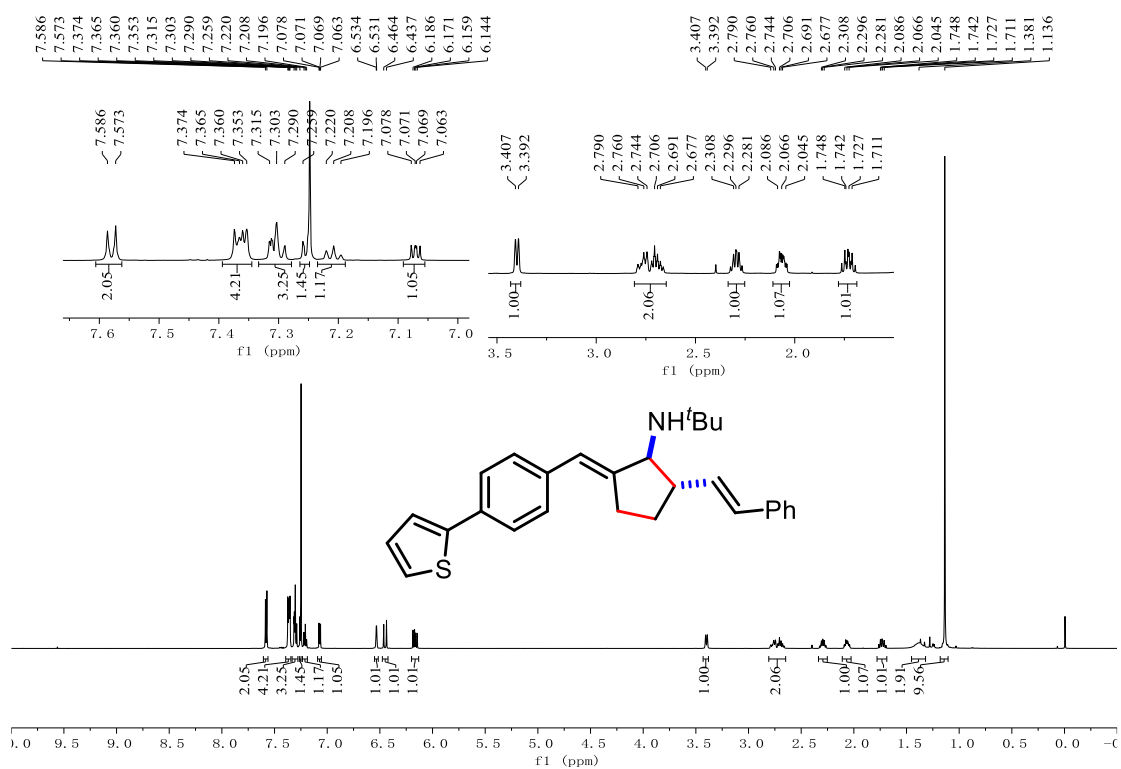

**<sup>13</sup>C NMR spectrum of *trans*-3ja (101 MHz, CDCl<sub>3</sub>)**

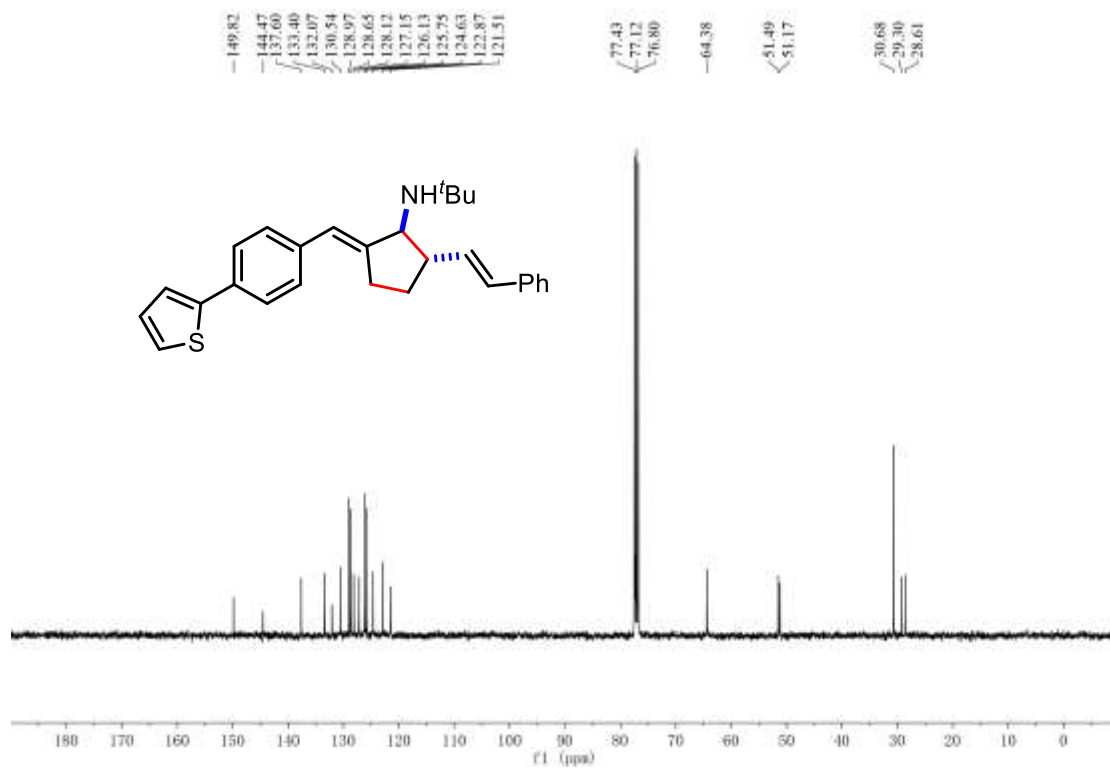

**<sup>1</sup>H NMR spectrum of *trans*-3ka (600 MHz, CDCl<sub>3</sub>)**

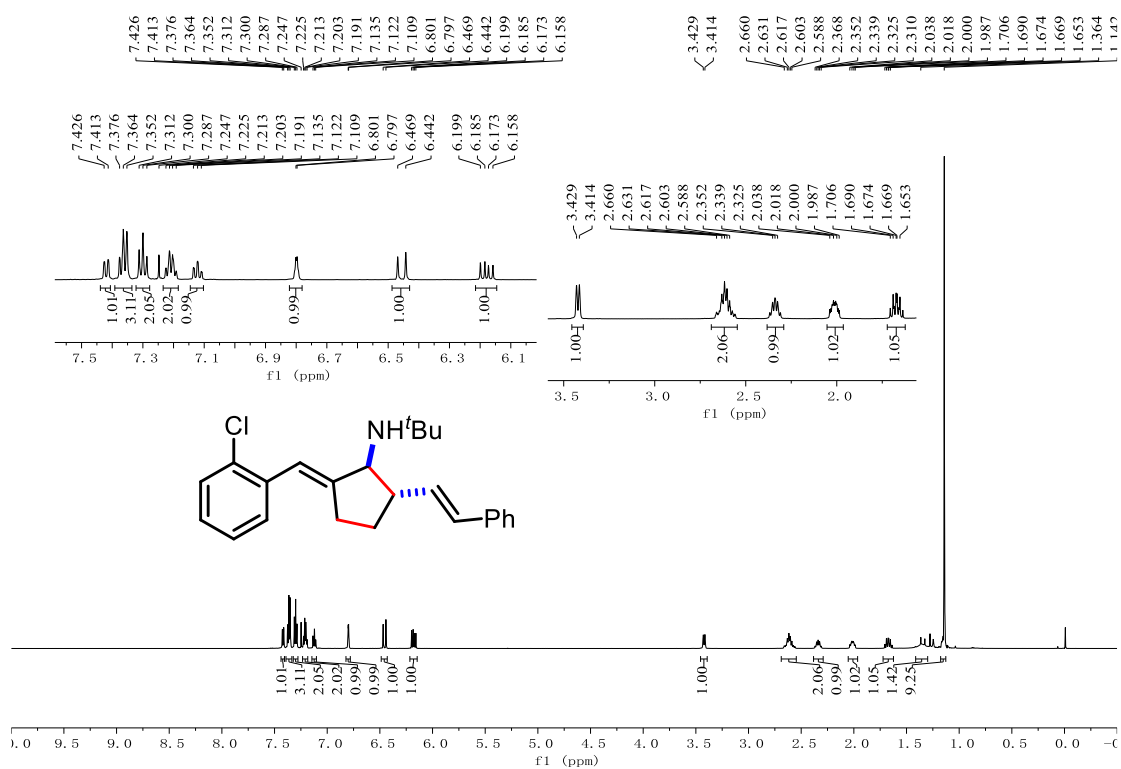

**<sup>13</sup>C NMR spectrum of *trans*-3ka (101 MHz, CDCl<sub>3</sub>)**

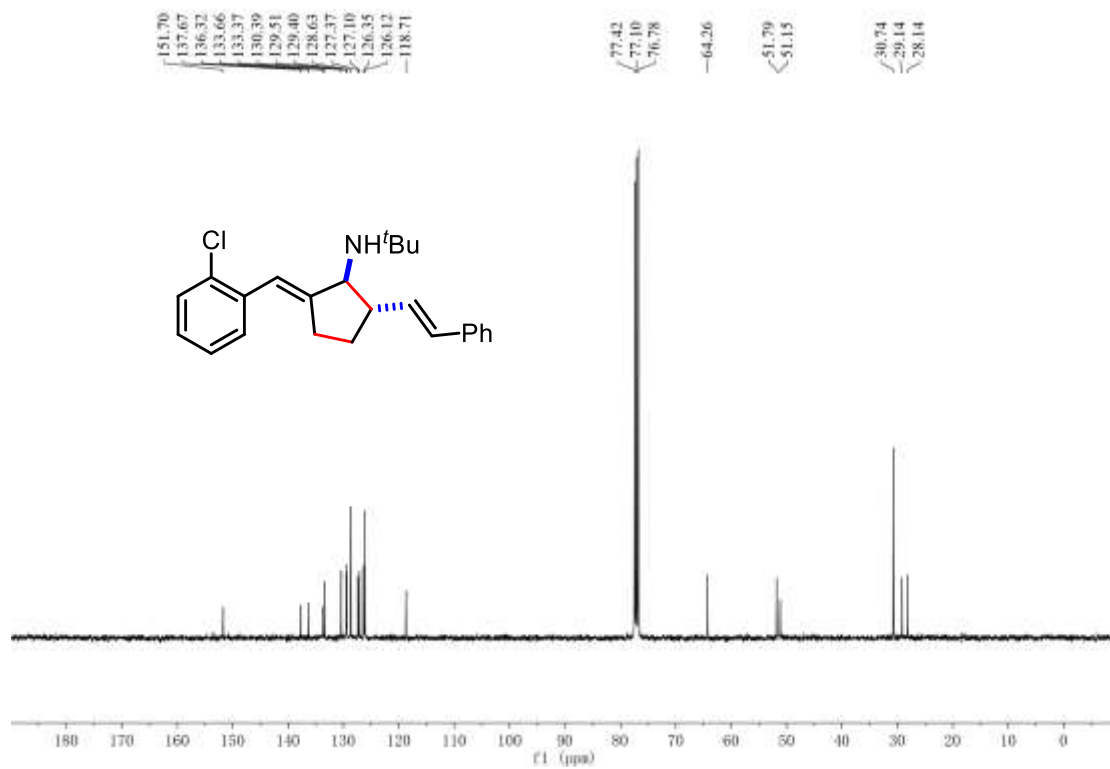

**<sup>1</sup>H NMR spectrum of *trans*-3la (600 MHz, CDCl<sub>3</sub>)**

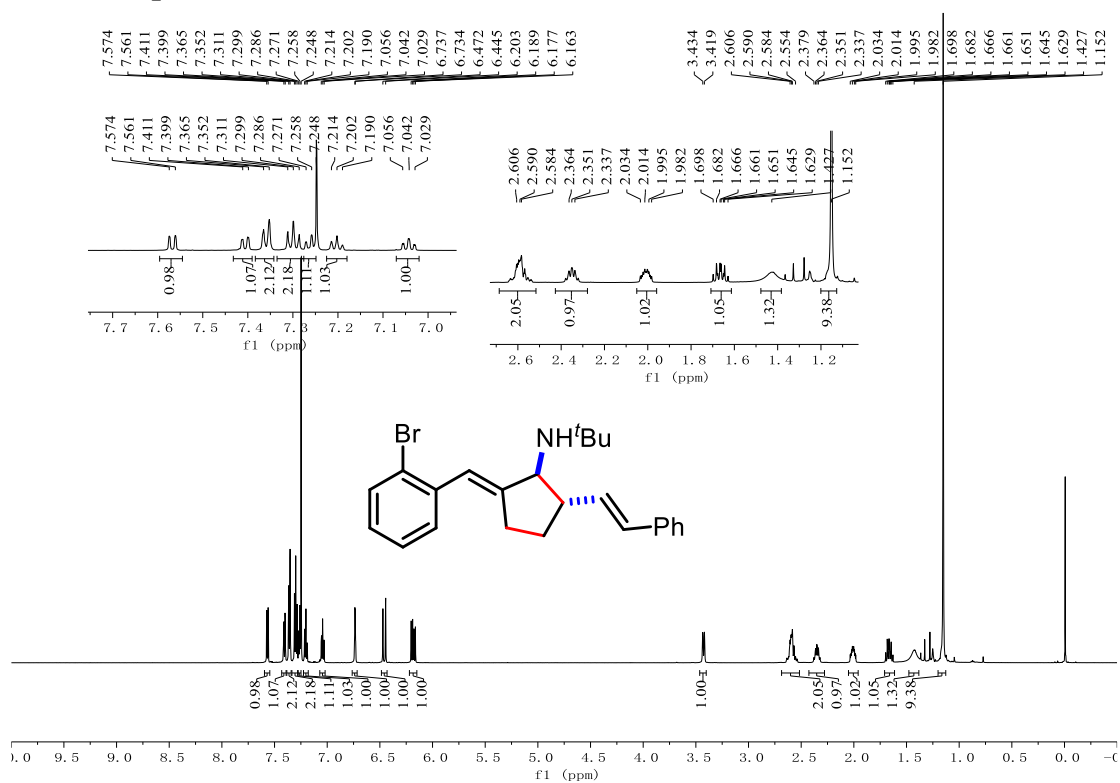

**<sup>13</sup>C NMR spectrum of *trans*-3la (101 MHz, CDCl<sub>3</sub>)**

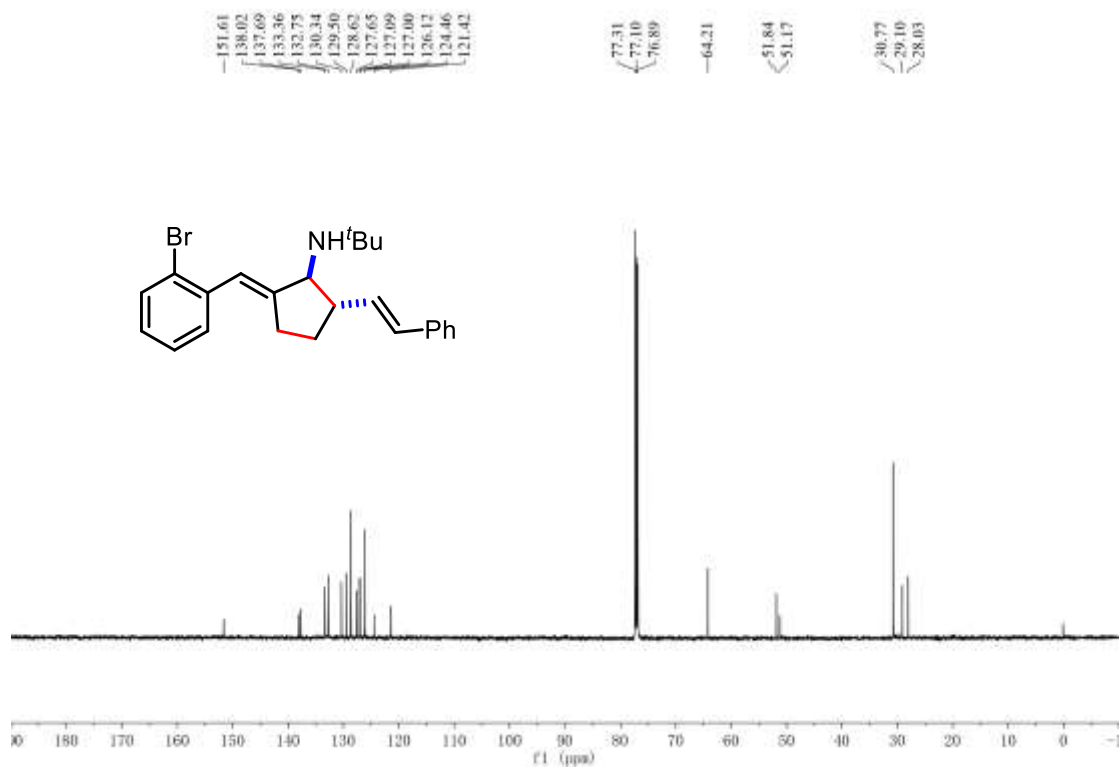

<sup>1</sup>H NMR spectrum of *trans*-3ma (600 MHz, CDCl<sub>3</sub>)

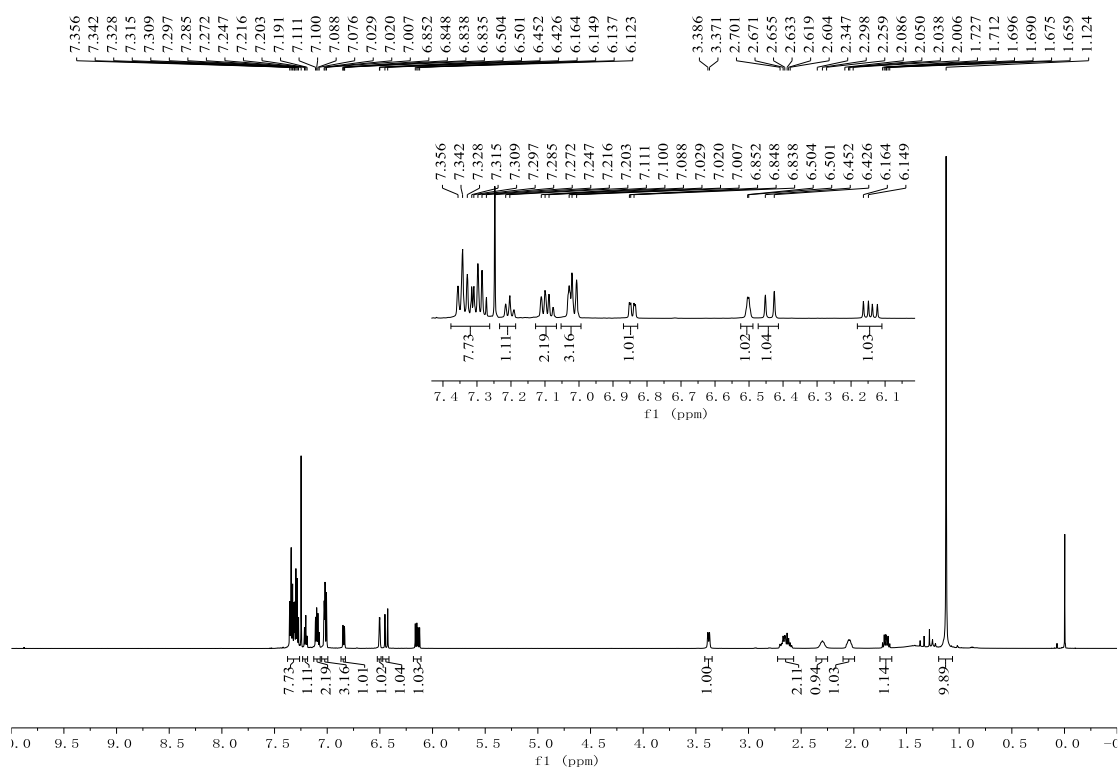

<sup>13</sup>C NMR spectrum of *trans*-3ma (101 MHz, CDCl<sub>3</sub>)

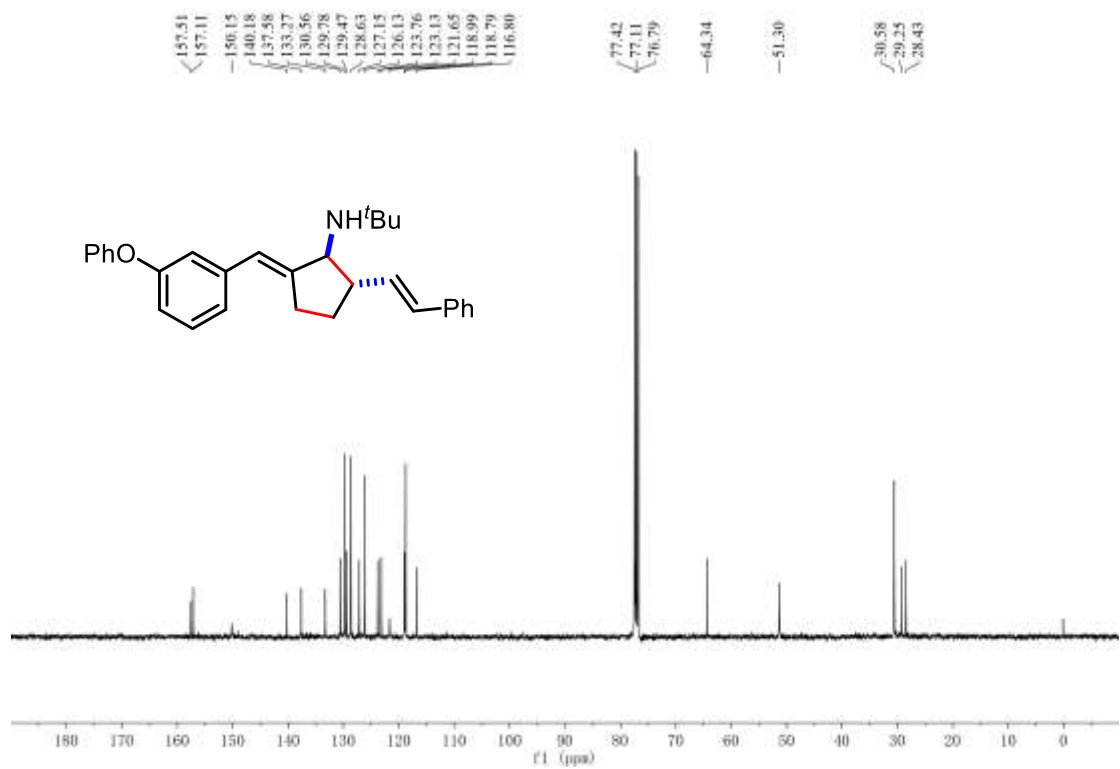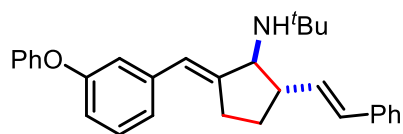

**<sup>1</sup>H NMR spectrum of *trans*-3na (600 MHz, CDCl<sub>3</sub>)**

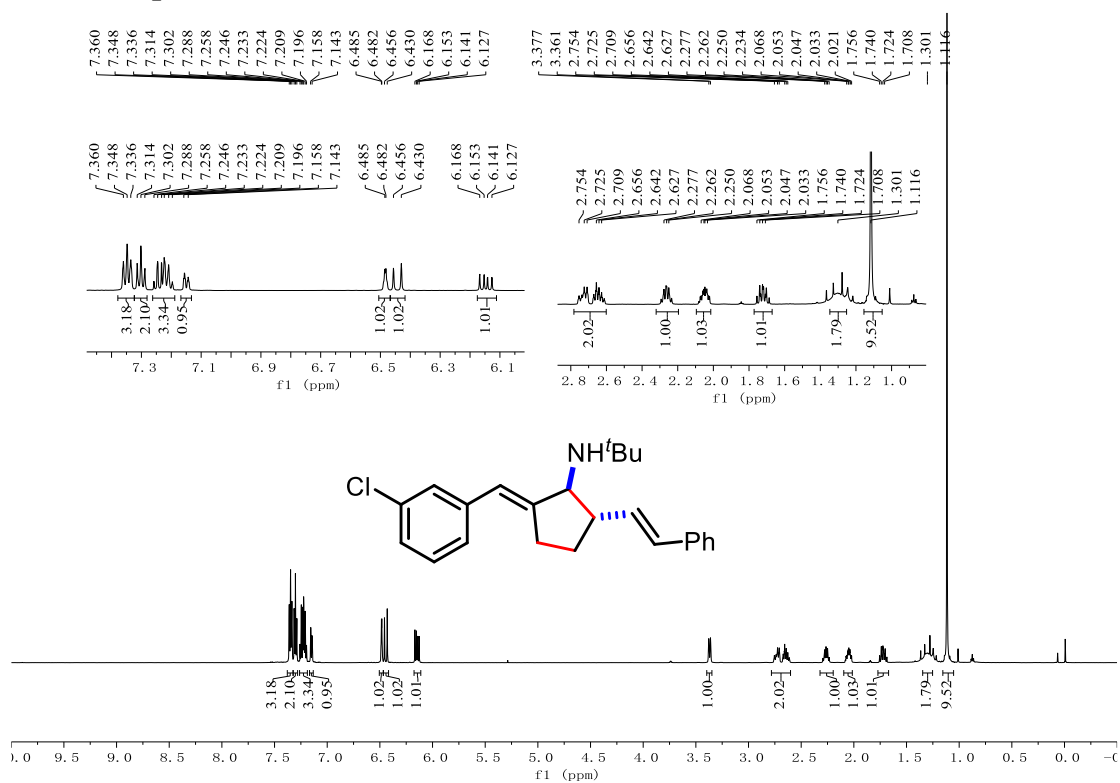

**<sup>13</sup>C NMR spectrum of *trans*-3na (101 MHz, CDCl<sub>3</sub>)**

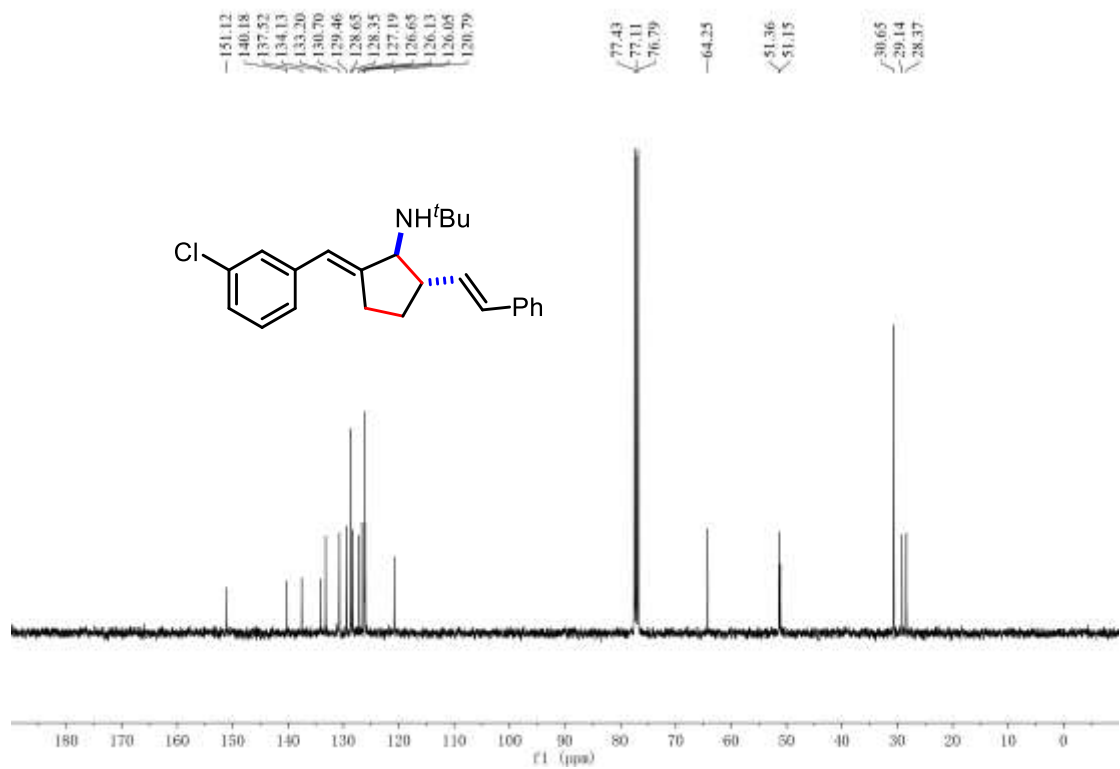

**<sup>1</sup>H NMR spectrum of *trans*-3oa (600 MHz, CDCl<sub>3</sub>)**

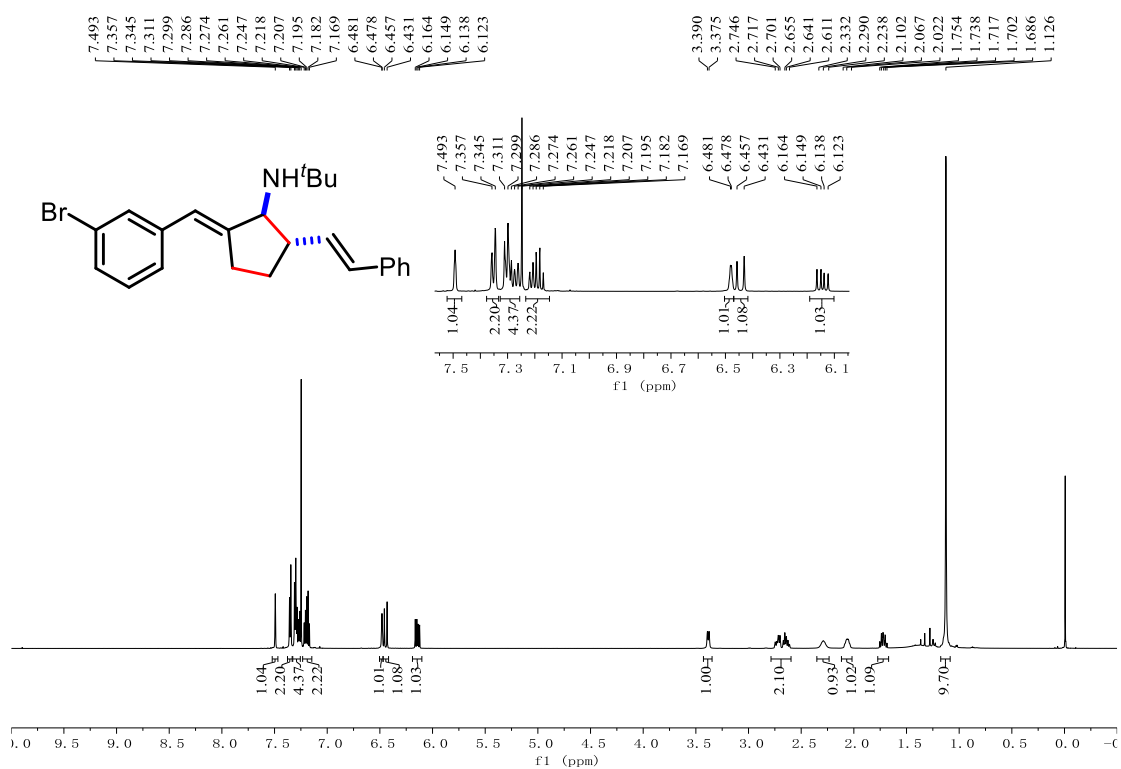

**<sup>13</sup>C NMR spectrum of *trans*-3oa (101 MHz, CDCl<sub>3</sub>)**

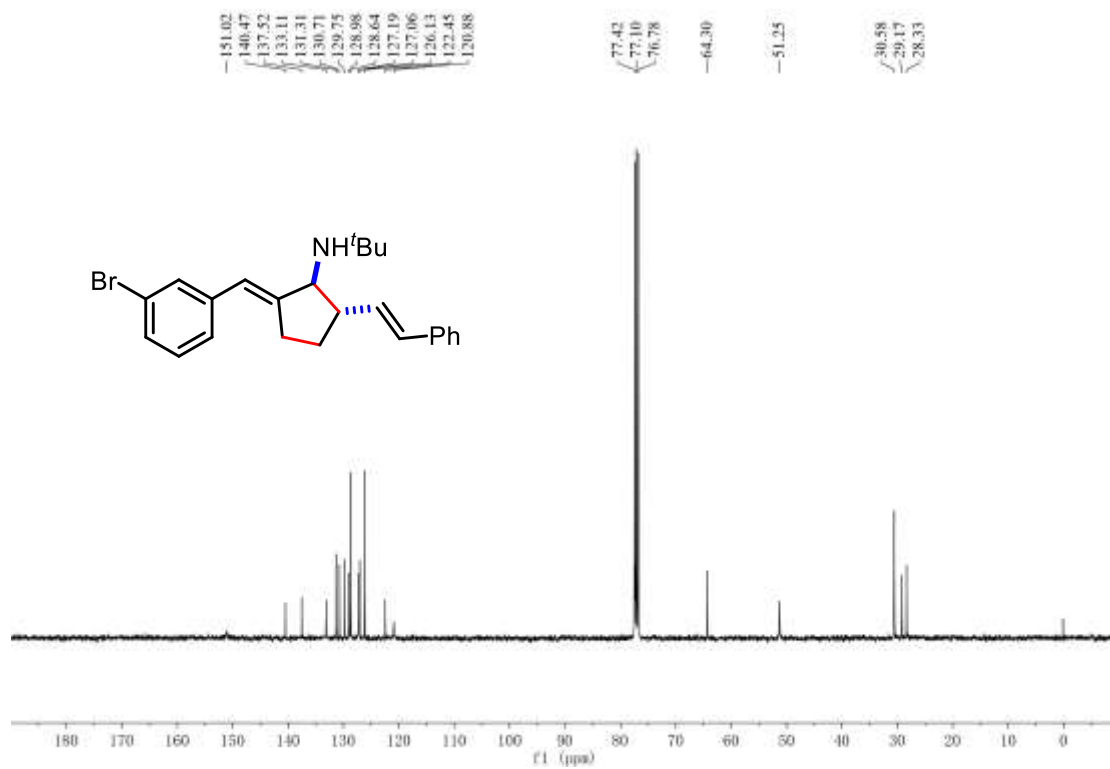

### $^1\text{H}$ NMR spectrum of *trans*-3pa (600 MHz, $\text{CDCl}_3$ )

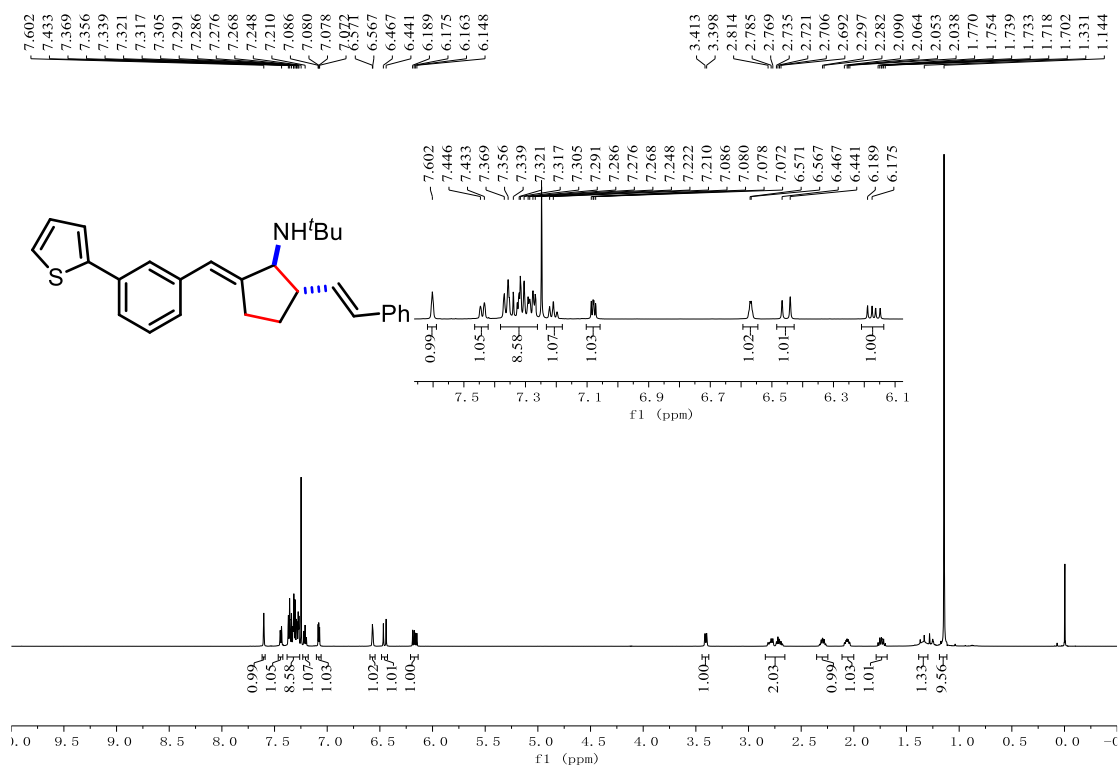

### $^{13}\text{C}$ NMR spectrum of *trans*-3pa (101 MHz, $\text{CDCl}_3$ )

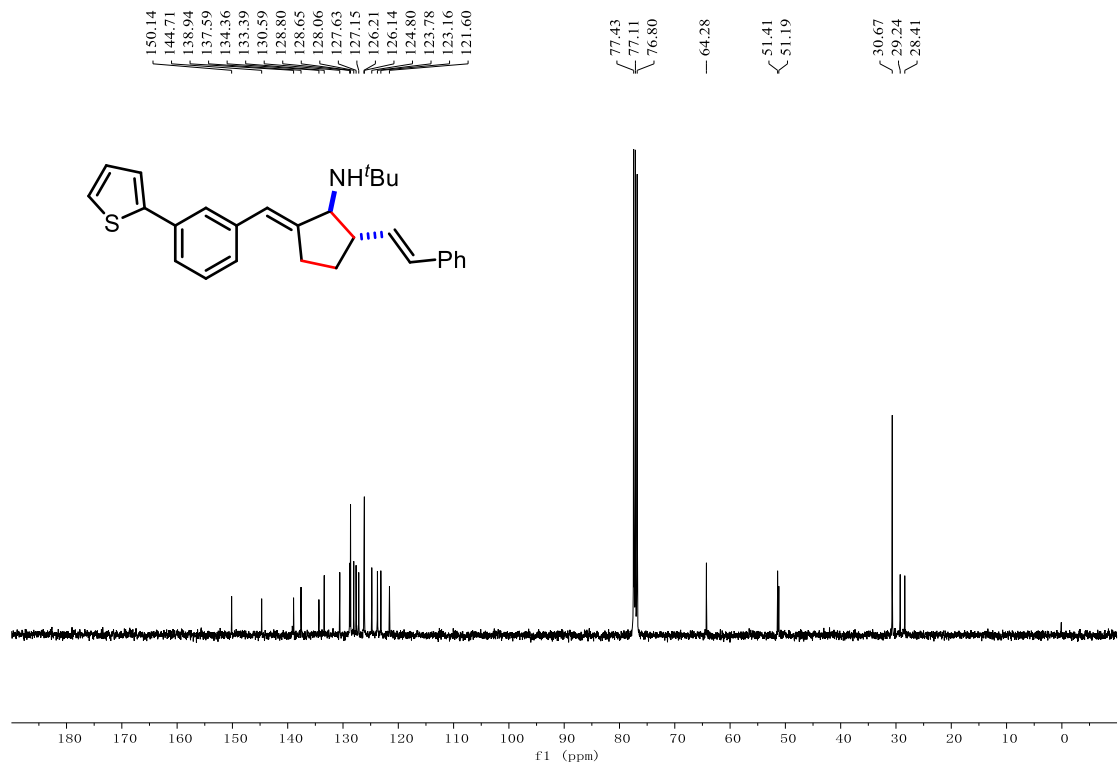

### $^1\text{H}$ NMR spectrum of *trans*-3qa (400 MHz, $\text{CDCl}_3$ )

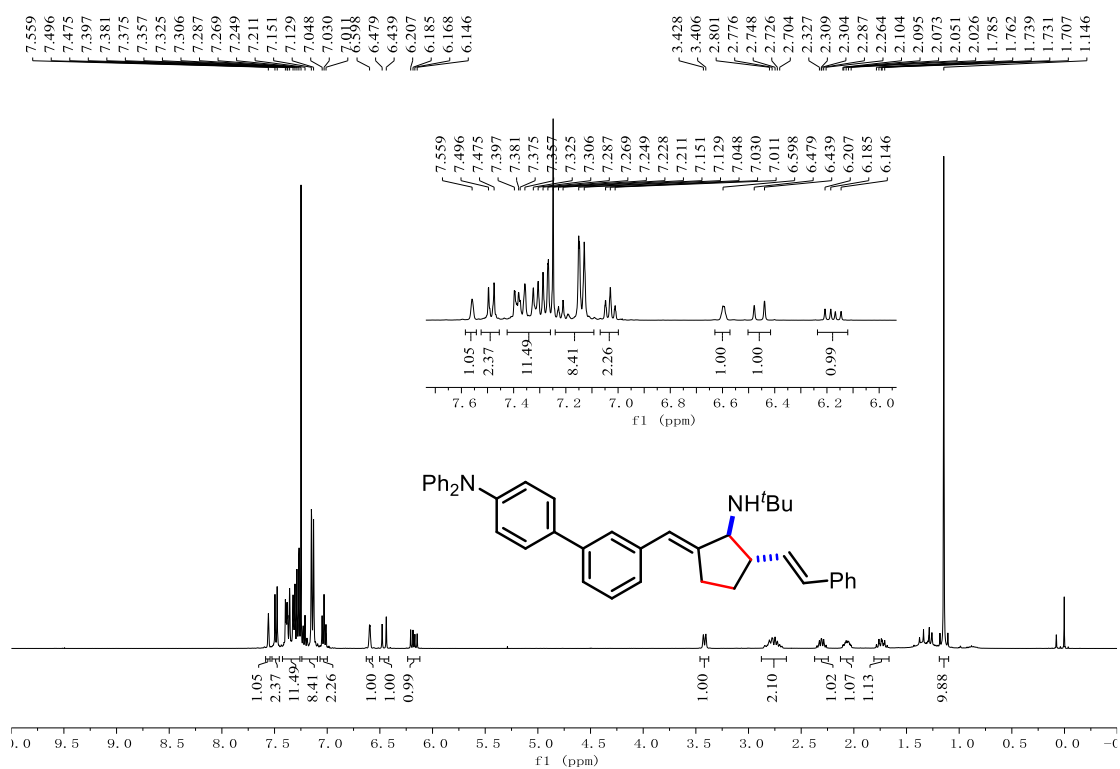

### $^{13}\text{C}$ NMR spectrum of *trans*-3qa (101 MHz, $\text{CDCl}_3$ )

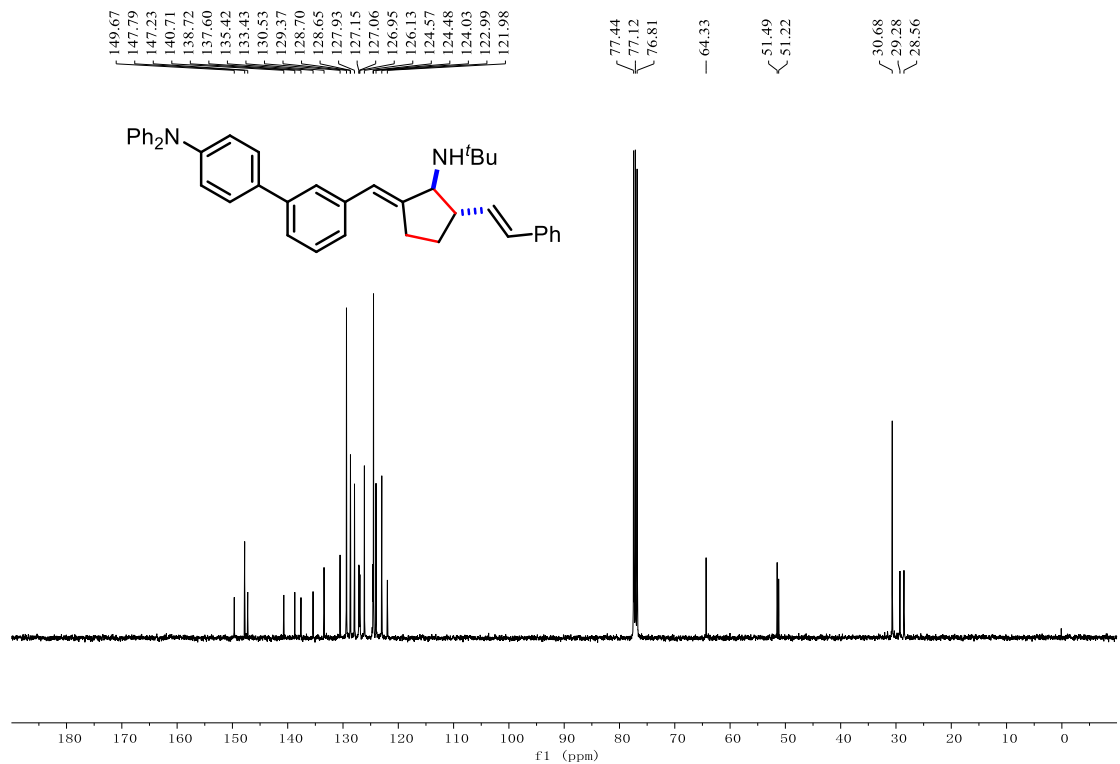

**$^1\text{H}$  NMR spectrum of *trans*-3ra (600 MHz,  $\text{CDCl}_3$ )**

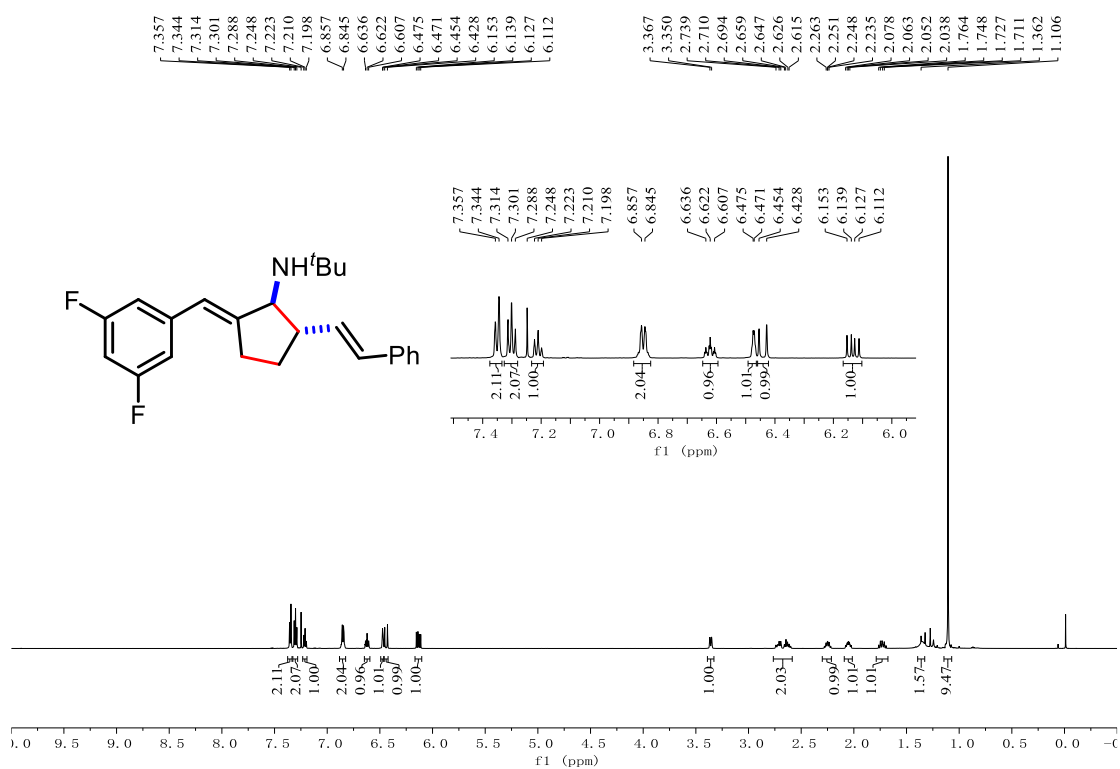

**$^{13}\text{C}$  NMR spectrum of *trans*-3ra (101 MHz,  $\text{CDCl}_3$ )**

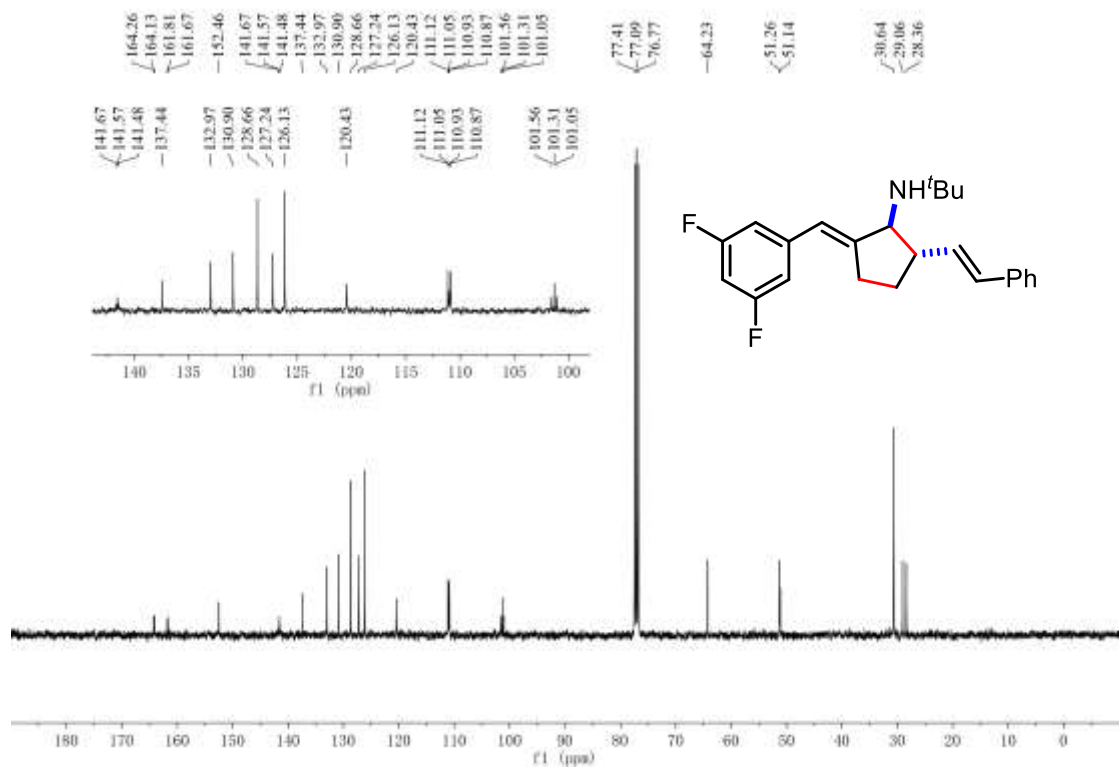

**<sup>1</sup>H NMR spectrum of *trans*-3sa (400 MHz, CDCl<sub>3</sub>)**

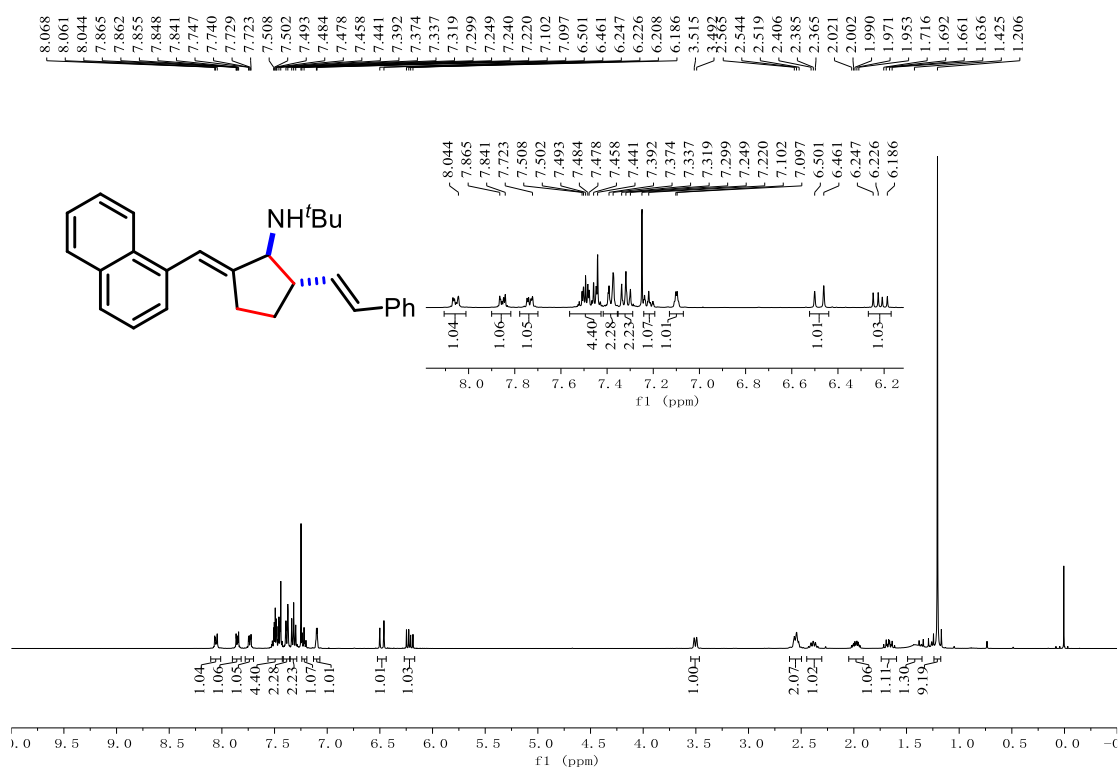

**<sup>13</sup>C NMR spectrum of *trans*-3sa (101 MHz, CDCl<sub>3</sub>)**

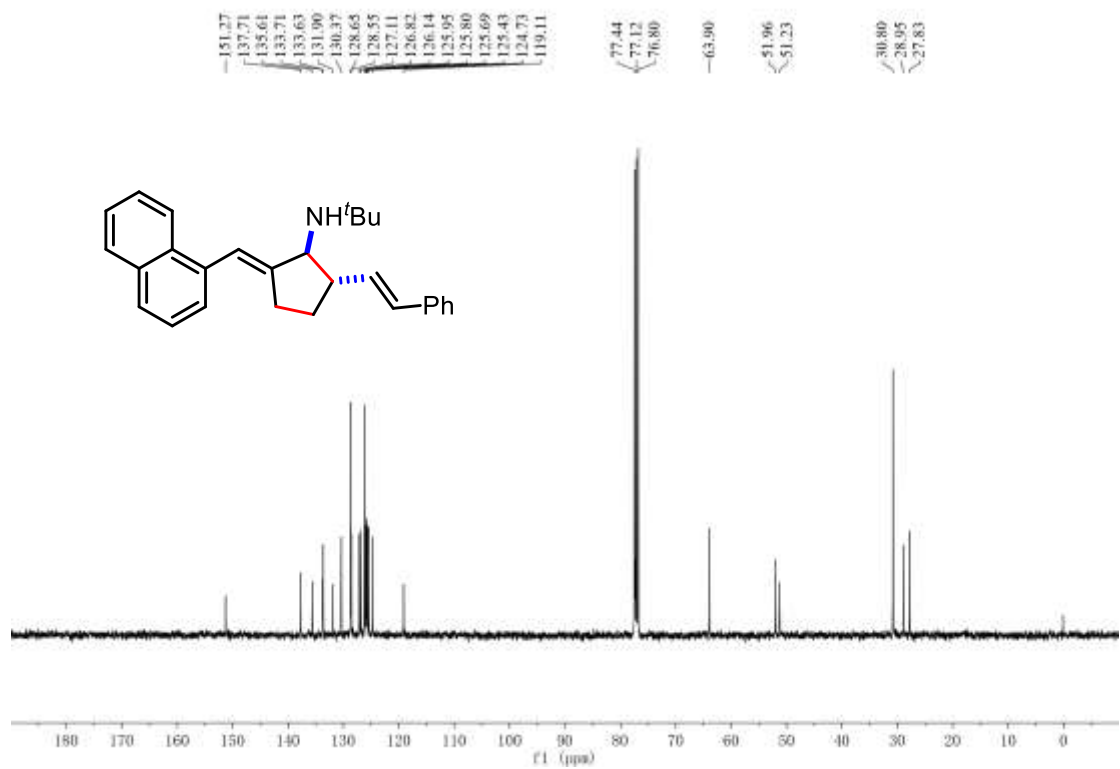

**<sup>1</sup>H NMR spectrum of *trans*-3ta (600 MHz, CDCl<sub>3</sub>)**

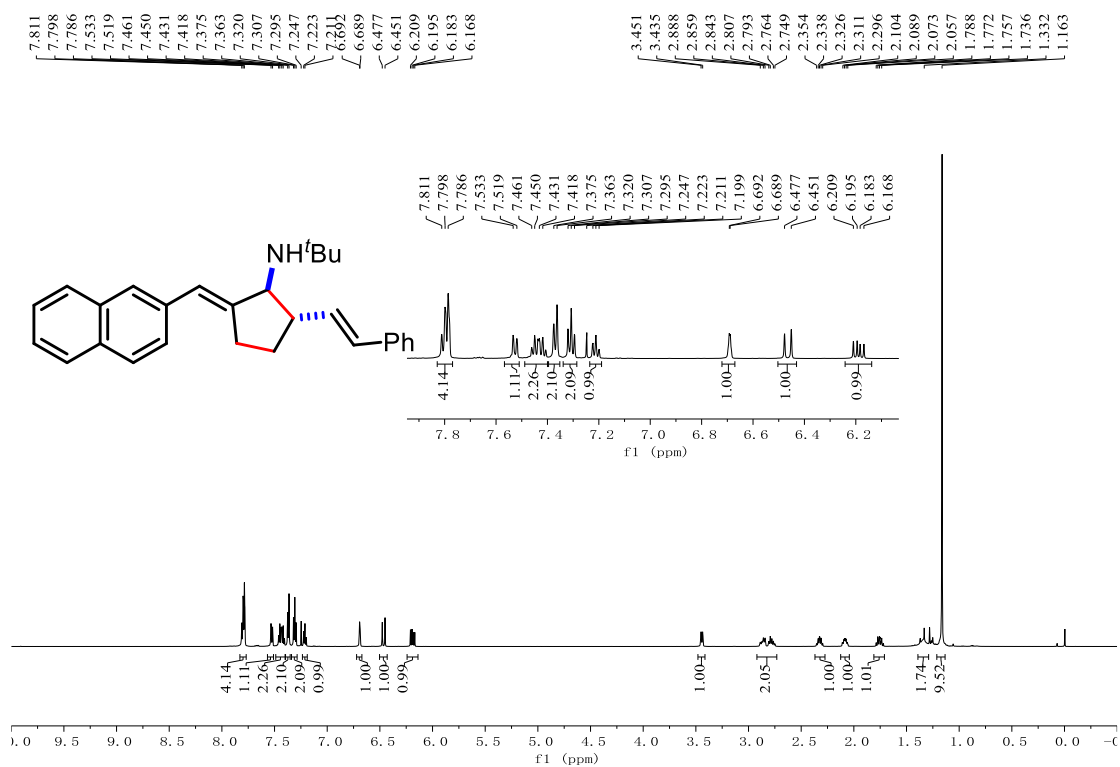

**<sup>13</sup>C NMR spectrum of *trans*-3ta (101 MHz, CDCl<sub>3</sub>)**

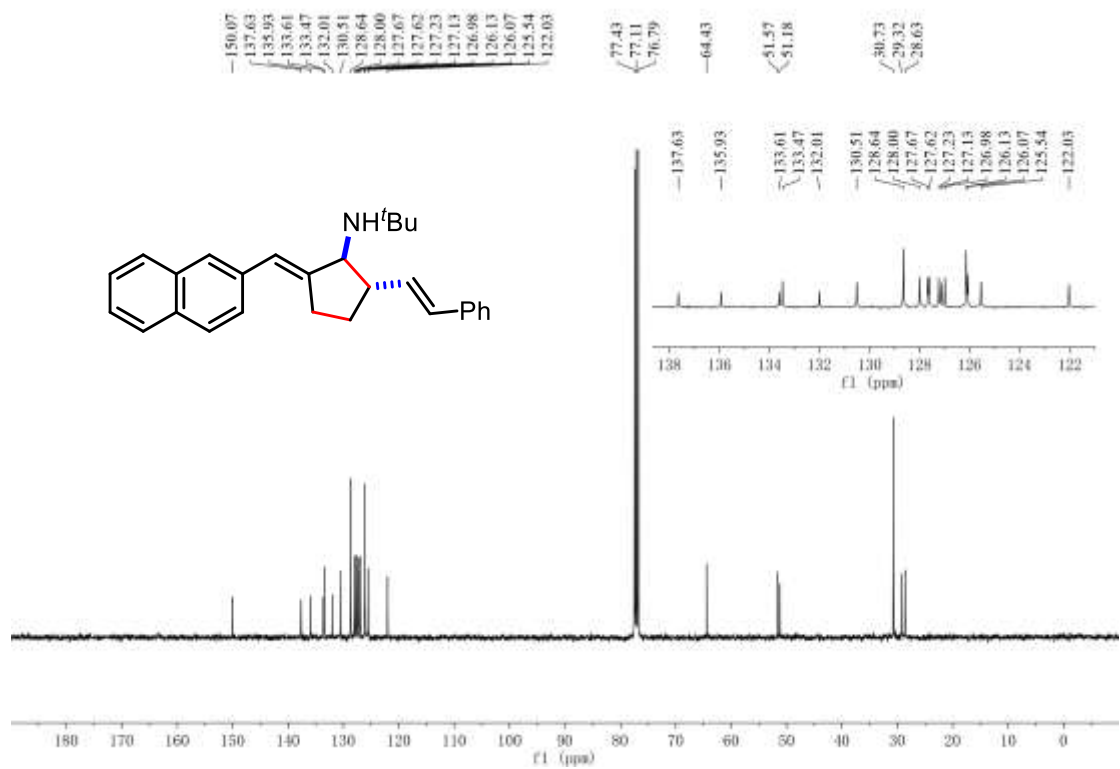

**<sup>1</sup>H NMR spectrum of *trans*-3ua (600 MHz, CDCl<sub>3</sub>)**

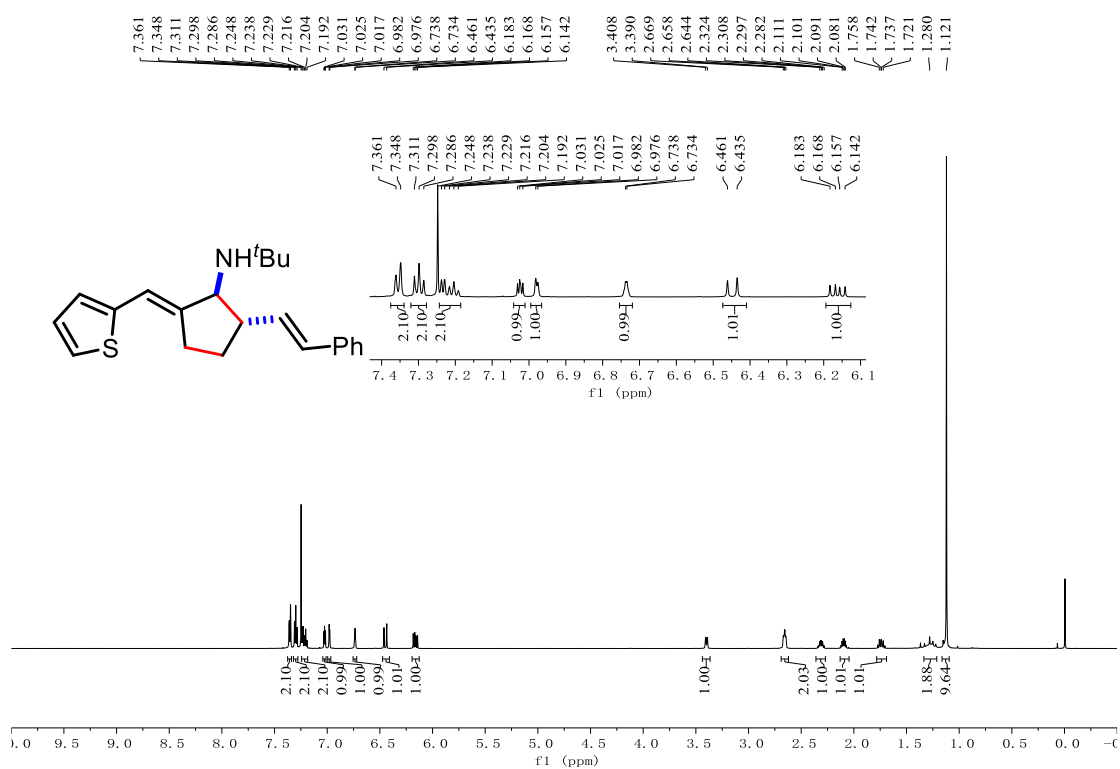

**<sup>13</sup>C NMR spectrum of *trans*-3ua (101 MHz, CDCl<sub>3</sub>)**

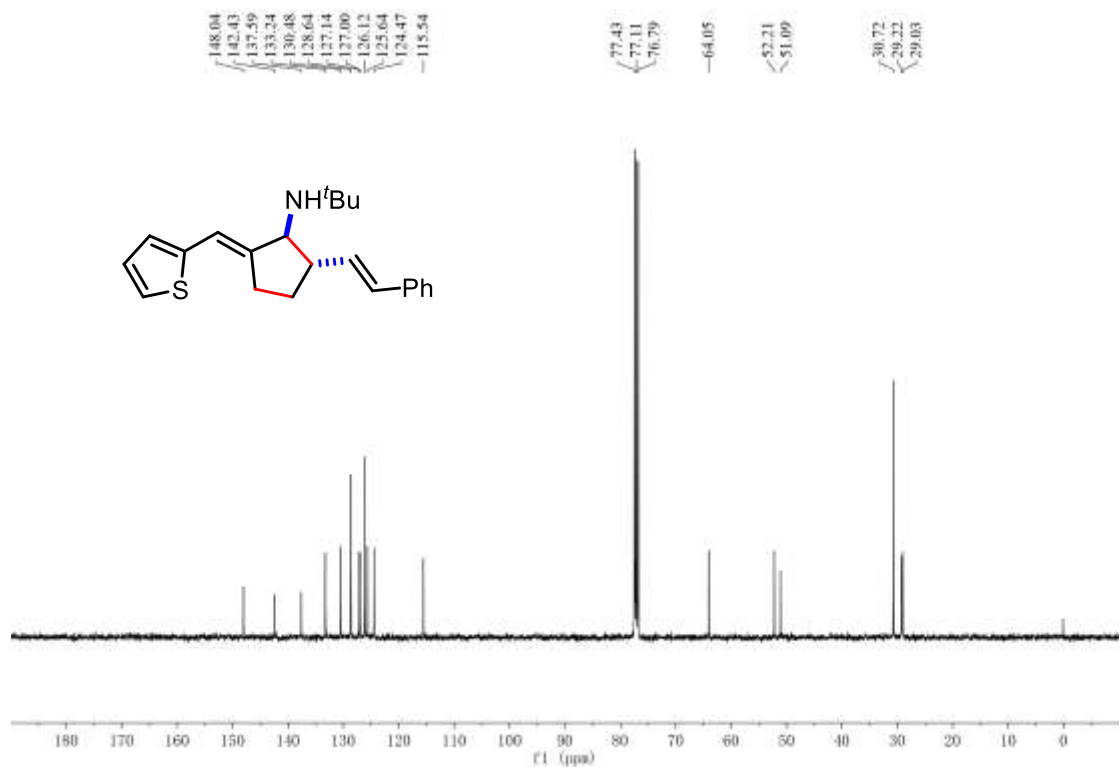

**<sup>1</sup>H NMR spectrum of *trans*-3va (600 MHz, CDCl<sub>3</sub>)**

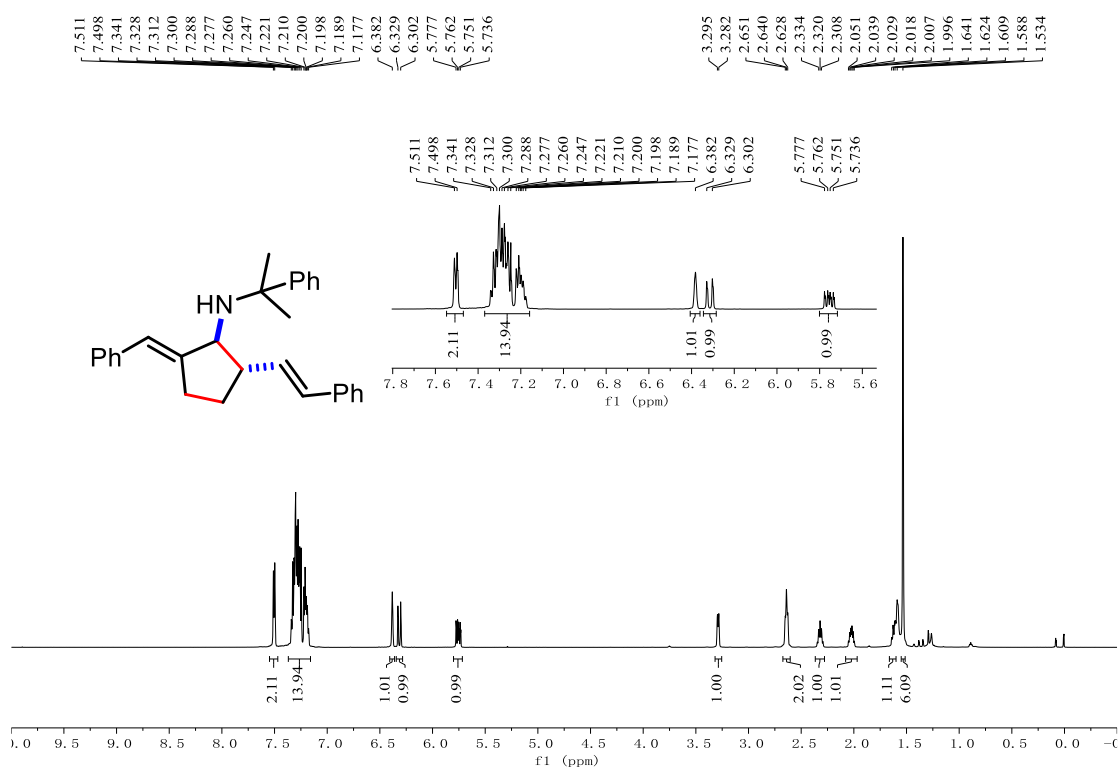

**<sup>13</sup>C NMR spectrum of *trans*-3va (101 MHz, CDCl<sub>3</sub>)**

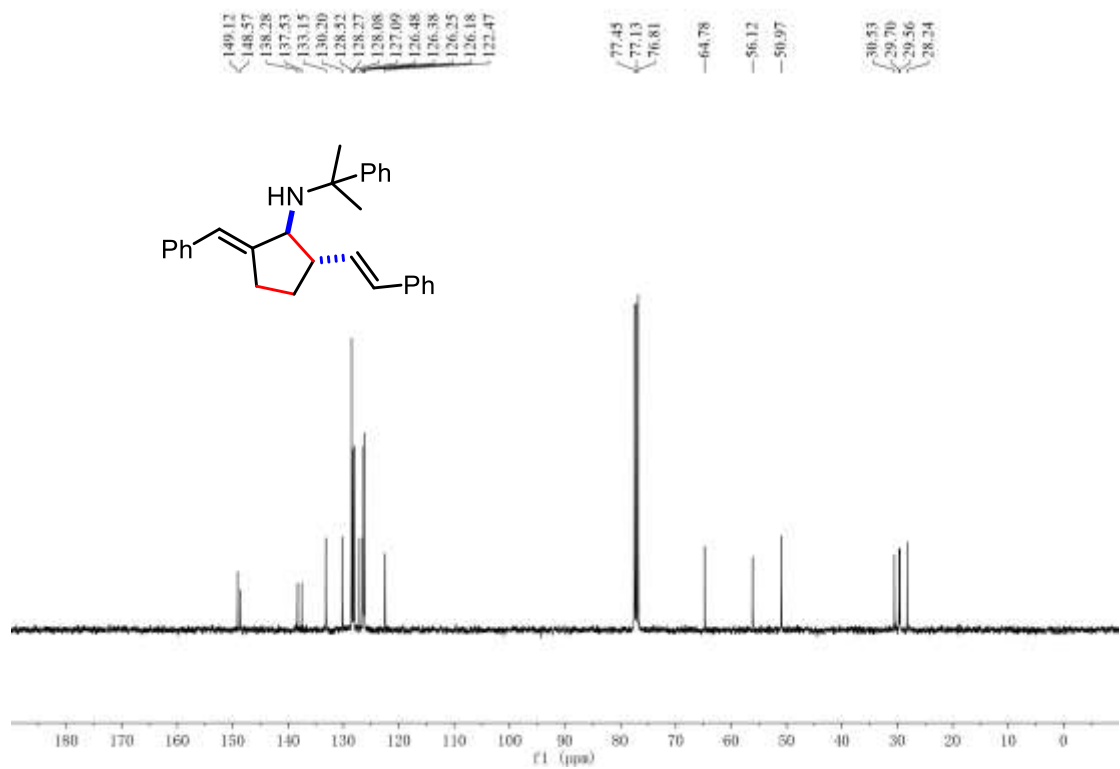



**<sup>1</sup>H NMR spectrum of *trans*-3xa (400 MHz, CDCl<sub>3</sub>)**

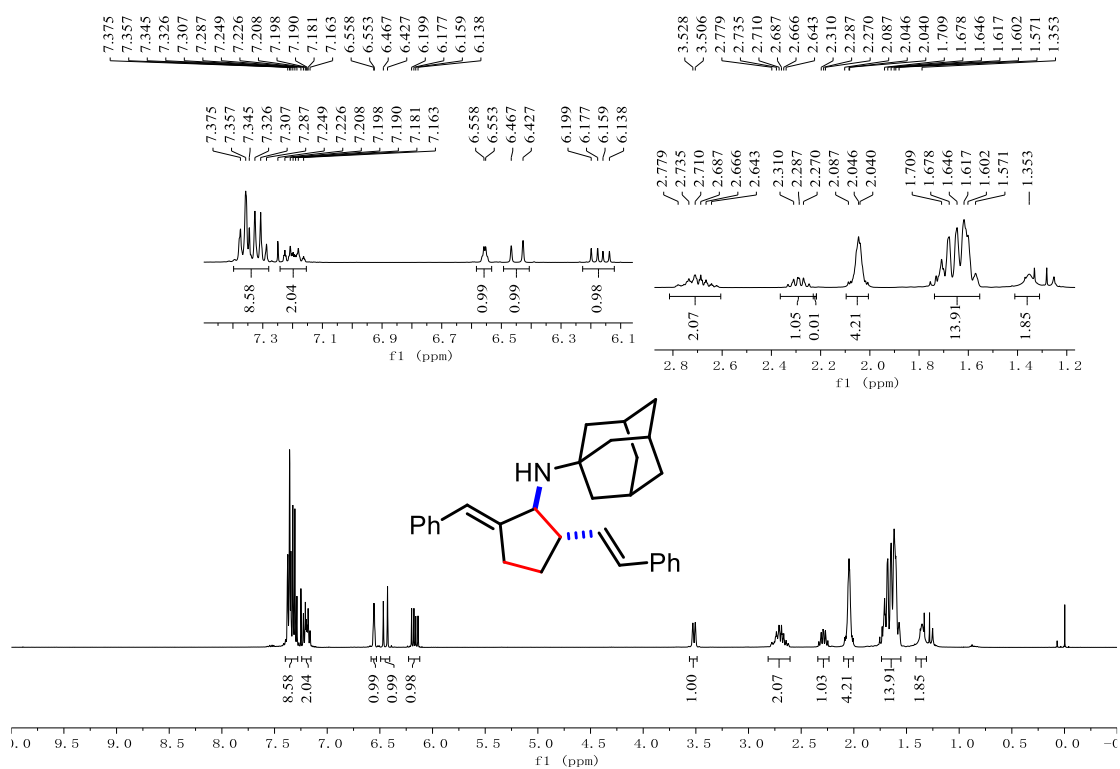

**<sup>13</sup>C NMR spectrum of *trans*-3xa (101 MHz, CDCl<sub>3</sub>)**

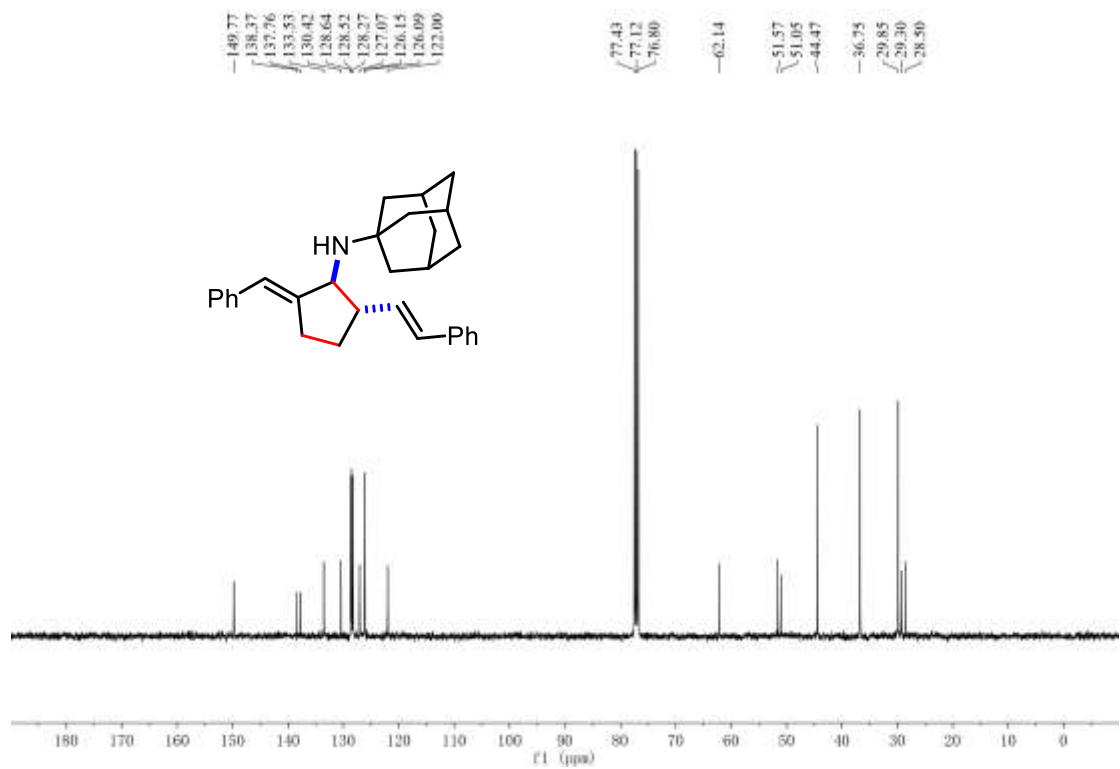

**<sup>1</sup>H NMR spectrum of *trans*-3ya (400 MHz, CDCl<sub>3</sub>)**

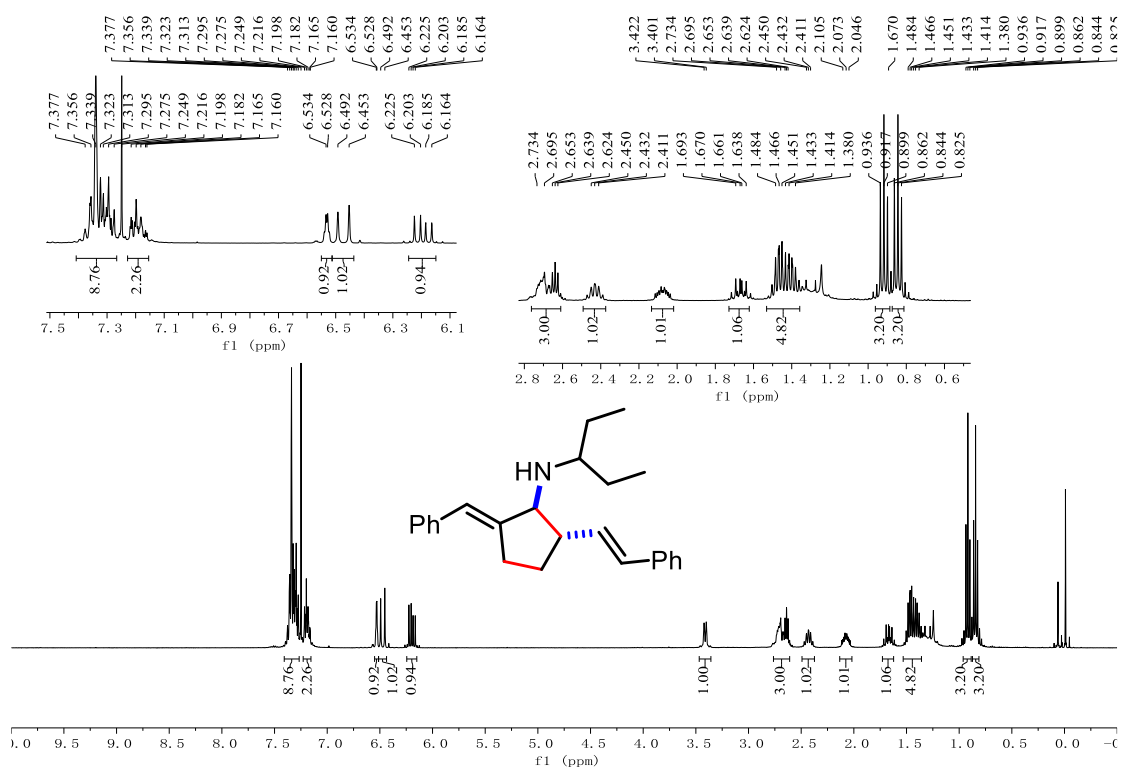

**<sup>13</sup>C NMR spectrum of *trans*-3ya (101 MHz, CDCl<sub>3</sub>)**

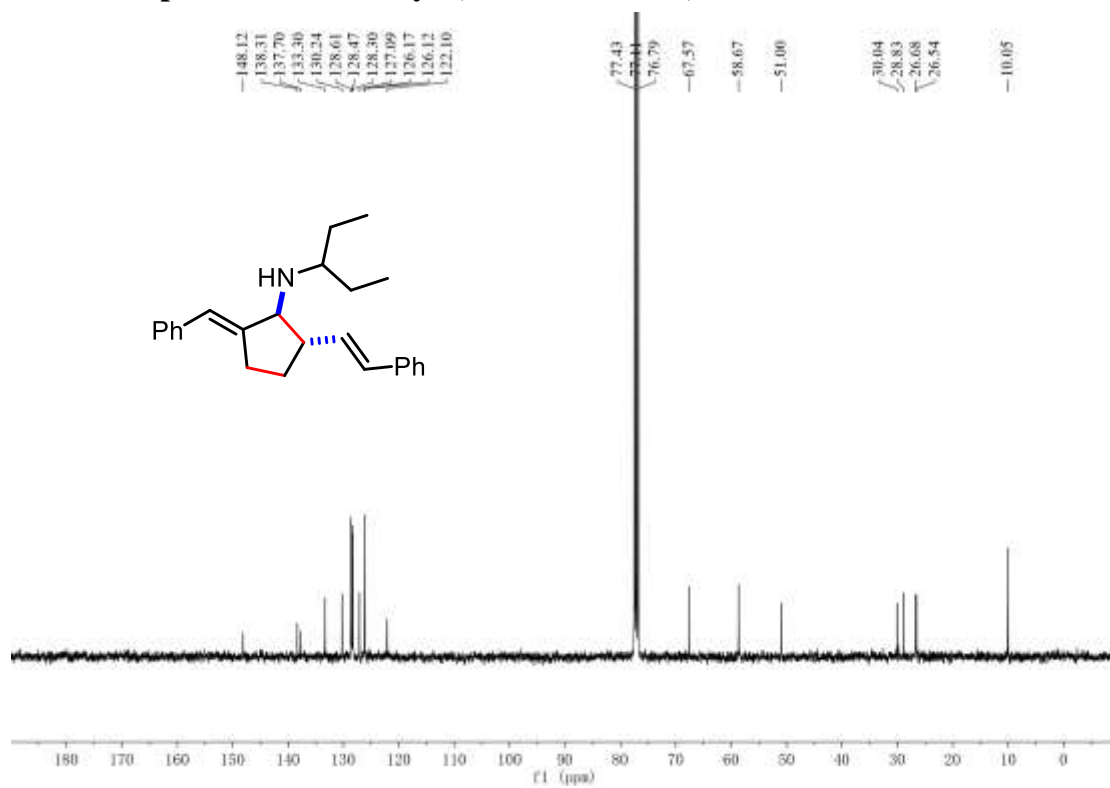

**<sup>1</sup>H NMR spectrum of *trans*-3za (Sc-1) (400 MHz, CDCl<sub>3</sub>)**

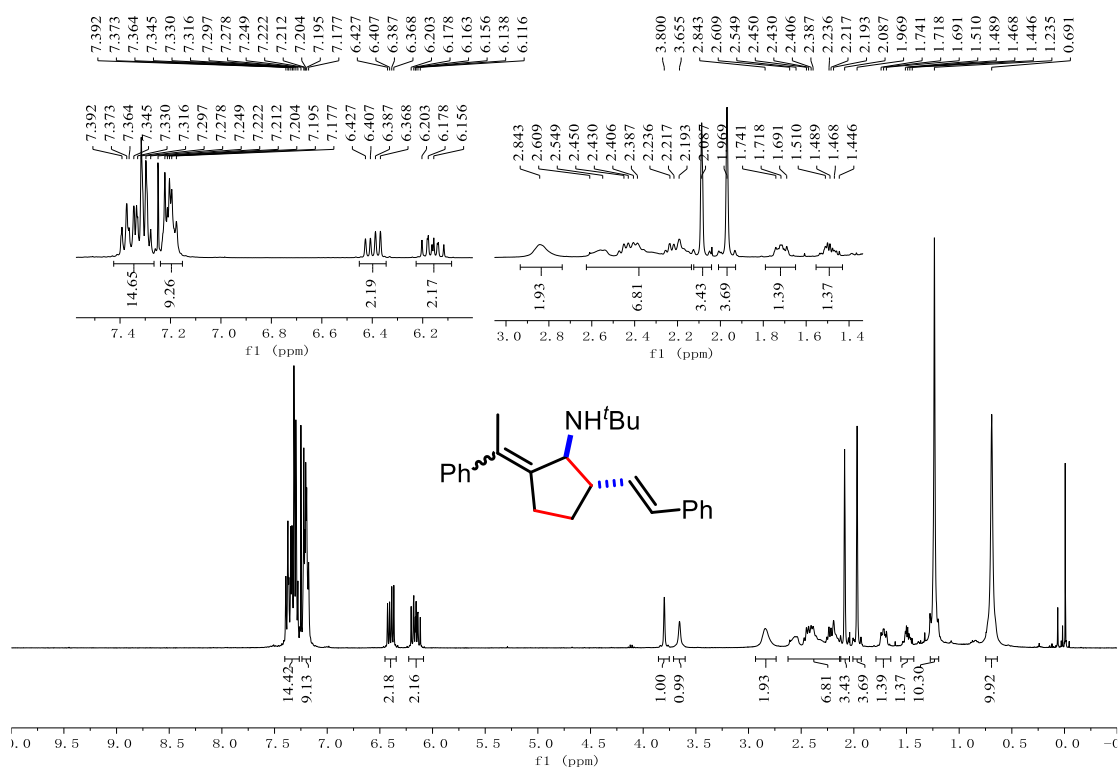

**<sup>13</sup>C NMR spectrum of *trans*-3za (Sc-1) (101 MHz, CDCl<sub>3</sub>)**

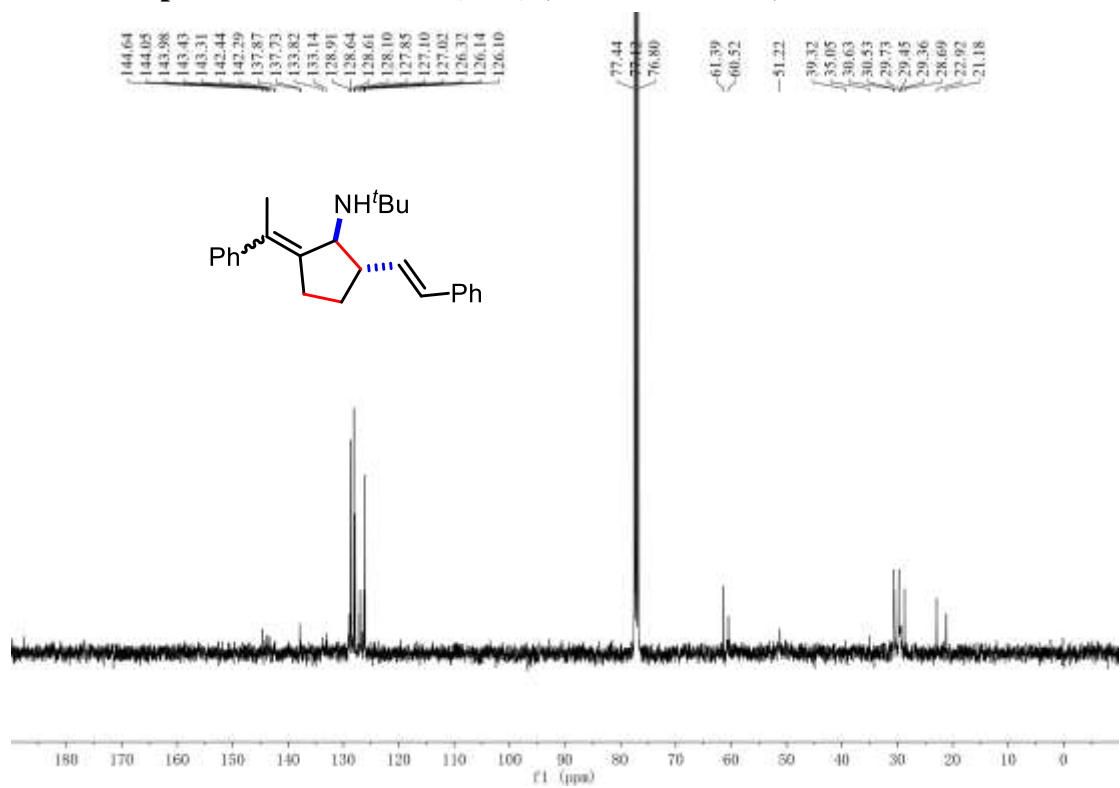

**<sup>1</sup>H NMR spectrum of *trans*-3za (Y-2) (400 MHz, CDCl<sub>3</sub>)**

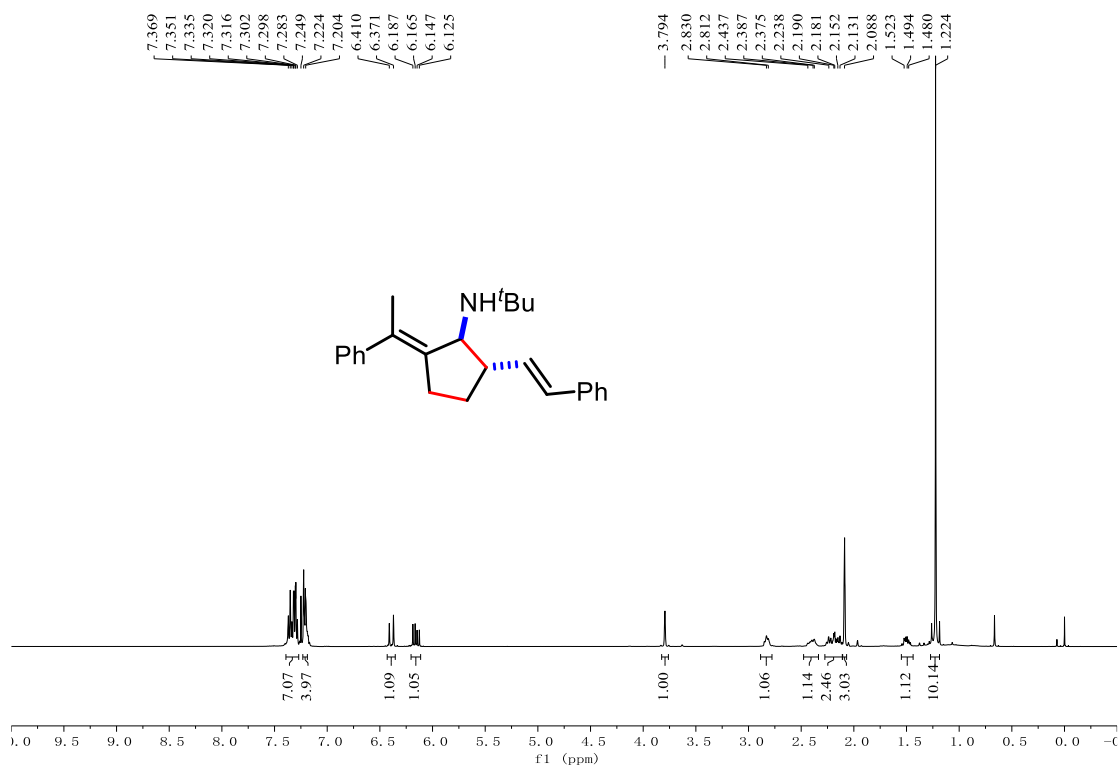

**<sup>13</sup>C NMR spectrum of *trans*-3za (Y-2) (101 MHz, CDCl<sub>3</sub>)**

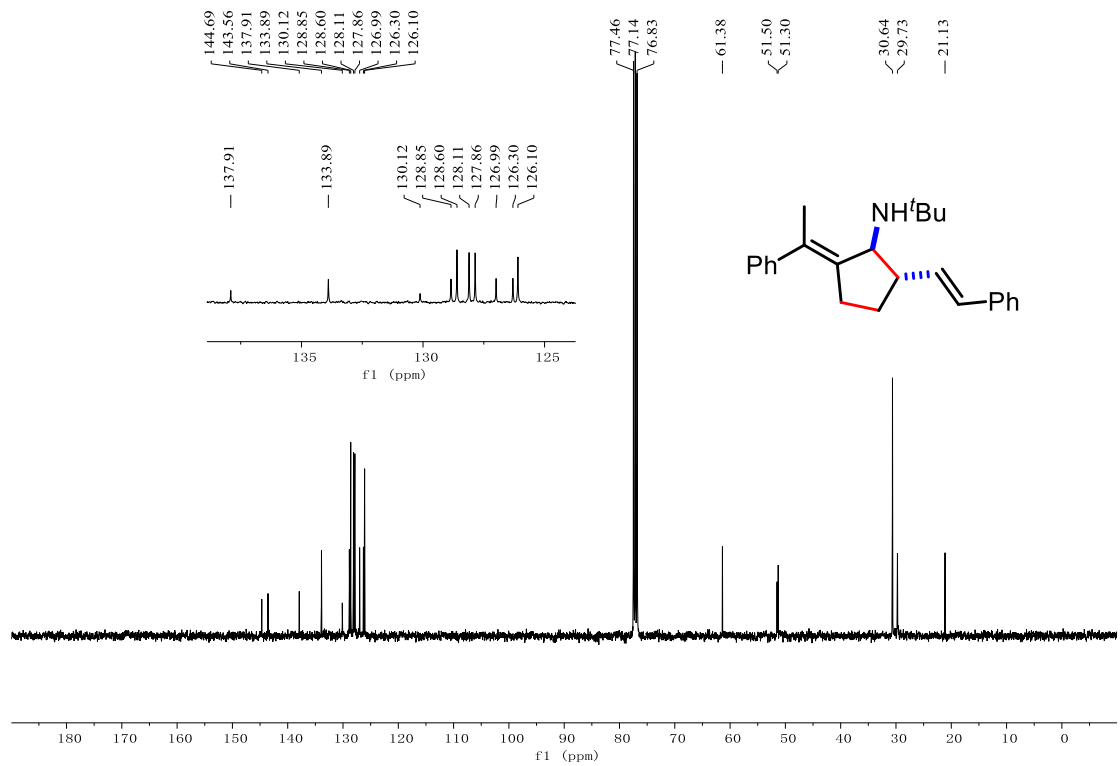

**<sup>135</sup>DEPT NMR spectrum of *trans*-3za (Y-2)**

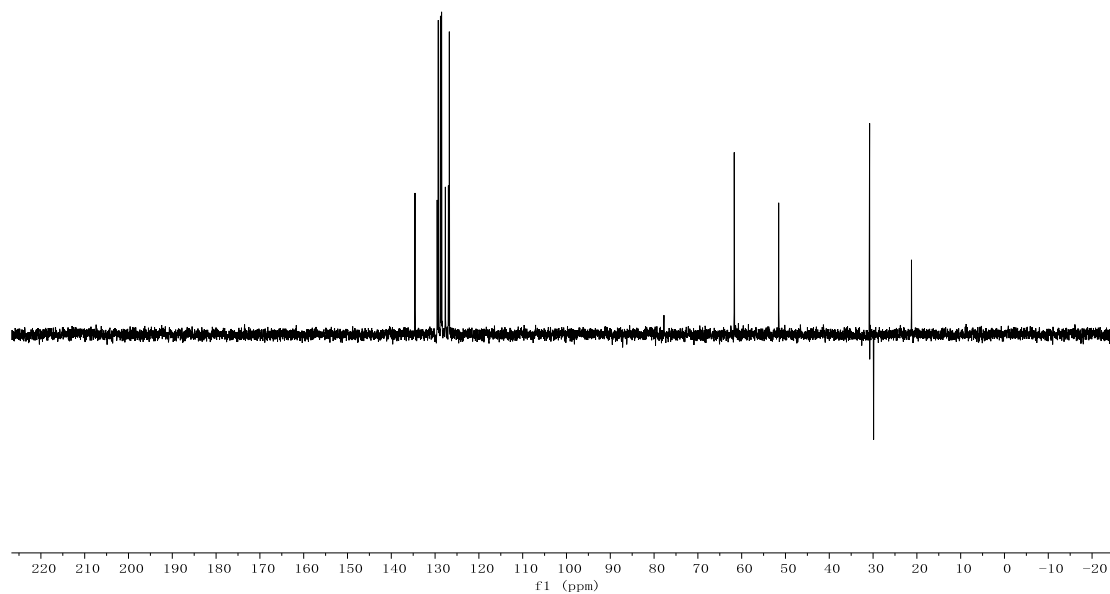

**HMBC spectrum of *trans*-3za (Y-2)**

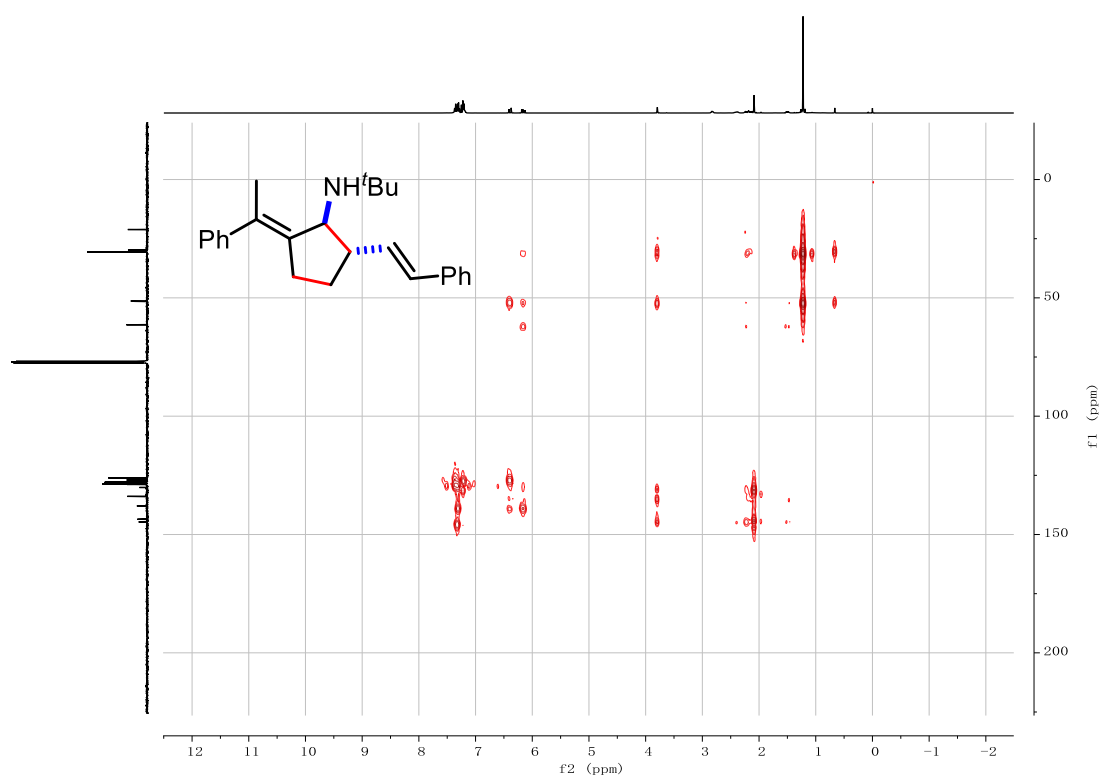

HSQC spectrum of *trans*-3za (Y-2)

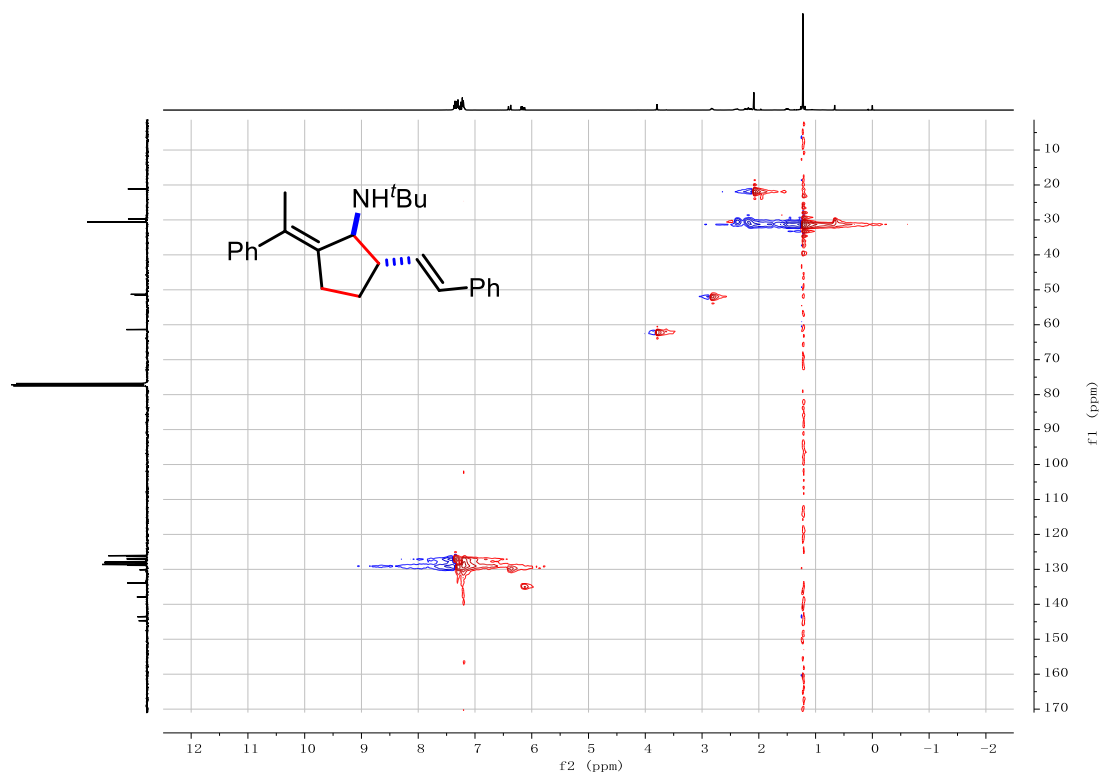

HMQC spectrum of *trans*-3za (Y-2)

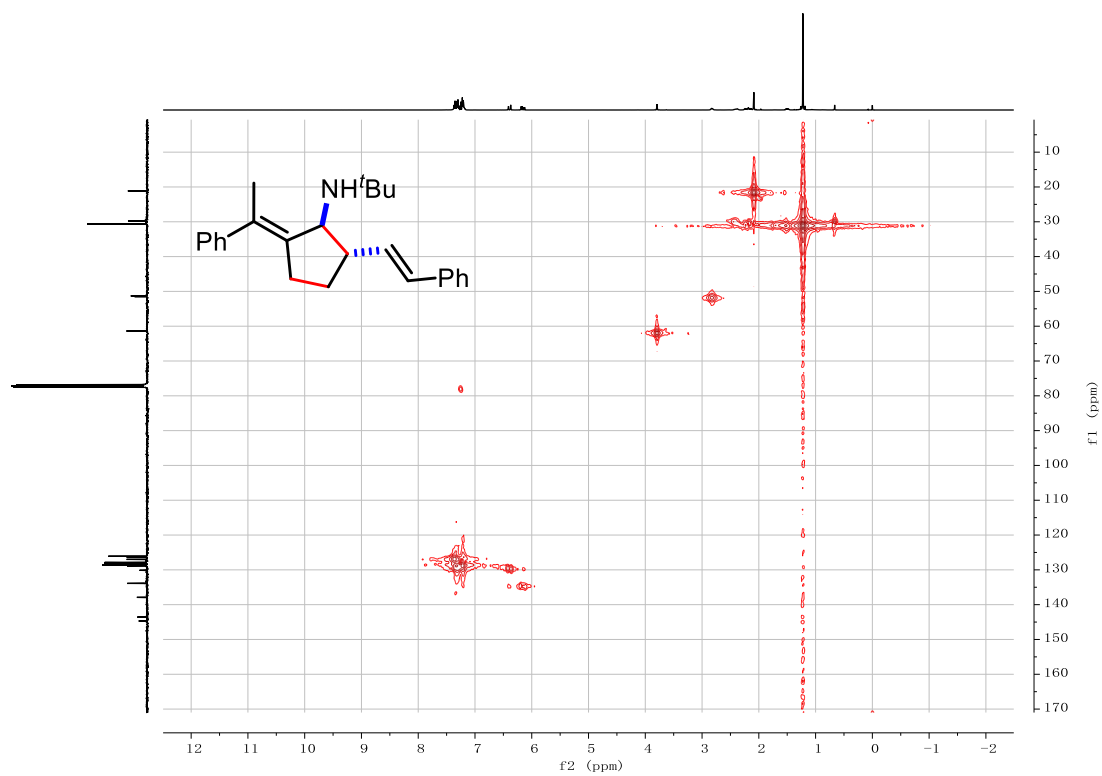

COSY spectrum of *trans*-3za (Y-2)

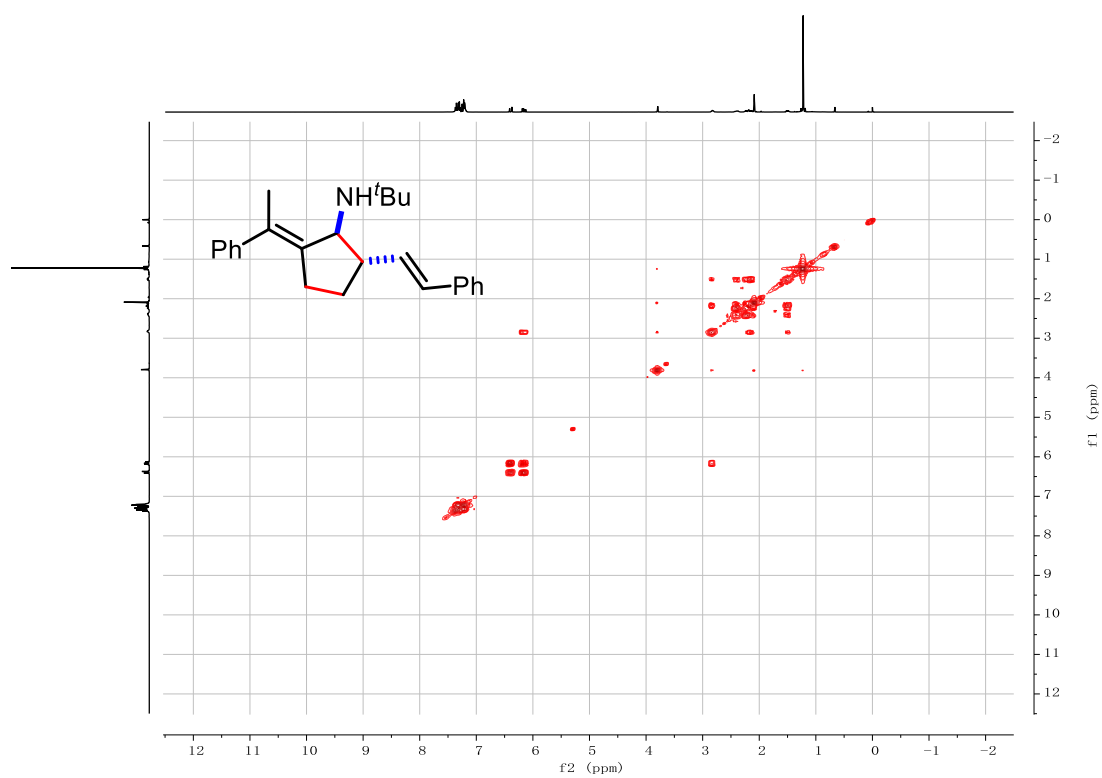

NOE spectrum of *trans*-3za (Y-2)

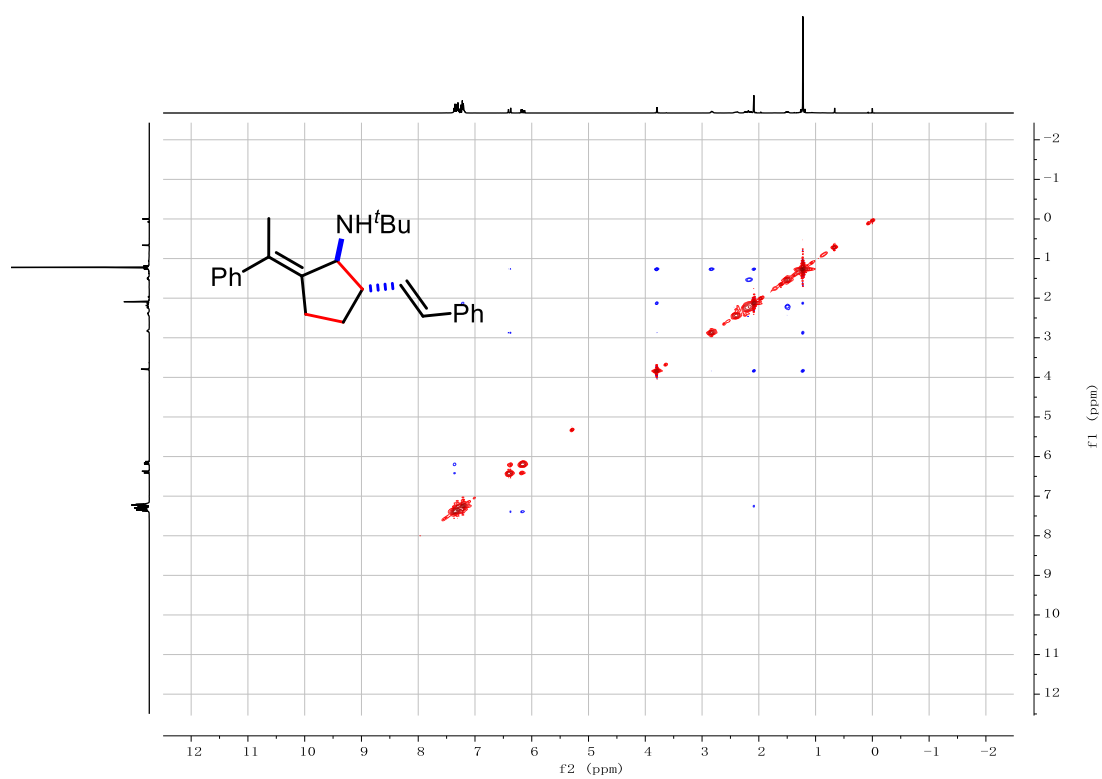

**<sup>1</sup>H NMR spectrum of *trans,E*-3aaa (Y-2) (400 MHz, CDCl<sub>3</sub>)**

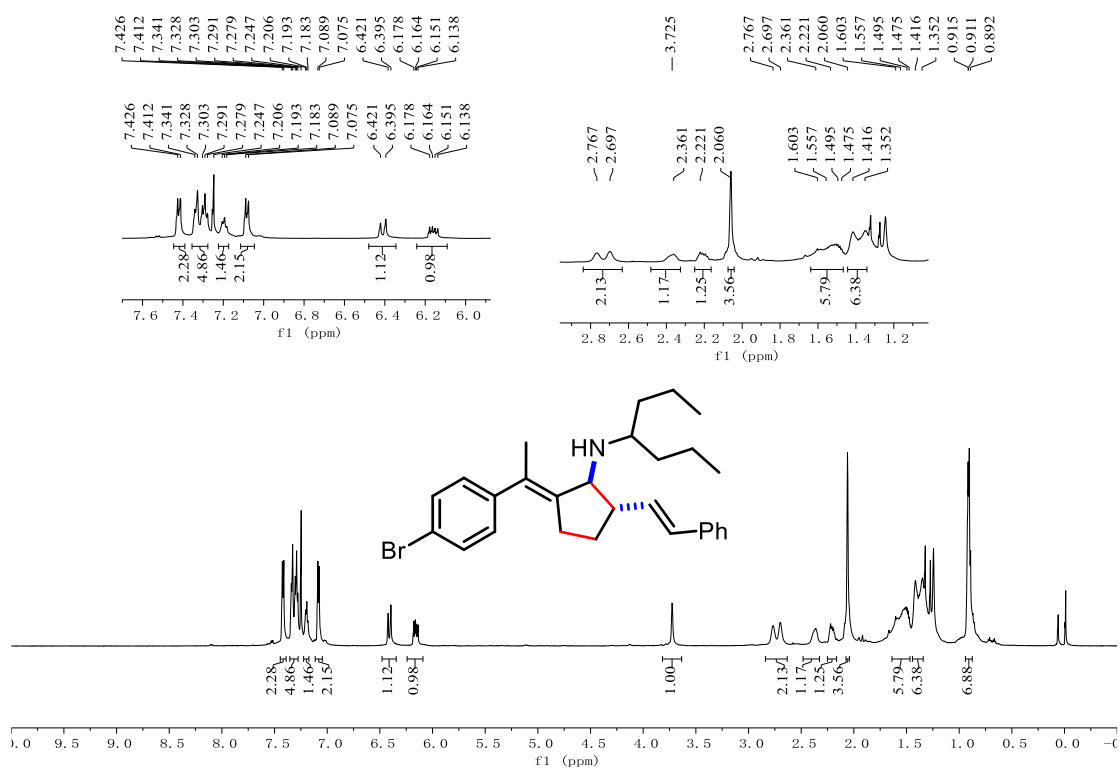

**<sup>13</sup>C NMR spectrum of *trans,E*-3aaa (Y-2) (101 MHz, CDCl<sub>3</sub>)**

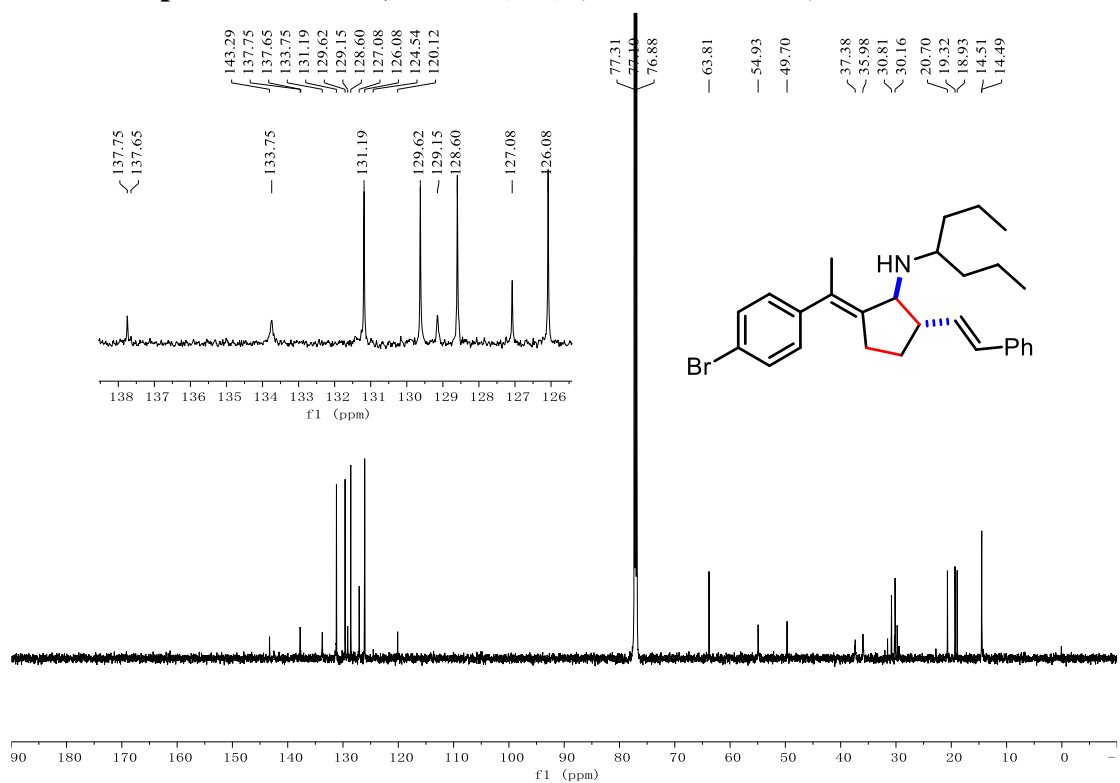

**<sup>1</sup>H NMR spectrum of *trans,Z*-3aaa (Y-2) (400 MHz, CDCl<sub>3</sub>)**

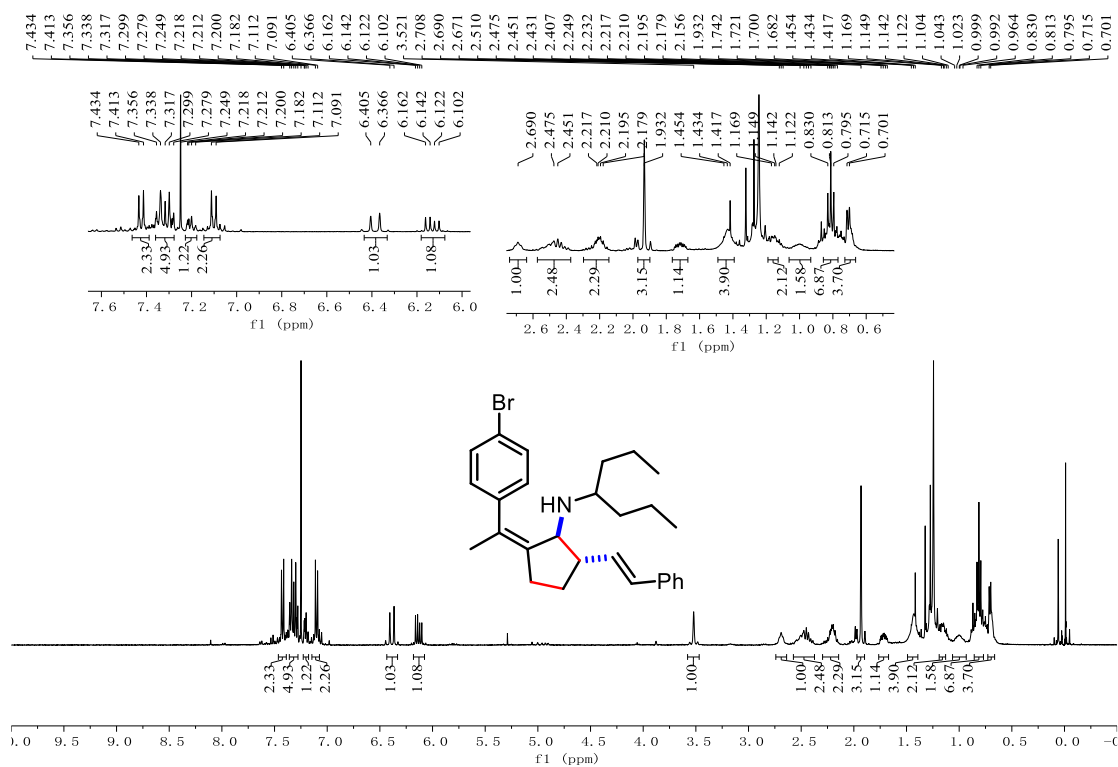

**<sup>13</sup>C NMR spectrum of *trans,Z*-3aaa (Y-2) (101 MHz, CDCl<sub>3</sub>)**

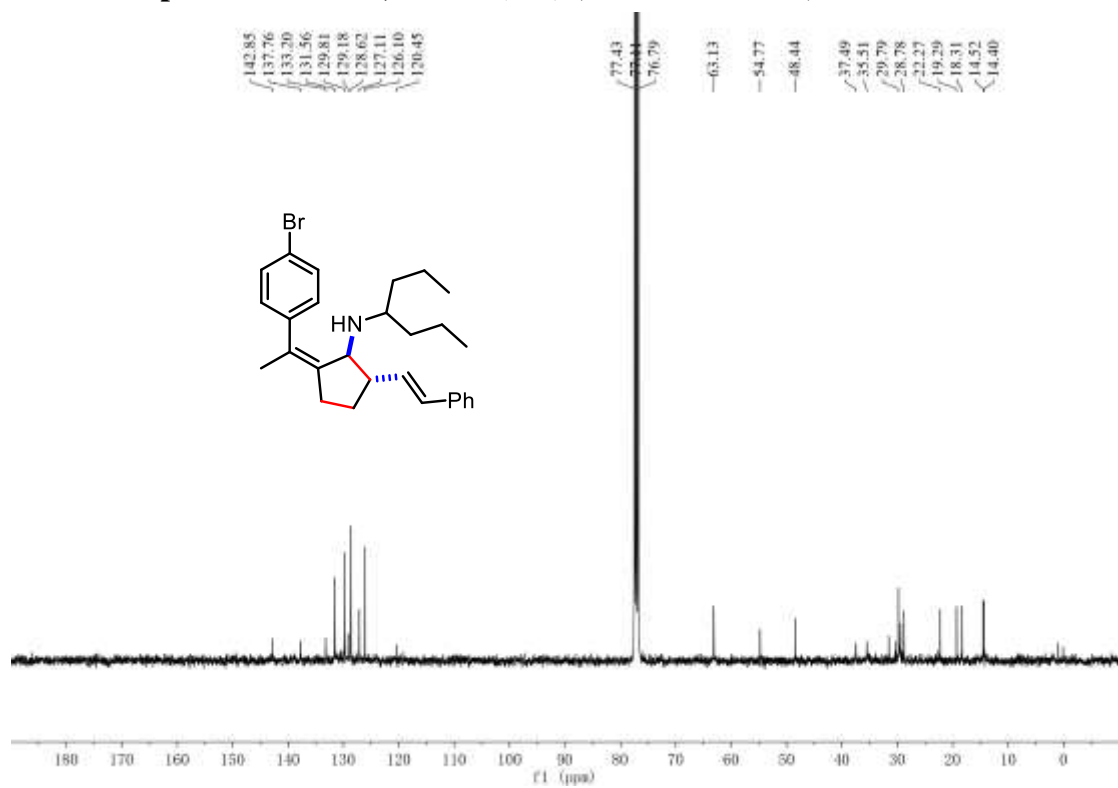

**<sup>1</sup>H NMR spectrum of *trans*-3aba (Sc-1) (400 MHz, CDCl<sub>3</sub>)**

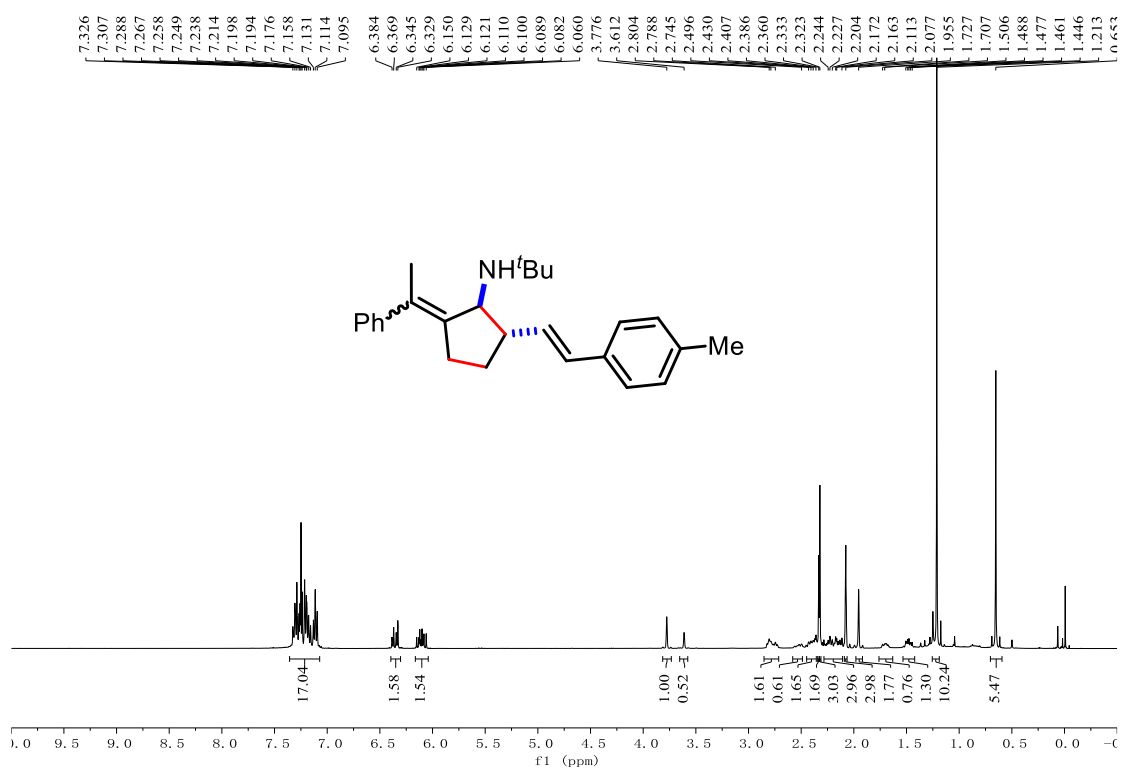

**<sup>13</sup>C NMR spectrum of *trans*-3aba (Sc-1) (101 MHz, CDCl<sub>3</sub>)**

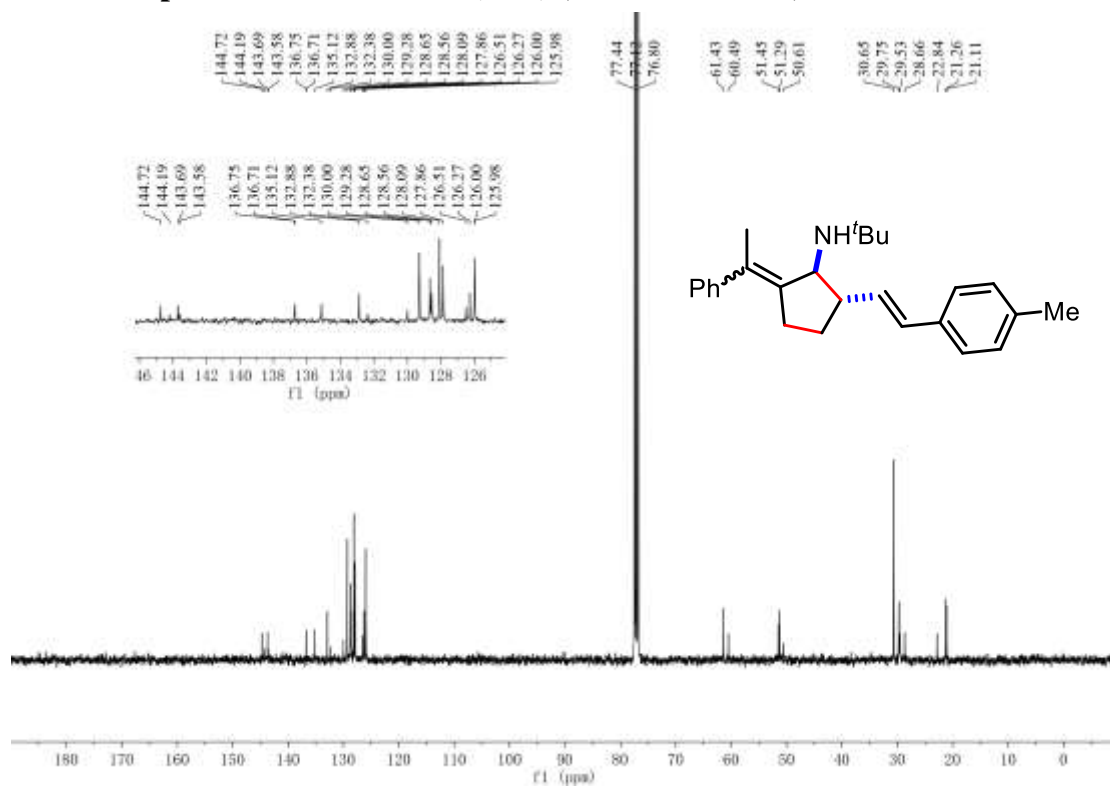

**<sup>1</sup>H NMR spectrum of *trans*-3aba (Y-2) (400 MHz, CDCl<sub>3</sub>)**

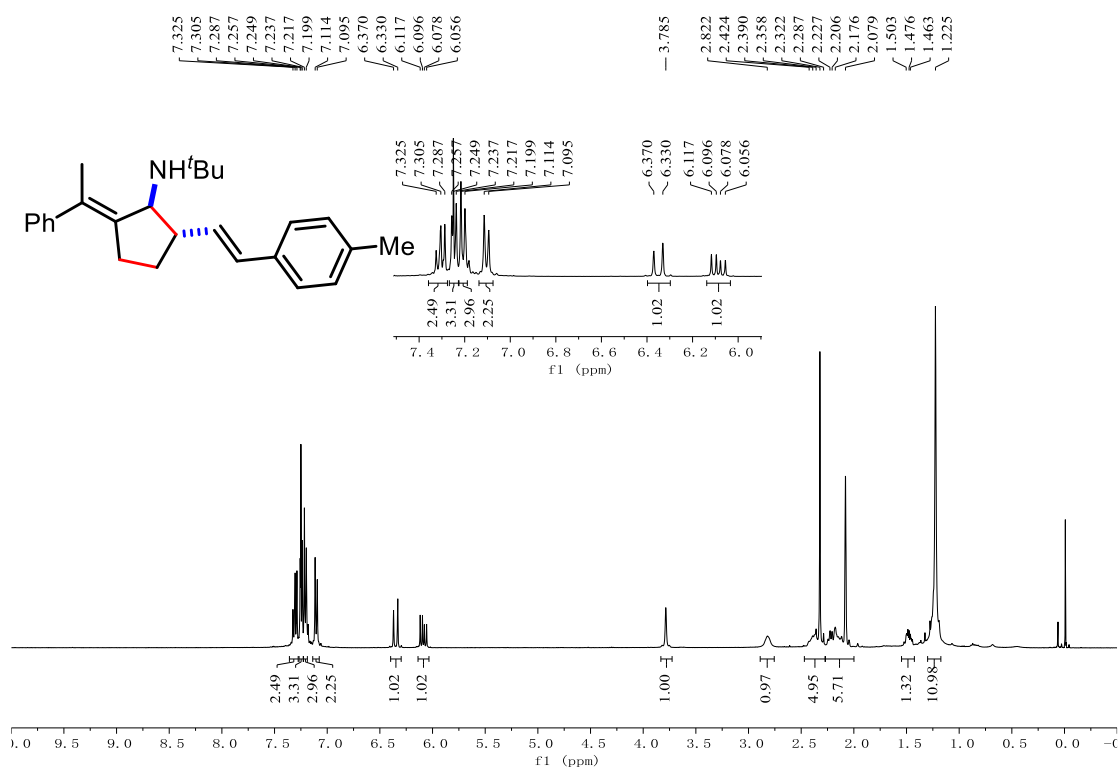

**<sup>13</sup>C NMR spectrum of *trans*-3aba (Y-2) (101 MHz, CDCl<sub>3</sub>)**

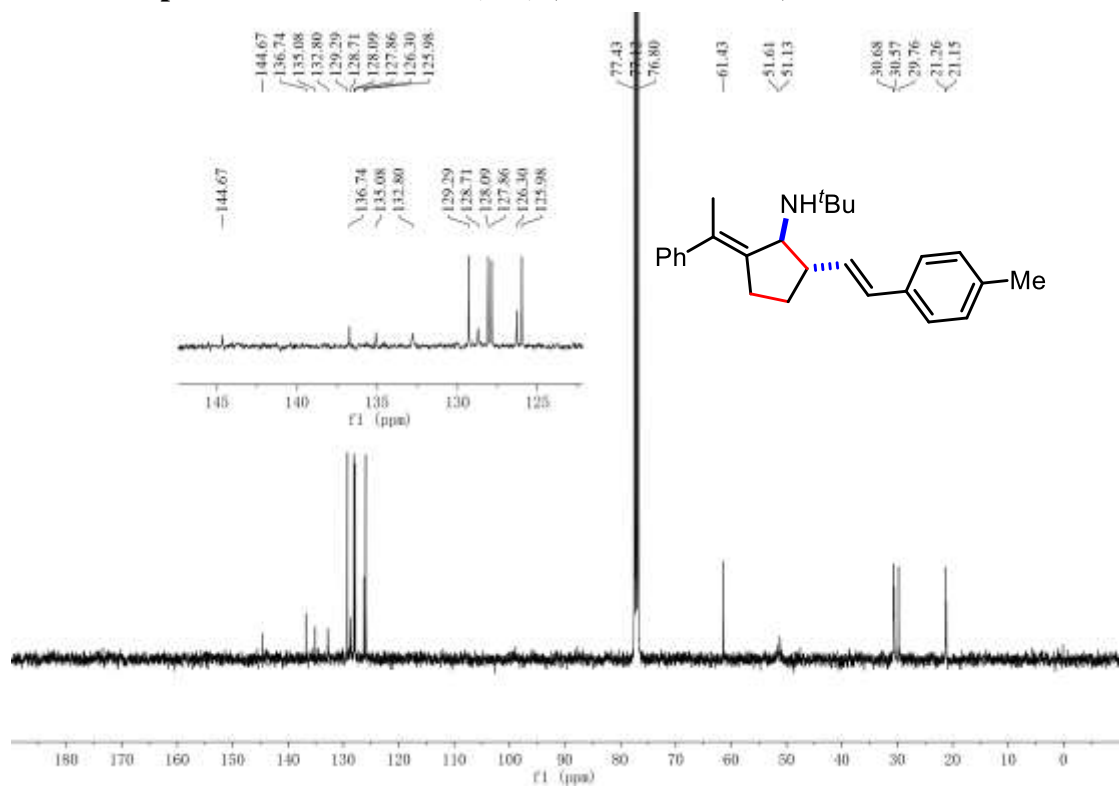

**<sup>1</sup>H NMR spectrum of *trans*-3aca (Sc-1) (400 MHz, CDCl<sub>3</sub>)**

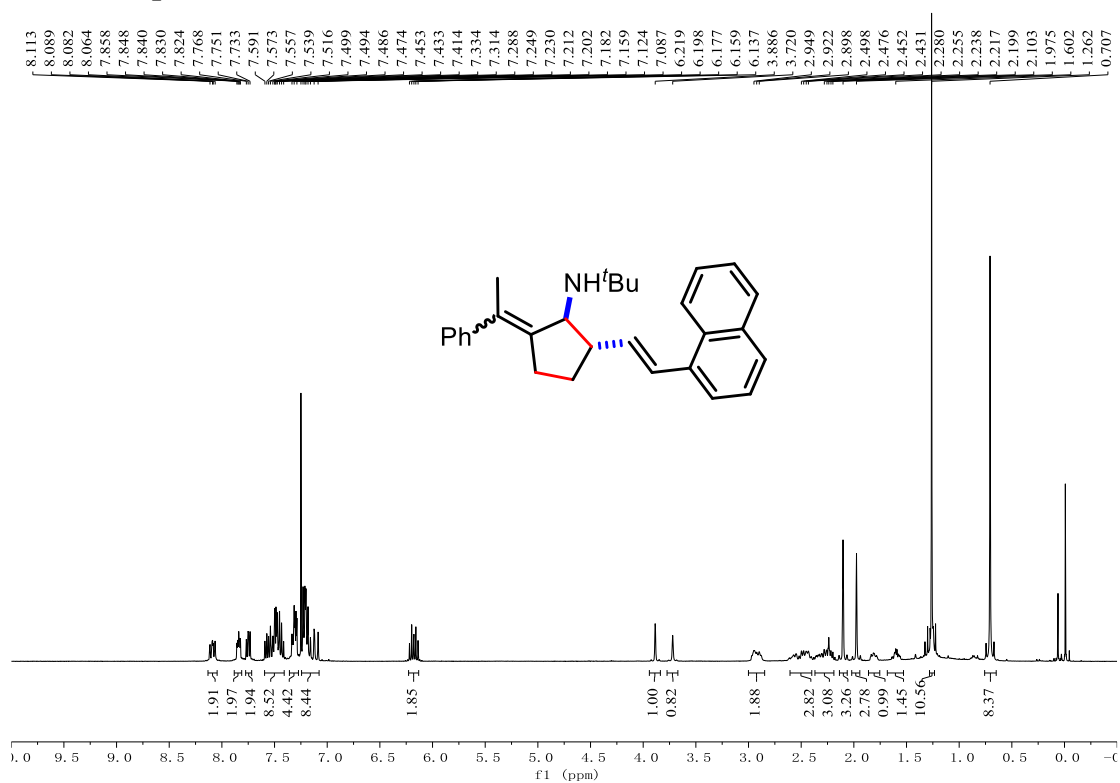

**<sup>13</sup>C NMR spectrum of *trans*-3aca (Sc-1) (101 MHz, CDCl<sub>3</sub>)**

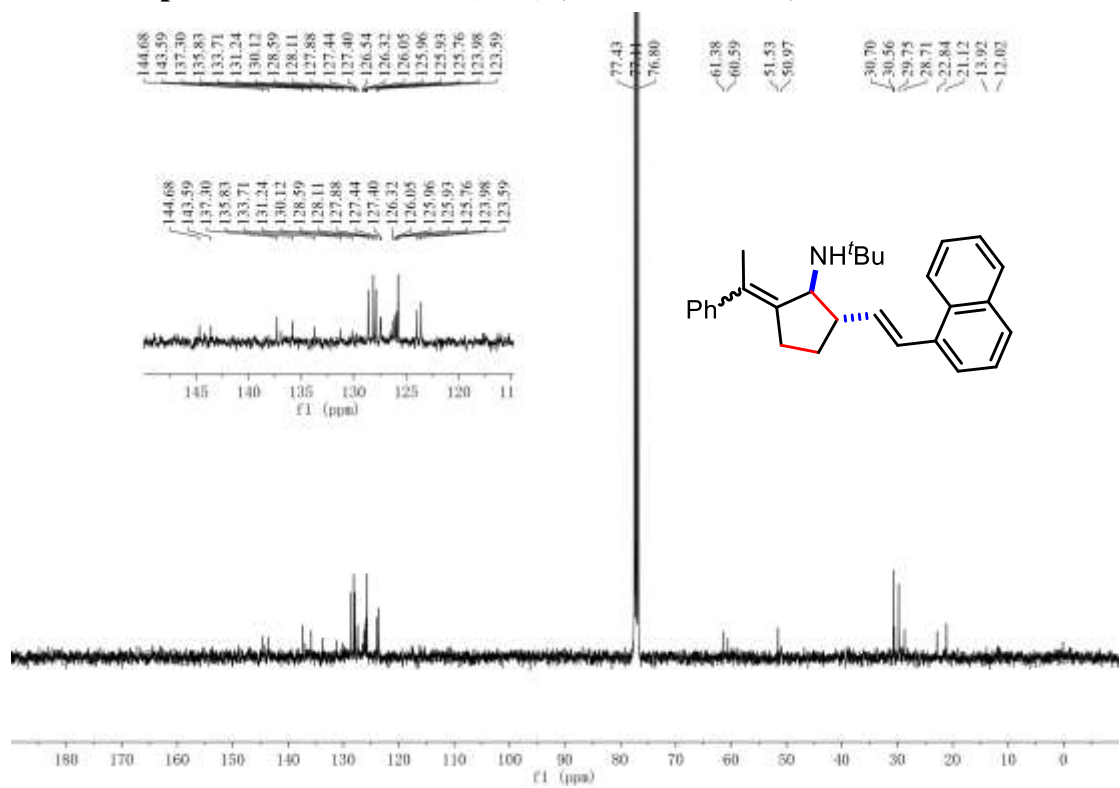

<sup>1</sup>H NMR spectrum of *trans*-3aca (Y-2) (400 MHz, CDCl<sub>3</sub>)

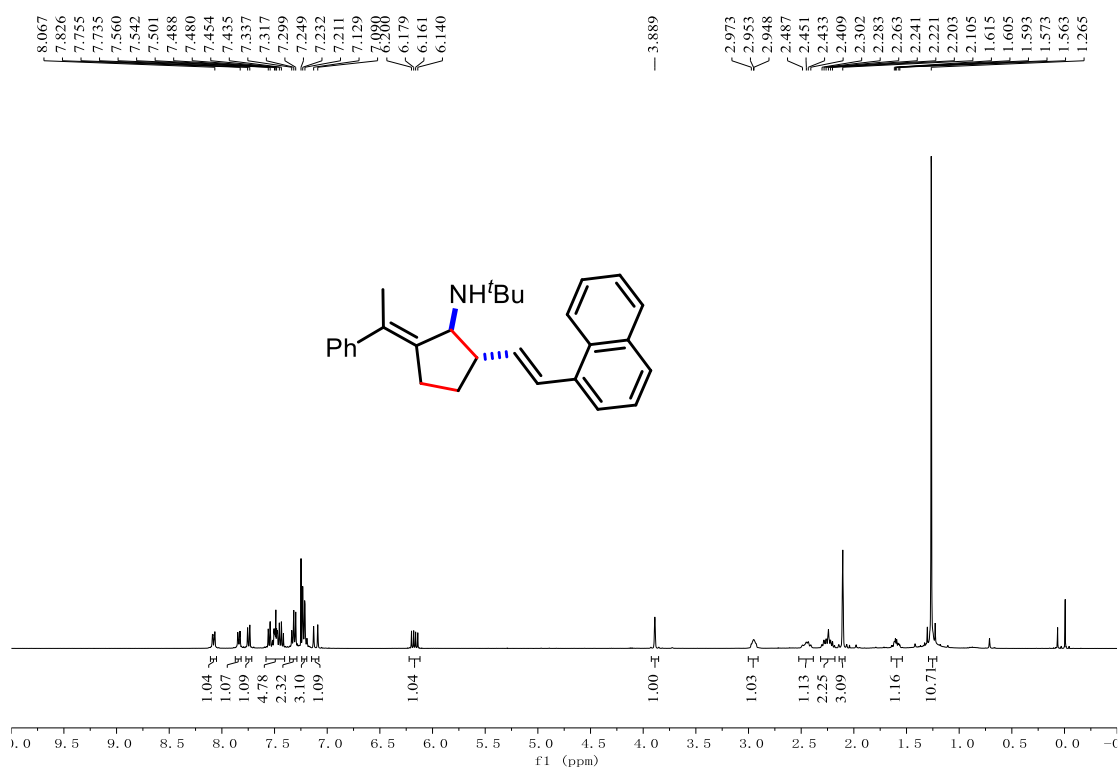

<sup>13</sup>C NMR spectrum of *trans*-3aca (Y-2) (101 MHz, CDCl<sub>3</sub>)

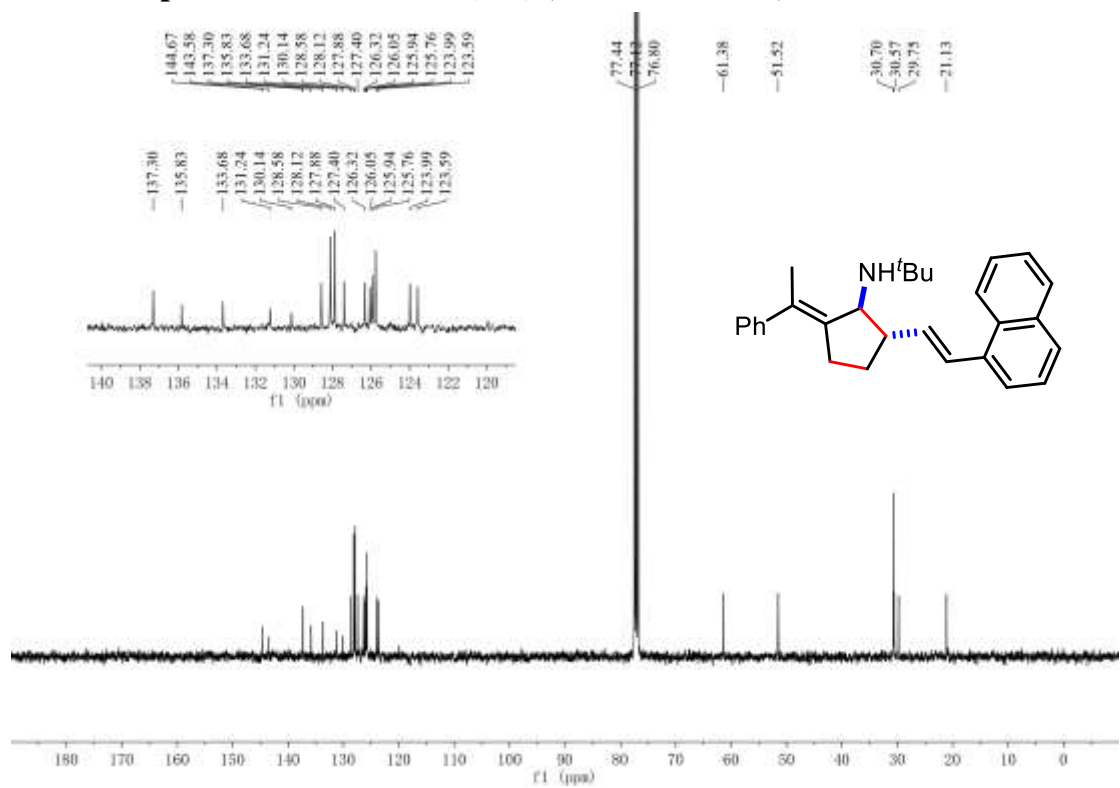

**<sup>1</sup>H NMR spectrum of *trans*-3ab (600 MHz, CDCl<sub>3</sub>)**

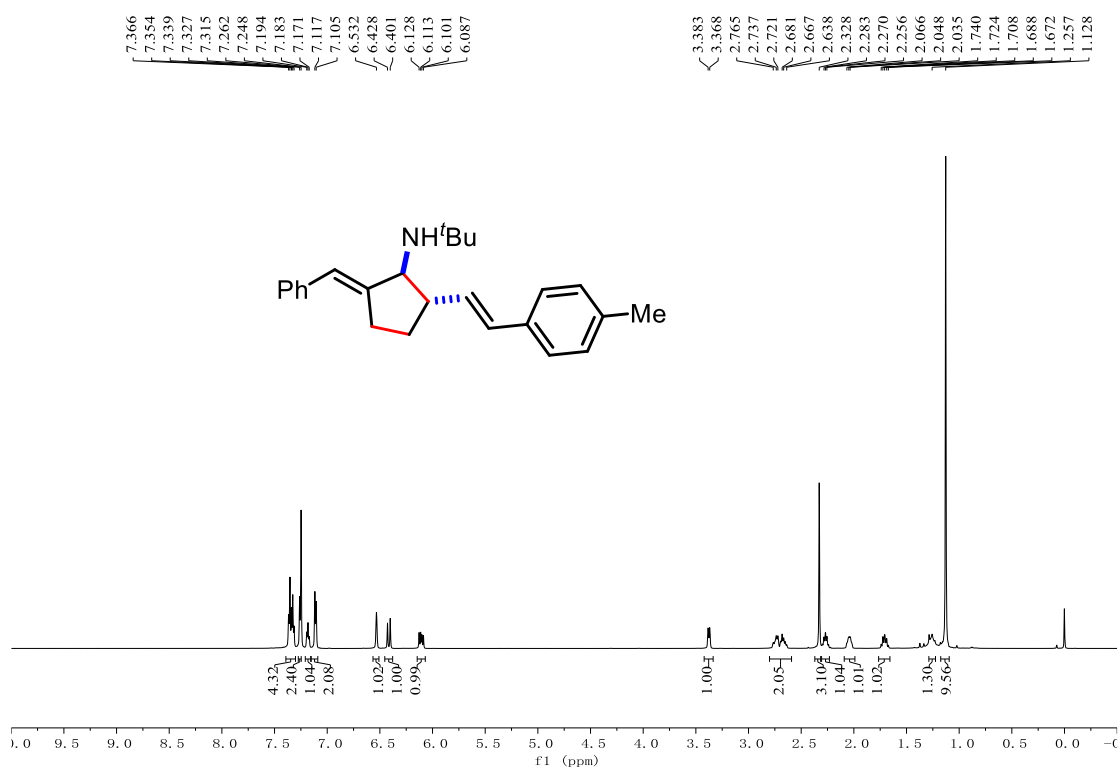

**<sup>13</sup>C NMR spectrum of *trans*-3ab (101 MHz, CDCl<sub>3</sub>)**

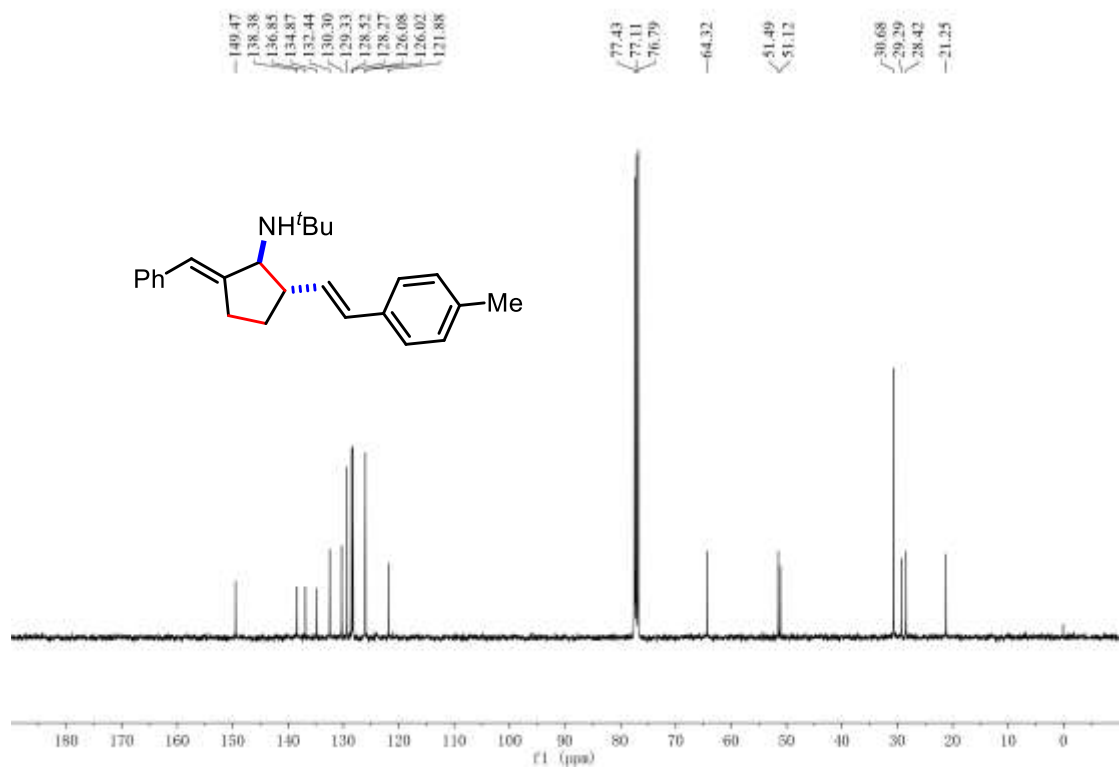

**<sup>1</sup>H NMR spectrum of *trans*-3ac (400 MHz, CDCl<sub>3</sub>)**

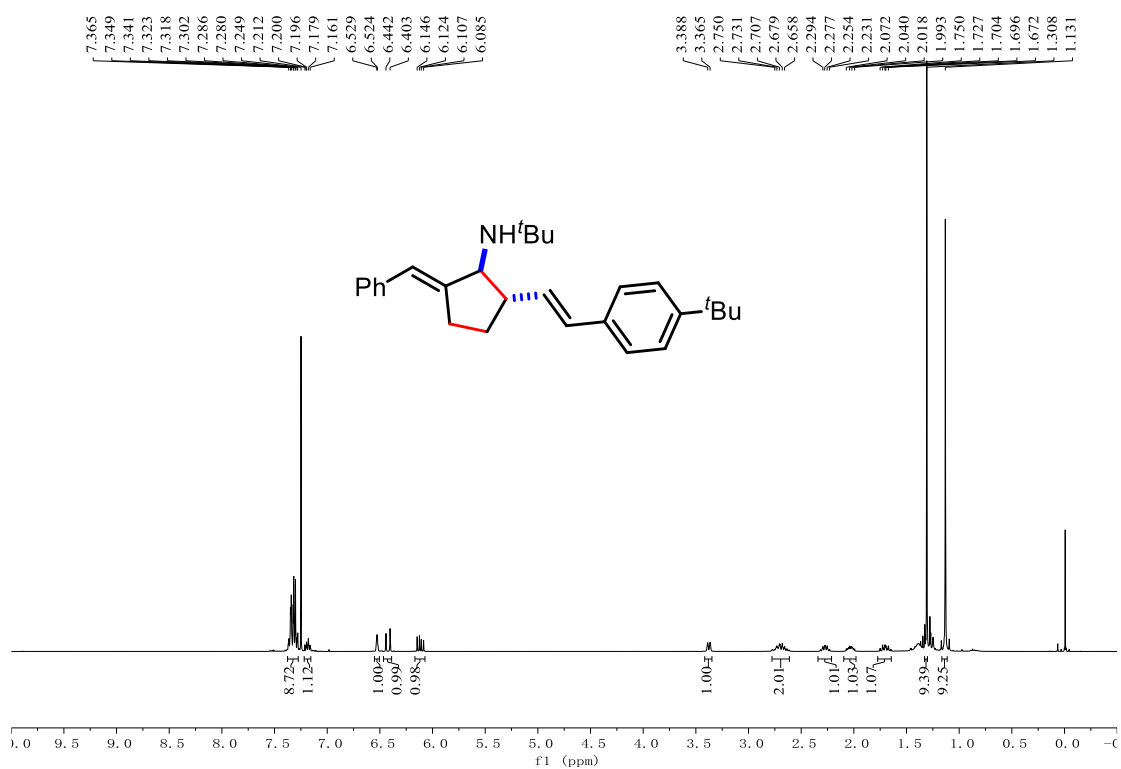

**<sup>13</sup>C NMR spectrum of *trans*-3ac (101 MHz, CDCl<sub>3</sub>)**

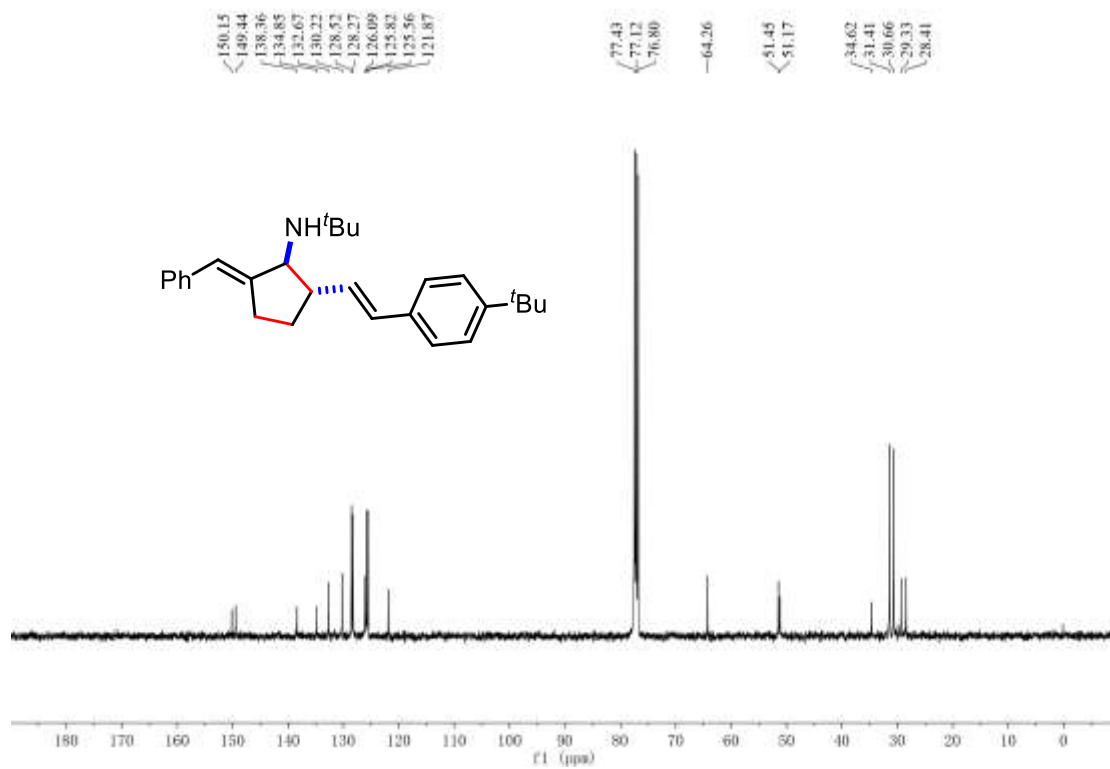

**<sup>1</sup>H NMR spectrum of *trans*-3ad (400 MHz, CDCl<sub>3</sub>)**

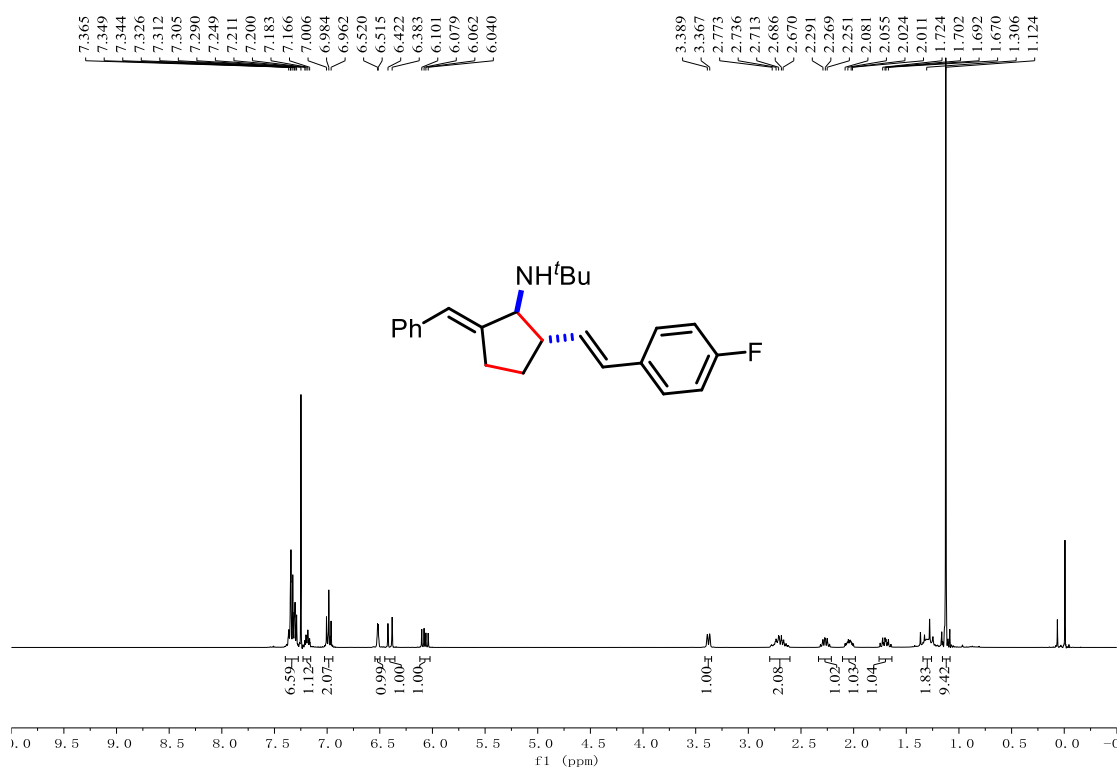

**<sup>13</sup>C NMR spectrum of *trans*-3ad (101 MHz, CDCl<sub>3</sub>)**

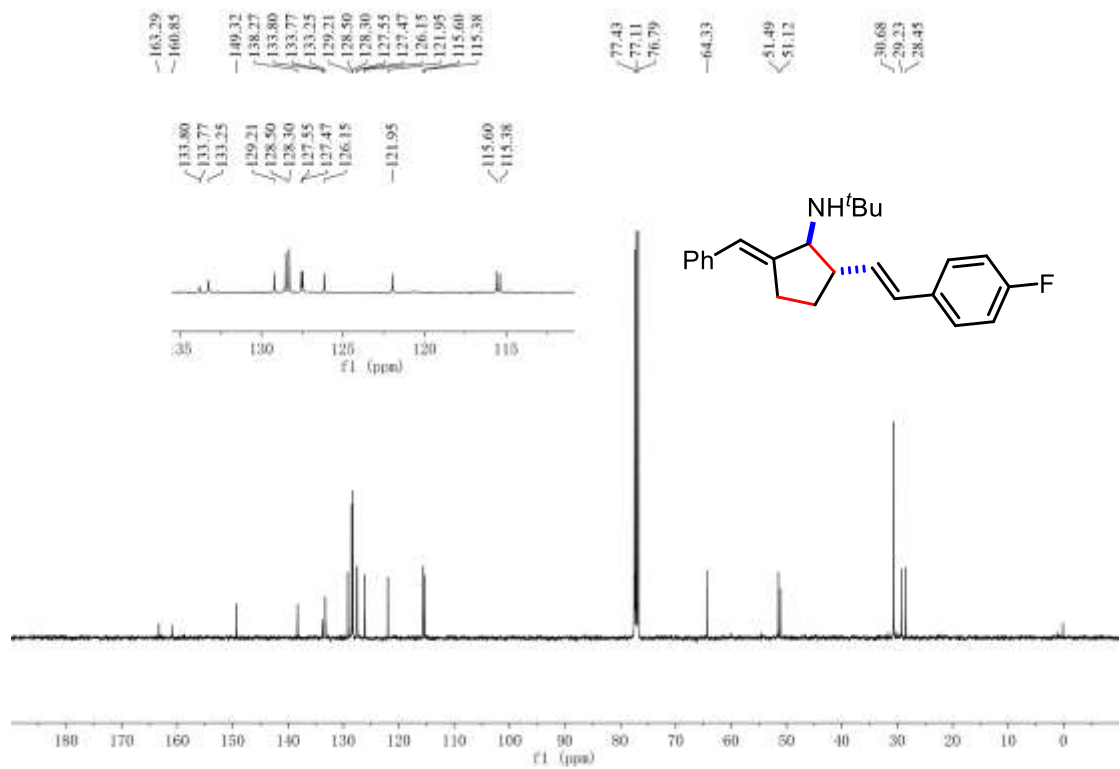

### $^1\text{H}$ NMR spectrum of *trans*-3ae (400 MHz, $\text{CDCl}_3$ )

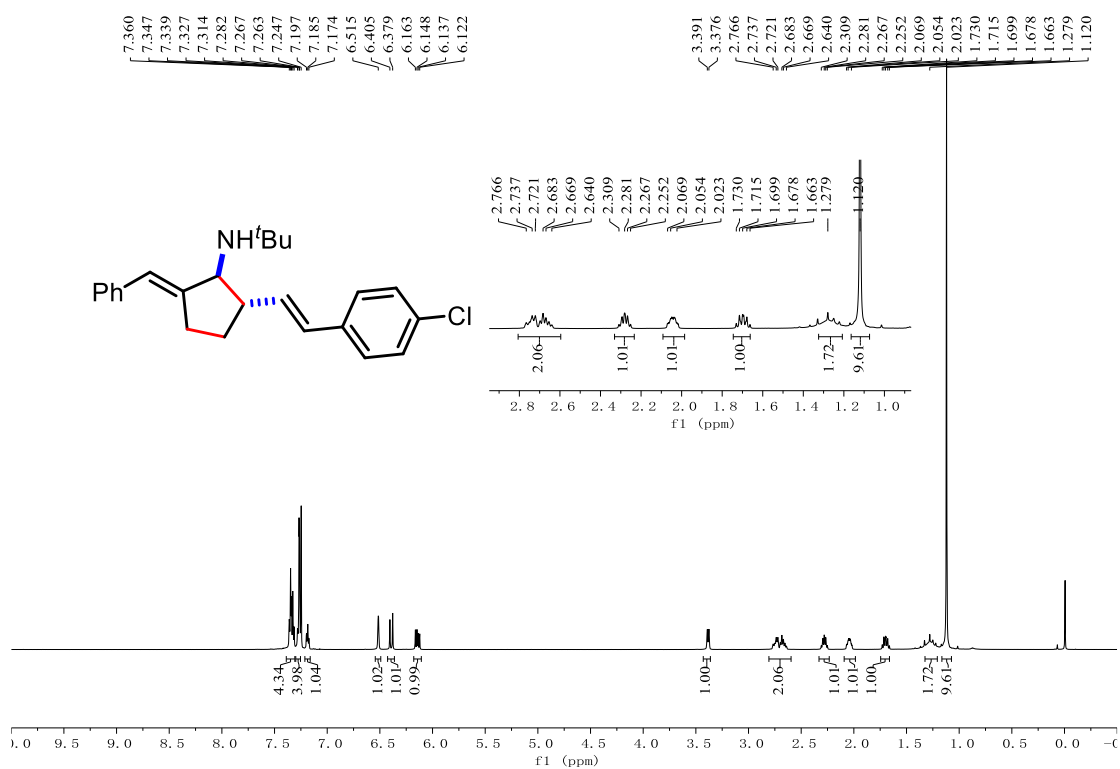

### $^{13}\text{C}$ NMR spectrum of *trans*-3ae (101 MHz, $\text{CDCl}_3$ )

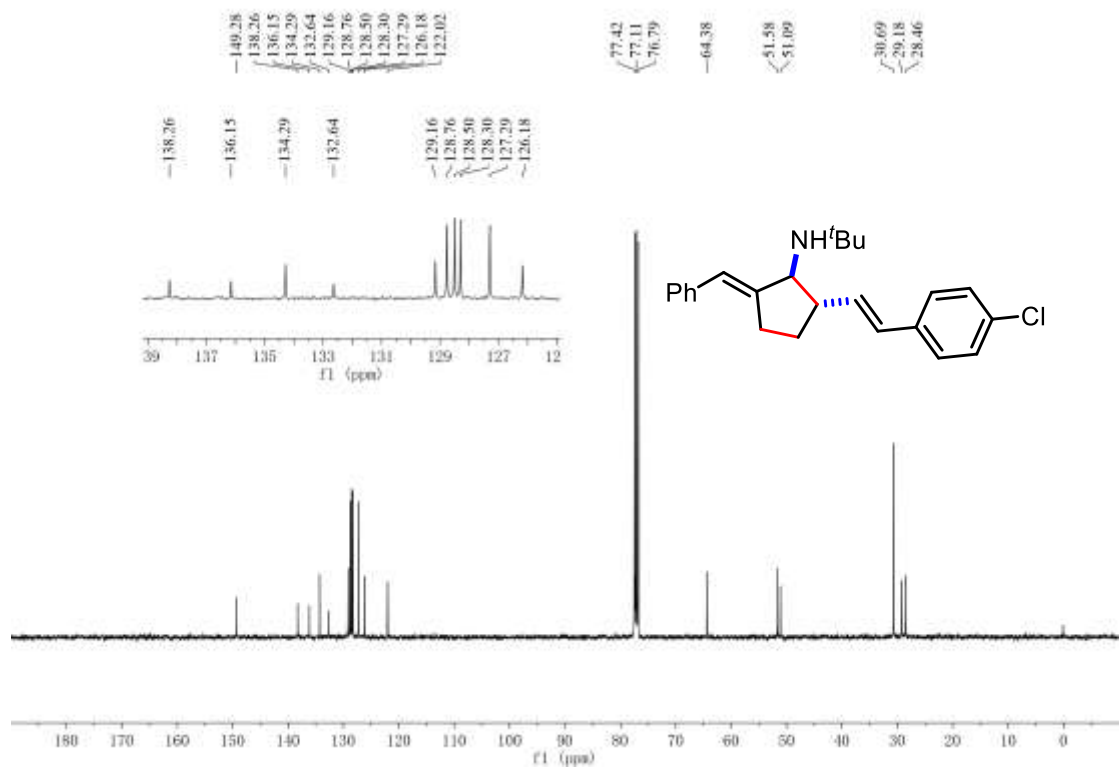

**<sup>1</sup>H NMR spectrum of *trans*-3af (600 MHz, CDCl<sub>3</sub>)**

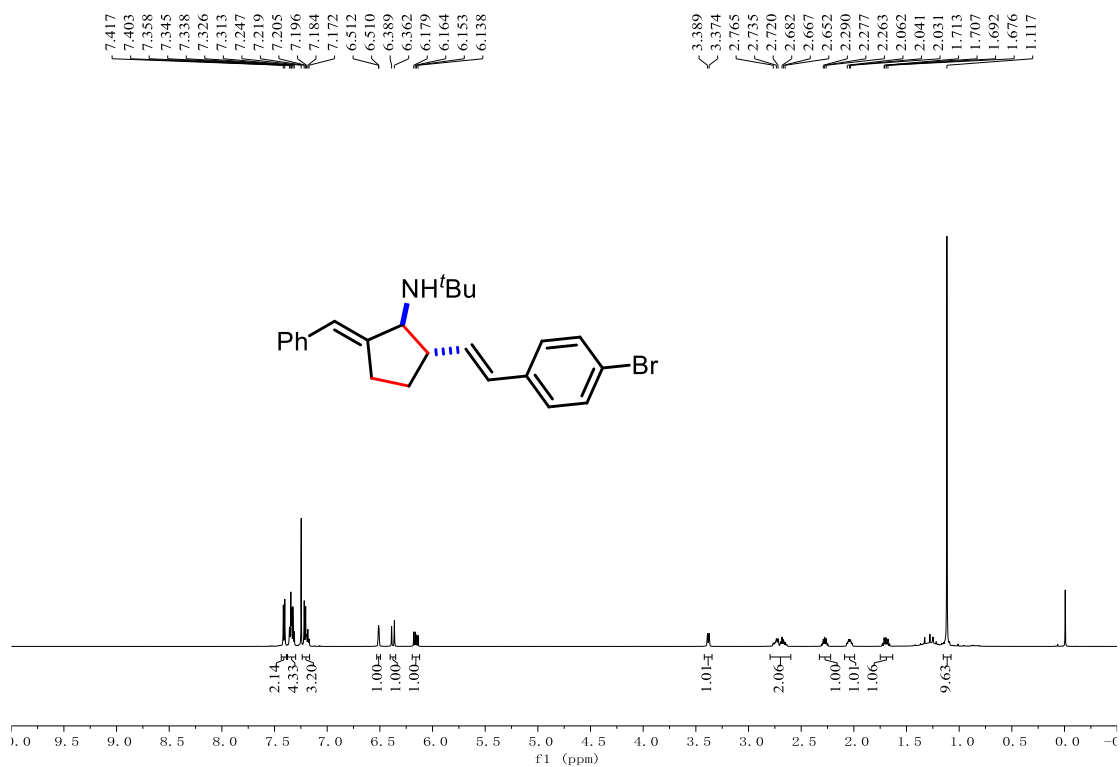

**<sup>13</sup>C NMR spectrum of *trans*-3af (101 MHz, CDCl<sub>3</sub>)**

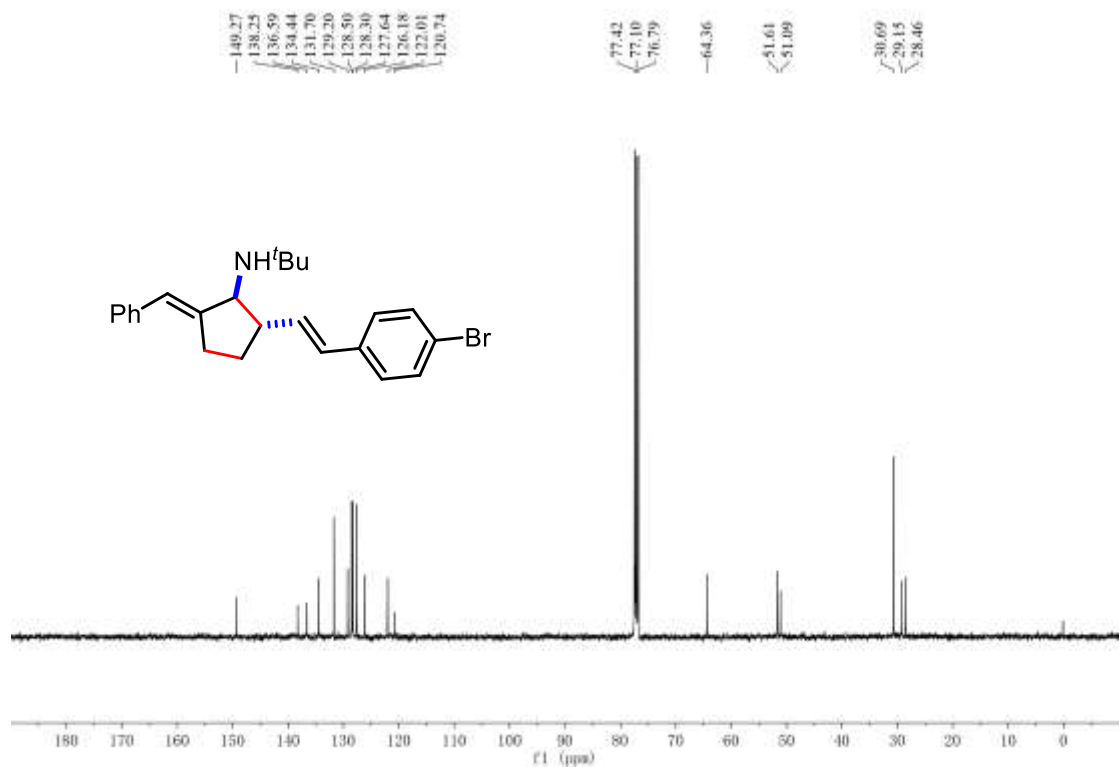

**<sup>1</sup>H NMR spectrum of *trans*-3ag (400 MHz, CDCl<sub>3</sub>)**

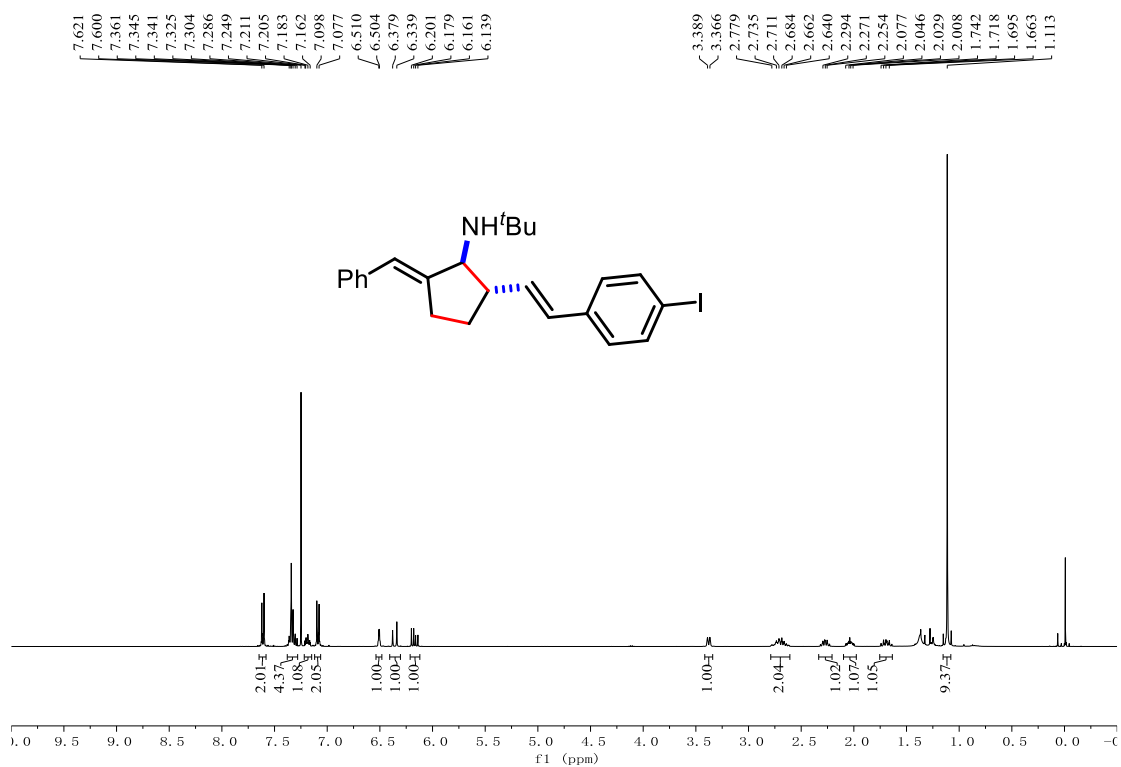

**<sup>13</sup>C NMR spectrum of *trans*-3ag (101 MHz, CDCl<sub>3</sub>)**

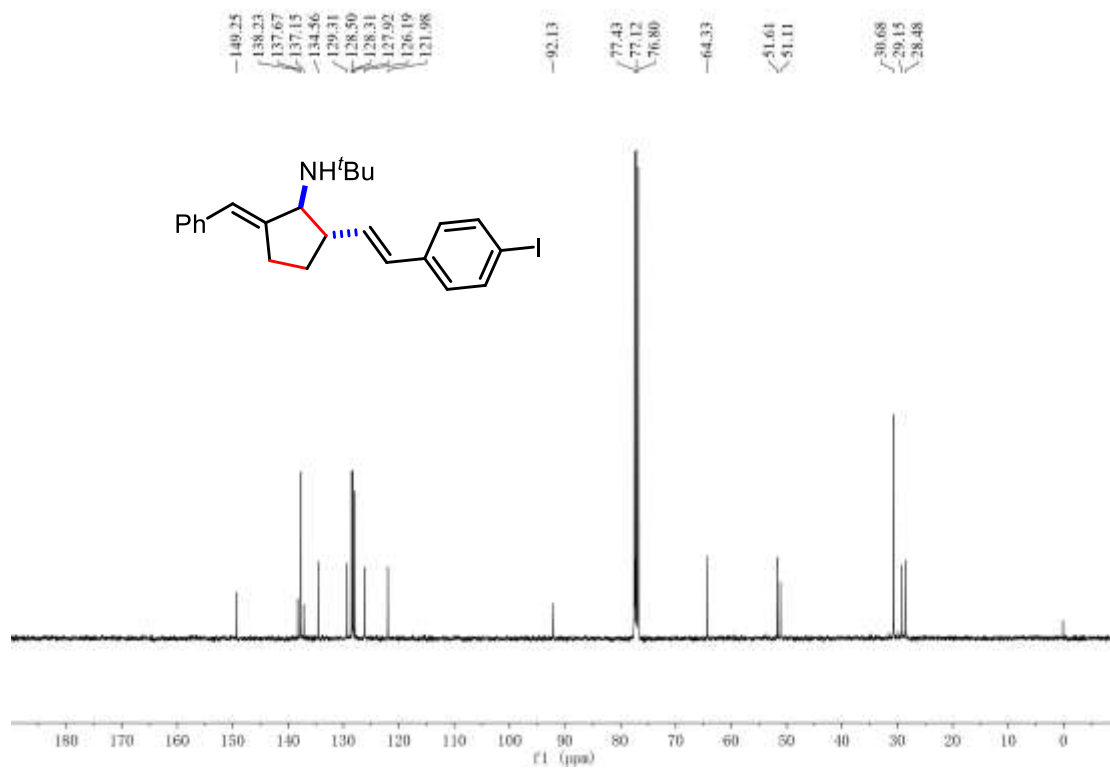

**<sup>1</sup>H NMR spectrum of *trans*-3ah (600 MHz, CDCl<sub>3</sub>)**

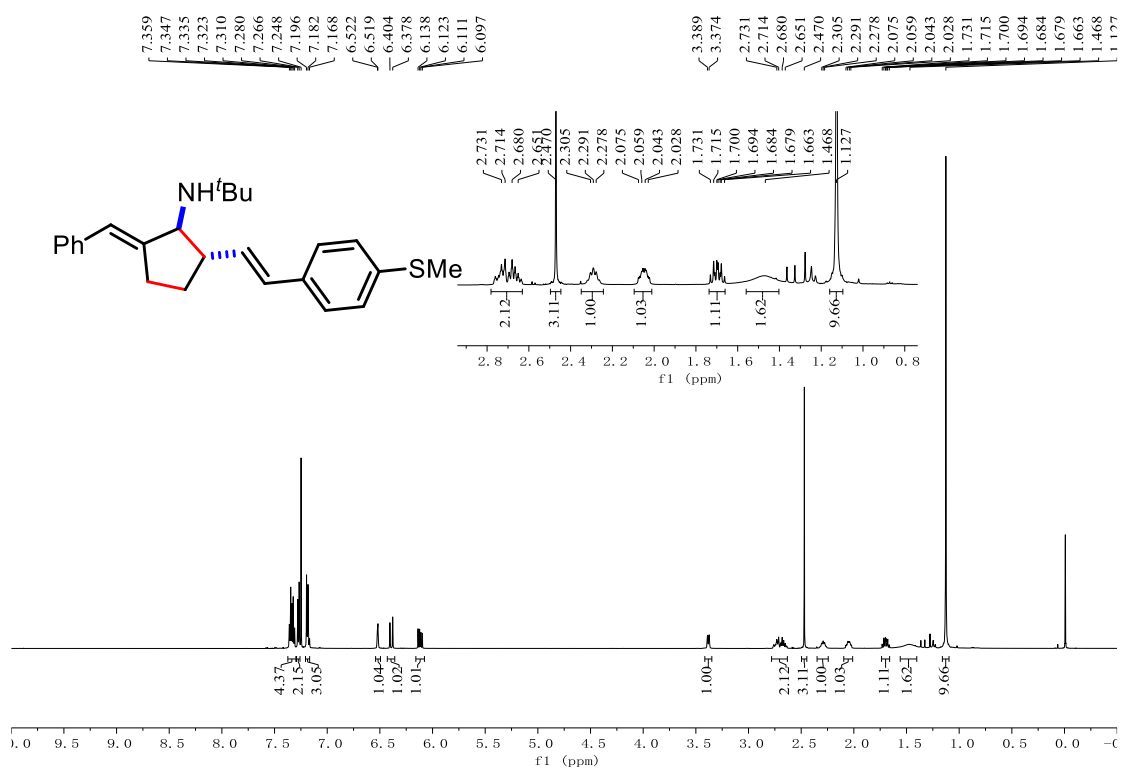

**<sup>13</sup>C NMR spectrum of *trans*-3ah (101 MHz, CDCl<sub>3</sub>)**

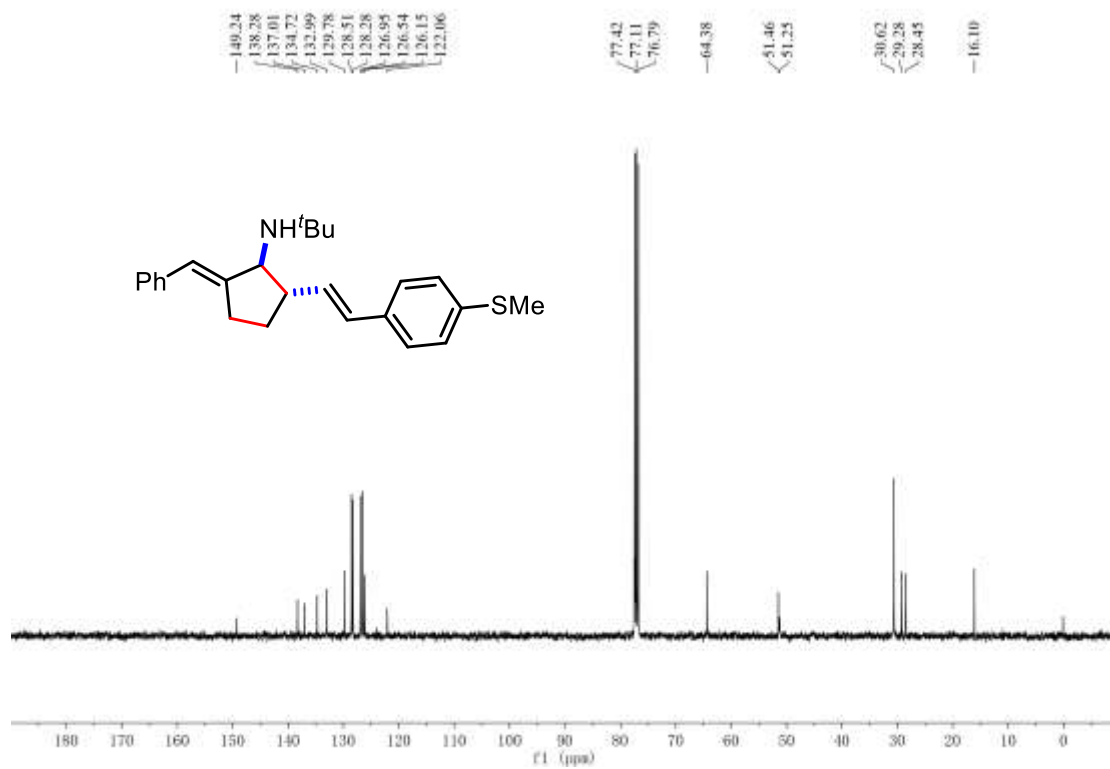

**<sup>1</sup>H NMR spectrum of *trans*-3ai (600 MHz, CDCl<sub>3</sub>)**

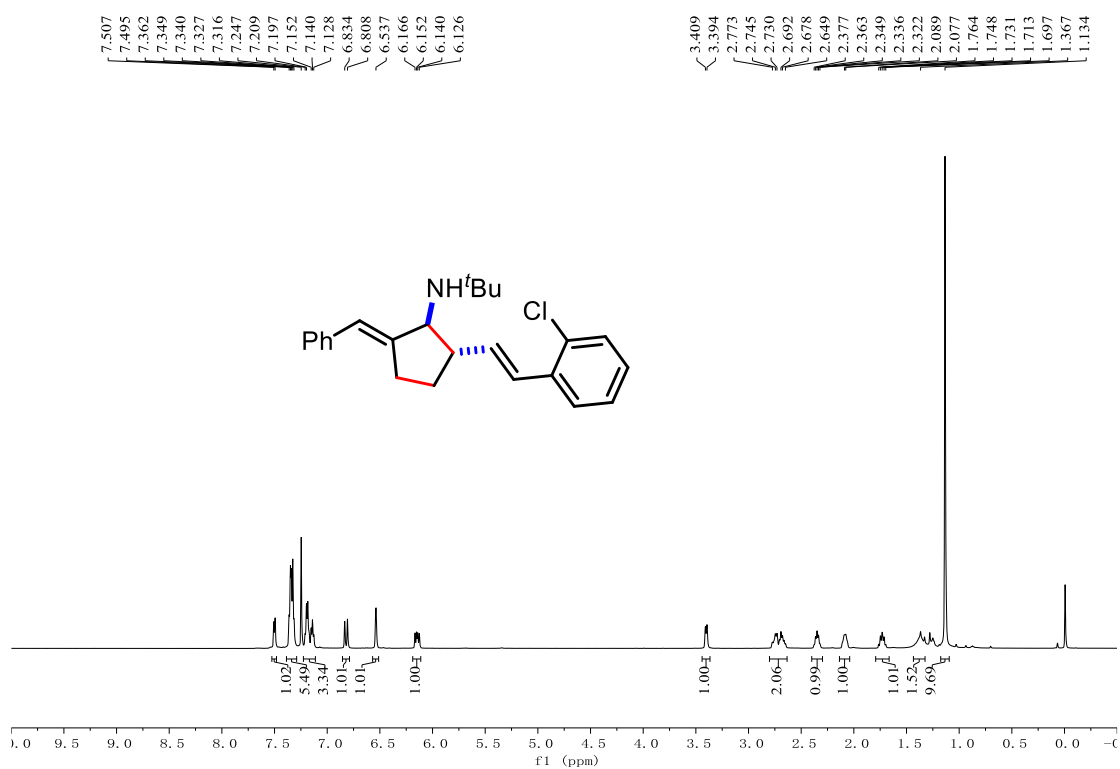

**<sup>13</sup>C NMR spectrum of *trans*-3ai (101 MHz, CDCl<sub>3</sub>)**

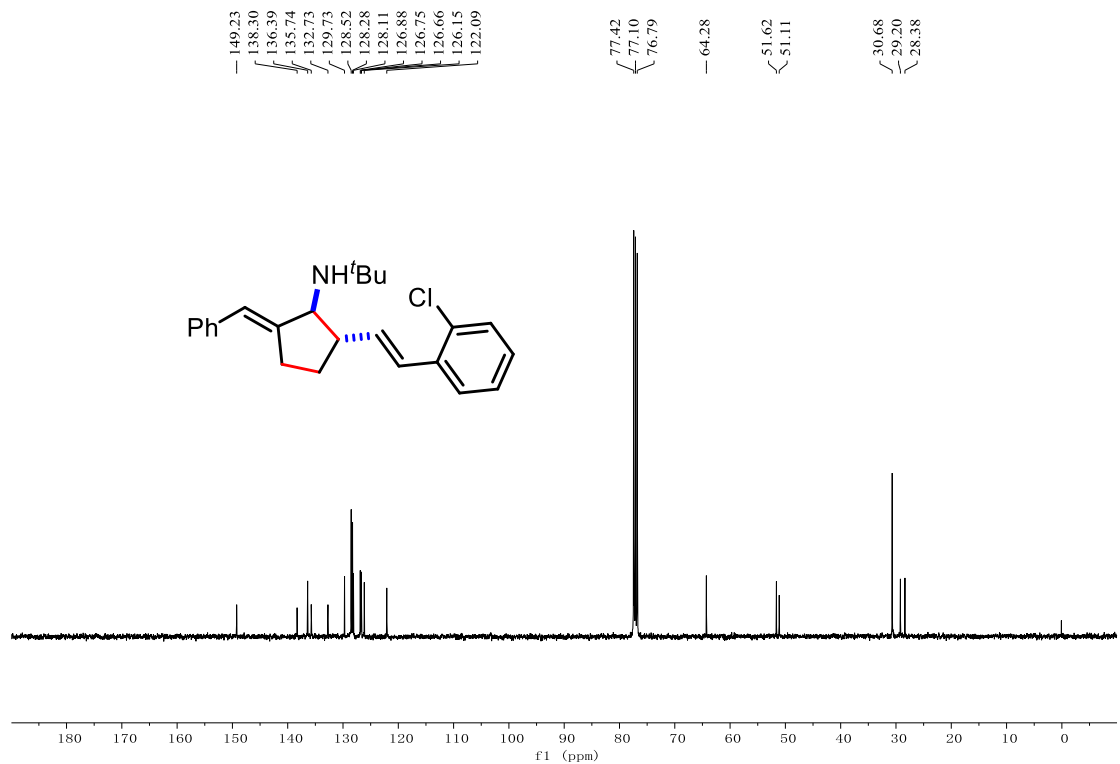

**<sup>1</sup>H NMR spectrum of *trans*-3aj (600 MHz, CDCl<sub>3</sub>)**

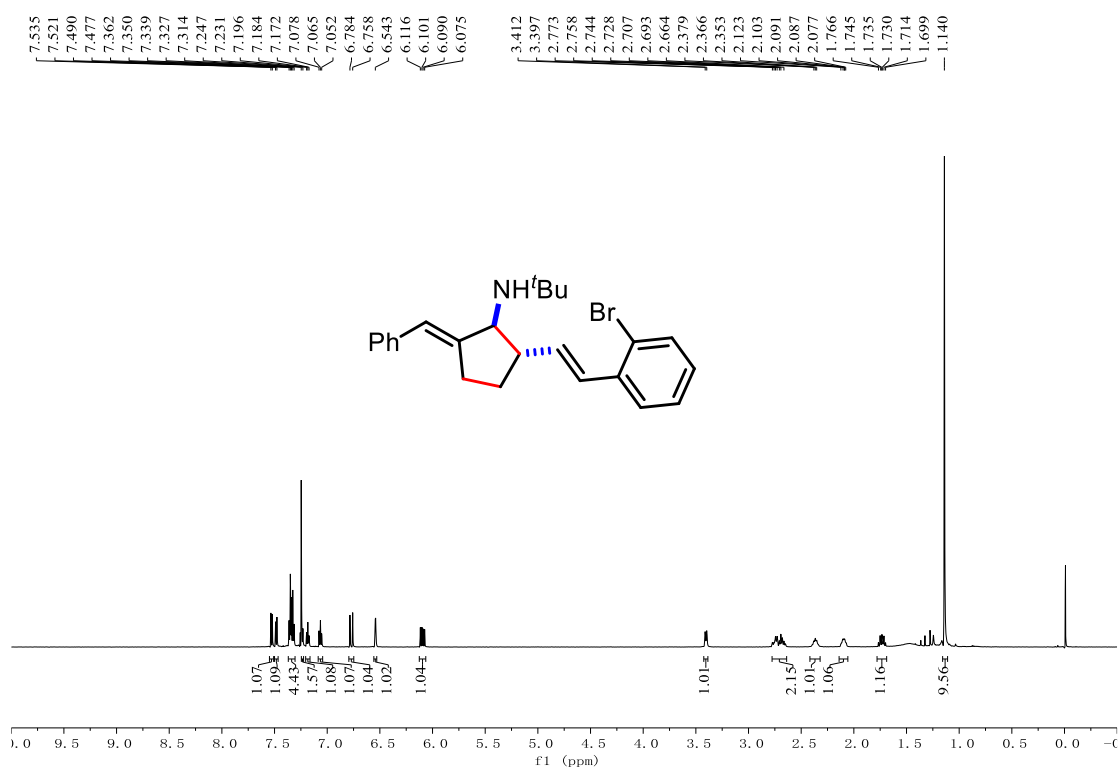

**<sup>13</sup>C NMR spectrum of *trans*-3aj (101 MHz, CDCl<sub>3</sub>)**

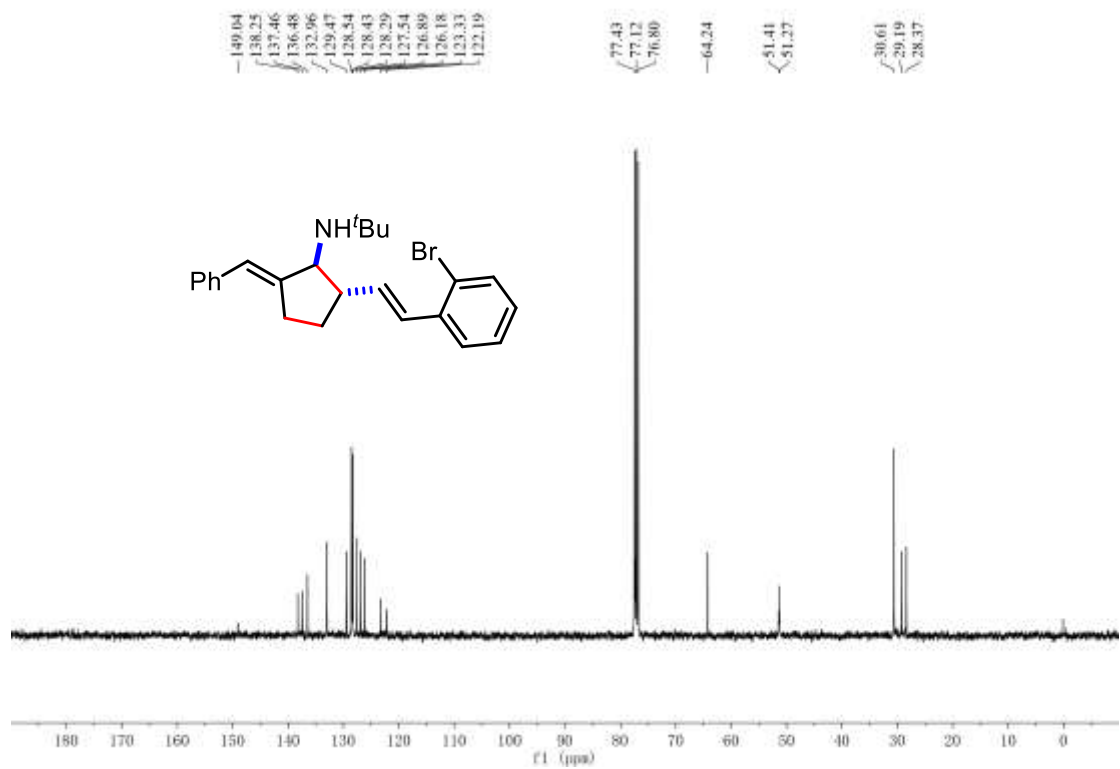

**$^1\text{H}$  NMR spectrum of *trans*-3ak (600 MHz,  $\text{CDCl}_3$ )**

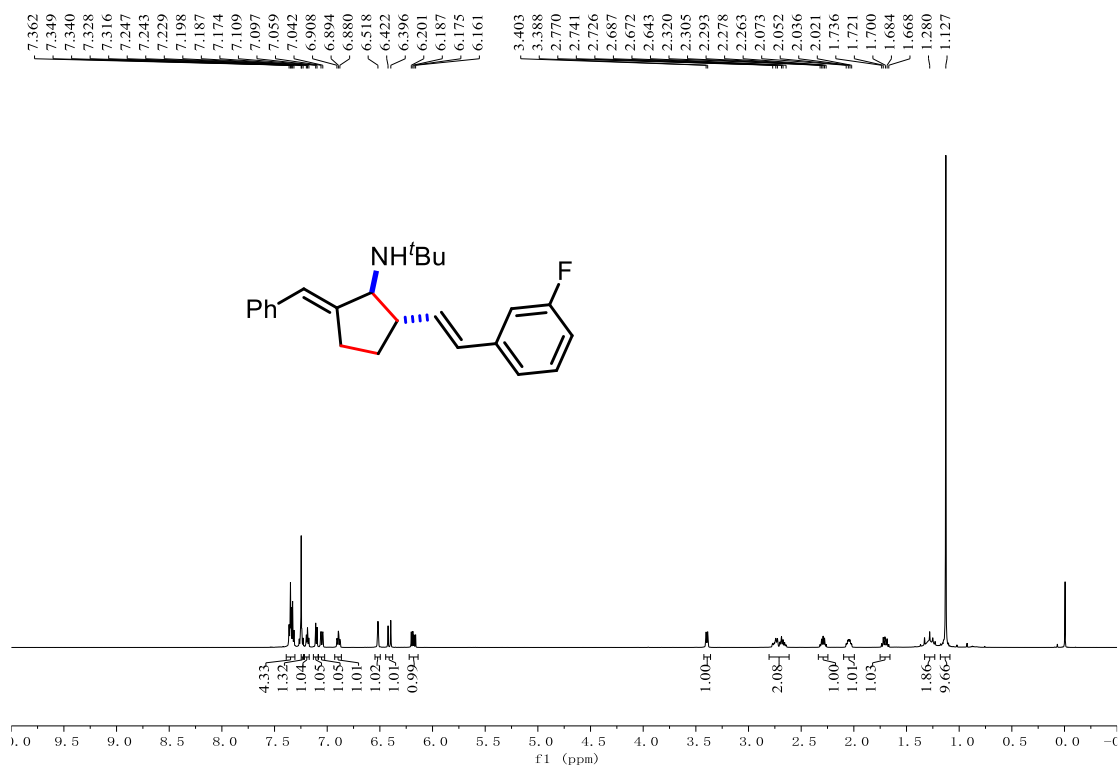

**$^{13}\text{C}$  NMR spectrum of *trans*-3ak (101 MHz,  $\text{CDCl}_3$ )**

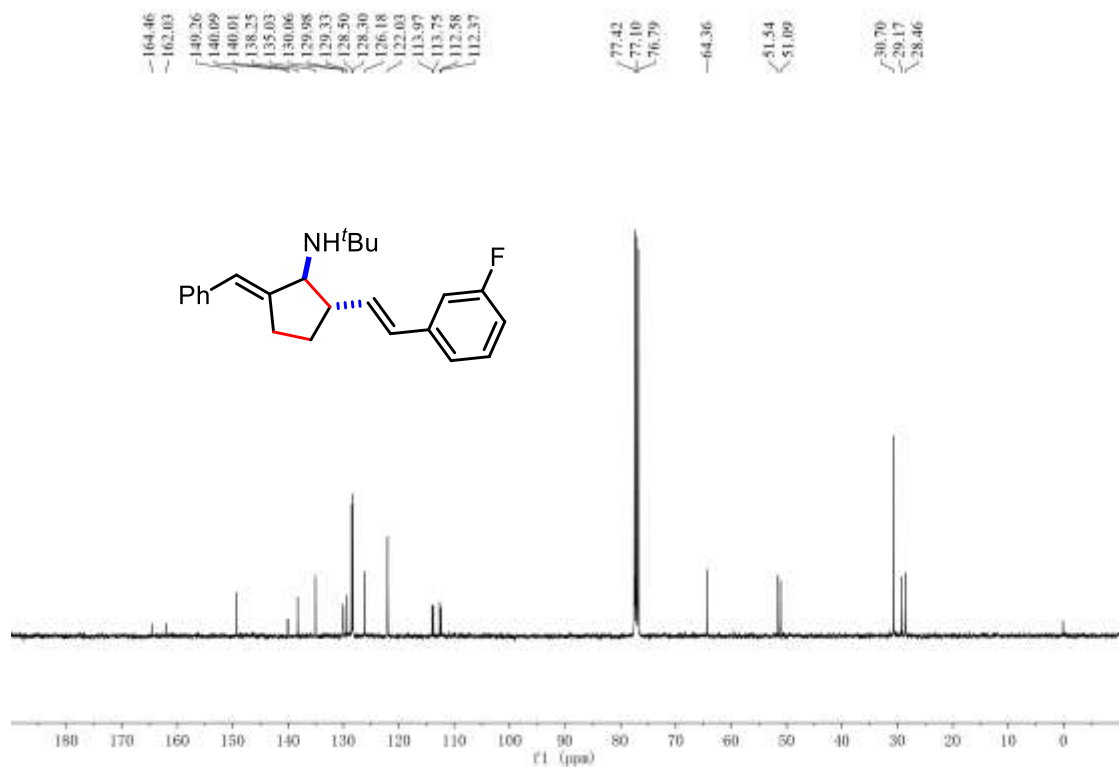

**<sup>1</sup>H NMR spectrum of *trans*-3al (600 MHz, CDCl<sub>3</sub>)**

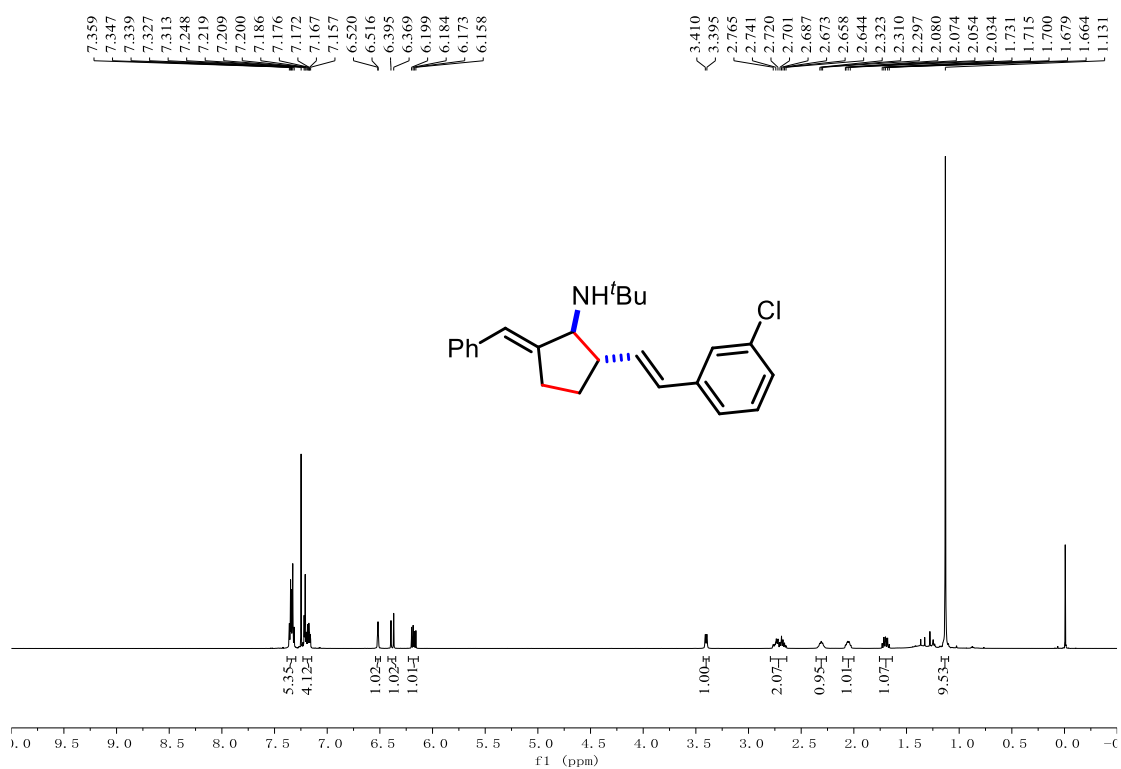

**<sup>13</sup>C NMR spectrum of *trans*-3al (101 MHz, CDCl<sub>3</sub>)**

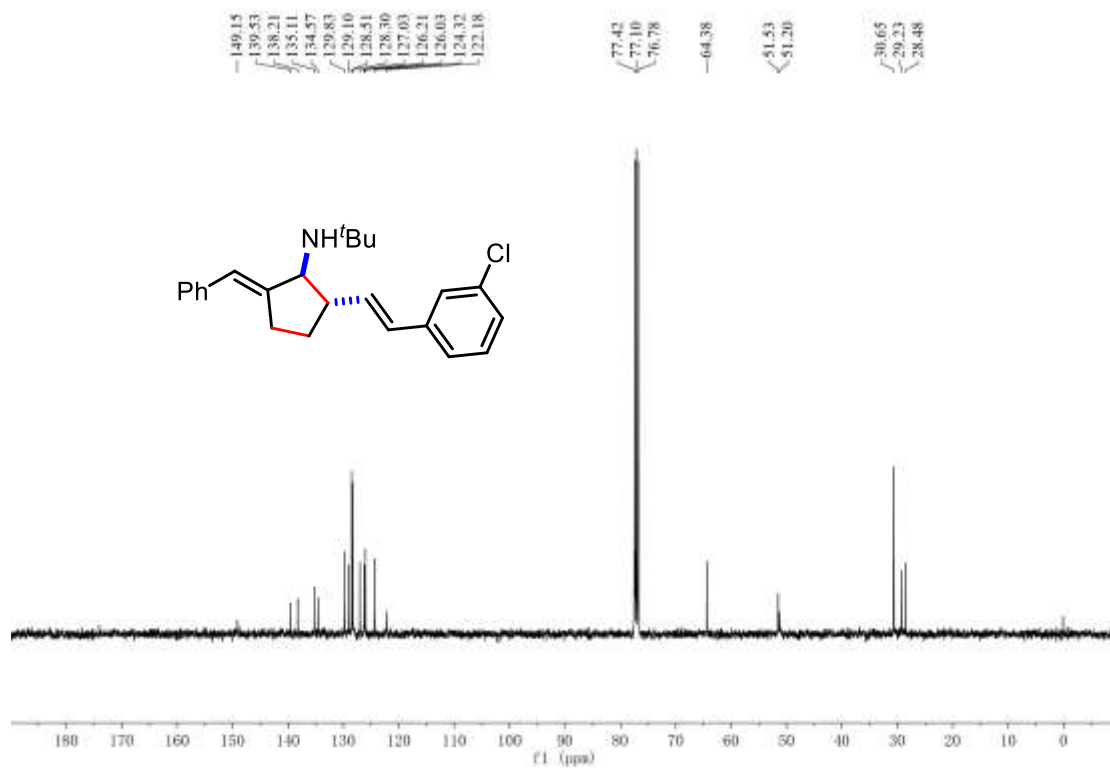

**<sup>1</sup>H NMR spectrum of *trans*-3am (600 MHz, CDCl<sub>3</sub>)**

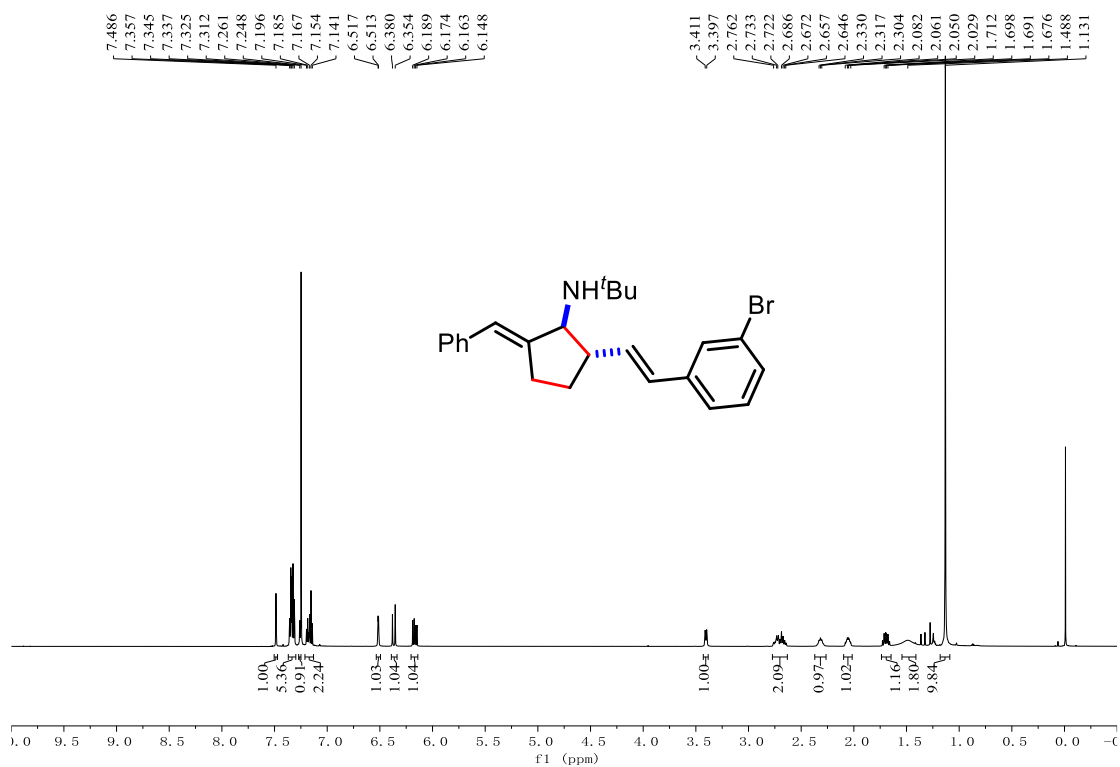

**<sup>13</sup>C NMR spectrum of *trans*-3am (101 MHz, CDCl<sub>3</sub>)**

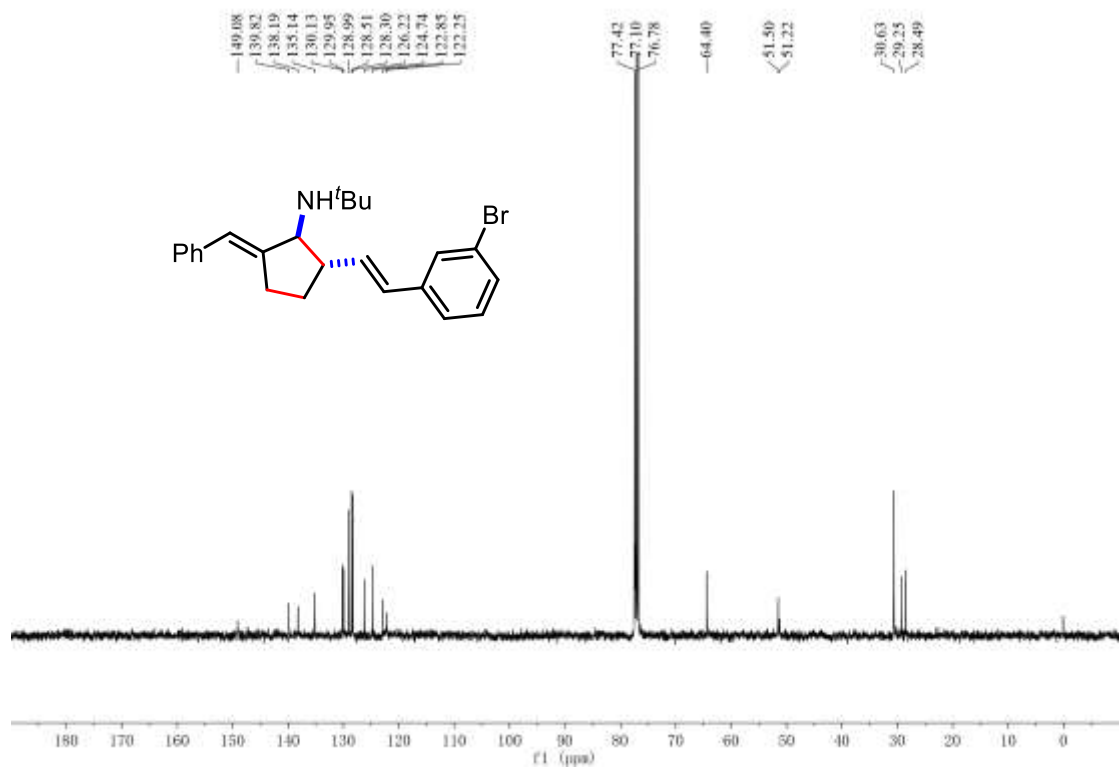

**<sup>1</sup>H NMR spectrum of *trans*-3an (400 MHz, CDCl<sub>3</sub>)**

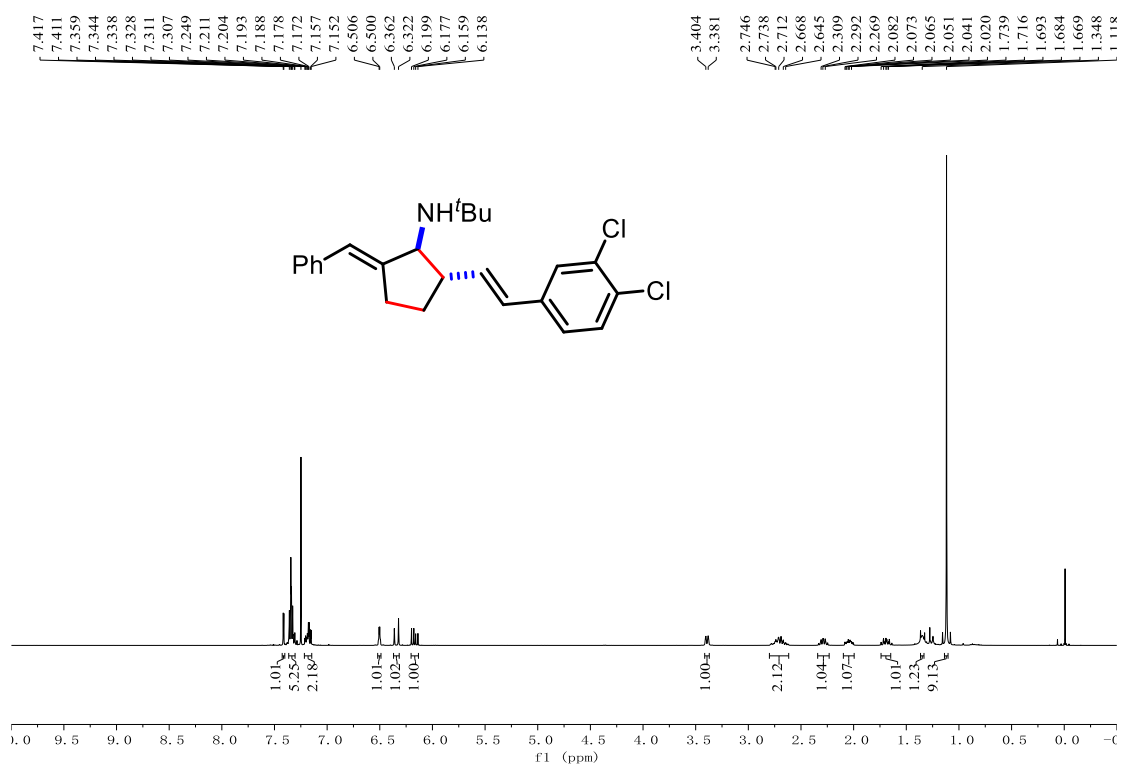

**<sup>13</sup>C NMR spectrum of *trans*-3an (101 MHz, CDCl<sub>3</sub>)**

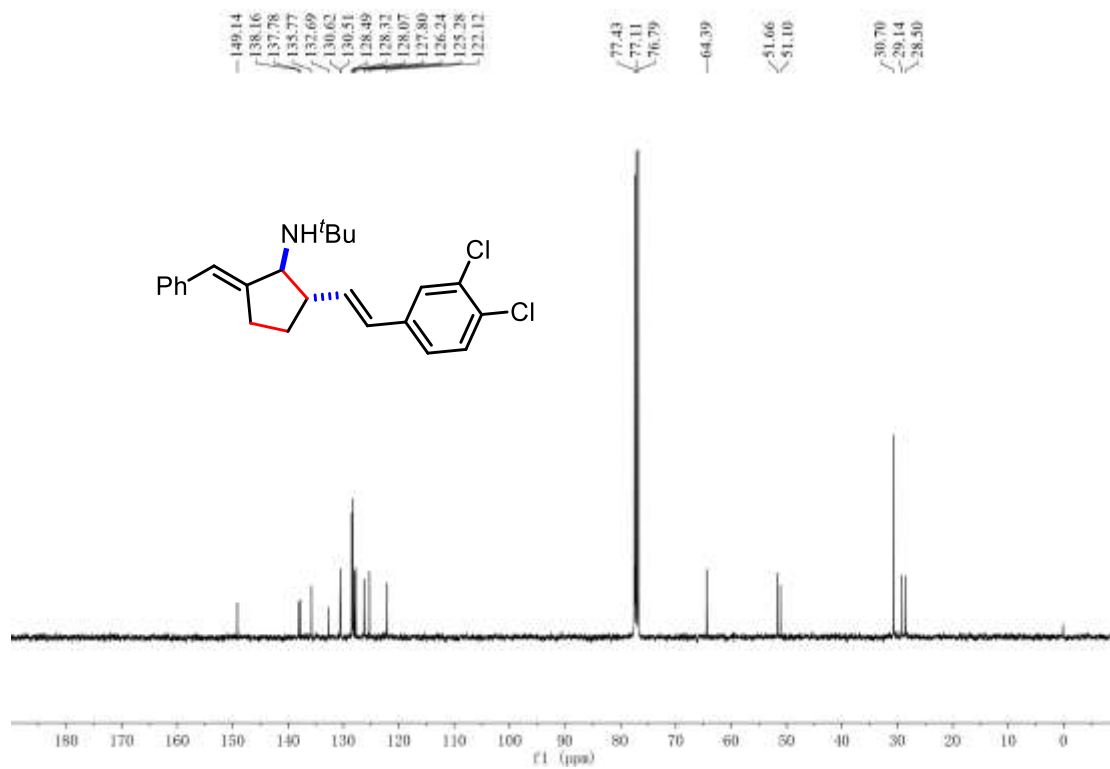

**<sup>1</sup>H NMR spectrum of *trans*-3ao (600 MHz, CDCl<sub>3</sub>)**

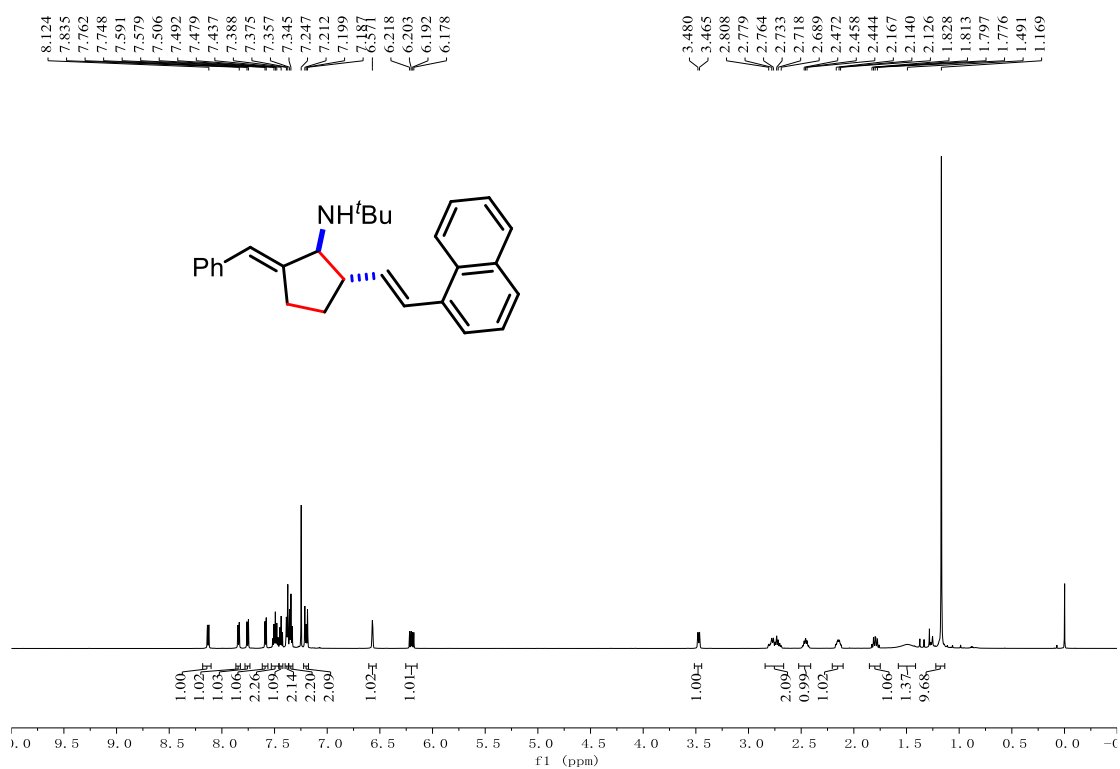

**<sup>13</sup>C NMR spectrum of *trans*-3ao (101 MHz, CDCl<sub>3</sub>)**

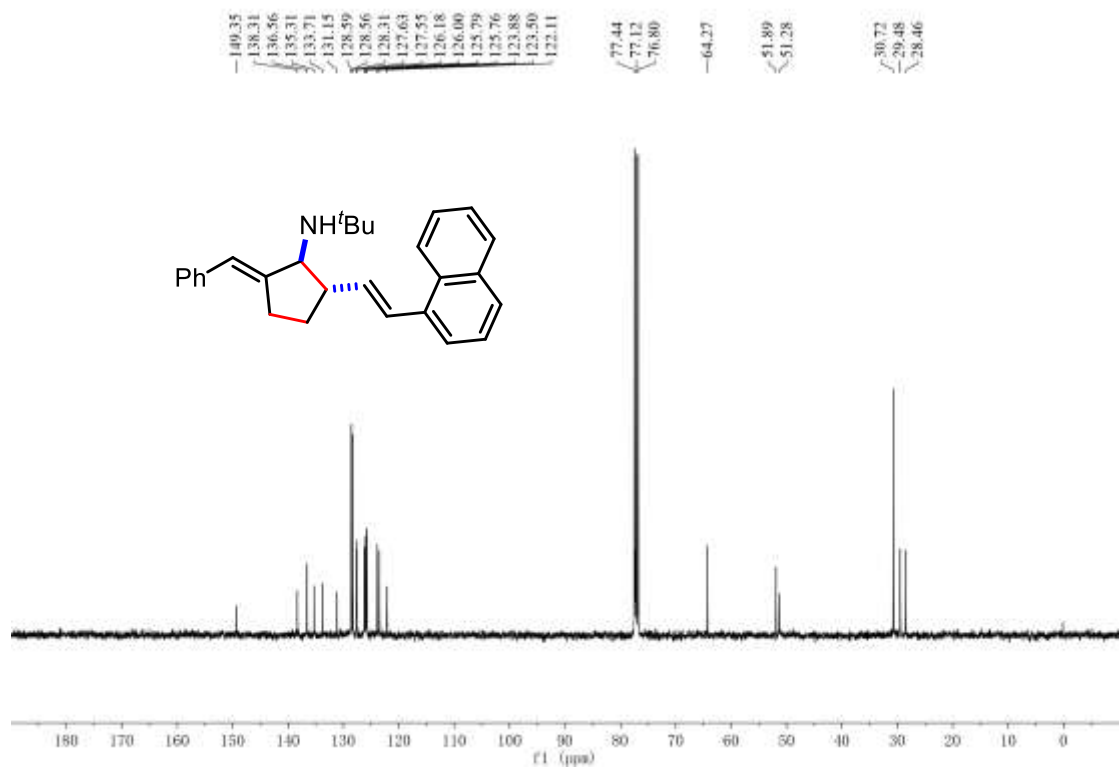

**$^1\text{H}$  NMR spectrum of *trans*-3ap (600 MHz,  $\text{CDCl}_3$ )**

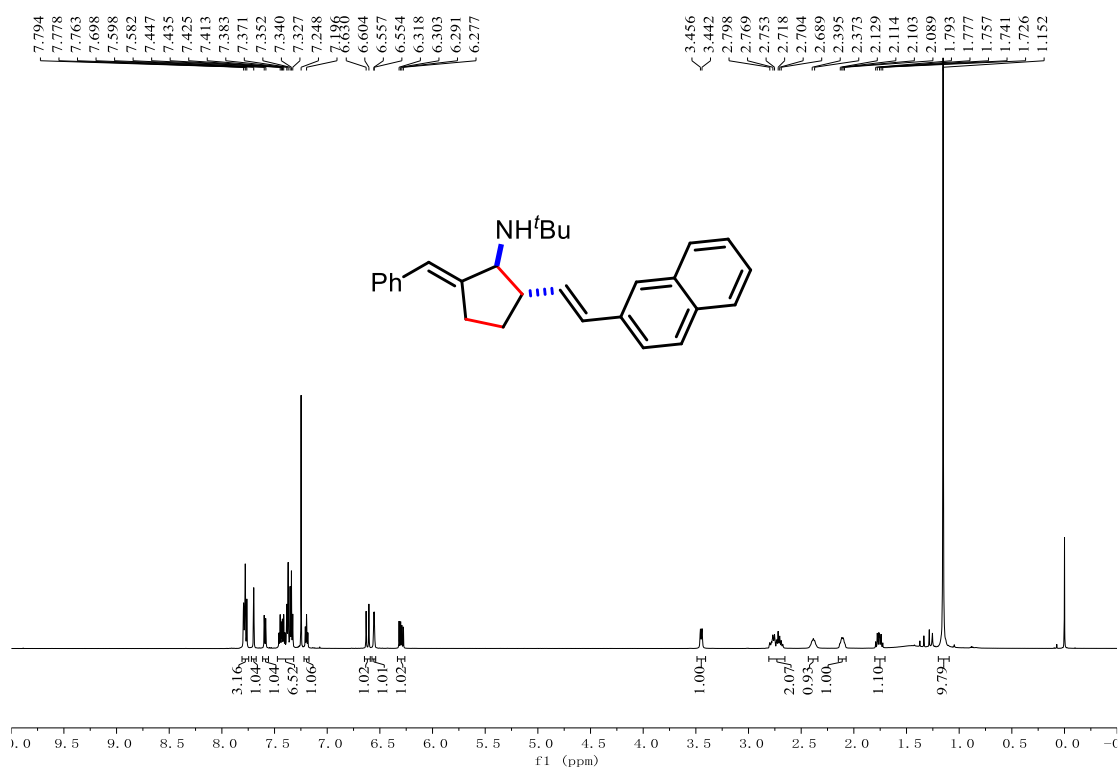

**$^{13}\text{C}$  NMR spectrum of *trans*-3ap (101 MHz,  $\text{CDCl}_3$ )**

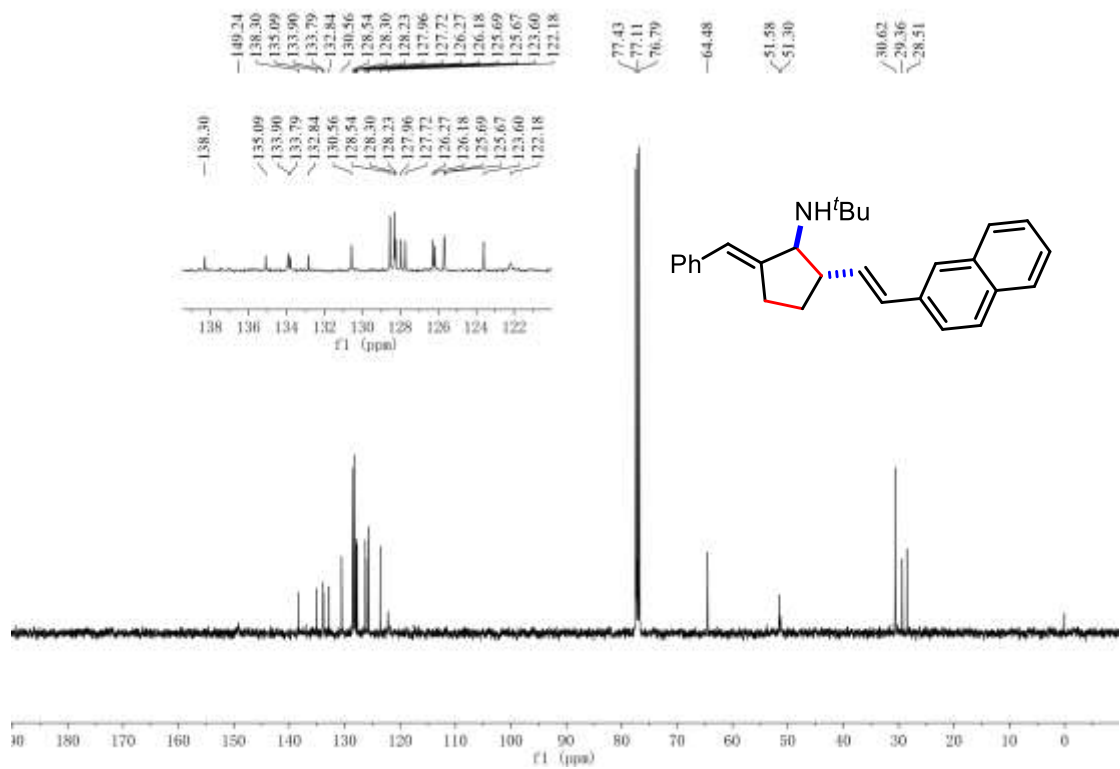

**$^1\text{H}$  NMR spectrum of *trans*-3aq (600 MHz,  $\text{CDCl}_3$ )**

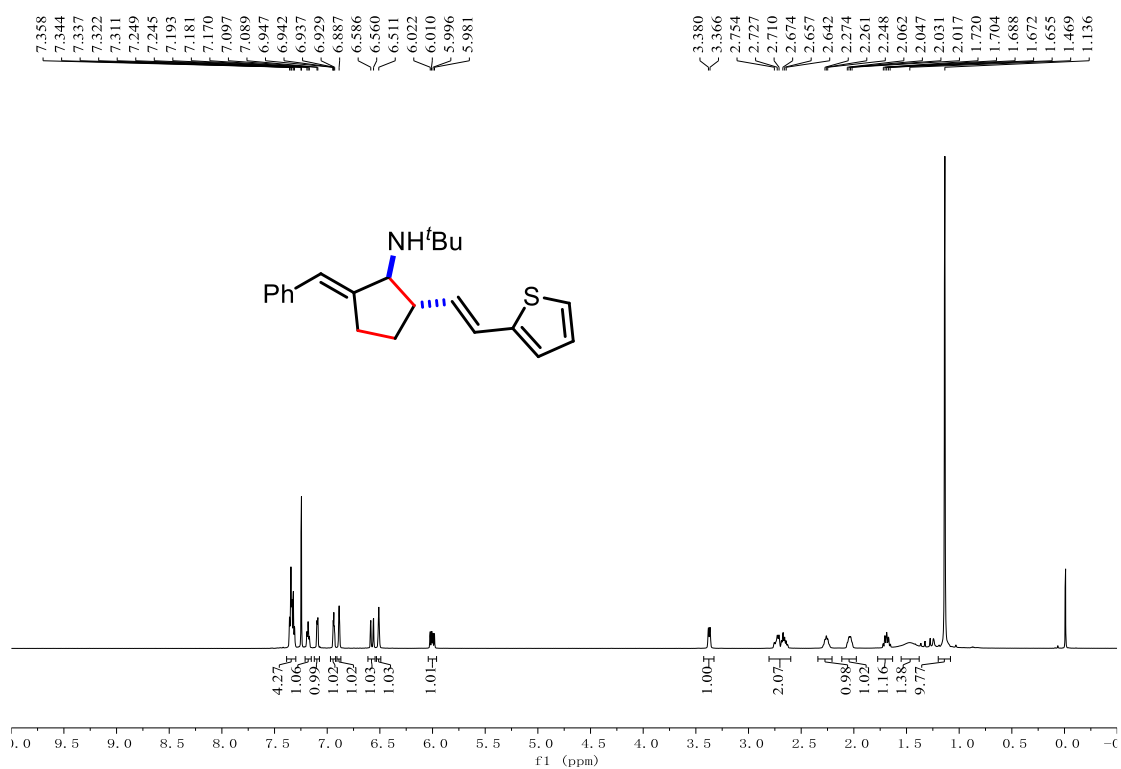

**$^{13}\text{C}$  NMR spectrum of *trans*-3aq (101 MHz,  $\text{CDCl}_3$ )**

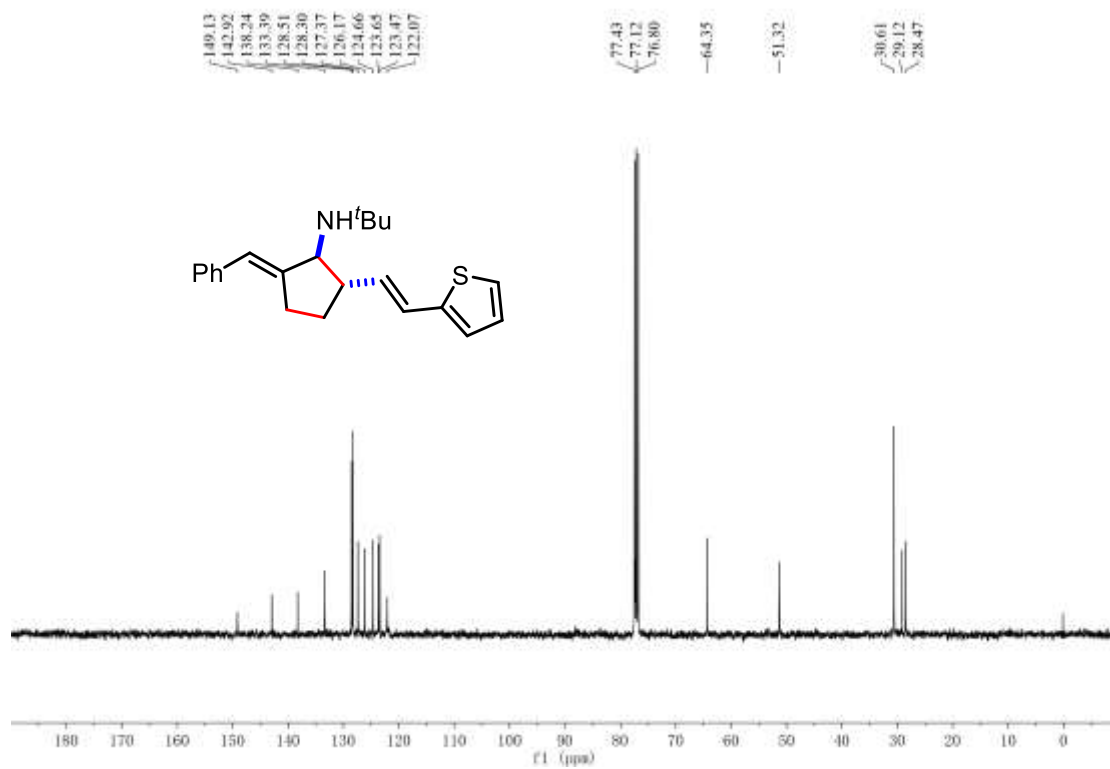

**<sup>1</sup>H NMR spectrum of *trans*-3ar (600 MHz, CDCl<sub>3</sub>)**

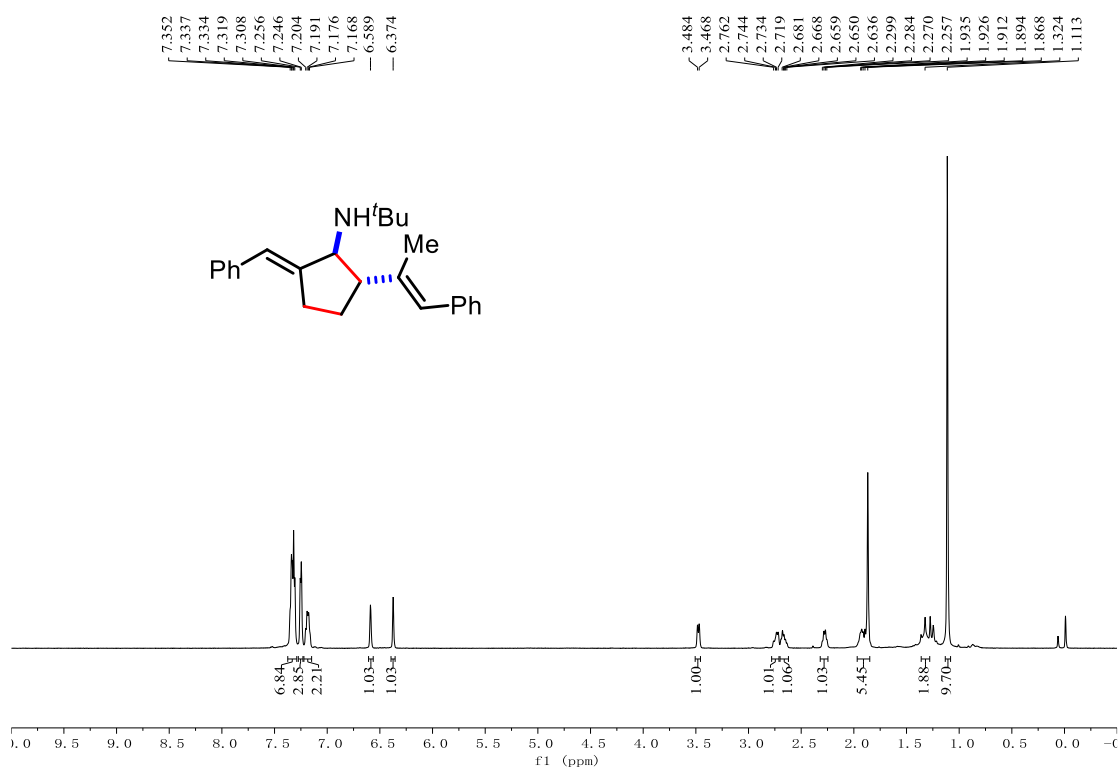

**<sup>13</sup>C NMR spectrum of *trans*-3ar (101 MHz, CDCl<sub>3</sub>)**

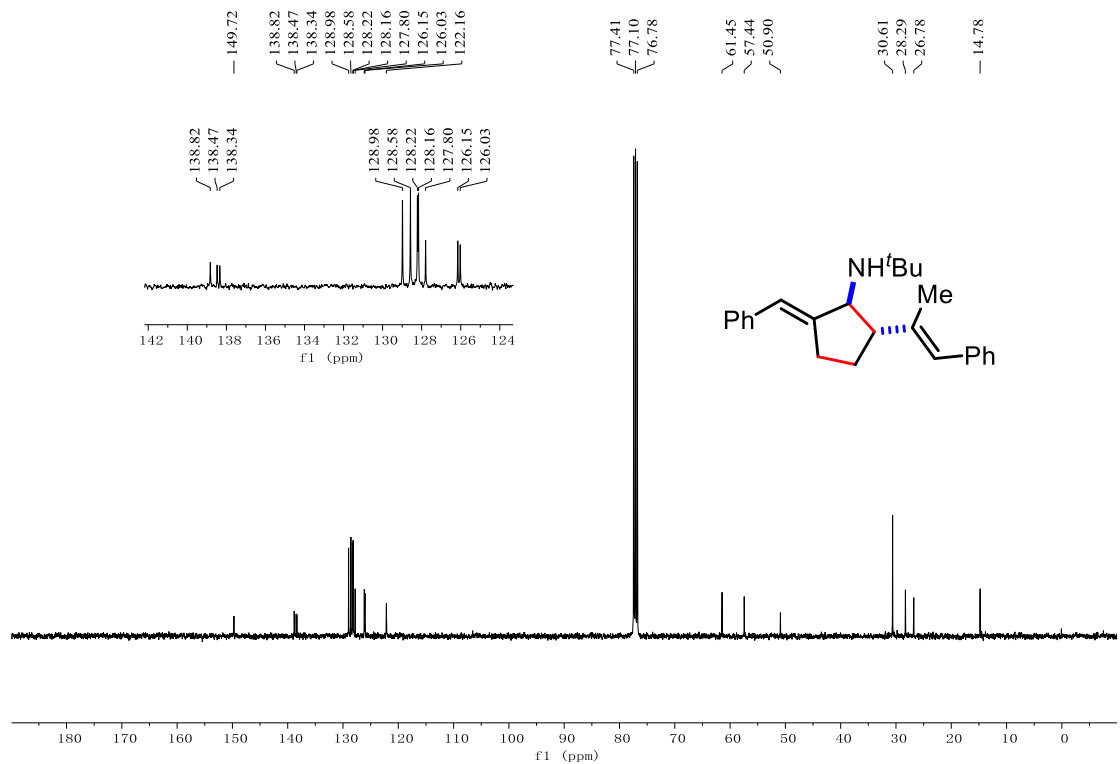

**<sup>1</sup>H NMR spectrum of *trans*-3as (400 MHz, CDCl<sub>3</sub>)**

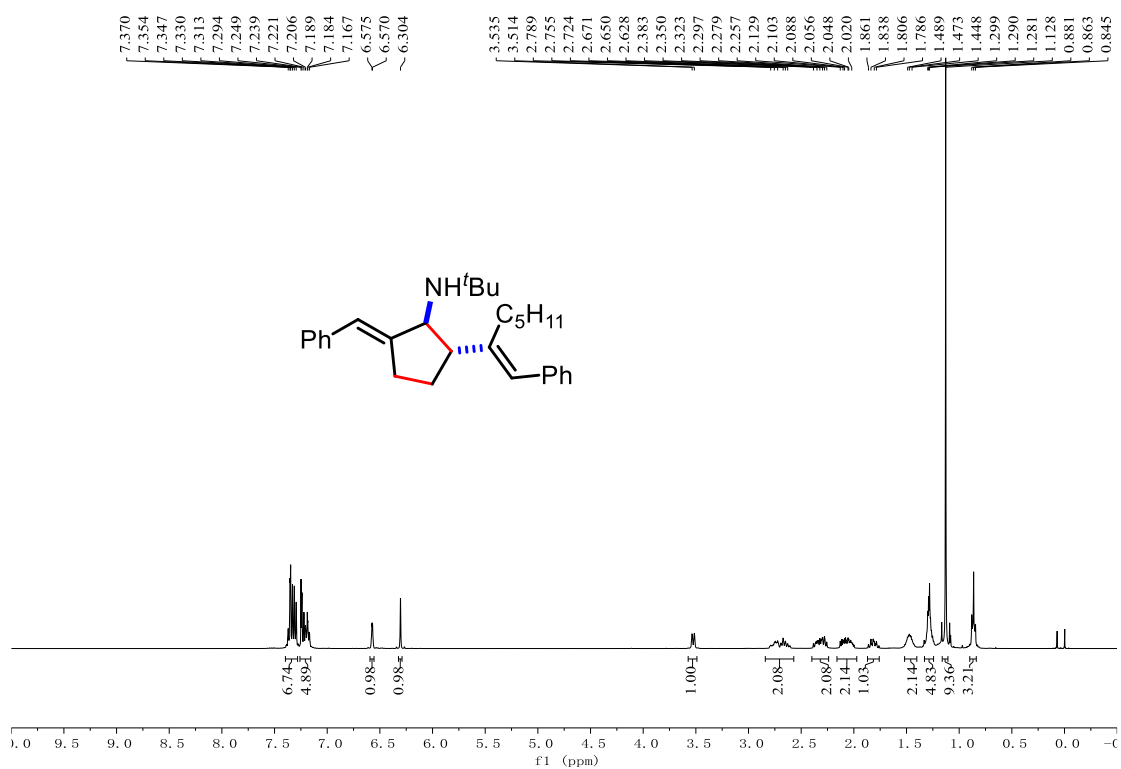

**<sup>13</sup>C NMR spectrum of *trans*-3as (101 MHz, CDCl<sub>3</sub>)**

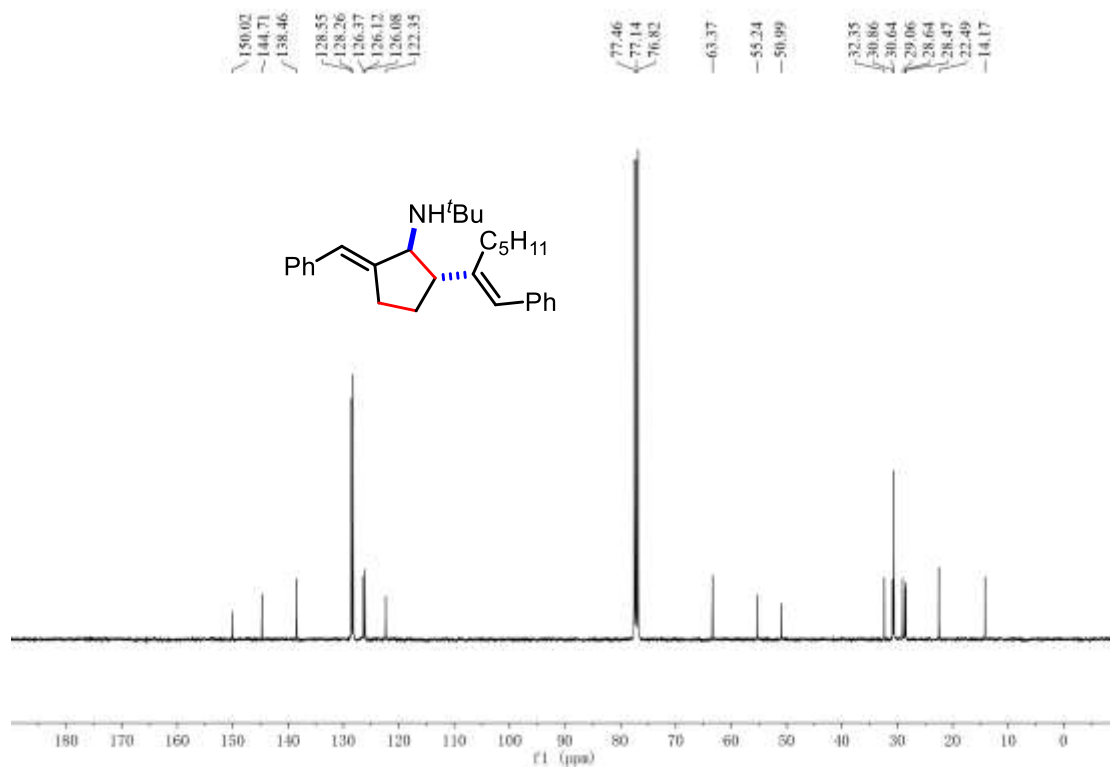

**<sup>1</sup>H NMR spectrum of *trans*-3av (400 MHz, CDCl<sub>3</sub>)**

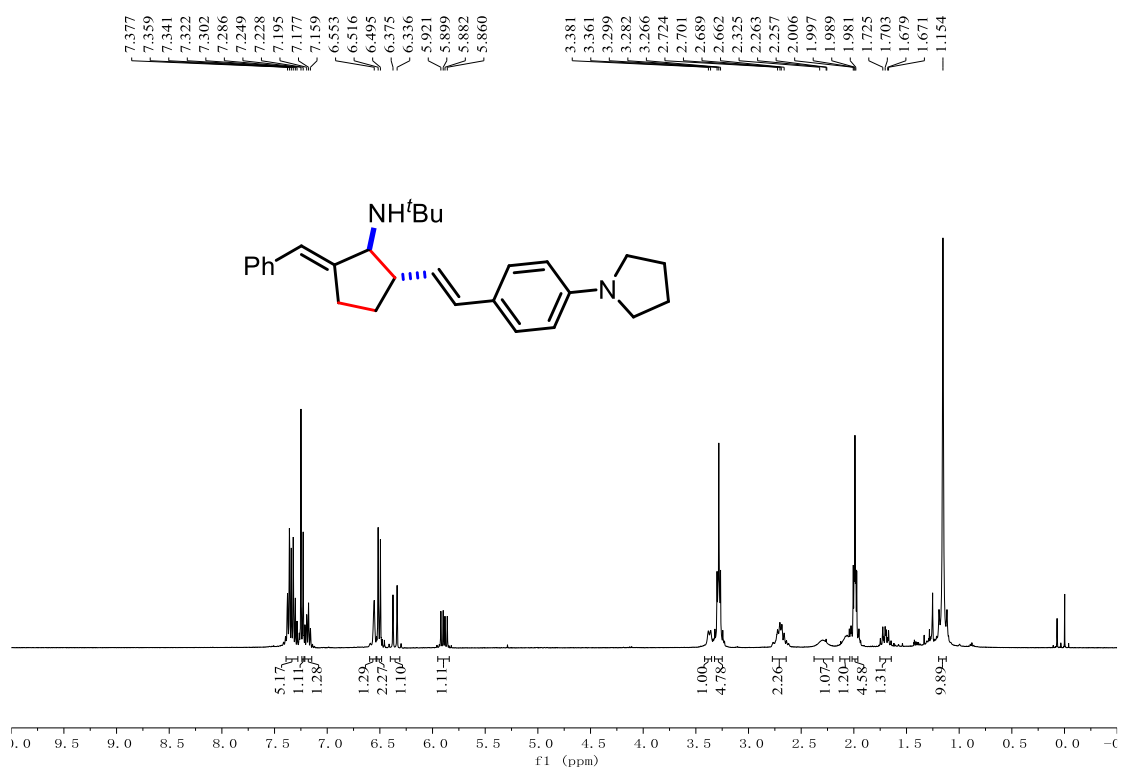

**<sup>13</sup>C NMR spectrum of *trans*-3av (101 MHz, CDCl<sub>3</sub>)**

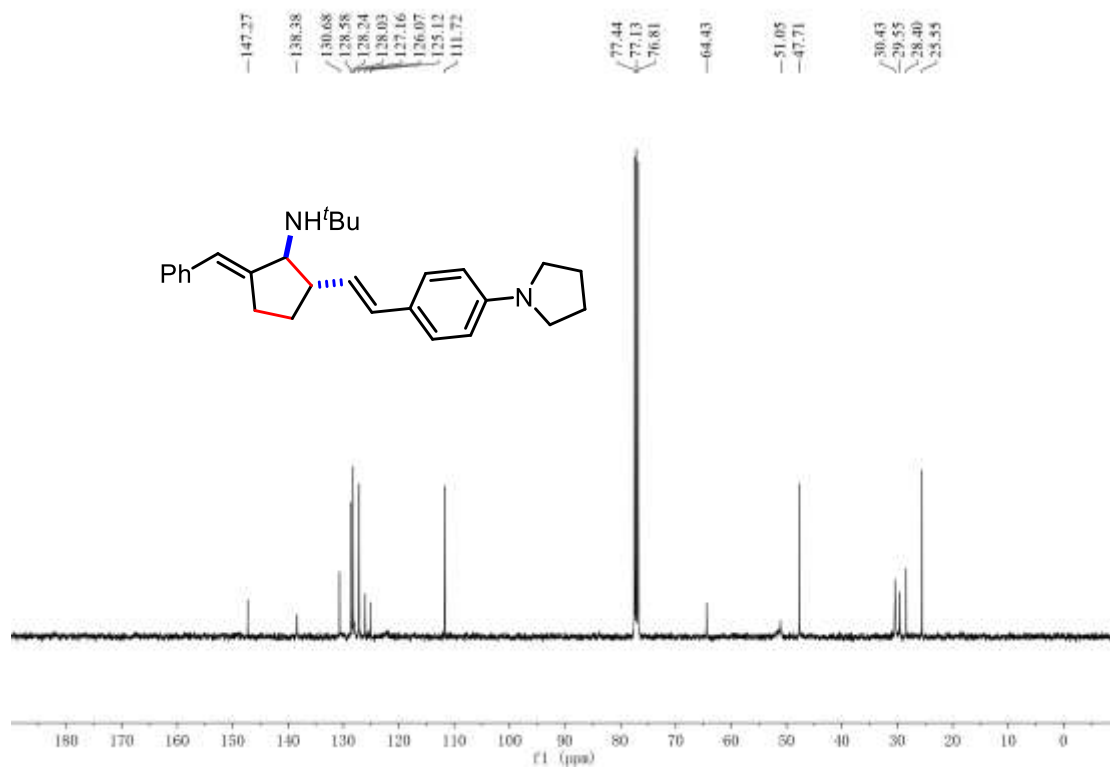

**<sup>1</sup>H NMR spectrum of *trans*-3av' (600 MHz, CDCl<sub>3</sub>)**

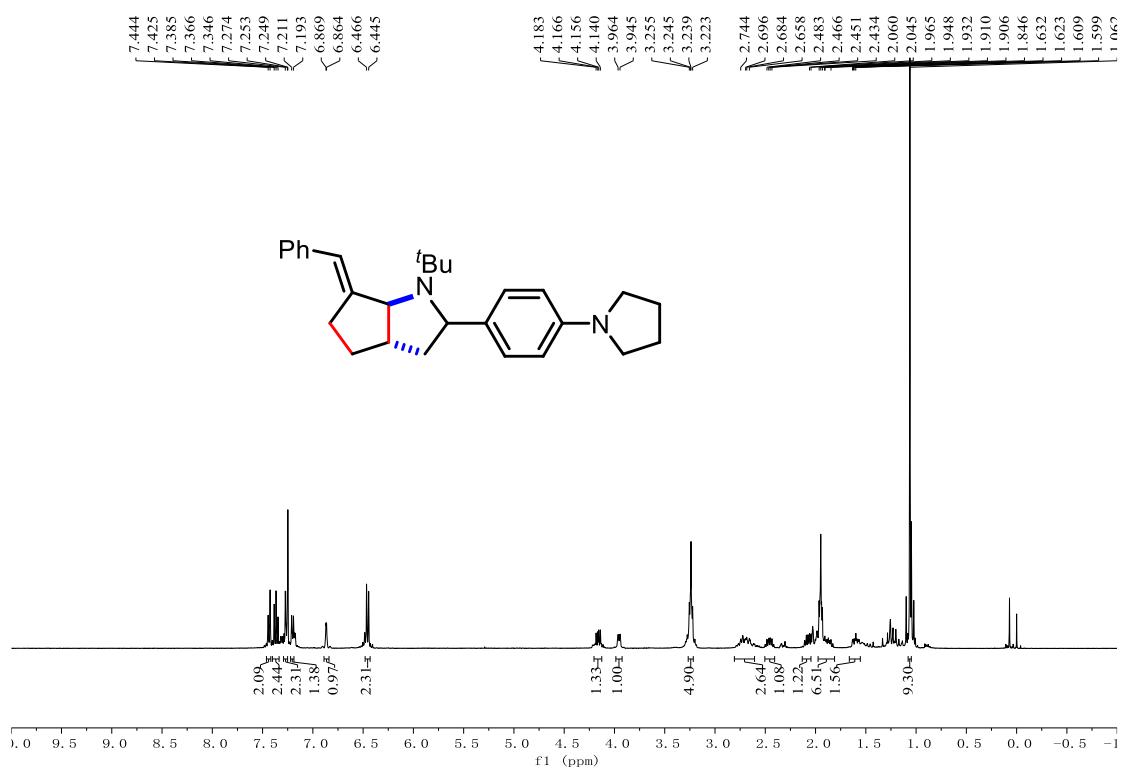

**<sup>13</sup>C NMR spectrum of *trans*-3av' (101 MHz, CDCl<sub>3</sub>)**

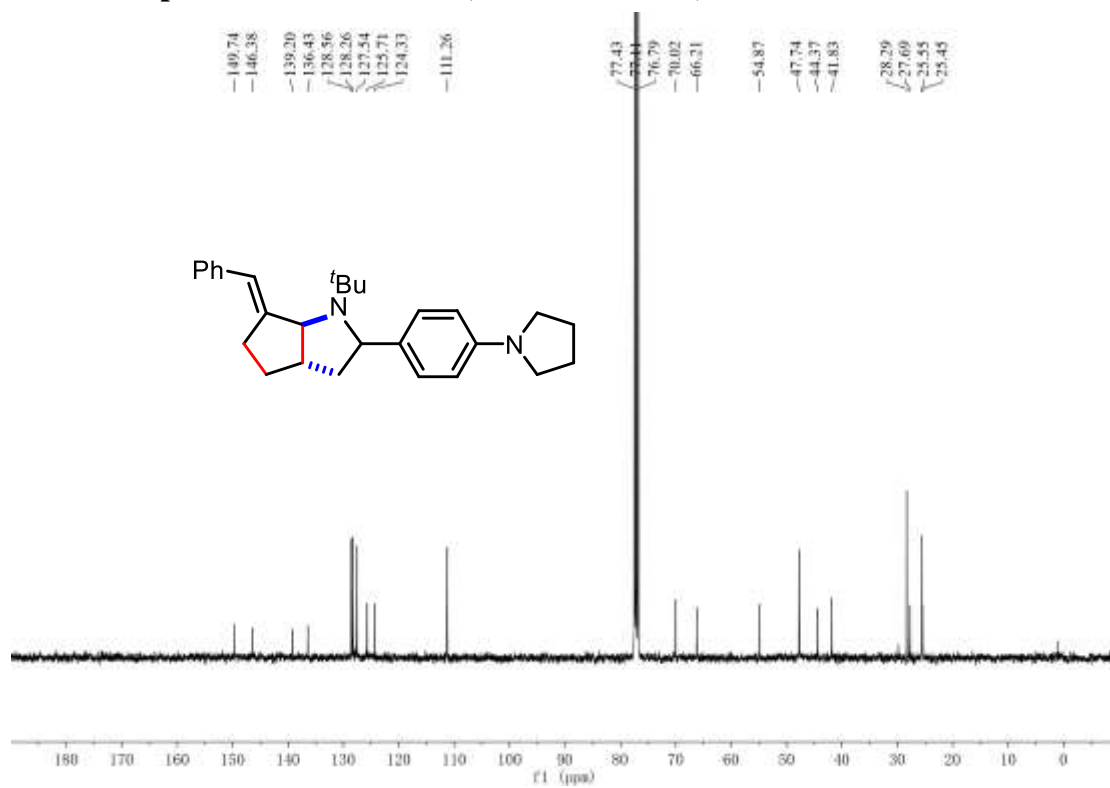

**$^{135}\text{DEPT}$  spectrum of *trans*-3av'**

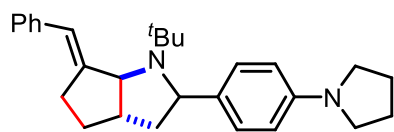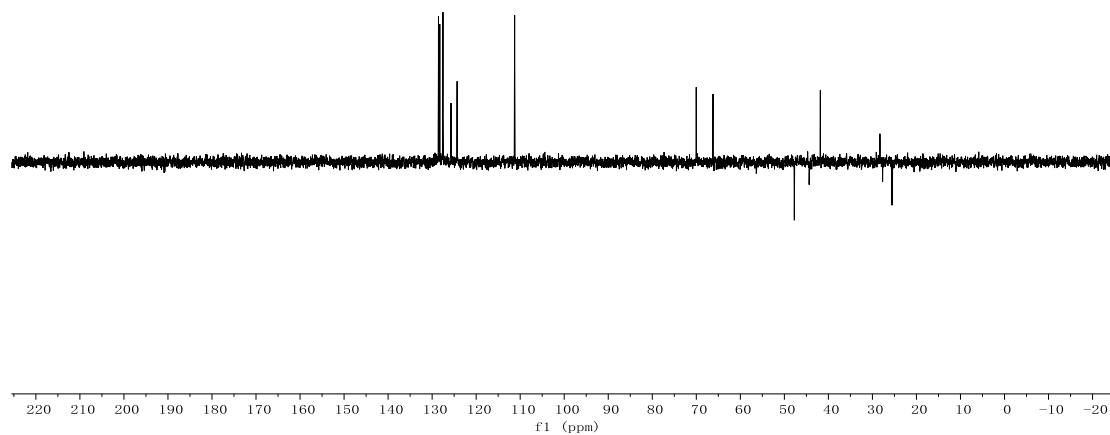

**HMBC spectrum of *trans*-3av'**

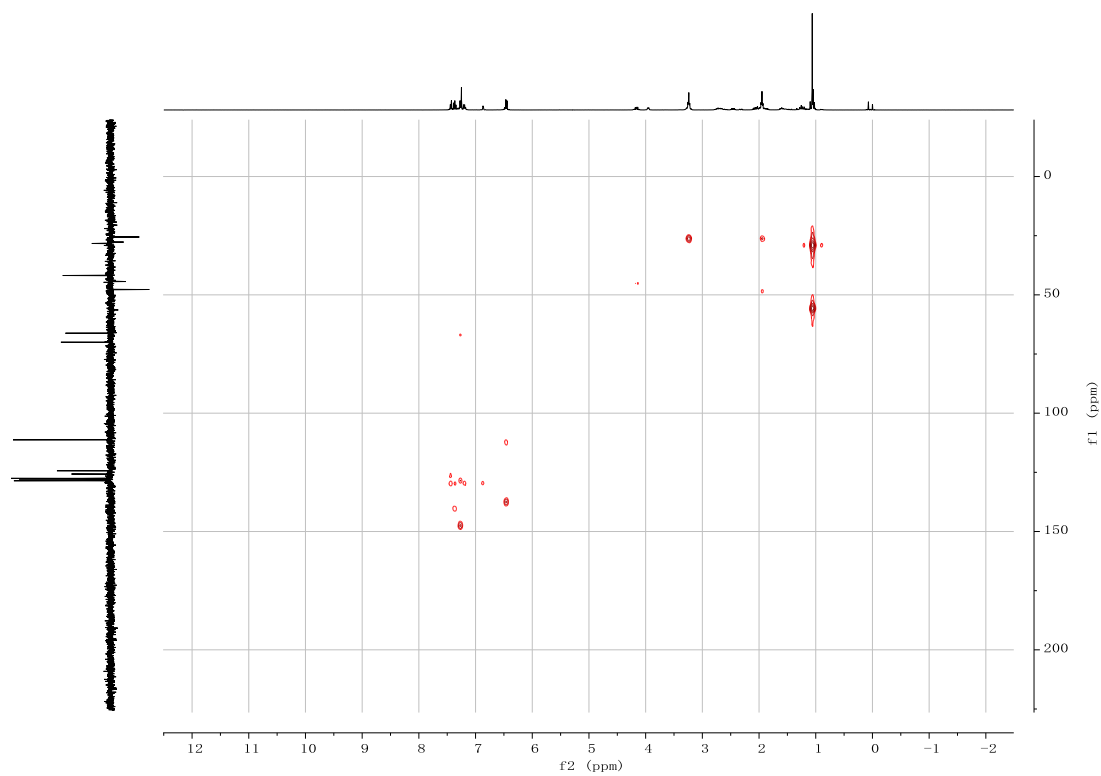

### HSQC spectrum of *trans*-3av'

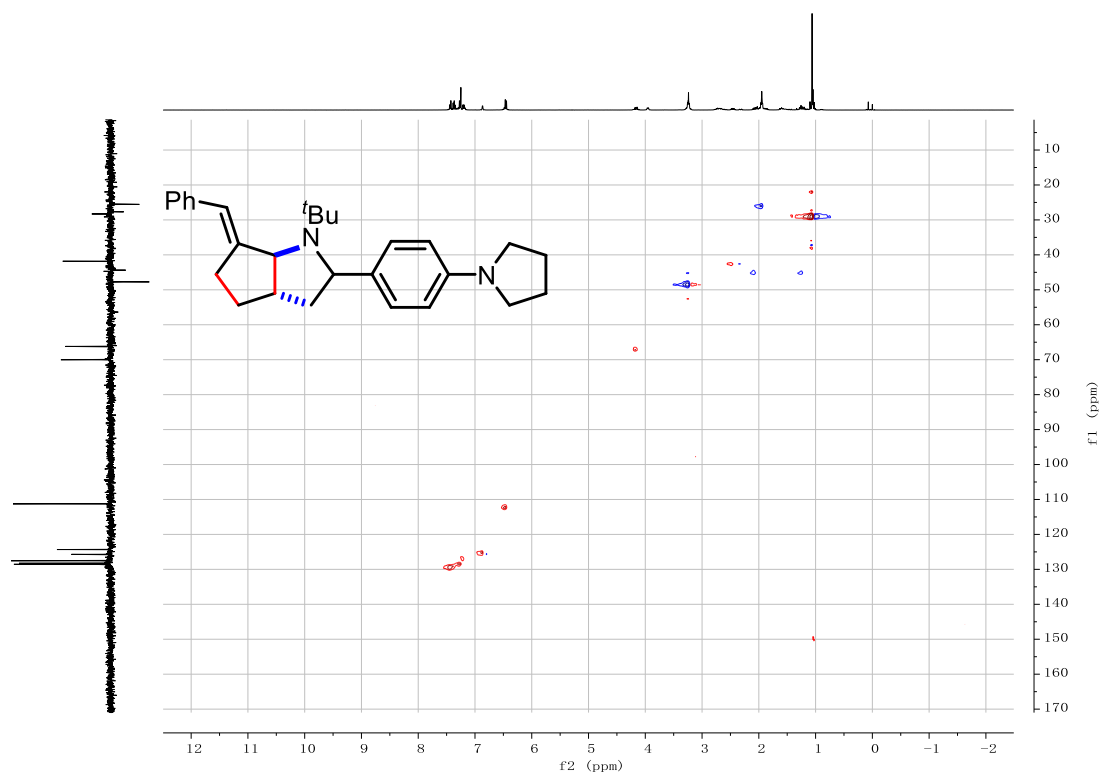

### HMQC spectrum of *trans*-3av'

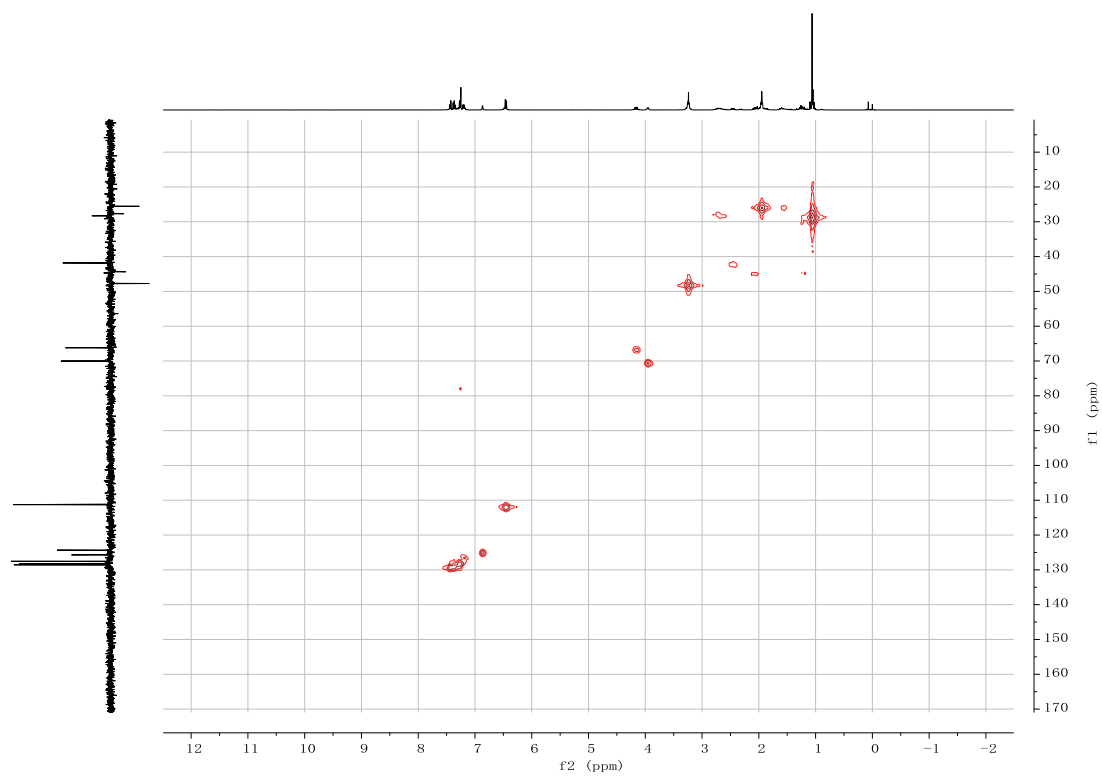

### COSY spectrum of *trans*-3av'

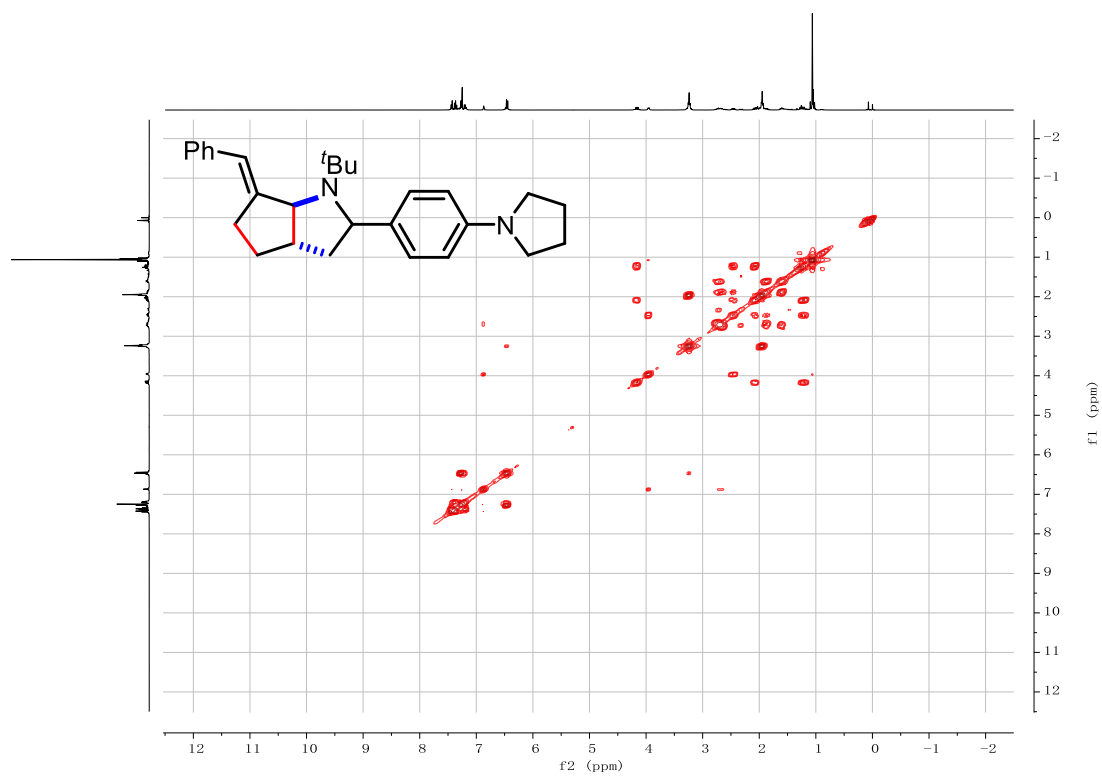

### NOE spectrum of *trans*-3av'

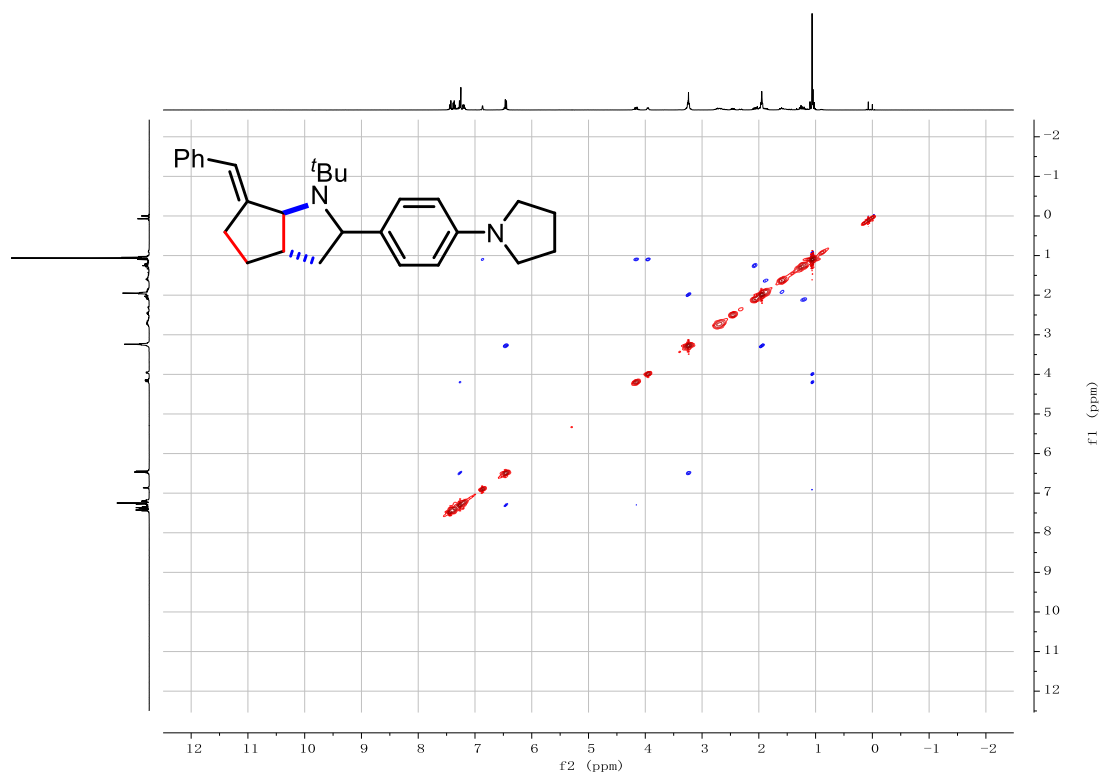

**<sup>1</sup>H NMR spectrum of *trans*-3aw (400 MHz, CDCl<sub>3</sub>)**

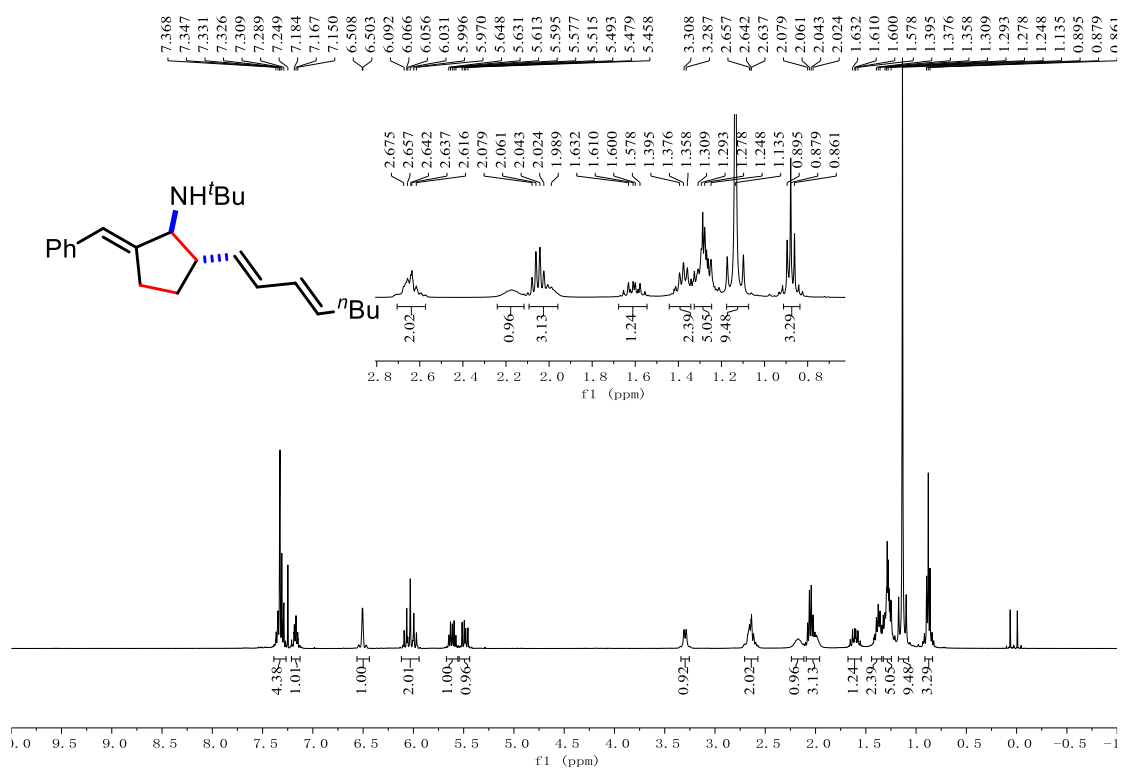

**<sup>13</sup>C NMR spectrum of *trans*-3aw (101 MHz, CDCl<sub>3</sub>)**

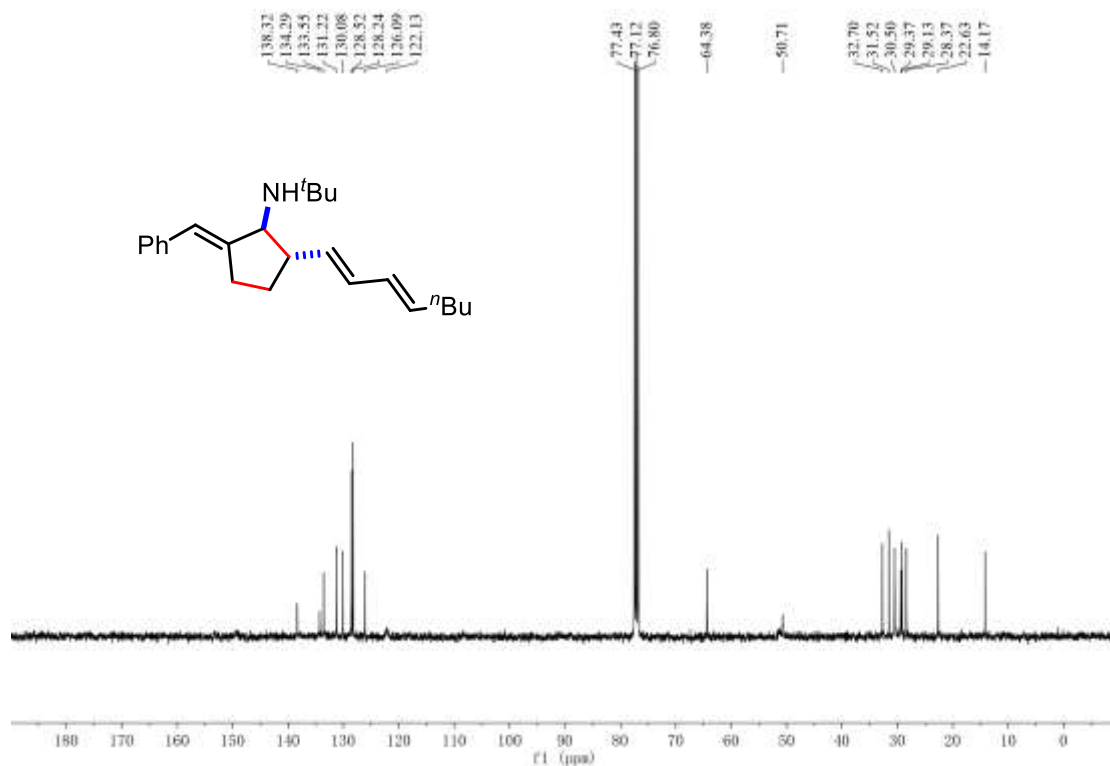

**<sup>1</sup>H NMR spectrum of *trans*-3ax (400 MHz, CDCl<sub>3</sub>)**

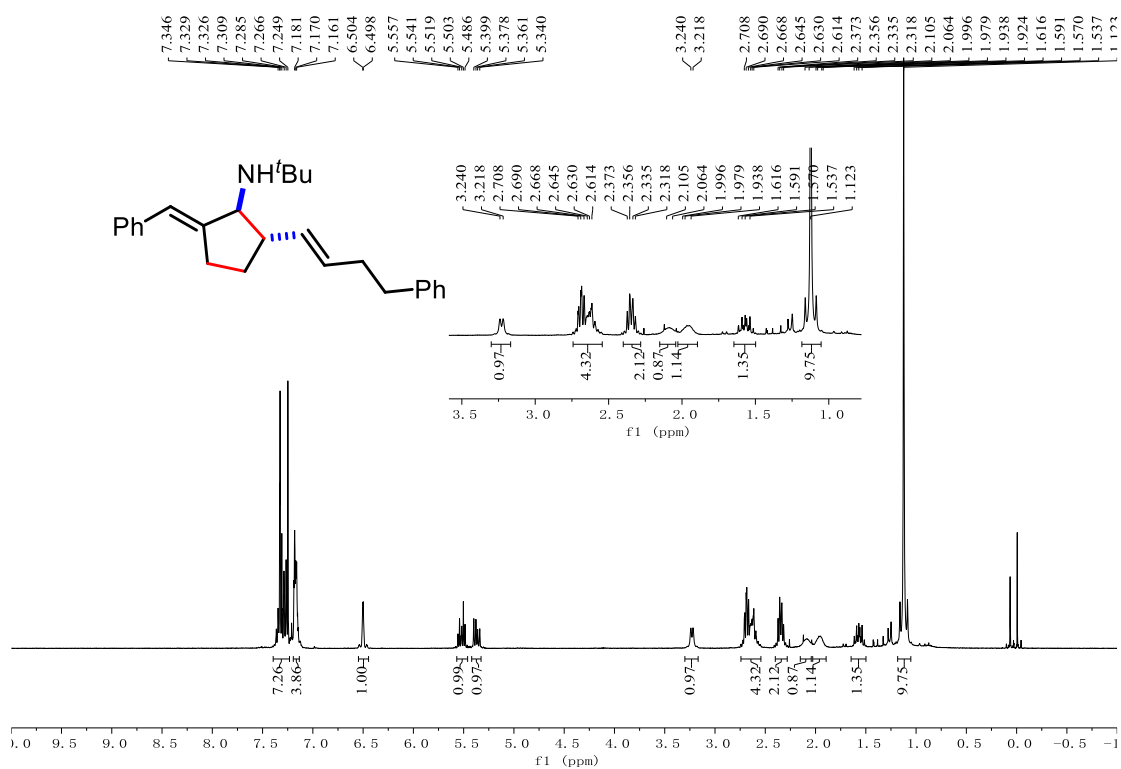

**<sup>13</sup>C NMR spectrum of *trans*-3ax (101 MHz, CDCl<sub>3</sub>)**

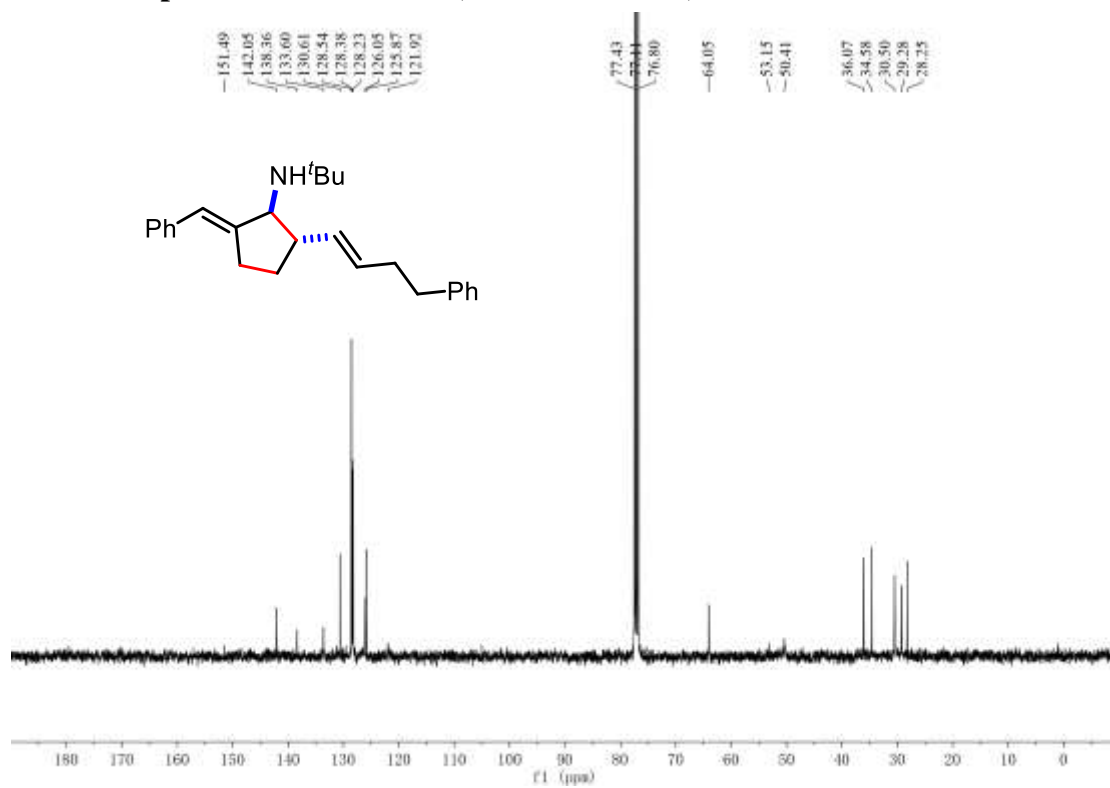

**<sup>1</sup>H NMR spectrum of *trans*-3ay (400 MHz, CDCl<sub>3</sub>)**

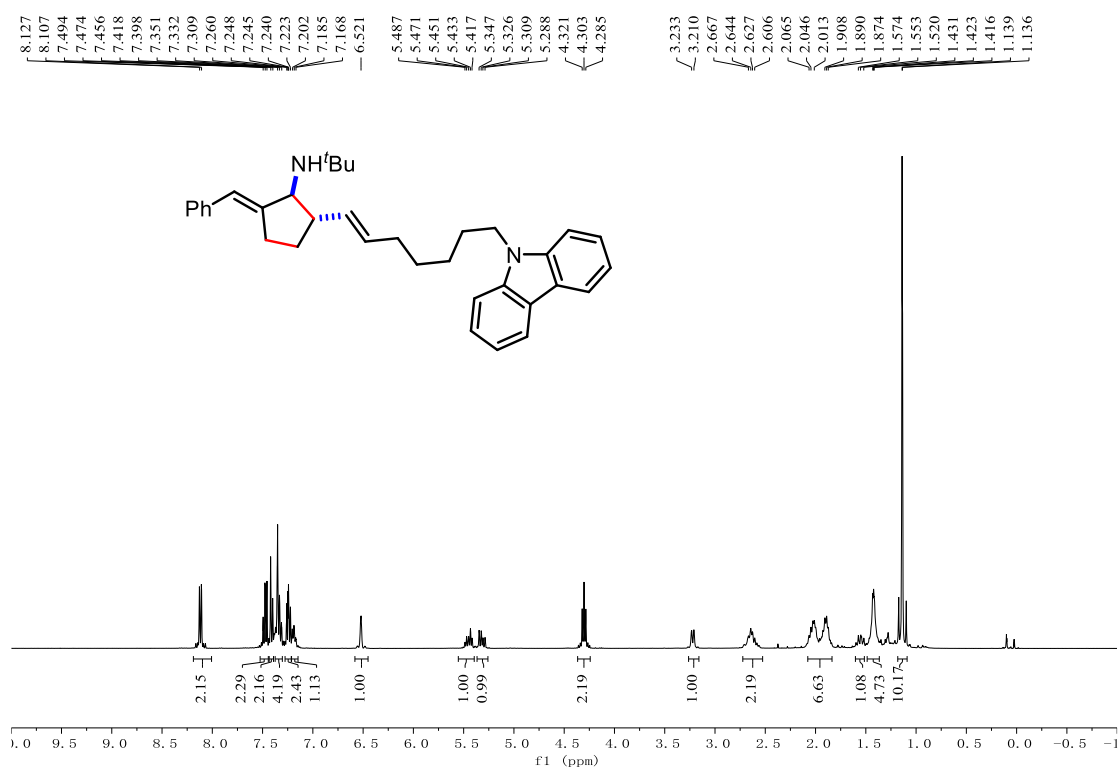

**<sup>13</sup>C NMR spectrum of *trans*-3ay (101 MHz, CDCl<sub>3</sub>)**

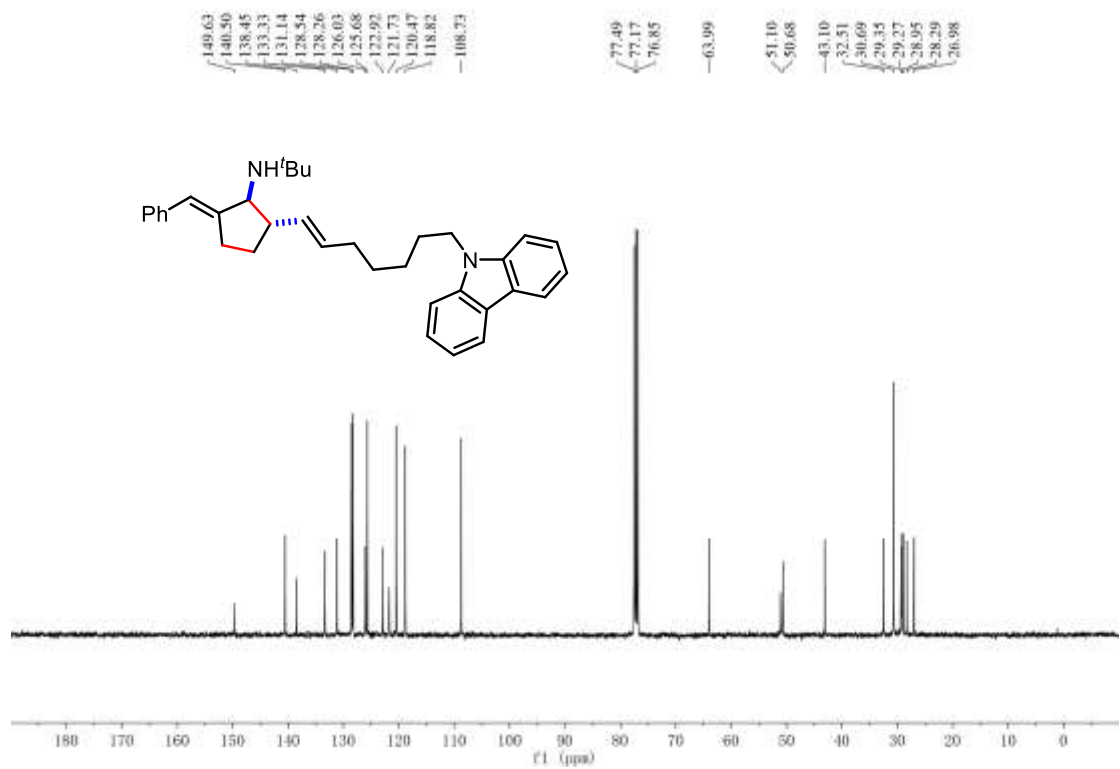

**<sup>1</sup>H NMR spectrum of *trans*-3az (600 MHz, CDCl<sub>3</sub>)**

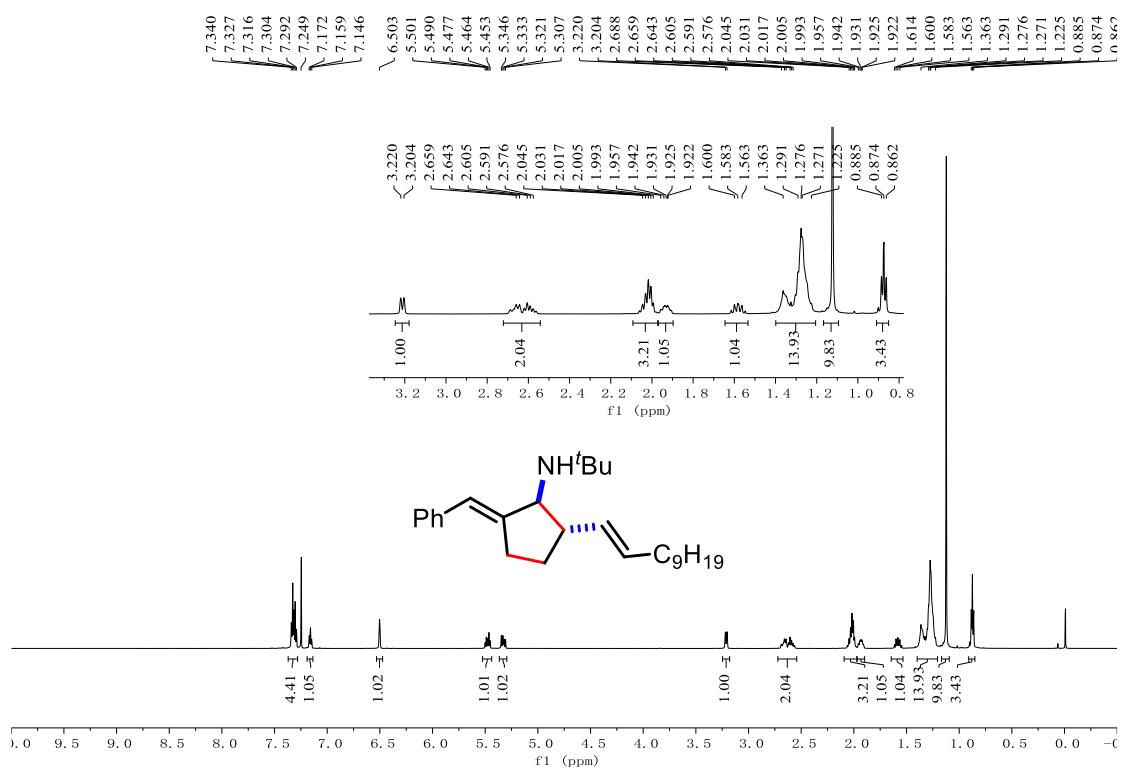

**<sup>13</sup>C NMR spectrum of *trans*-3az (101 MHz, CDCl<sub>3</sub>)**

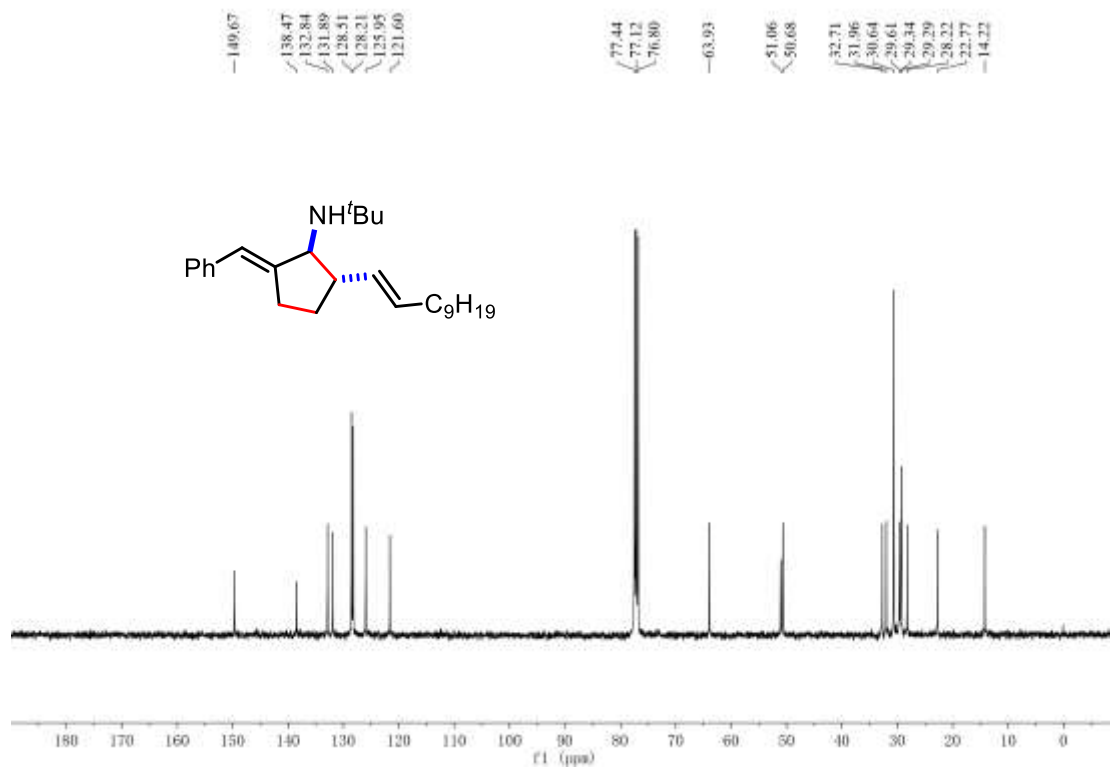

**<sup>1</sup>H NMR spectrum of *trans*-3aaa (600 MHz, CDCl<sub>3</sub>)**

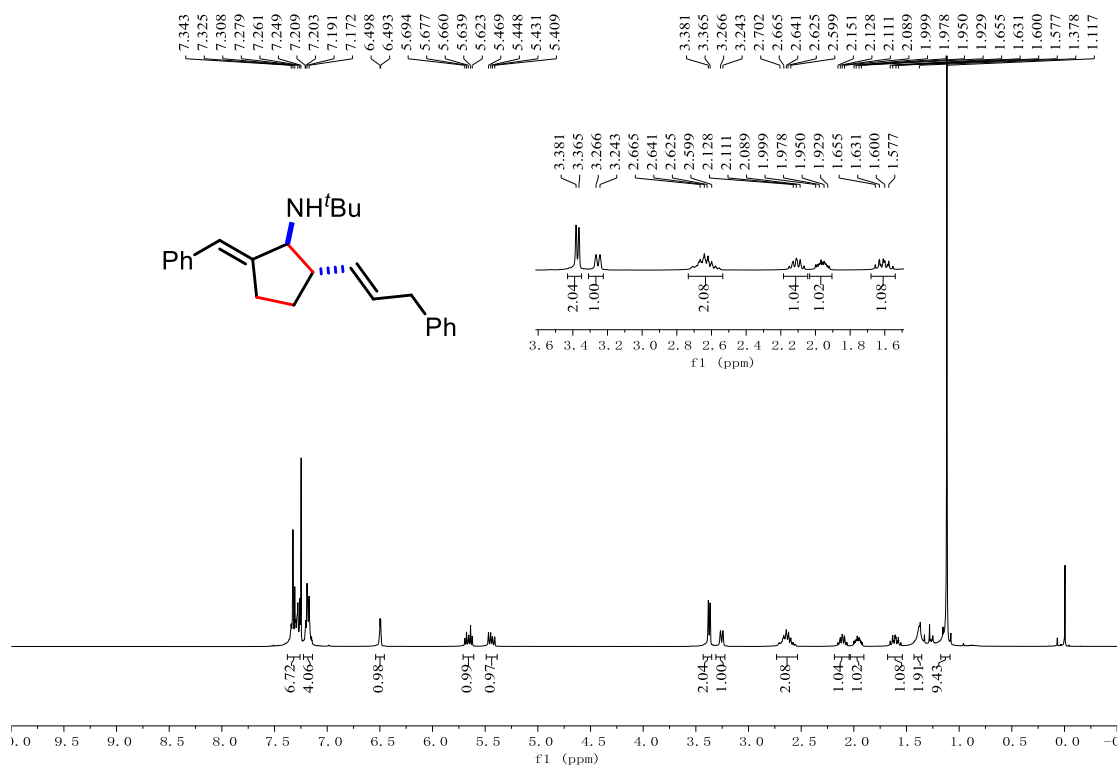

**<sup>13</sup>C NMR spectrum of *trans*-3aaa (101 MHz, CDCl<sub>3</sub>)**

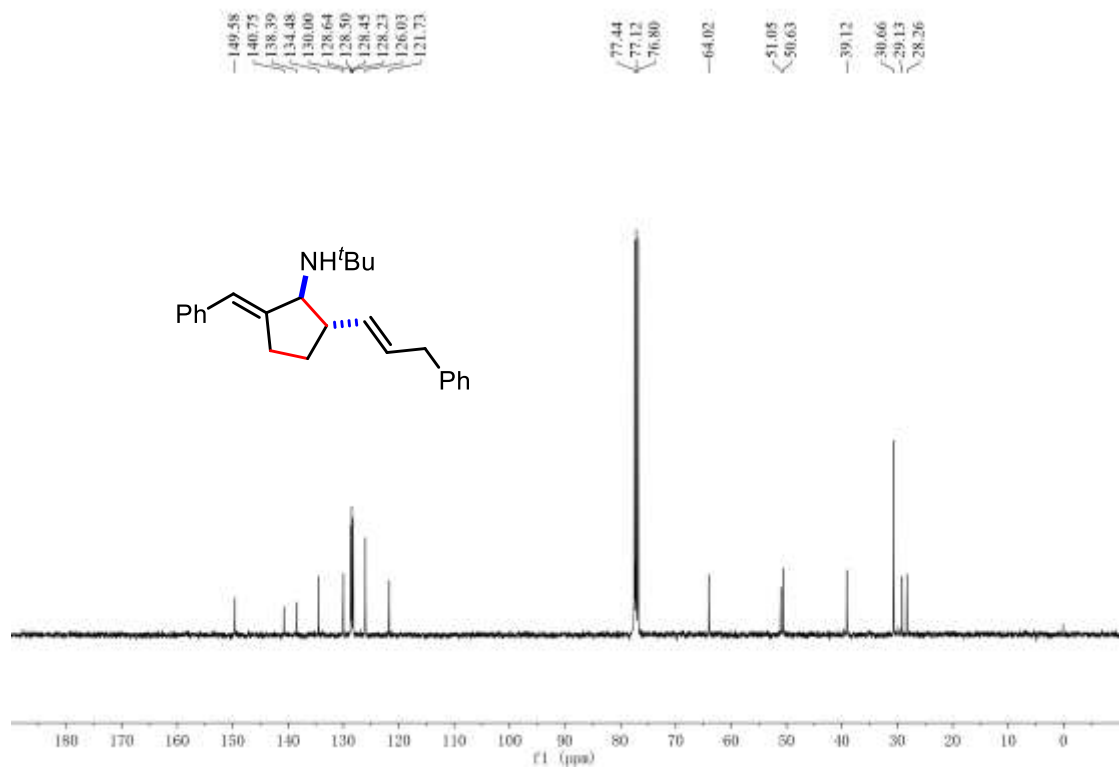

**<sup>1</sup>H NMR spectrum of *trans*-3aab (600 MHz, CDCl<sub>3</sub>)**

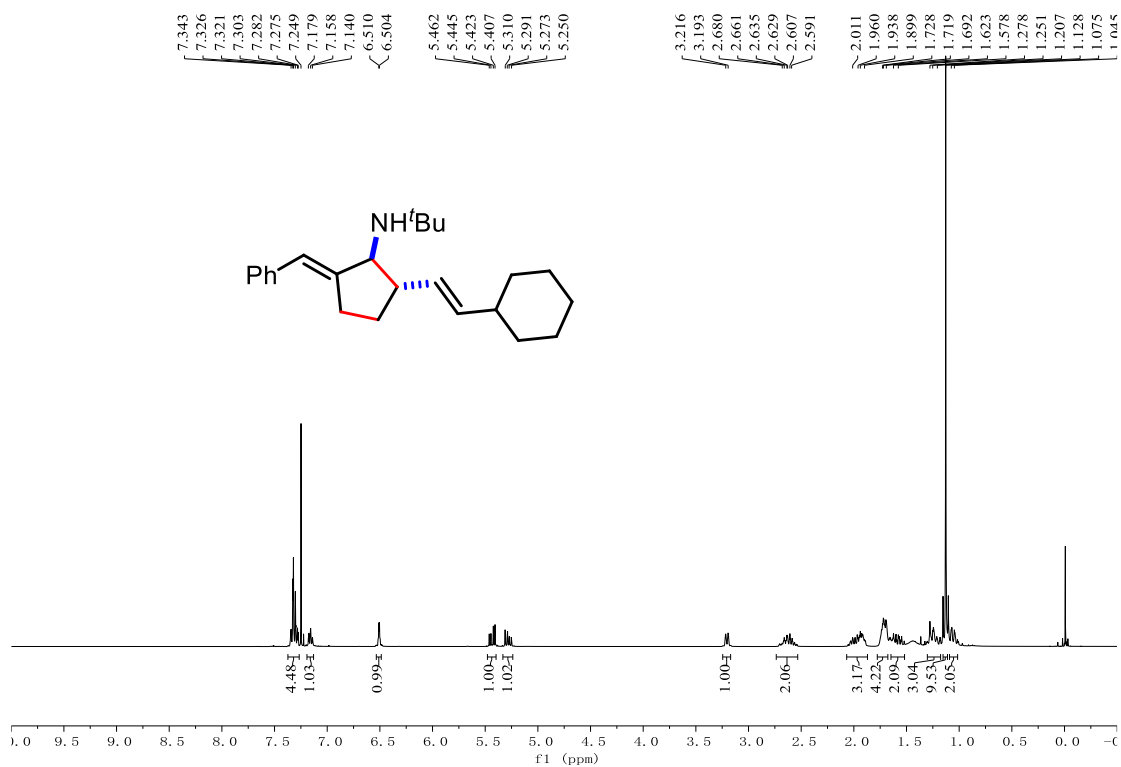

**<sup>13</sup>C NMR spectrum of *trans*-3aab (101 MHz, CDCl<sub>3</sub>)**

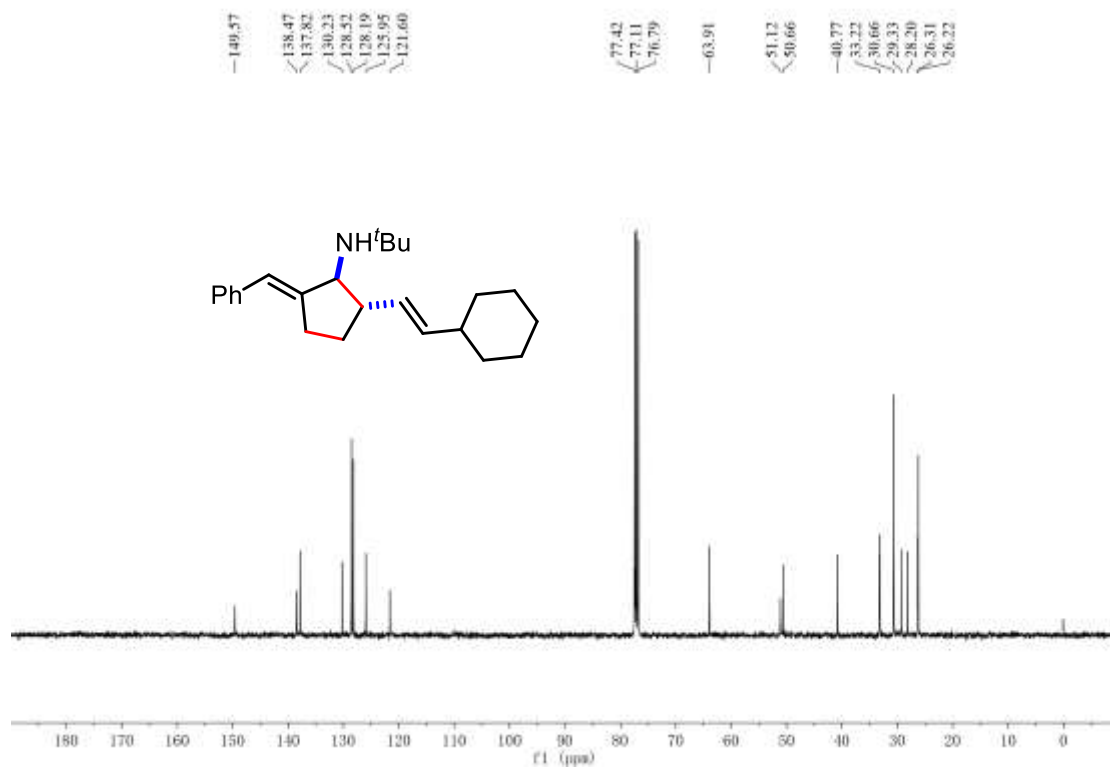

**<sup>1</sup>H NMR spectrum of *cis*-3aac (400 MHz, CDCl<sub>3</sub>)**

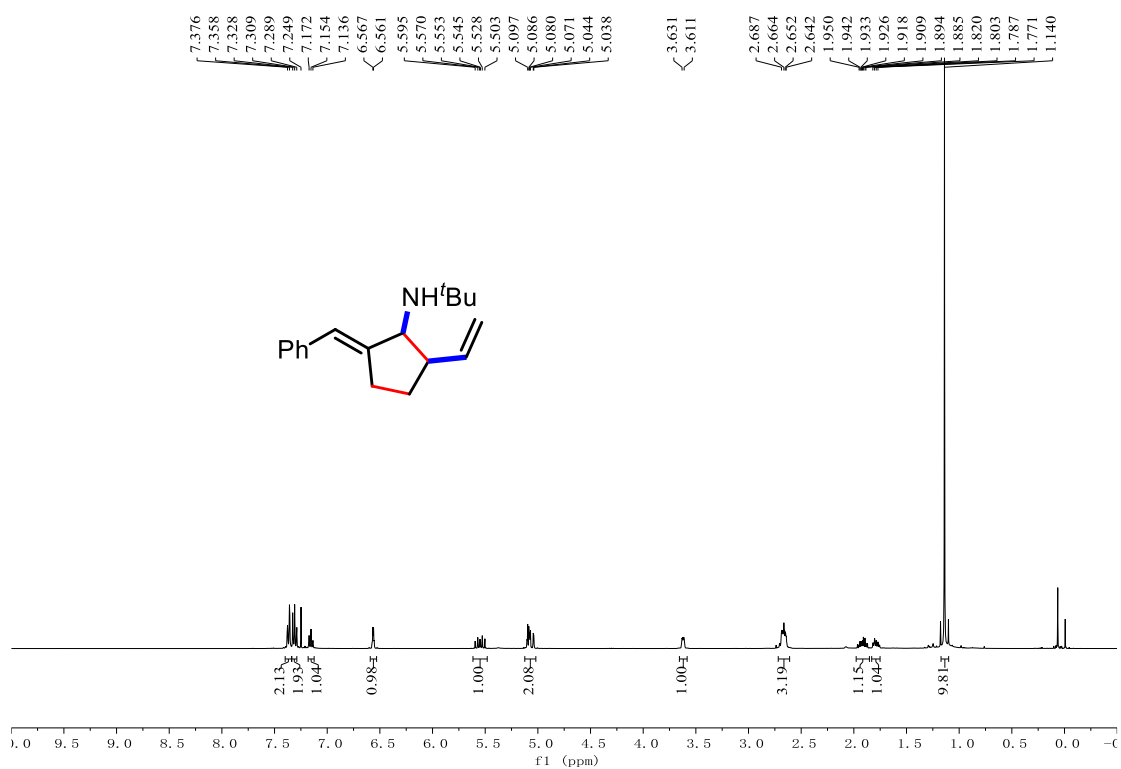

**<sup>13</sup>C NMR spectrum of *cis*-3aac (101 MHz, CDCl<sub>3</sub>)**

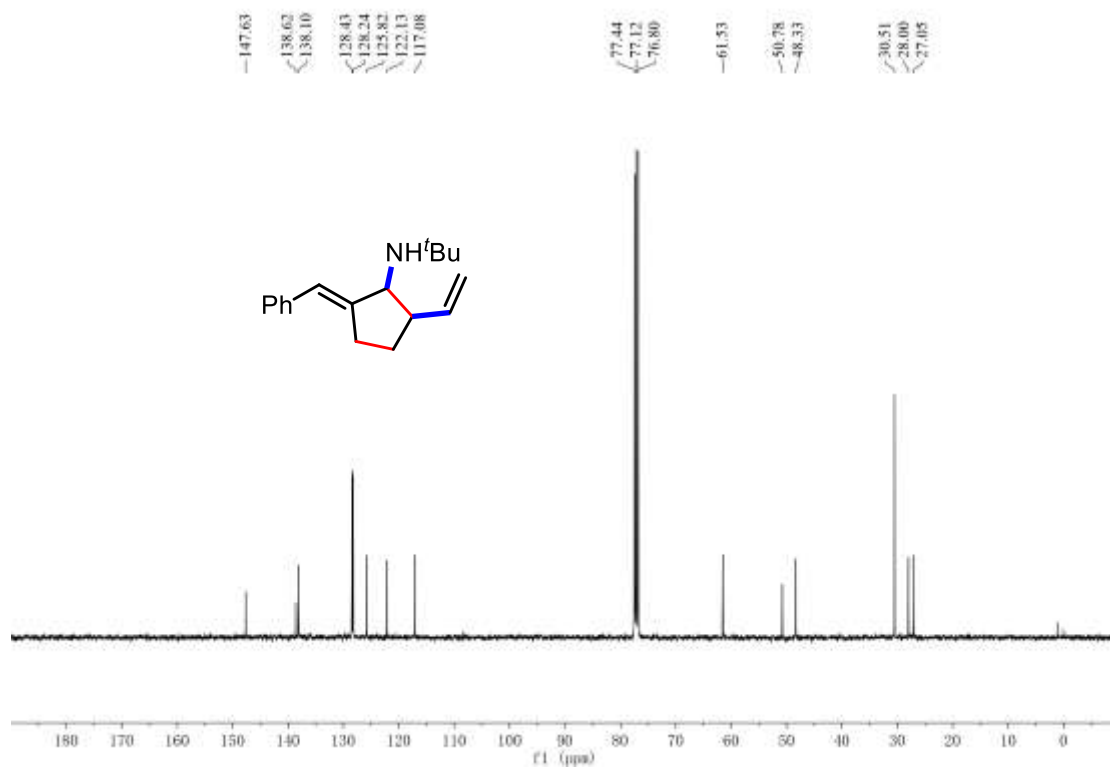

**<sup>1</sup>H NMR spectrum of *trans*-3aac (400 MHz, CDCl<sub>3</sub>)**

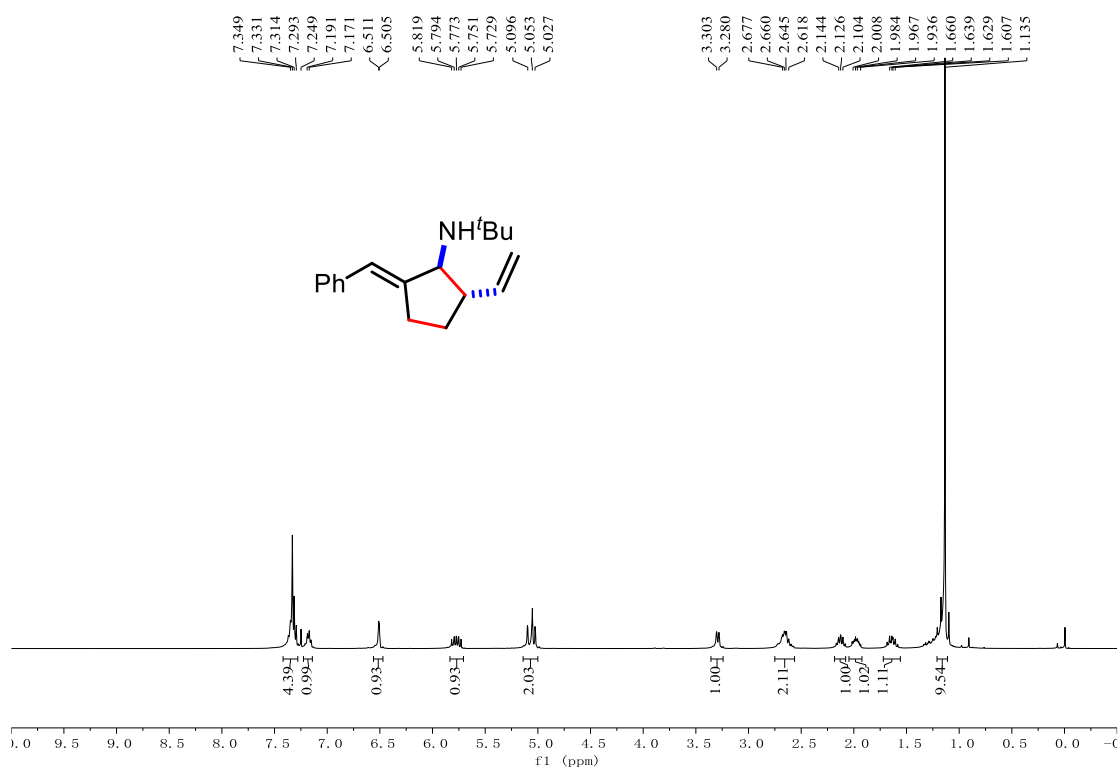

**<sup>13</sup>C NMR spectrum of *trans*-3aac (101 MHz, CDCl<sub>3</sub>)**

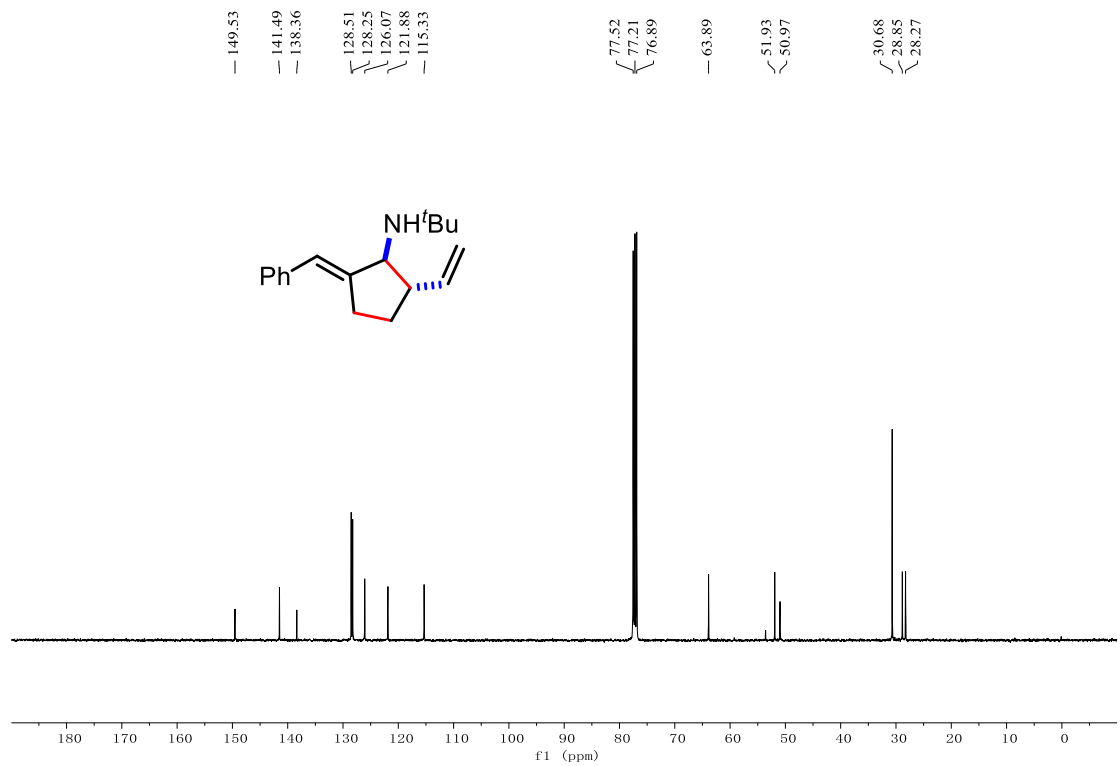

**<sup>1</sup>H NMR spectrum of *cis*-3aad (400 MHz, CDCl<sub>3</sub>)**

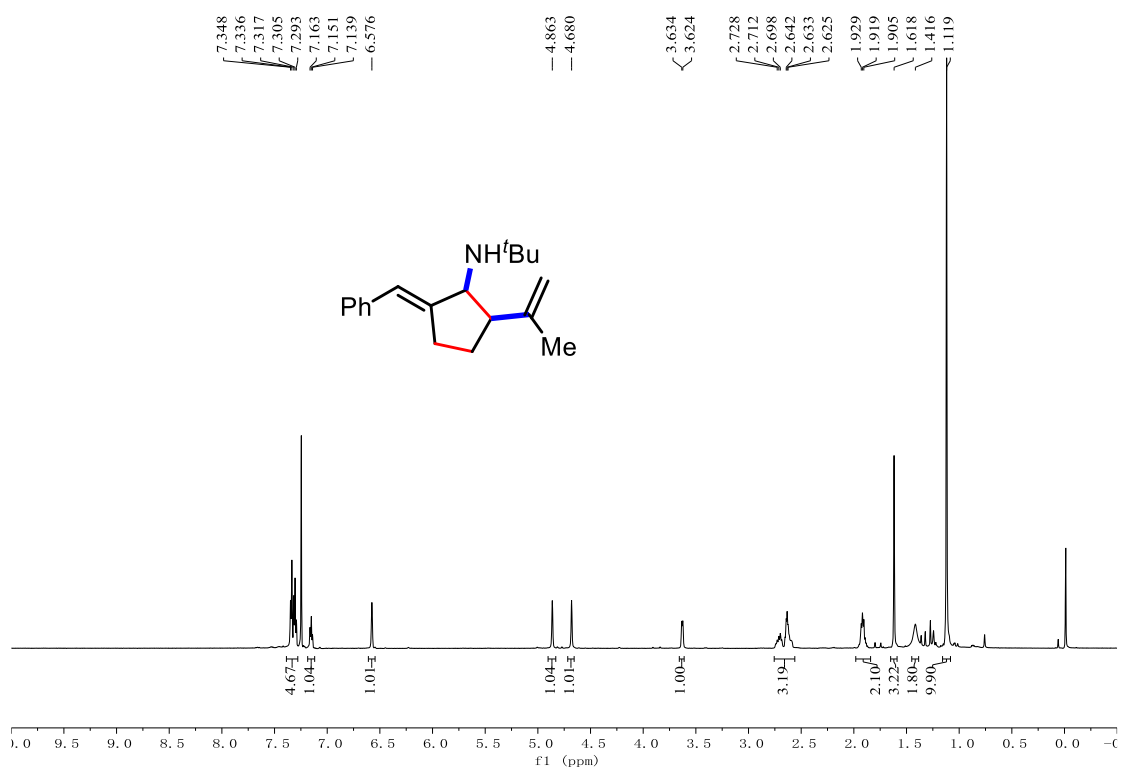

**<sup>13</sup>C NMR spectrum of *cis*-3aad (101 MHz, CDCl<sub>3</sub>)**

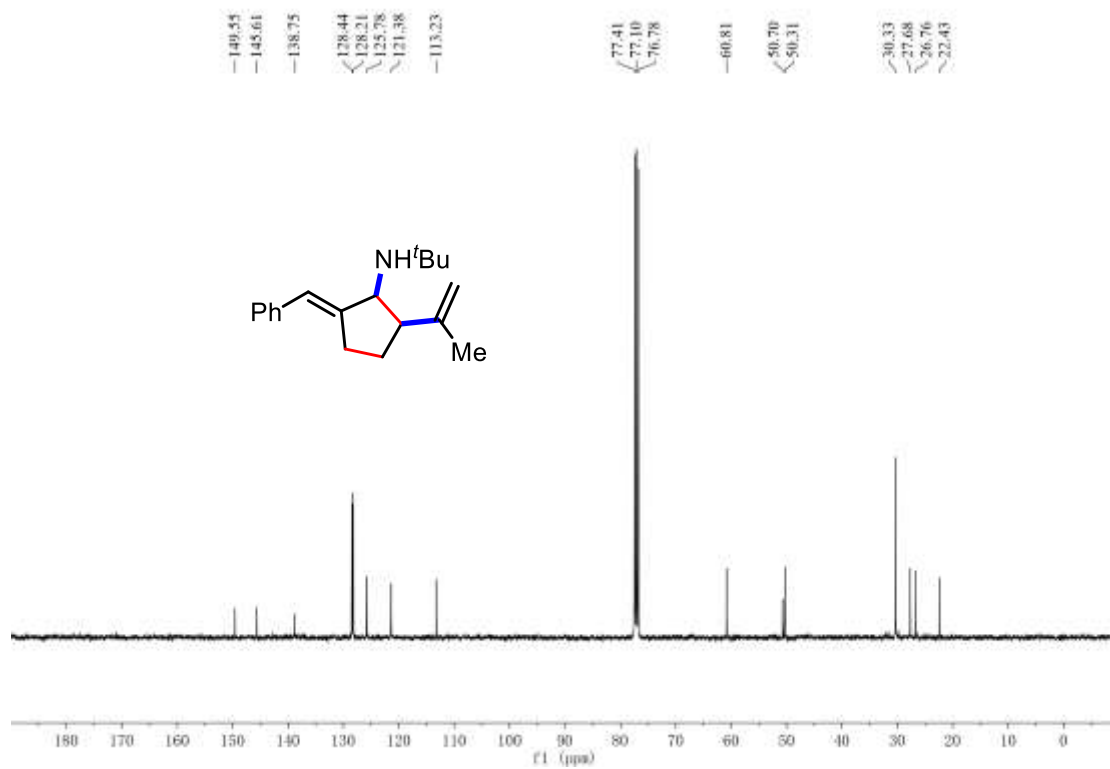

**<sup>1</sup>H NMR spectrum of *trans*-3aad (400 MHz, CDCl<sub>3</sub>)**

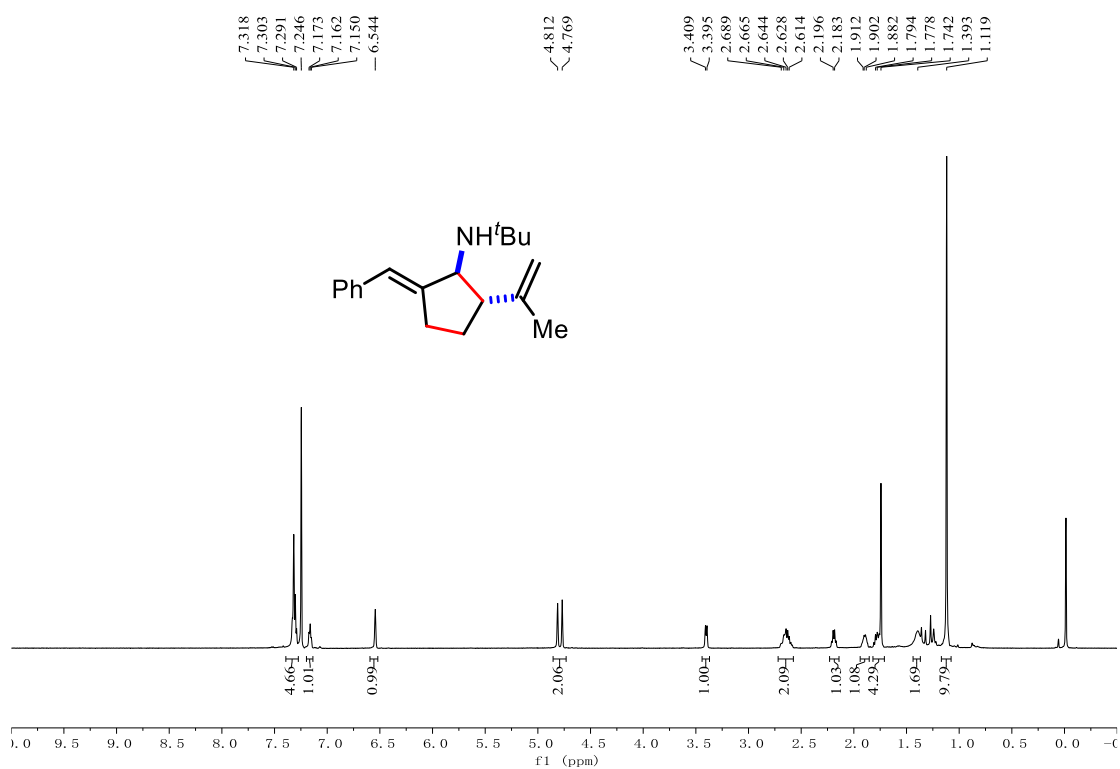

**<sup>13</sup>C NMR spectrum of *trans*-3aad (101 MHz, CDCl<sub>3</sub>)**

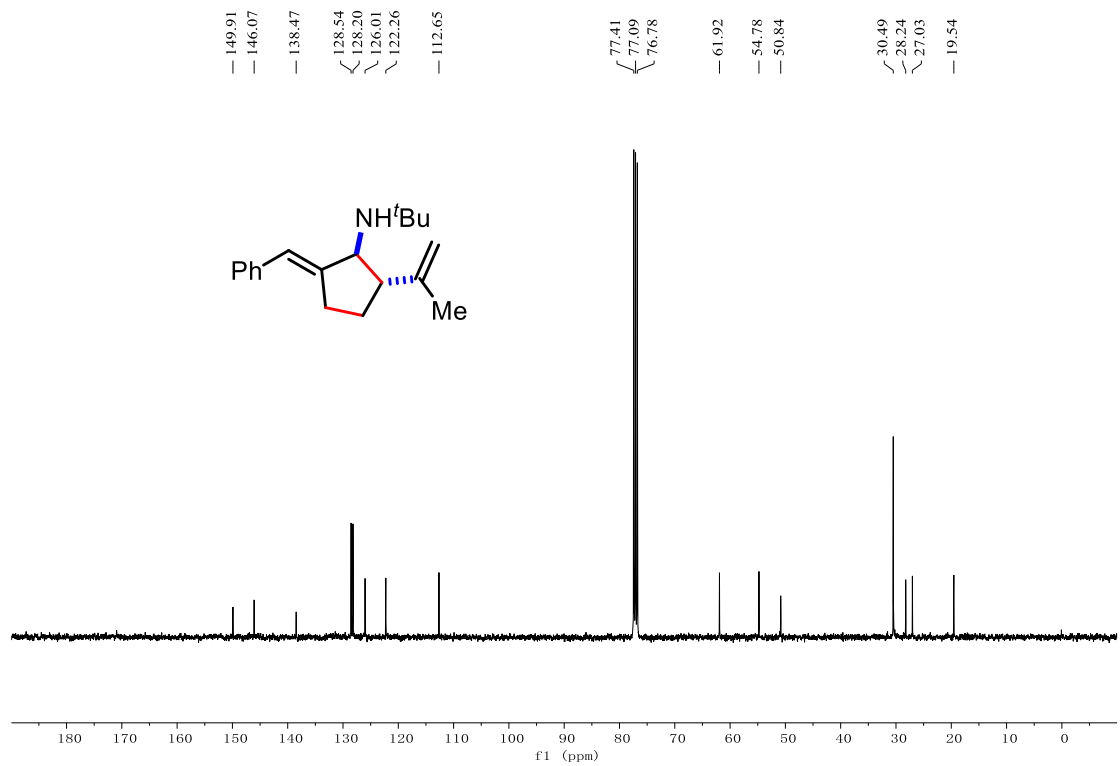

**<sup>1</sup>H NMR spectrum of *cis*-3aae (400 MHz, CDCl<sub>3</sub>)**

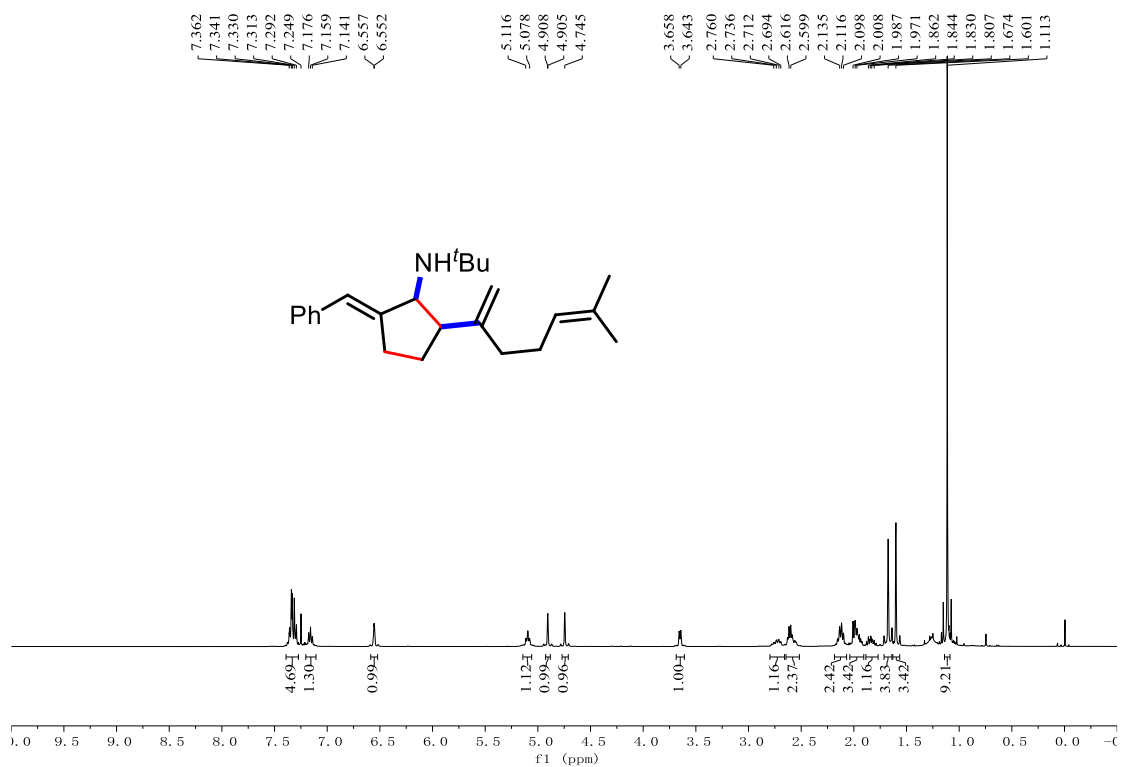

**<sup>13</sup>C NMR spectrum of *cis*-3aae (101 MHz, CDCl<sub>3</sub>)**

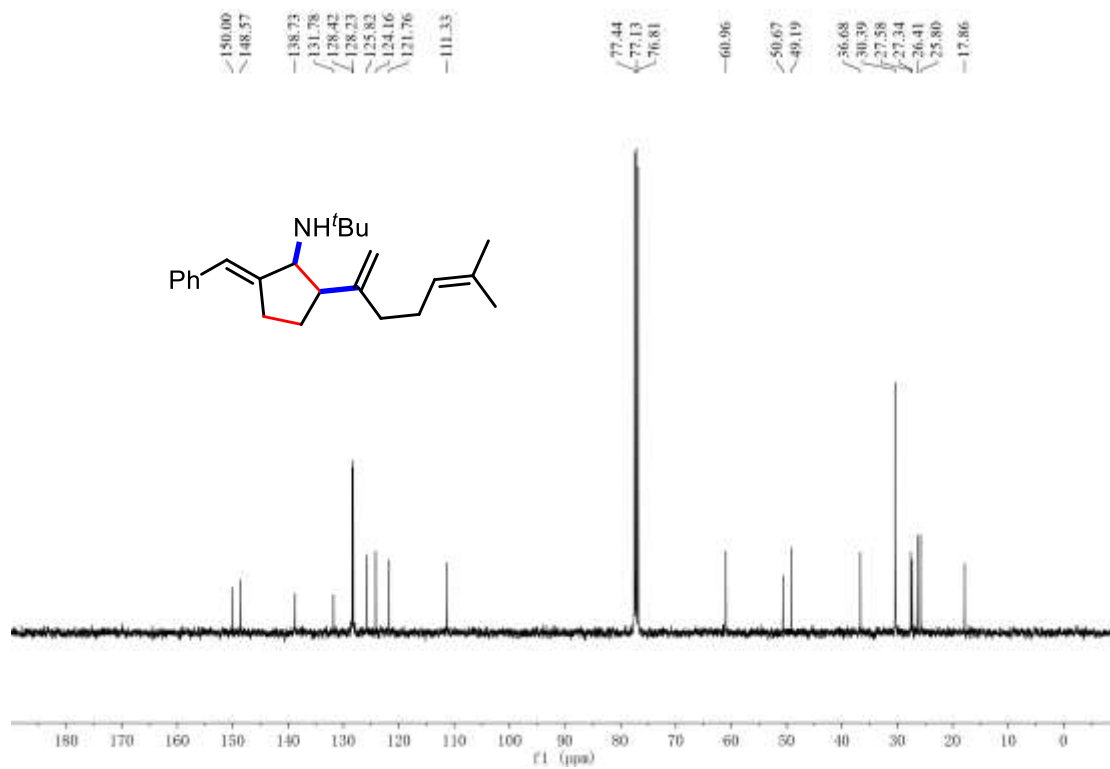

**<sup>1</sup>H NMR spectrum of *cis*-3aaf (400 MHz, CDCl<sub>3</sub>)**

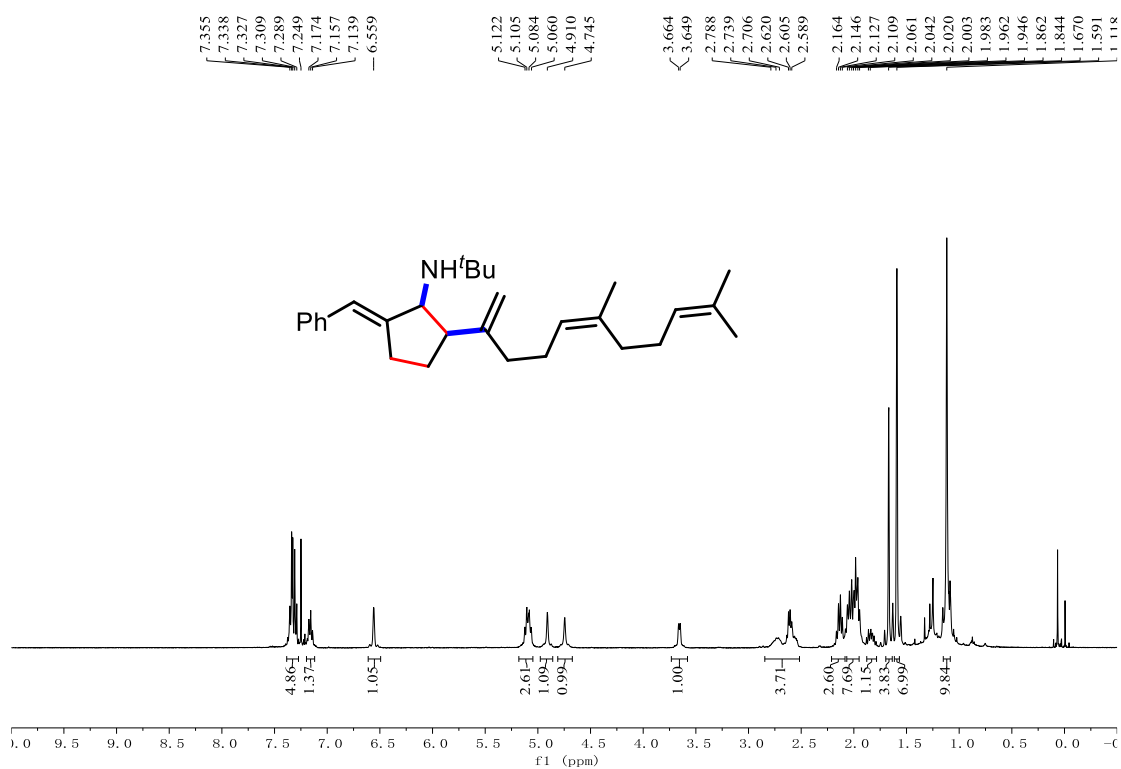

**<sup>13</sup>C NMR spectrum of *cis*-3aaf (101 MHz, CDCl<sub>3</sub>)**

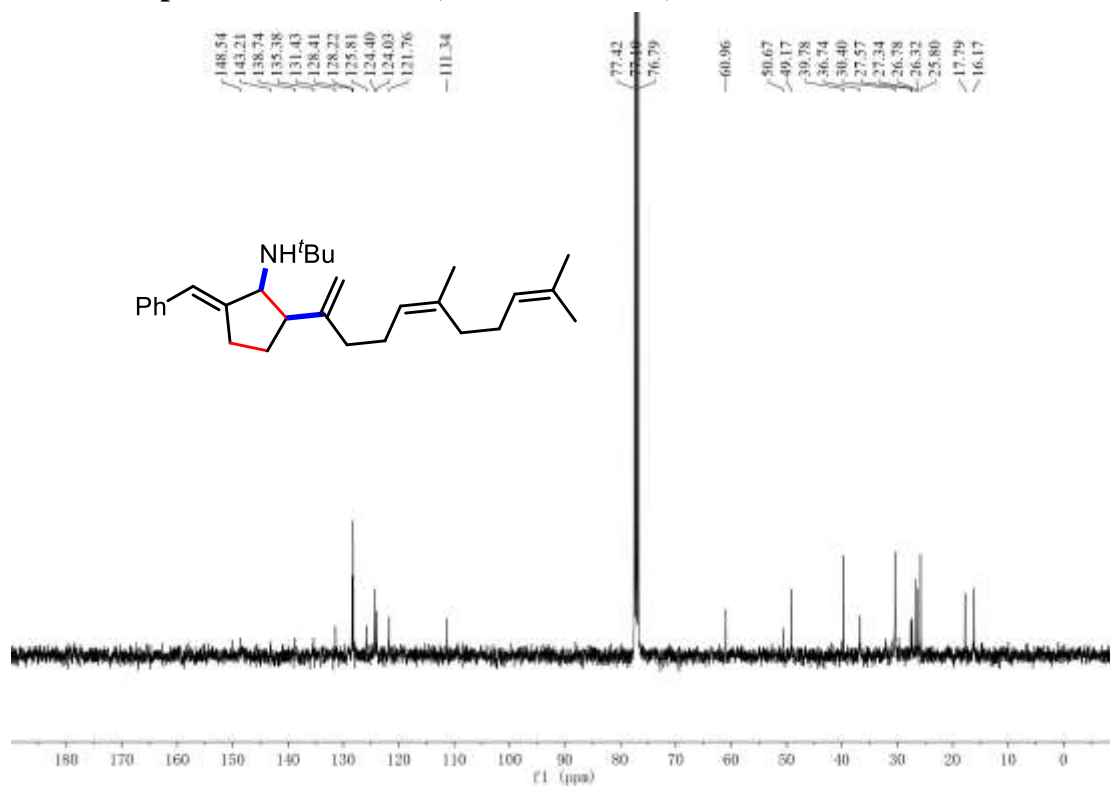

**<sup>1</sup>H NMR spectrum of *trans*-3aaf (400 MHz, CDCl<sub>3</sub>)**

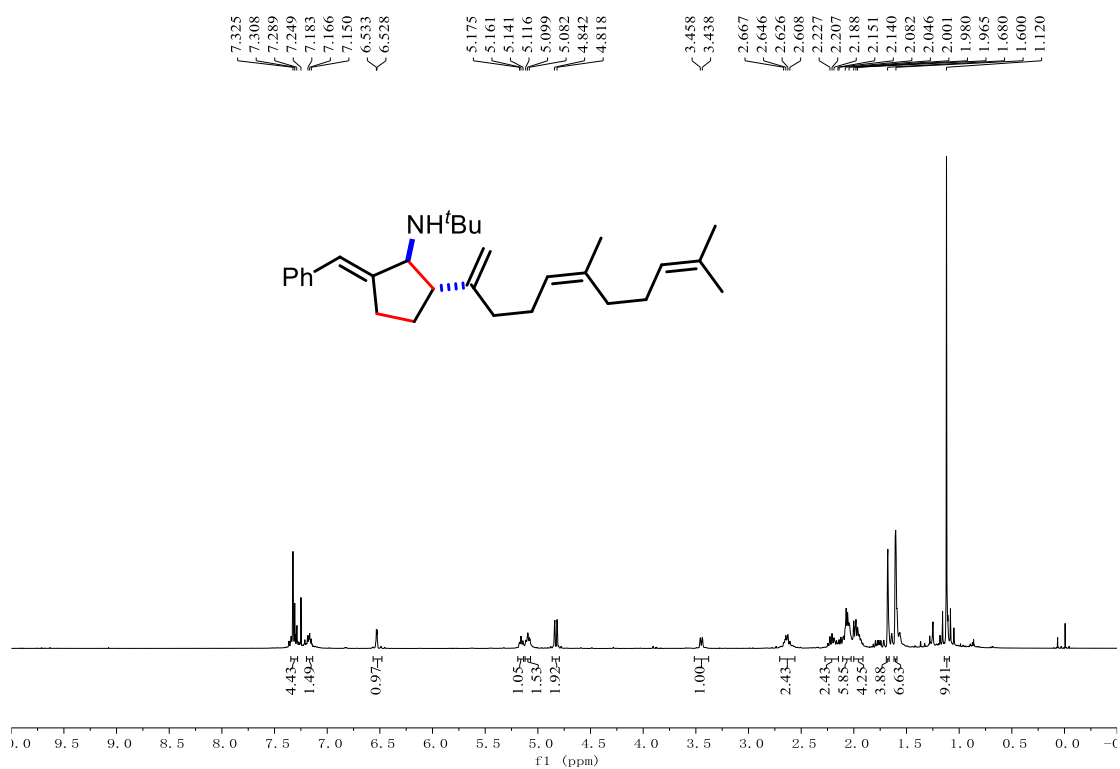

**<sup>13</sup>C NMR spectrum of *trans*-3aaf (101 MHz, CDCl<sub>3</sub>)**

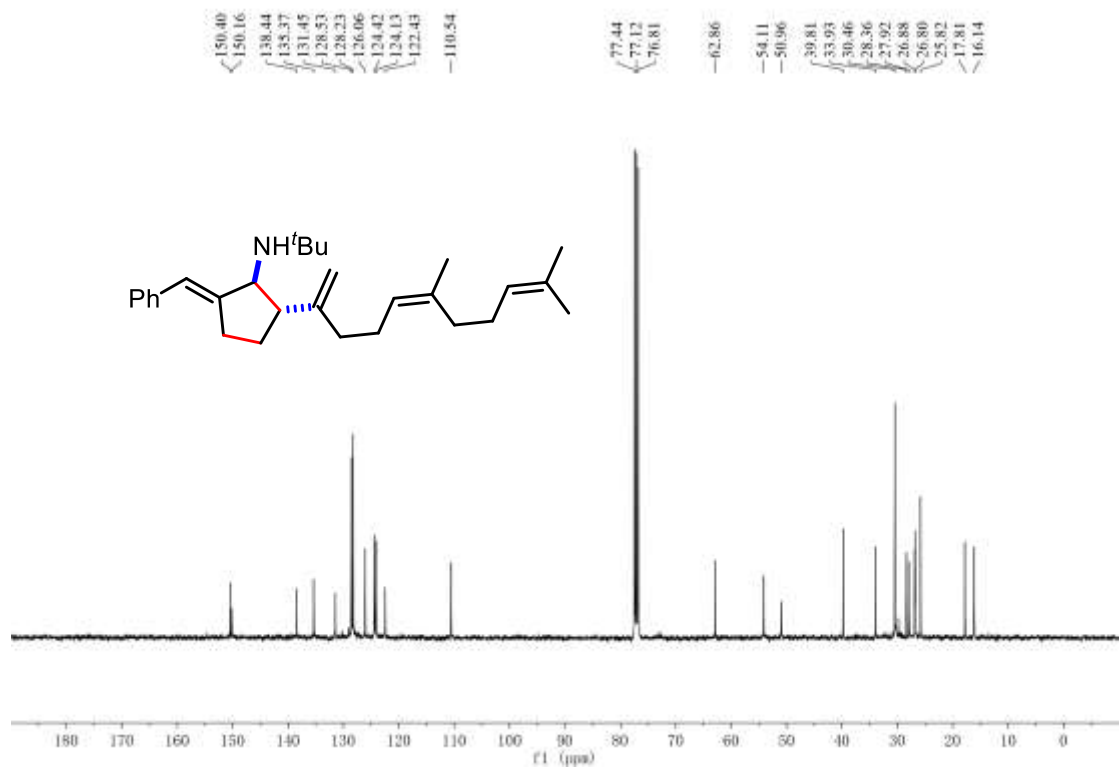

### $^1\text{H}$ NMR spectrum of *cis*-3aag (400 MHz, $\text{CDCl}_3$ )

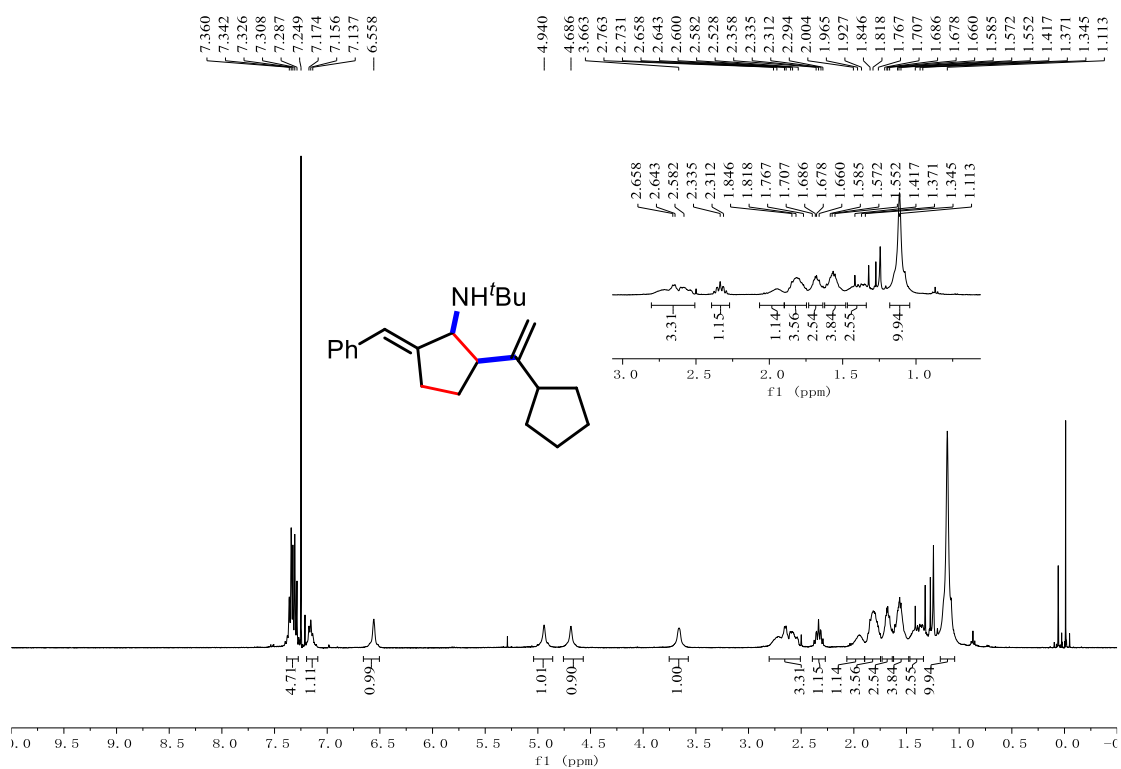

### $^{13}\text{C}$ NMR spectrum of *cis*-3aag (101 MHz, $\text{CDCl}_3$ )

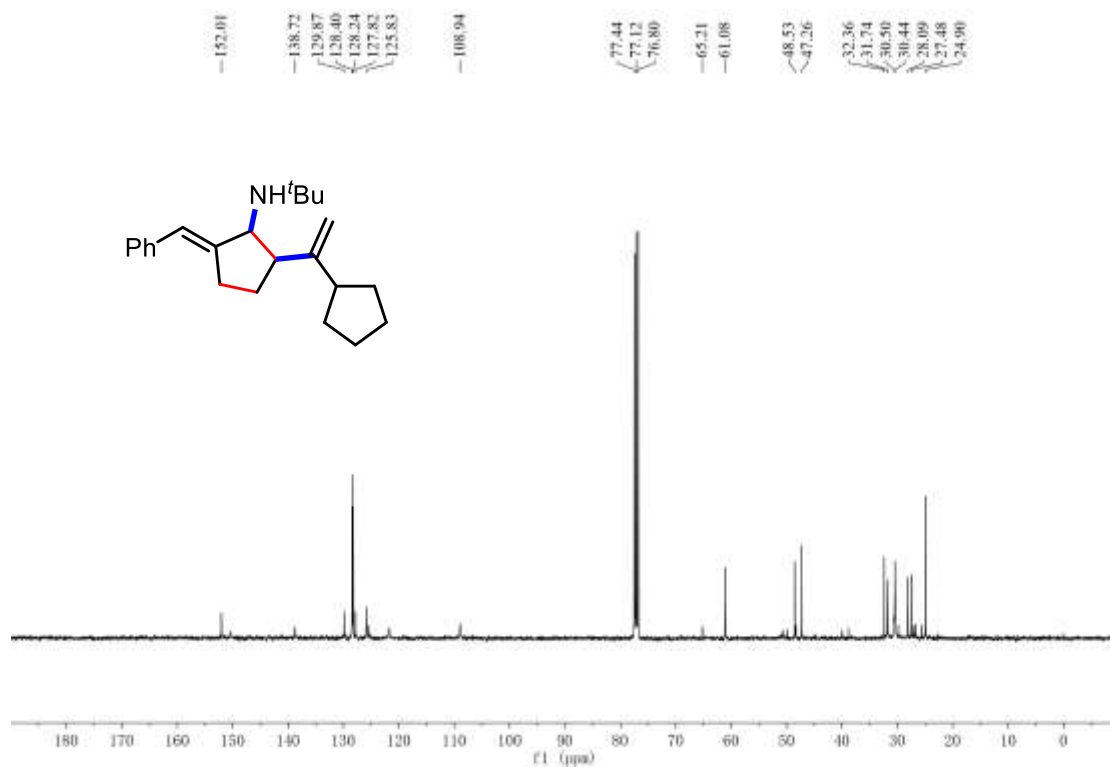

**<sup>1</sup>H NMR spectrum of *trans*-3aag (400 MHz, CDCl<sub>3</sub>)**

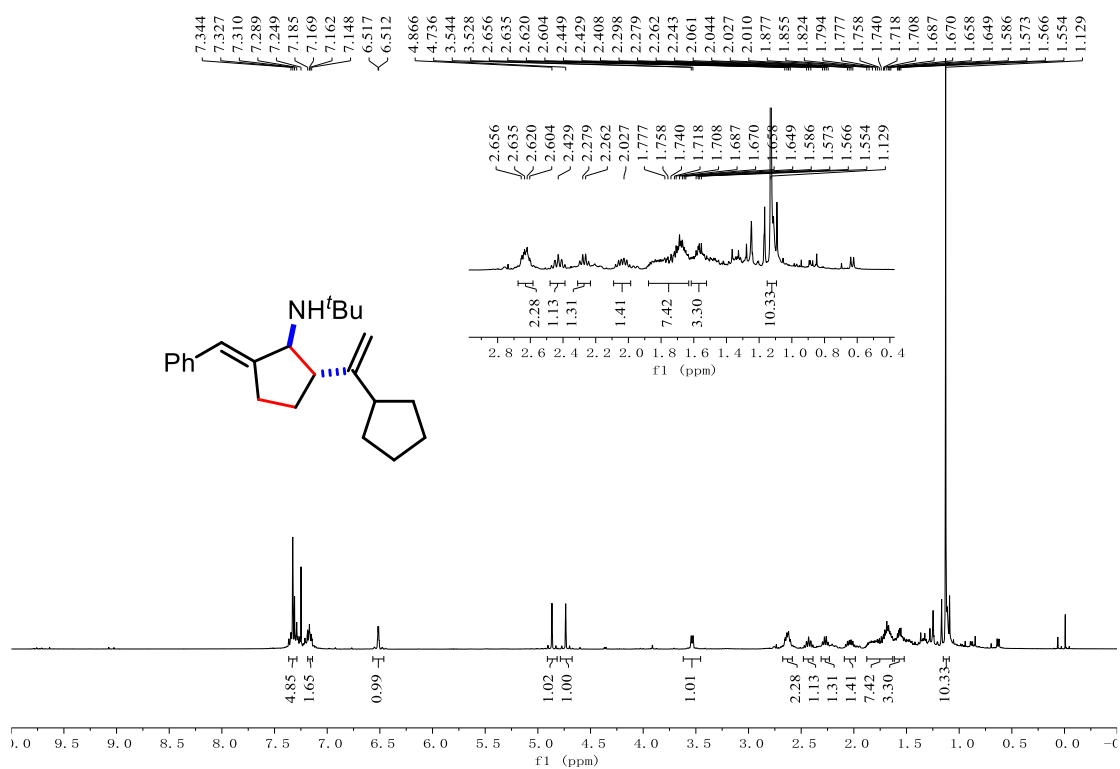

**<sup>13</sup>C NMR spectrum of *trans*-3aag (101 MHz, CDCl<sub>3</sub>)**

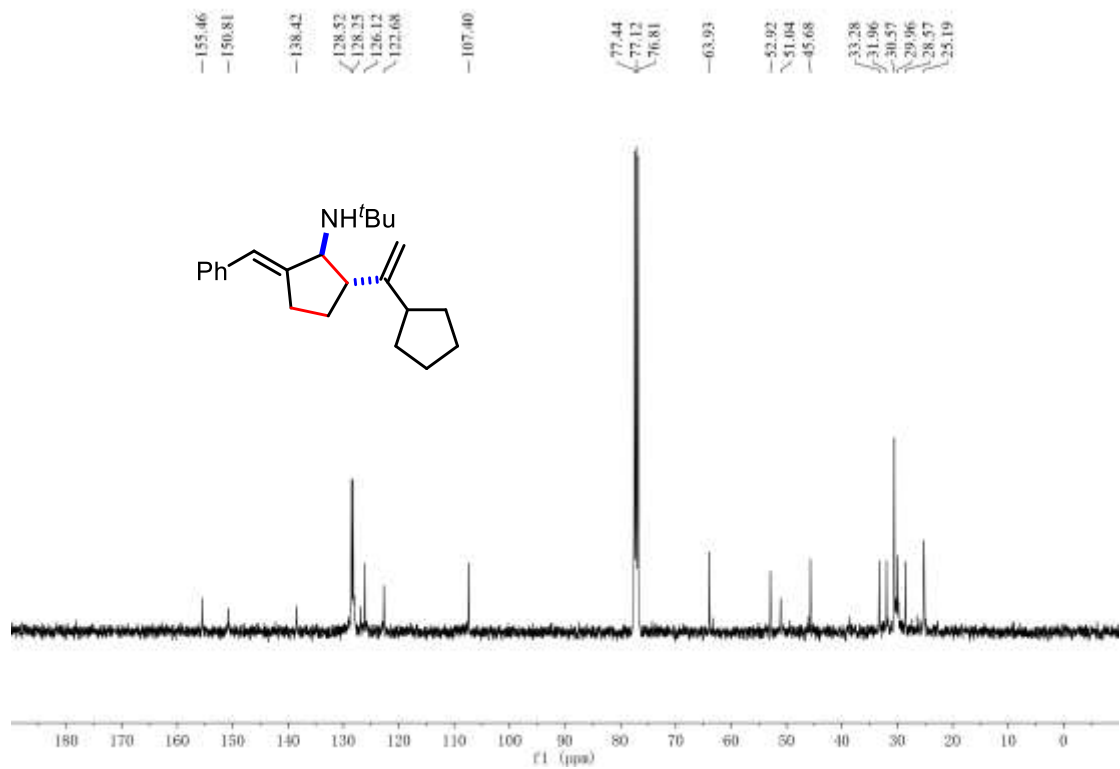

### $^1\text{H}$ NMR spectrum of *cis*-3aah (400 MHz, $\text{CDCl}_3$ )

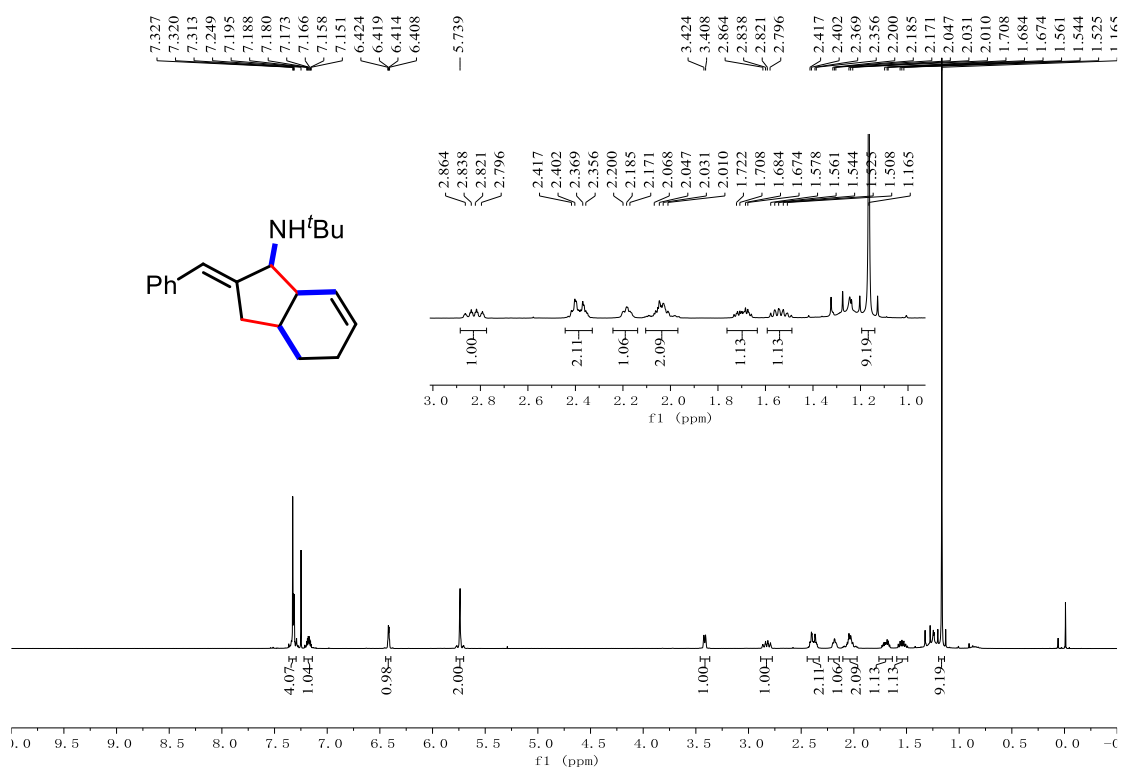

### $^{13}\text{C}$ NMR spectrum of *cis*-3aah (101 MHz, $\text{CDCl}_3$ )

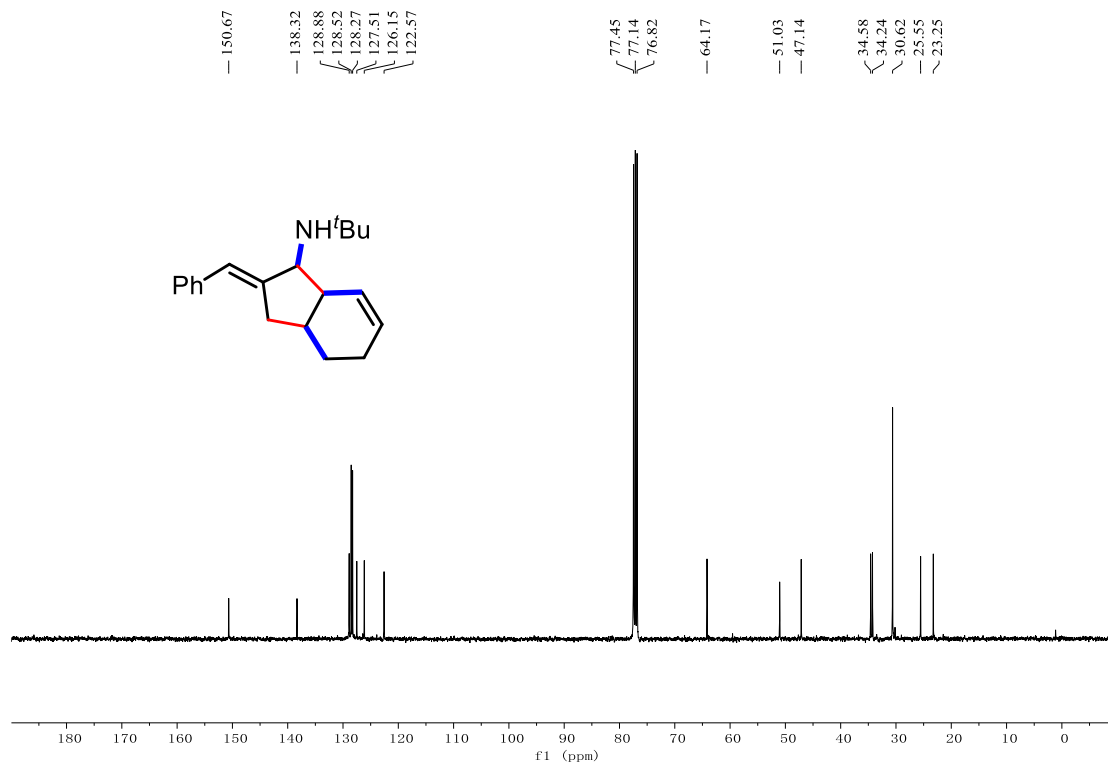

**<sup>1</sup>H NMR spectrum of *cis*-3cac (400 MHz, CDCl<sub>3</sub>)**

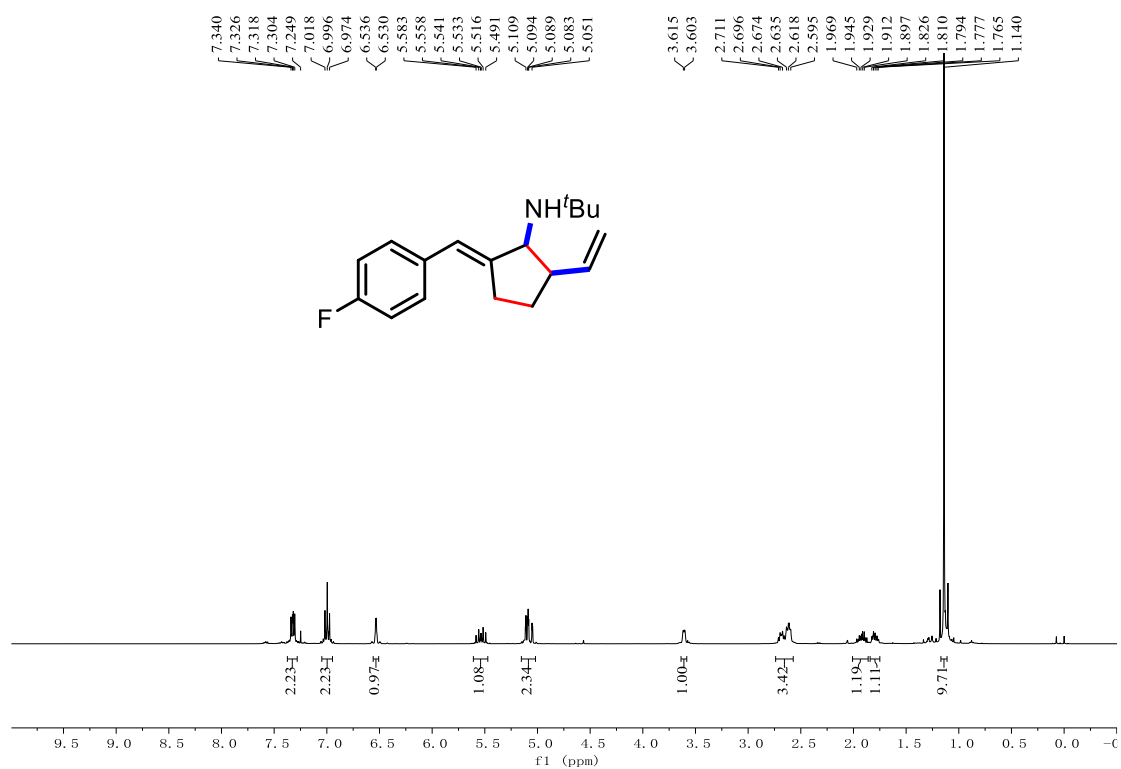

**<sup>13</sup>C NMR spectrum of *cis*-3cac (101 MHz, CDCl<sub>3</sub>)**

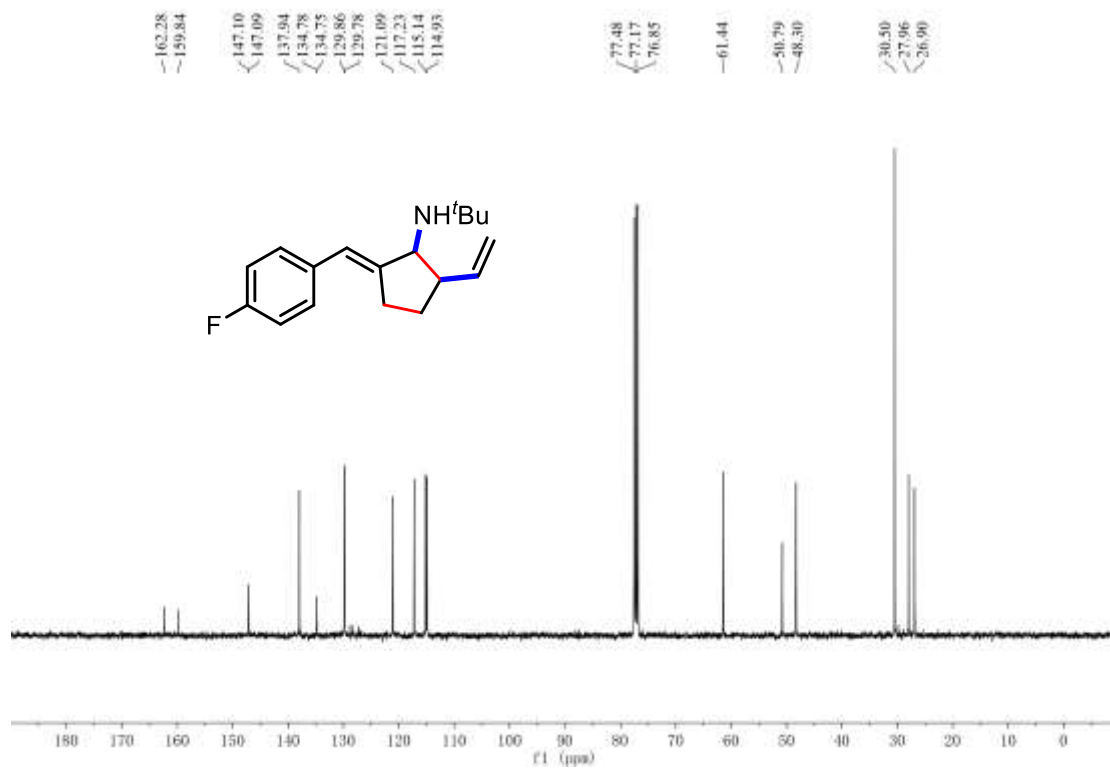

**<sup>1</sup>H NMR spectrum of *cis*-3dac (400 MHz, CDCl<sub>3</sub>)**

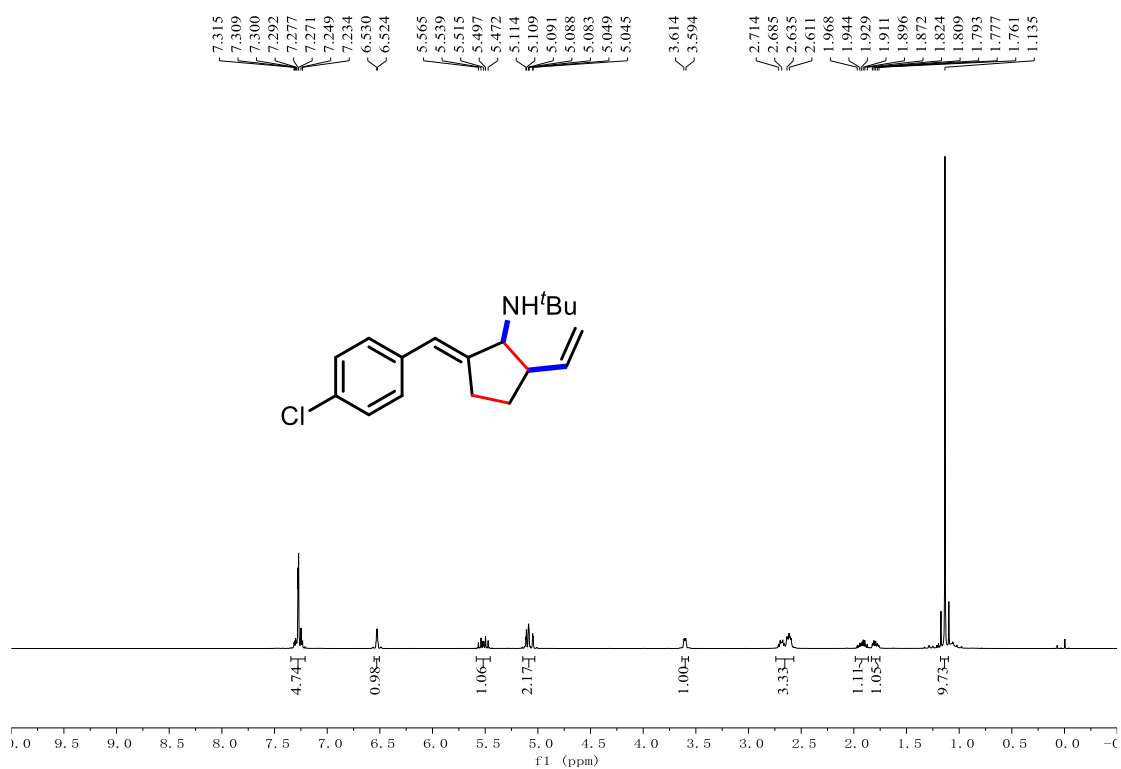

**<sup>13</sup>C NMR spectrum of *cis*-3dac (101 MHz, CDCl<sub>3</sub>)**

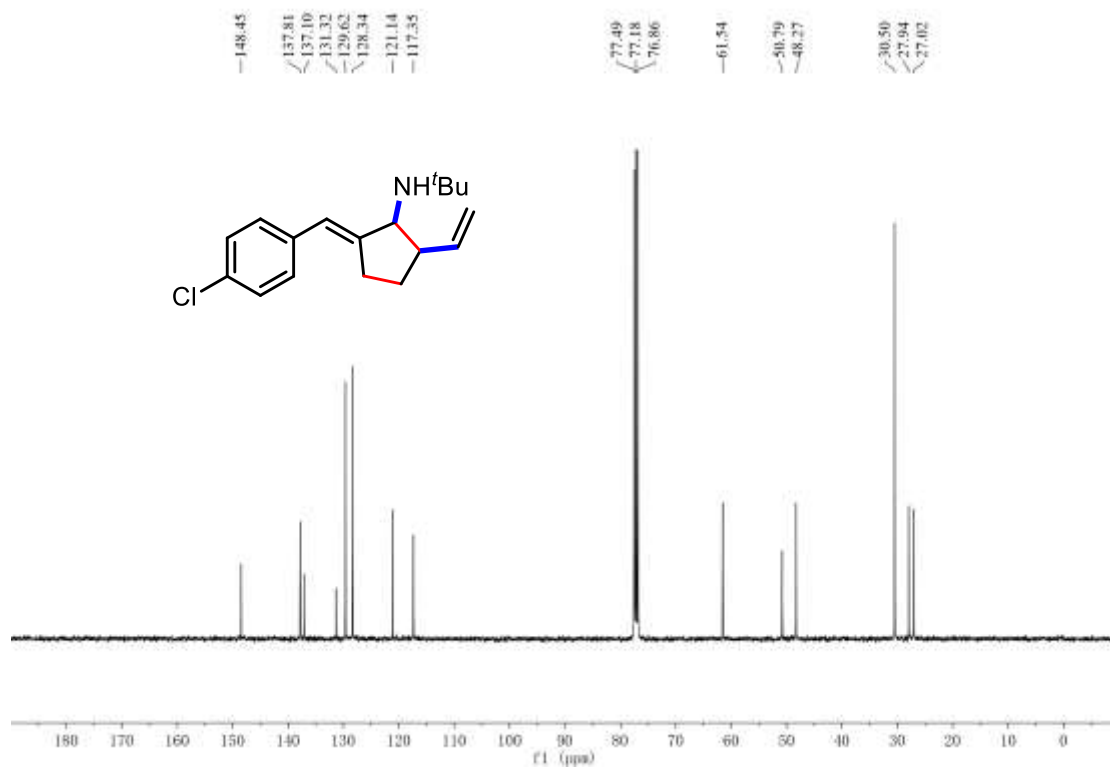

**$^1\text{H}$  NMR spectrum of *trans*-3dac (400 MHz,  $\text{CDCl}_3$ )**

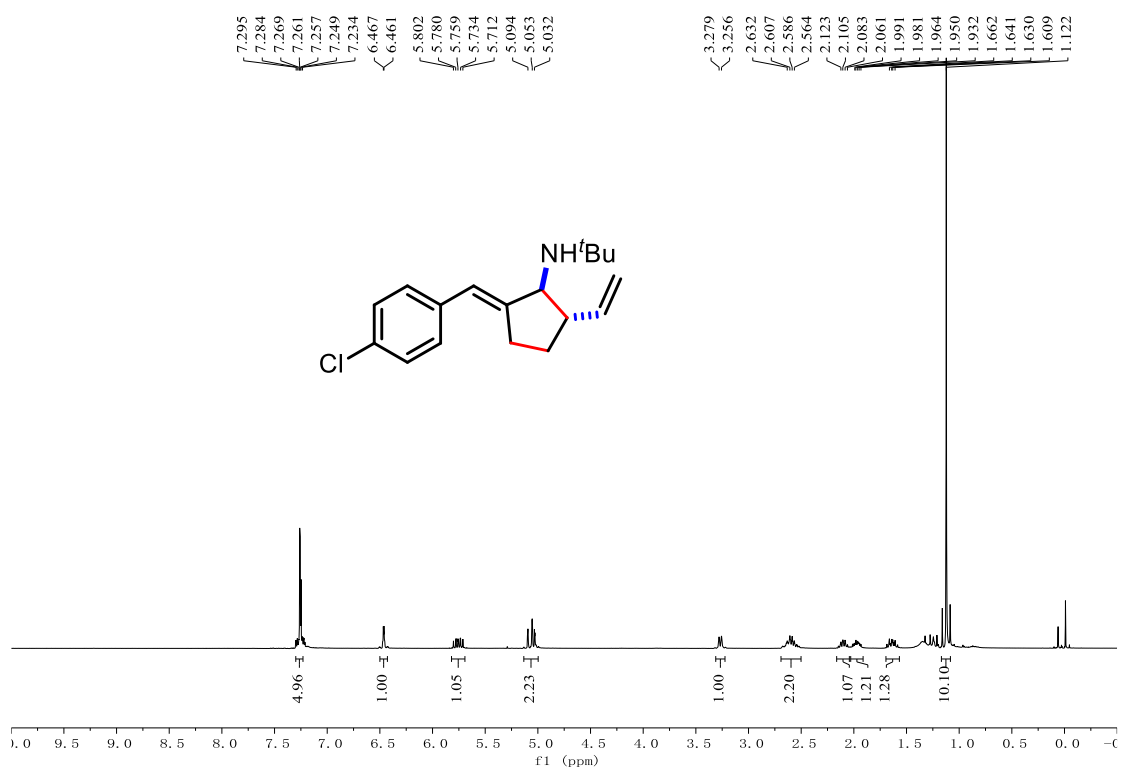

**$^{13}\text{C}$  NMR spectrum of *trans*-3dac (101 MHz,  $\text{CDCl}_3$ )**

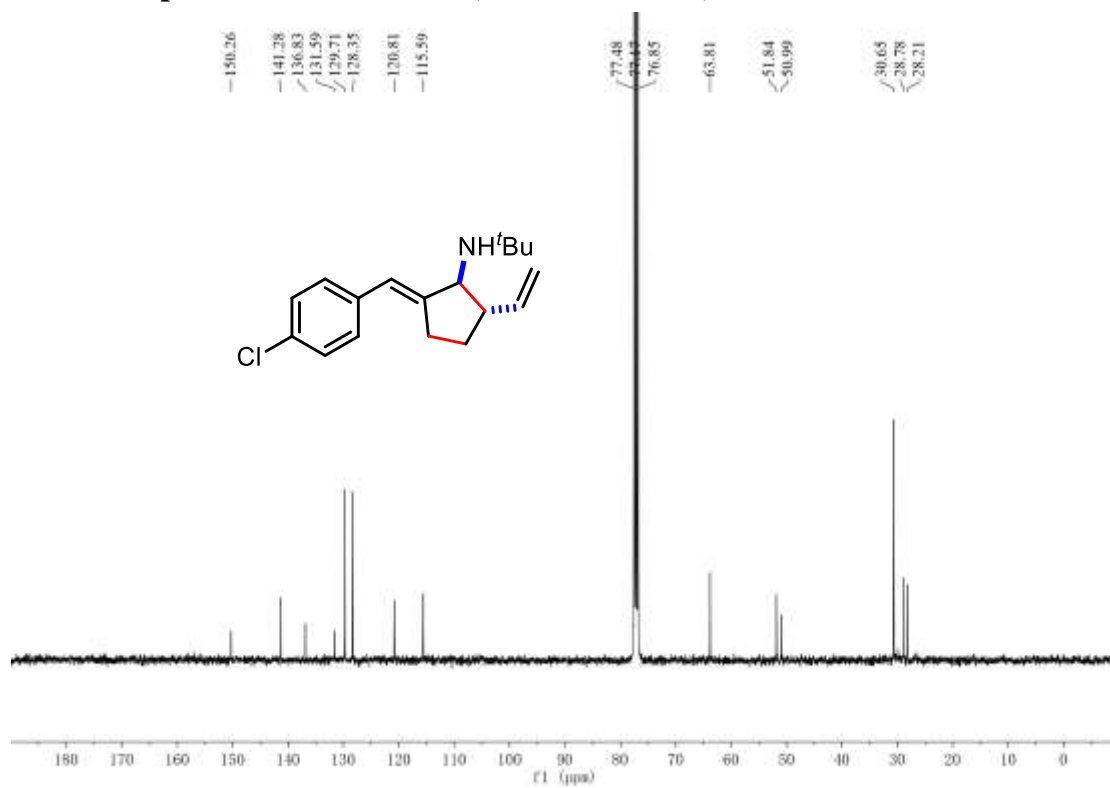

**$^1\text{H}$  NMR spectrum of *cis*-3eac (400 MHz,  $\text{CDCl}_3$ )**

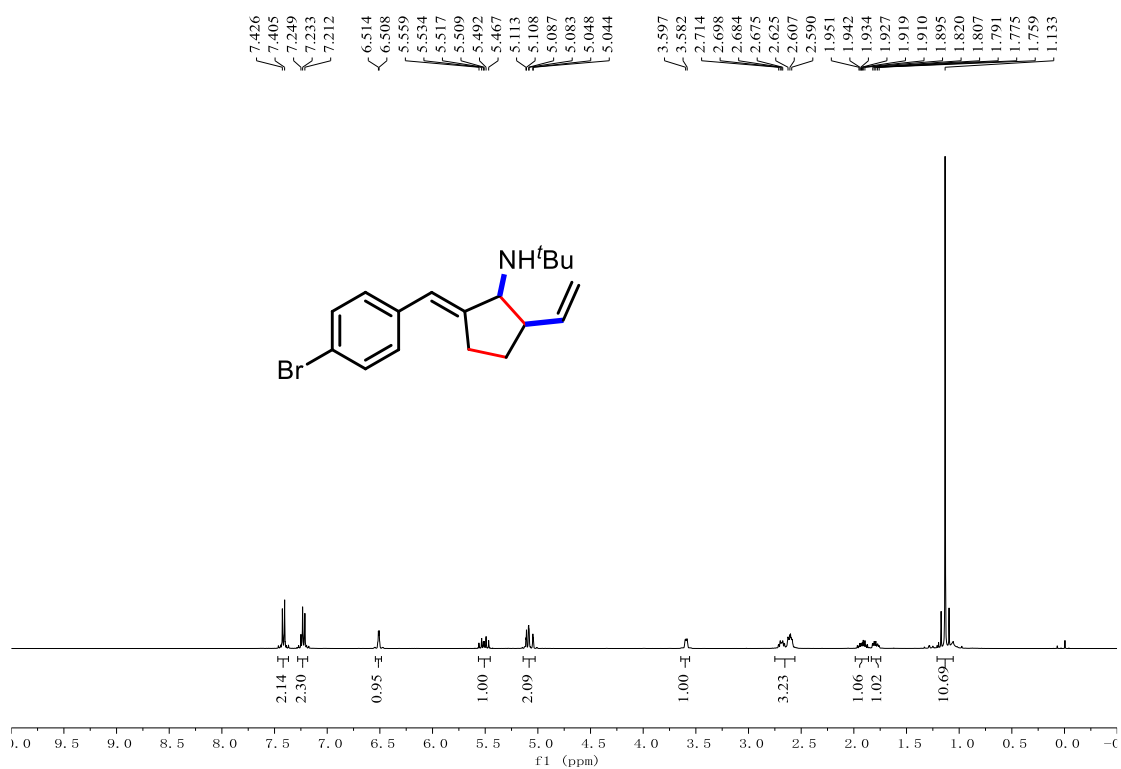

**$^{13}\text{C}$  NMR spectrum of *cis*-3eac (101 MHz,  $\text{CDCl}_3$ )**

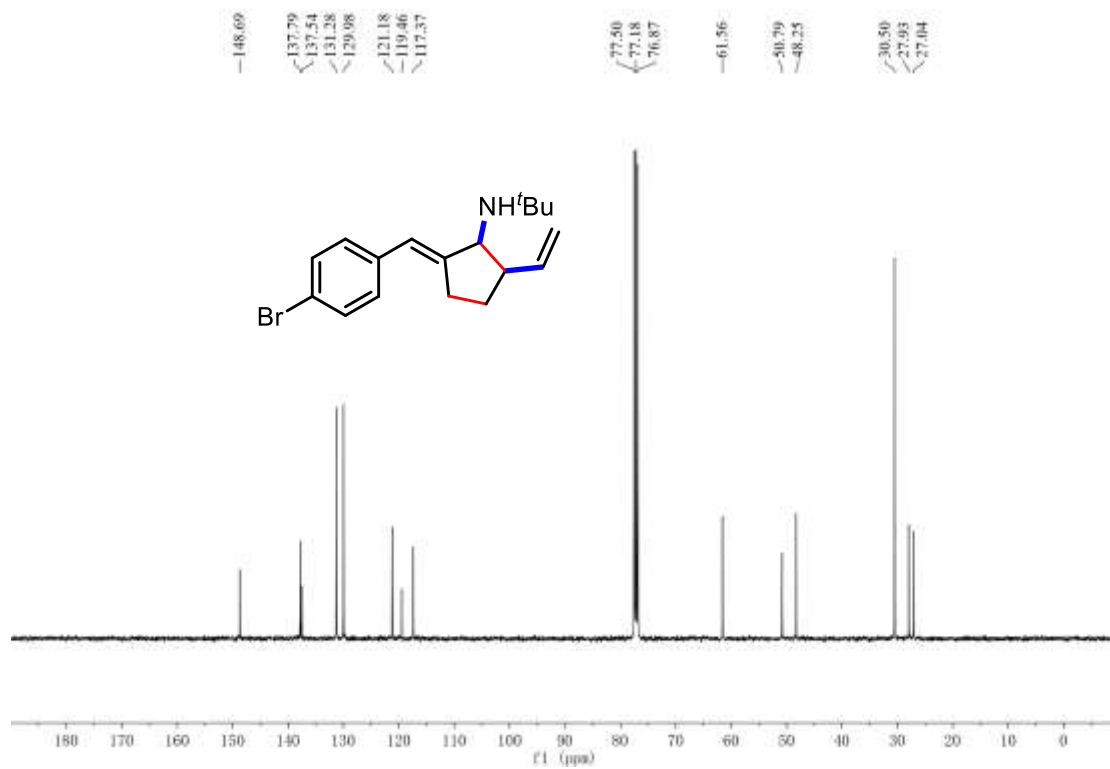

**<sup>1</sup>H NMR spectrum of *trans*-3eac (400 MHz, CDCl<sub>3</sub>)**

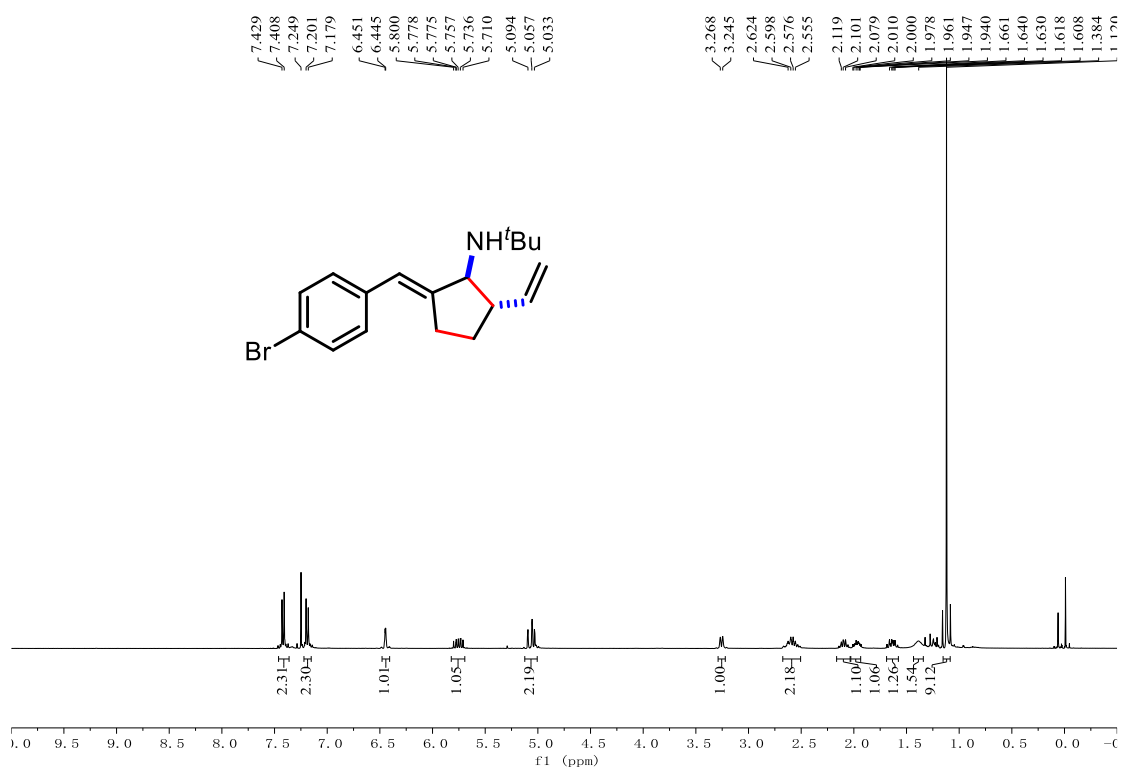

**<sup>13</sup>C NMR spectrum of *trans*-3eac (101 MHz, CDCl<sub>3</sub>)**

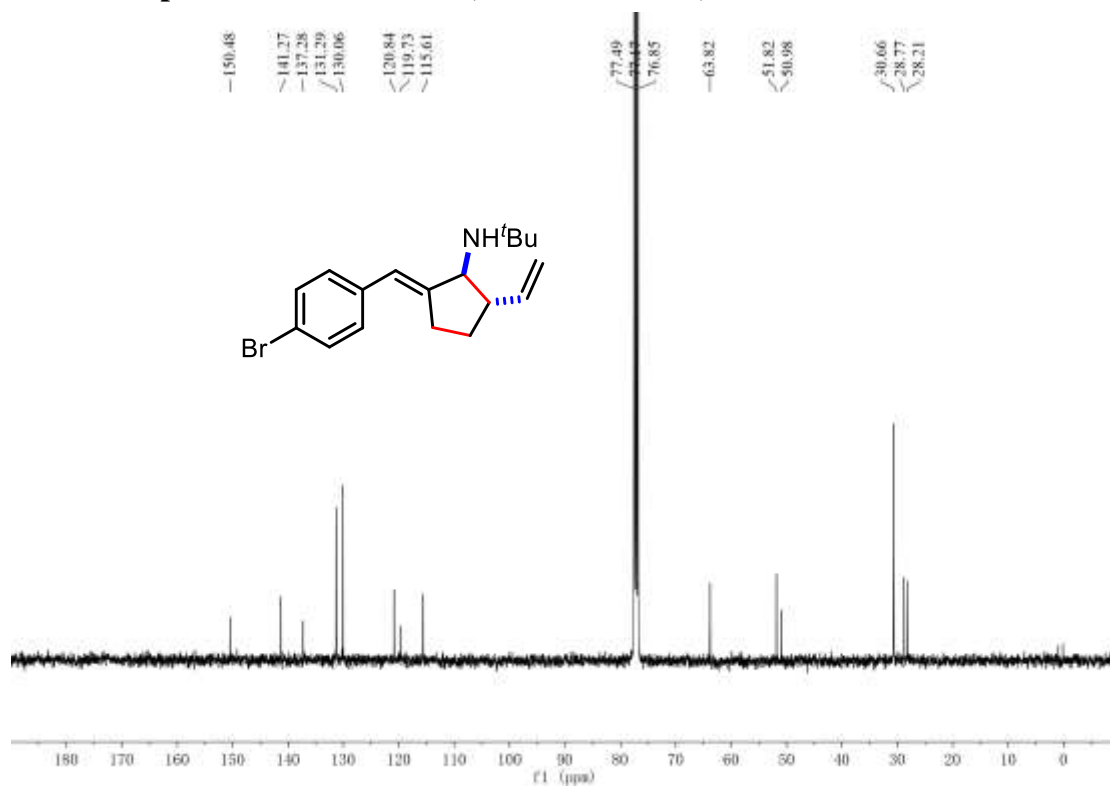

**$^1\text{H}$  NMR spectrum of *cis*-3fac (400 MHz,  $\text{CDCl}_3$ )**

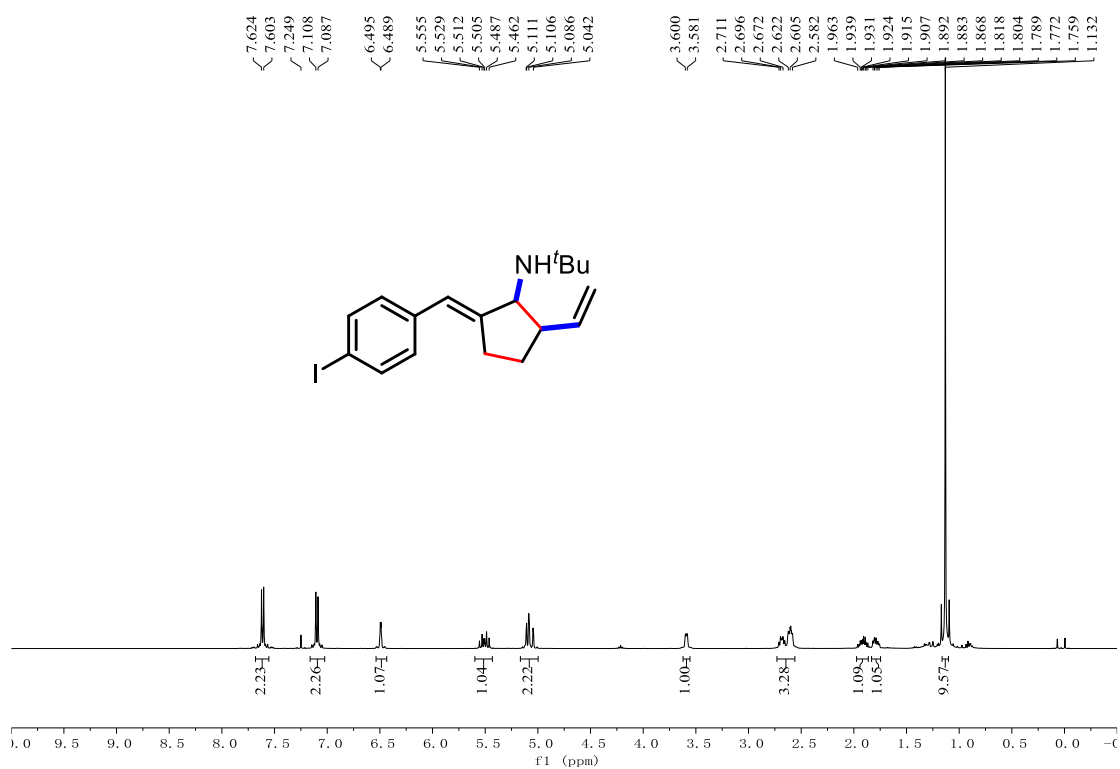

**$^{13}\text{C}$  NMR spectrum of *cis*-3fac (101 MHz,  $\text{CDCl}_3$ )**

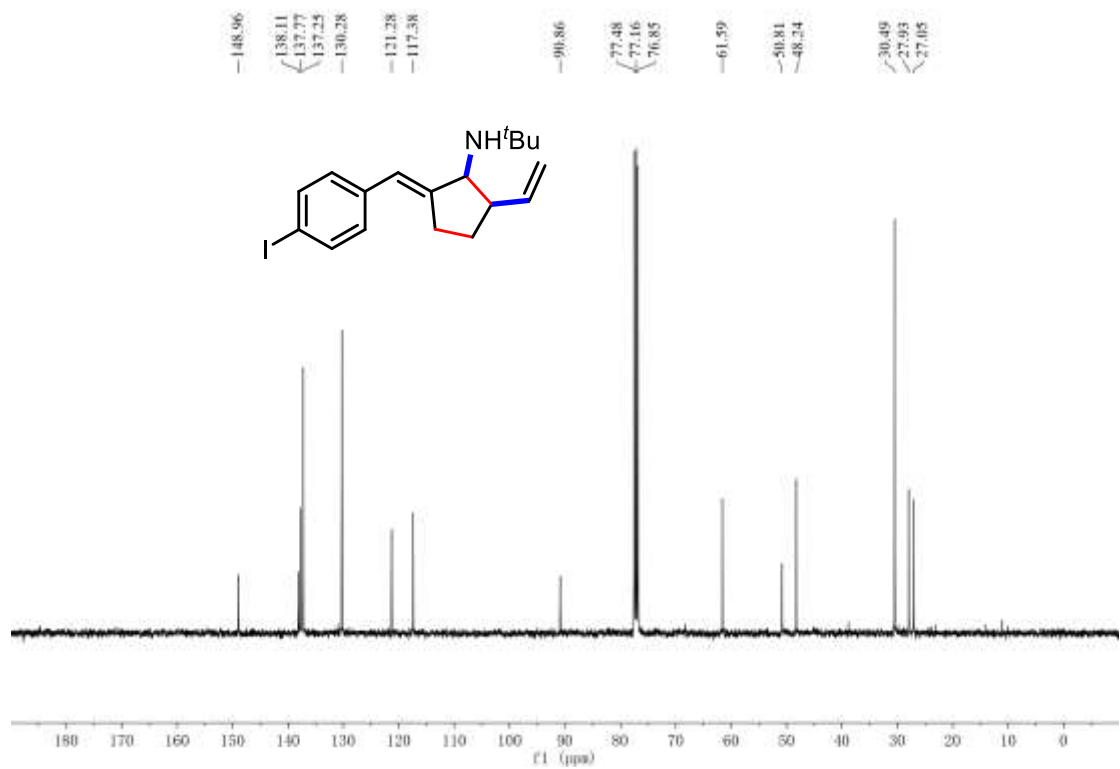

**<sup>1</sup>H NMR spectrum of *trans*-3fac (400 MHz, CDCl<sub>3</sub>)**

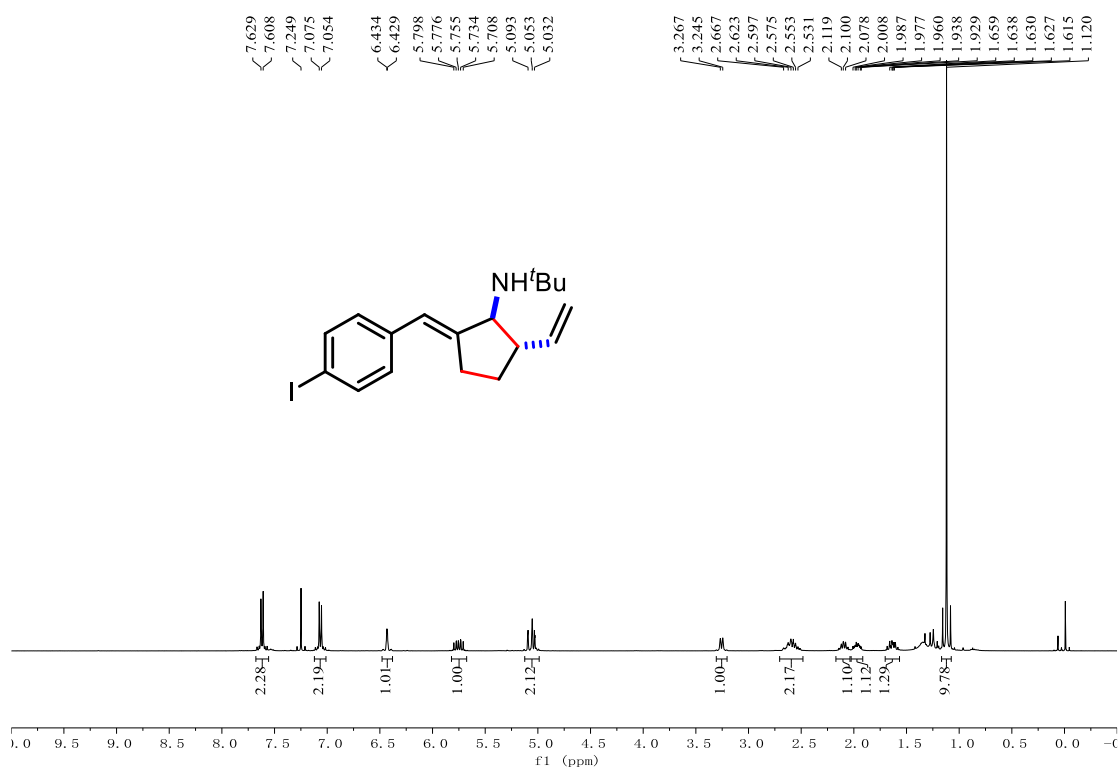

**<sup>13</sup>C NMR spectrum of *trans*-3fac (101 MHz, CDCl<sub>3</sub>)**

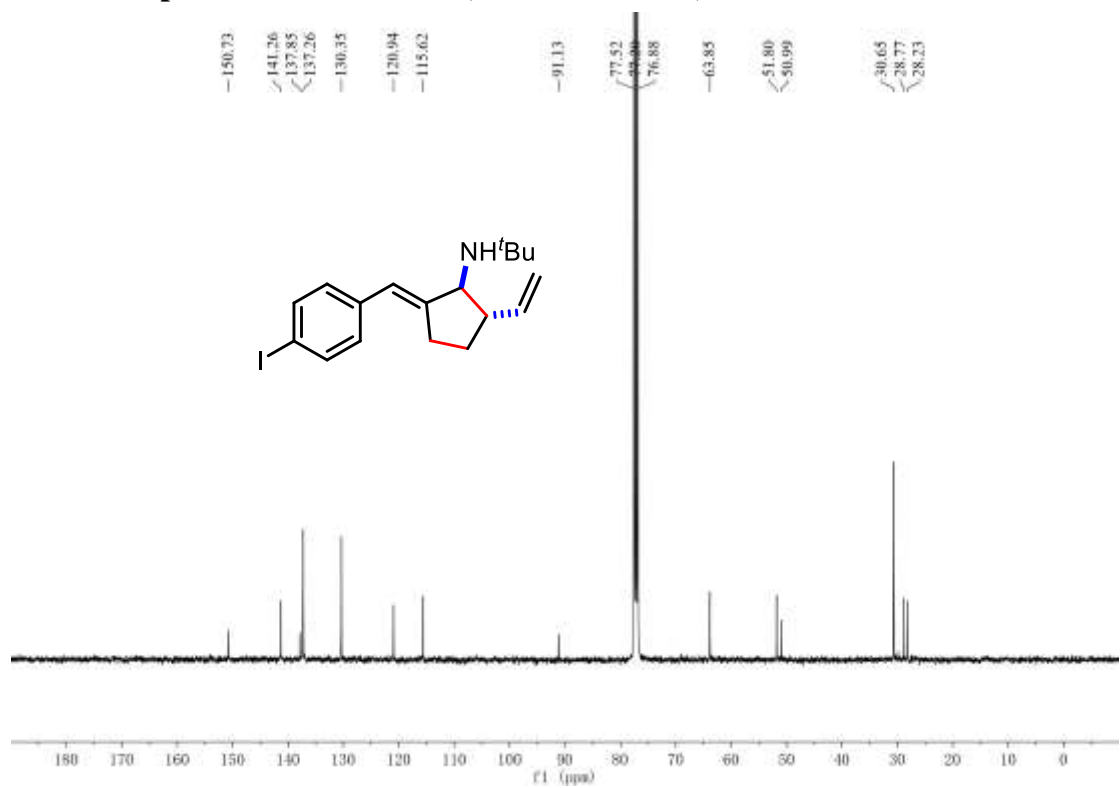

**<sup>1</sup>H NMR spectrum of *cis*-3gac (400 MHz, CDCl<sub>3</sub>)**

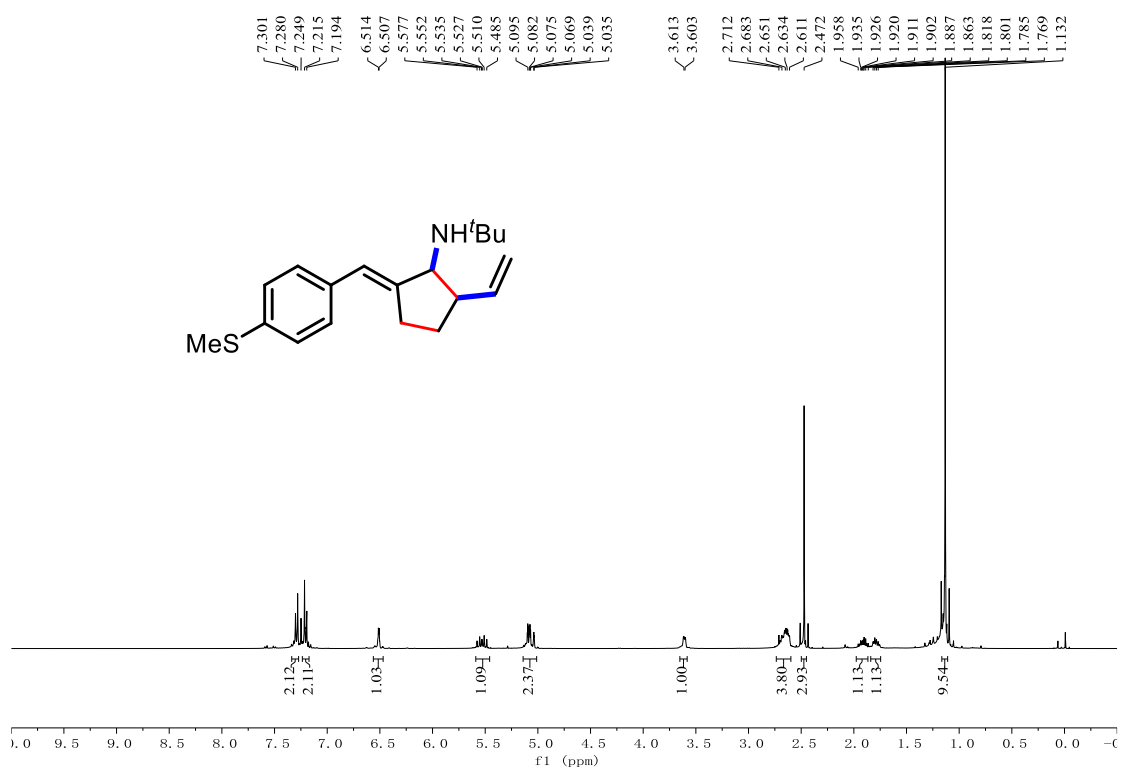

**<sup>13</sup>C NMR spectrum of *cis*-3gac (101 MHz, CDCl<sub>3</sub>)**

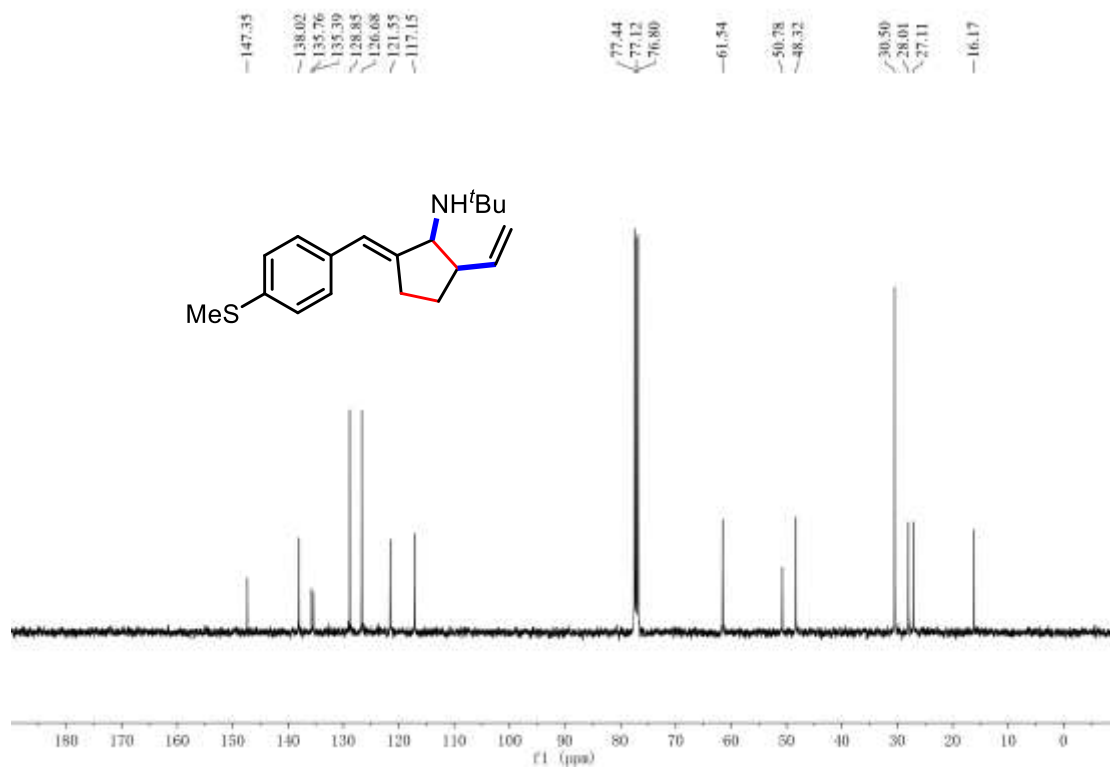

**<sup>1</sup>H NMR spectrum of *trans*-3gac (400 MHz, CDCl<sub>3</sub>)**

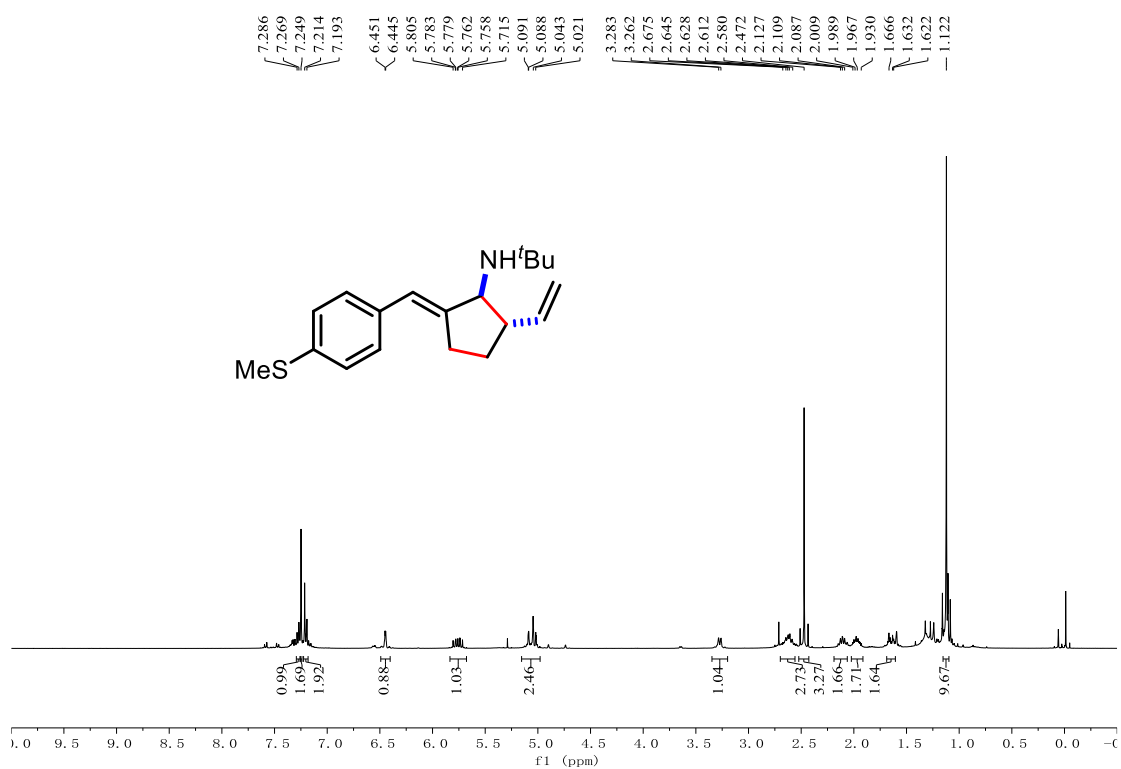

**<sup>13</sup>C NMR spectrum of *trans*-3gac (101 MHz, CDCl<sub>3</sub>)**

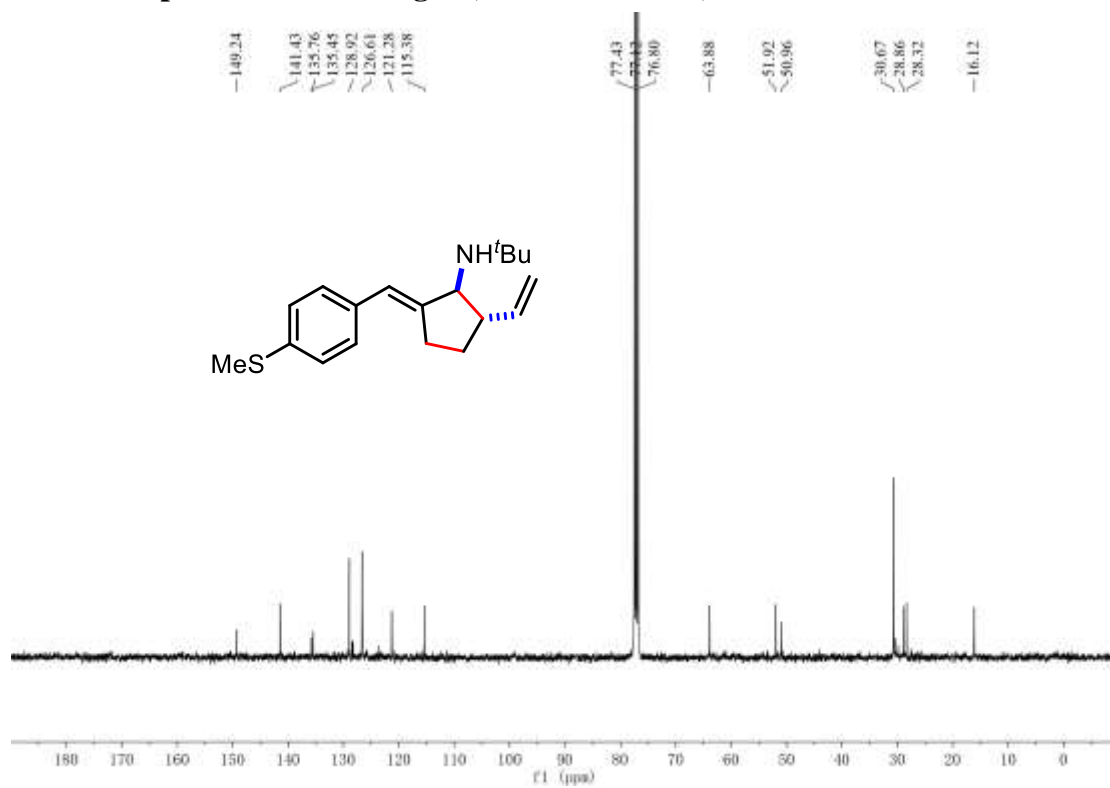

**<sup>1</sup>H NMR spectrum of *cis*-3hac (400 MHz, CDCl<sub>3</sub>)**

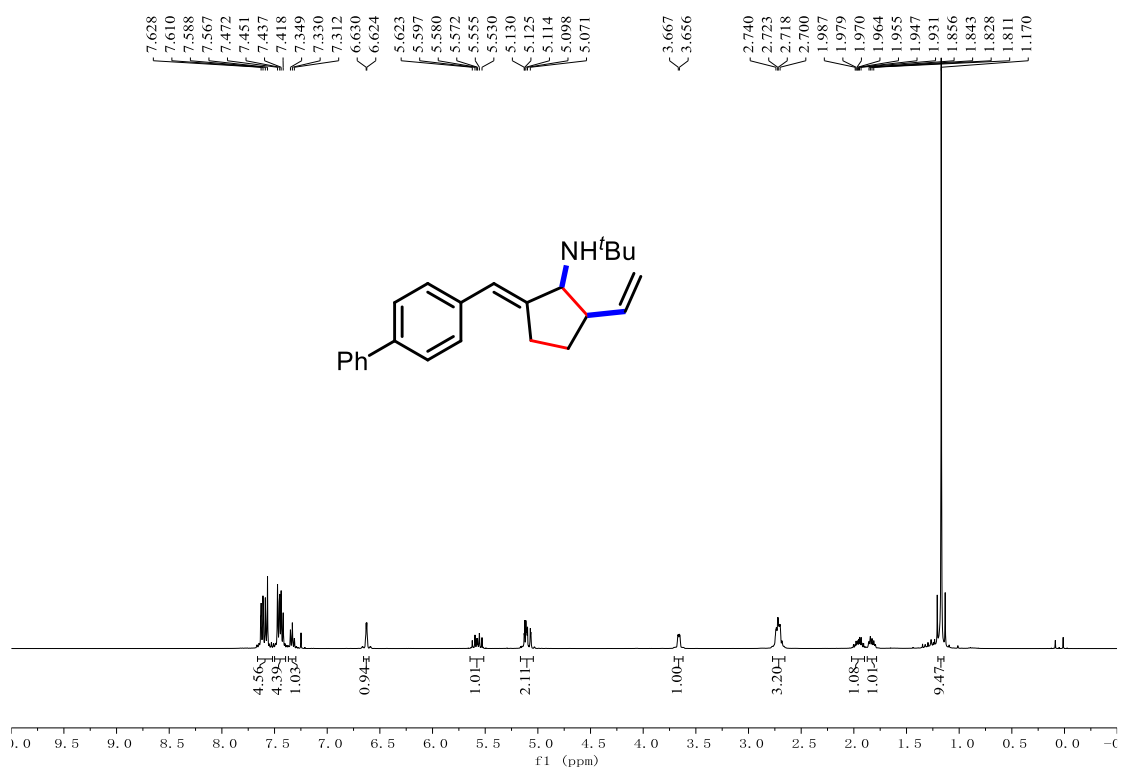

**<sup>13</sup>C NMR spectrum of *cis*-3hac (101 MHz, CDCl<sub>3</sub>)**

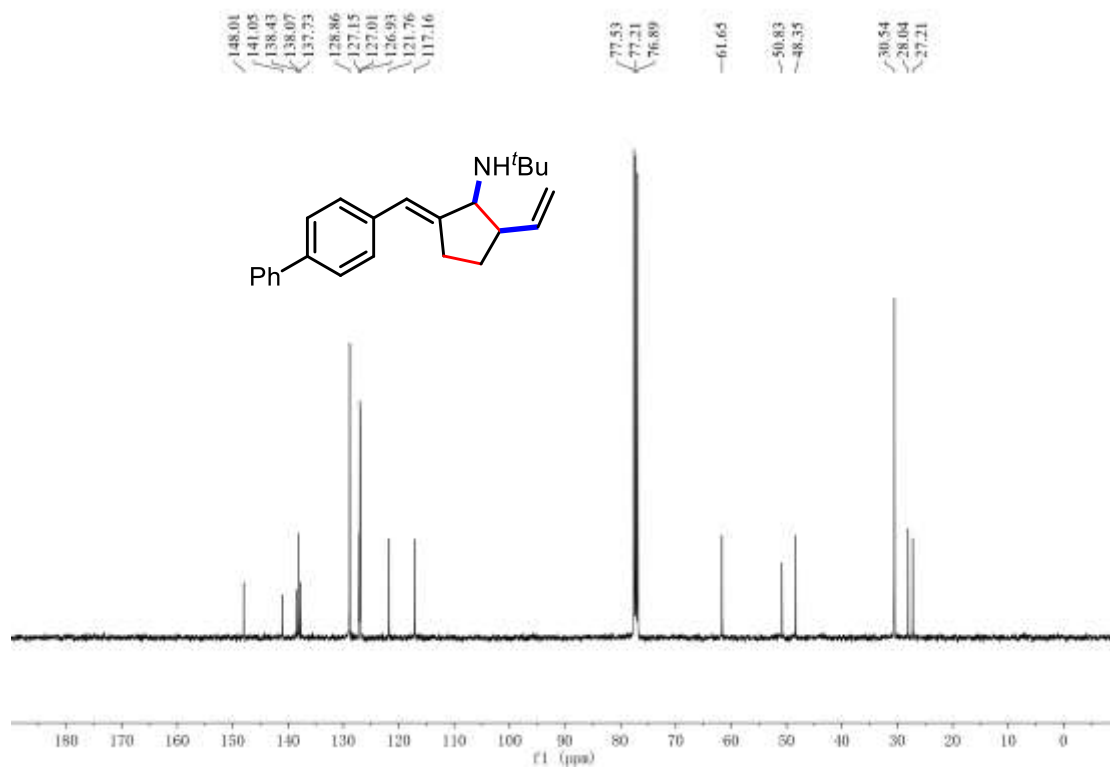

**$^1\text{H}$  NMR spectrum of *trans*-3hac (400 MHz,  $\text{CDCl}_3$ )**

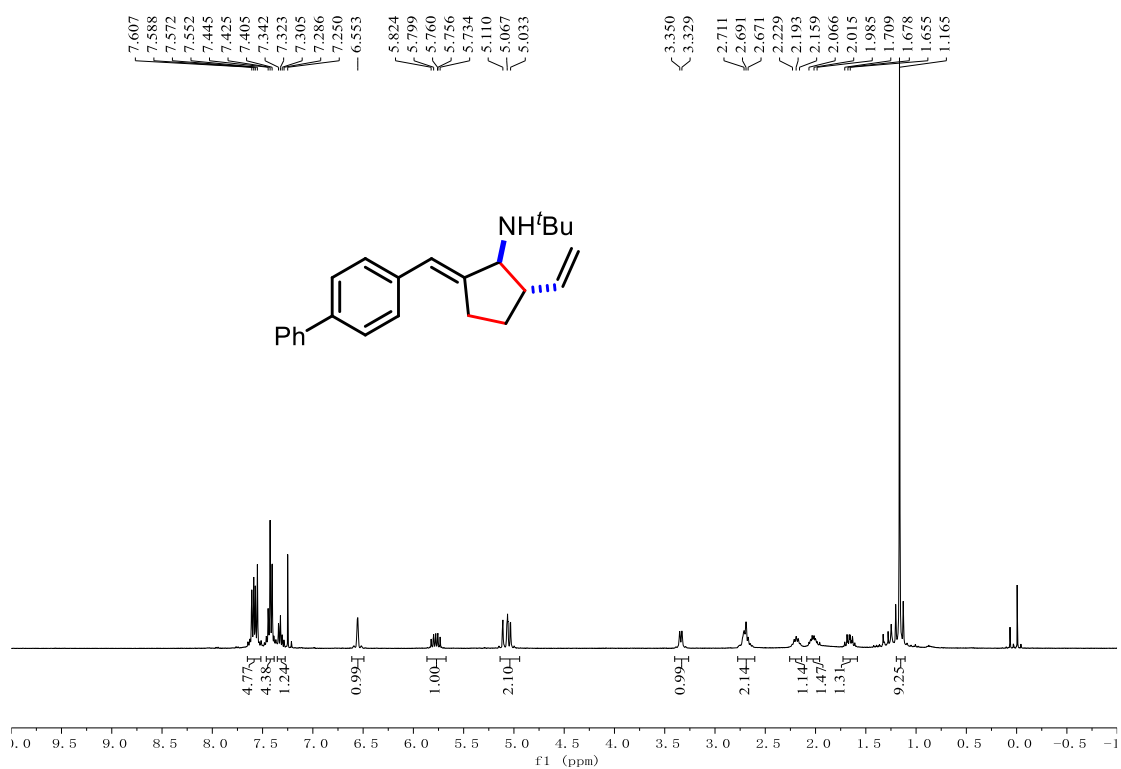

**$^{13}\text{C}$  NMR spectrum of *trans*-3hac (101 MHz,  $\text{CDCl}_3$ )**

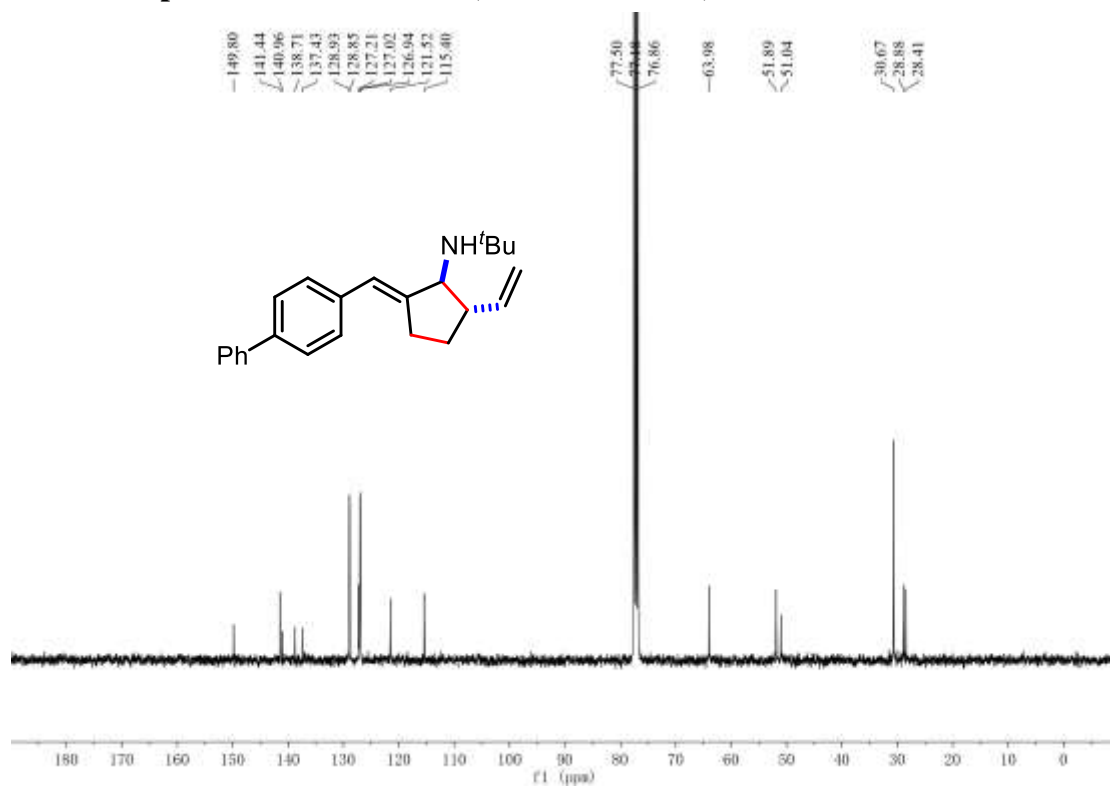

**<sup>1</sup>H NMR spectrum of *cis*-3kac (400 MHz, CDCl<sub>3</sub>)**

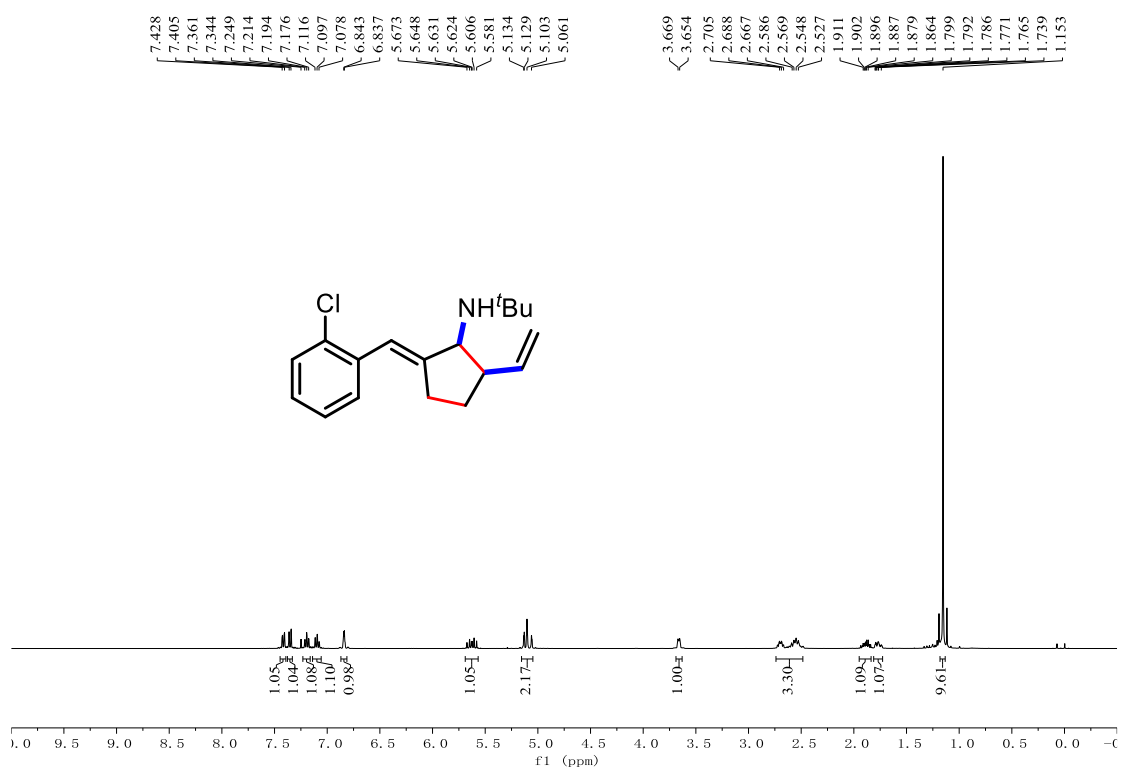

**<sup>13</sup>C NMR spectrum of *cis*-3kac (101 MHz, CDCl<sub>3</sub>)**

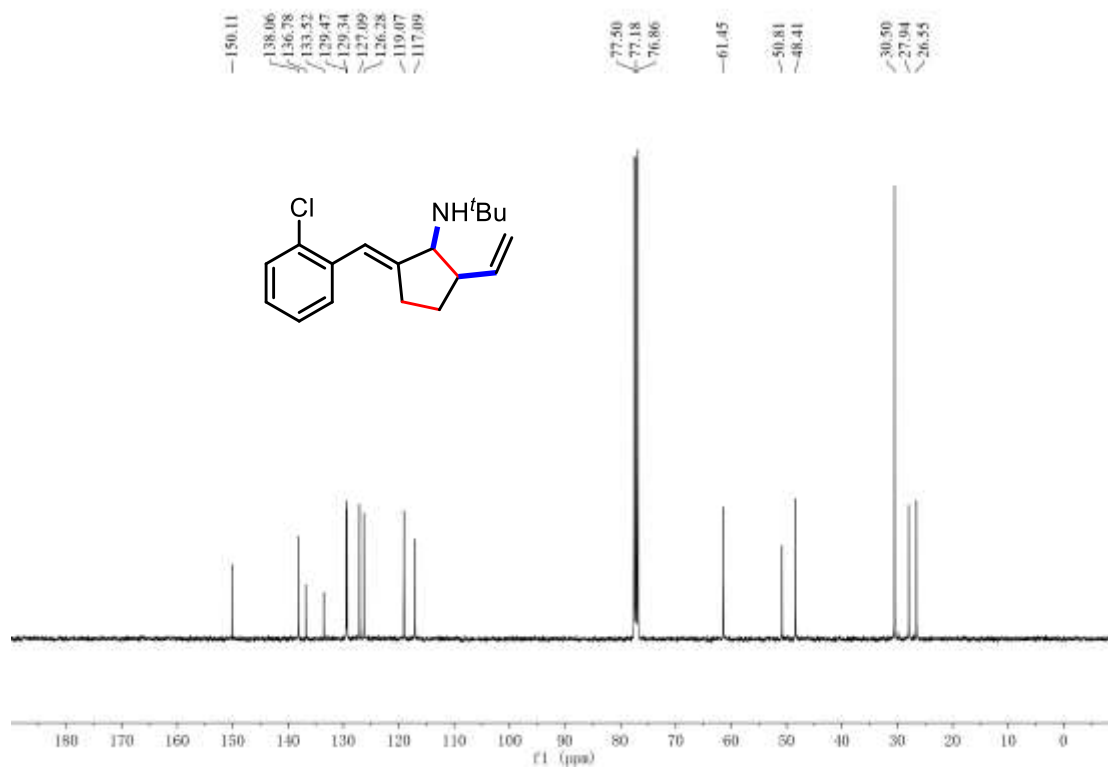

**<sup>1</sup>H NMR spectrum of *trans*-3kac (400 MHz, CDCl<sub>3</sub>)**

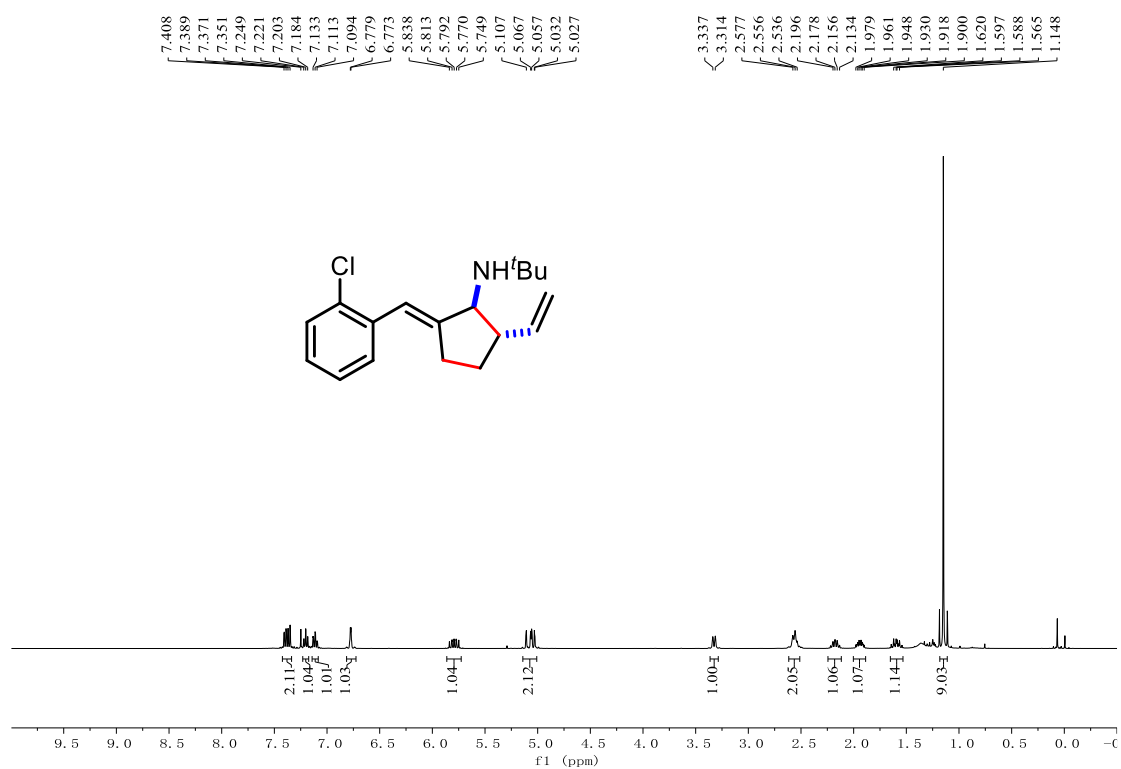

**<sup>13</sup>C NMR spectrum of *trans*-3kac (101 MHz, CDCl<sub>3</sub>)**

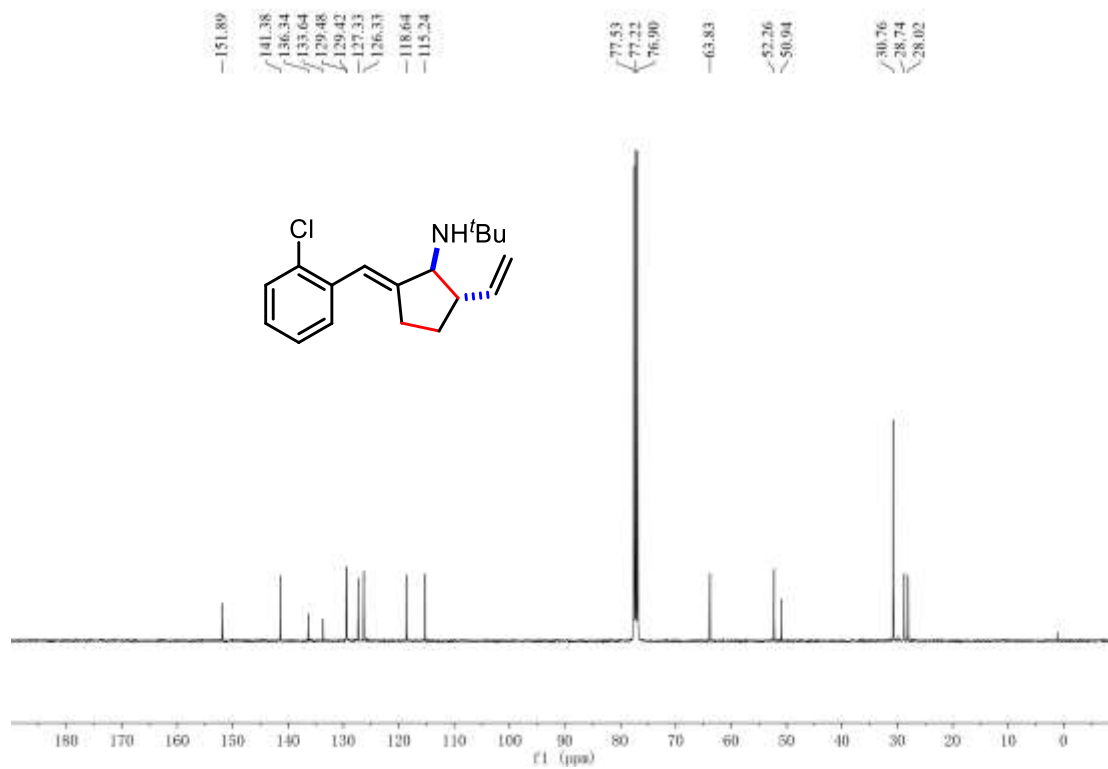

### $^1\text{H}$ NMR spectrum of *cis*-3mac (400 MHz, $\text{CDCl}_3$ )

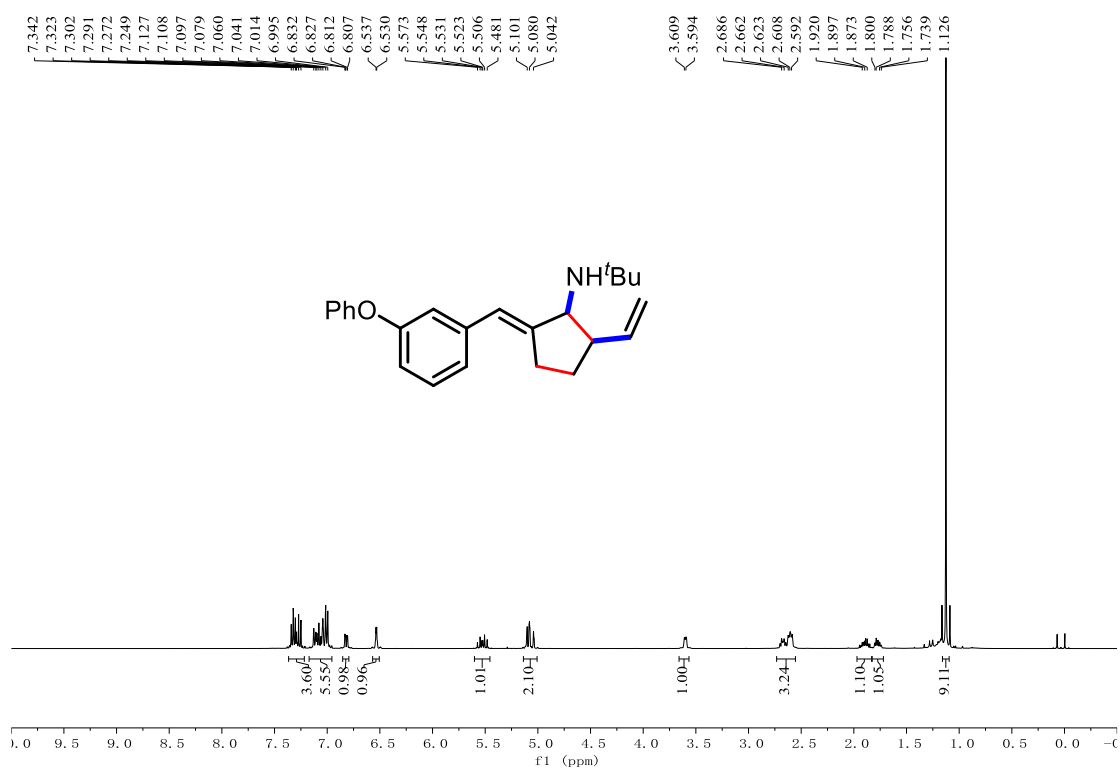

### $^{13}\text{C}$ NMR spectrum of *cis*-3mac (101 MHz, $\text{CDCl}_3$ )

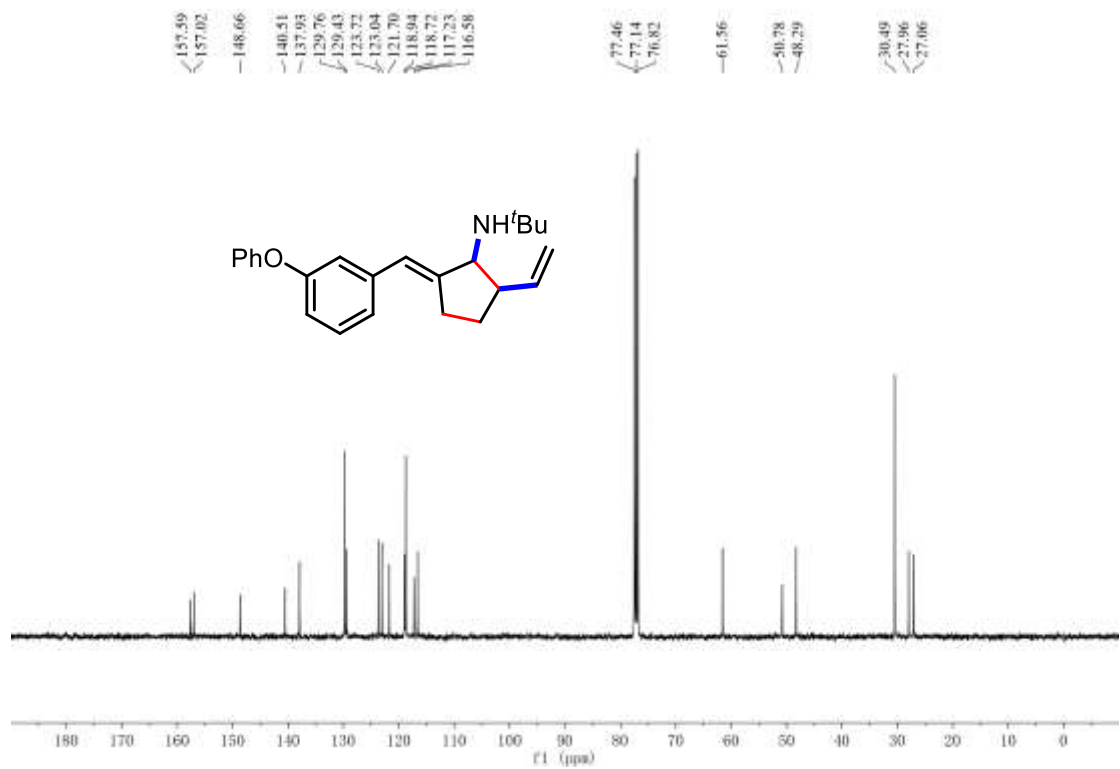

**<sup>1</sup>H NMR spectrum of *trans*-3mac (400 MHz, CDCl<sub>3</sub>)**

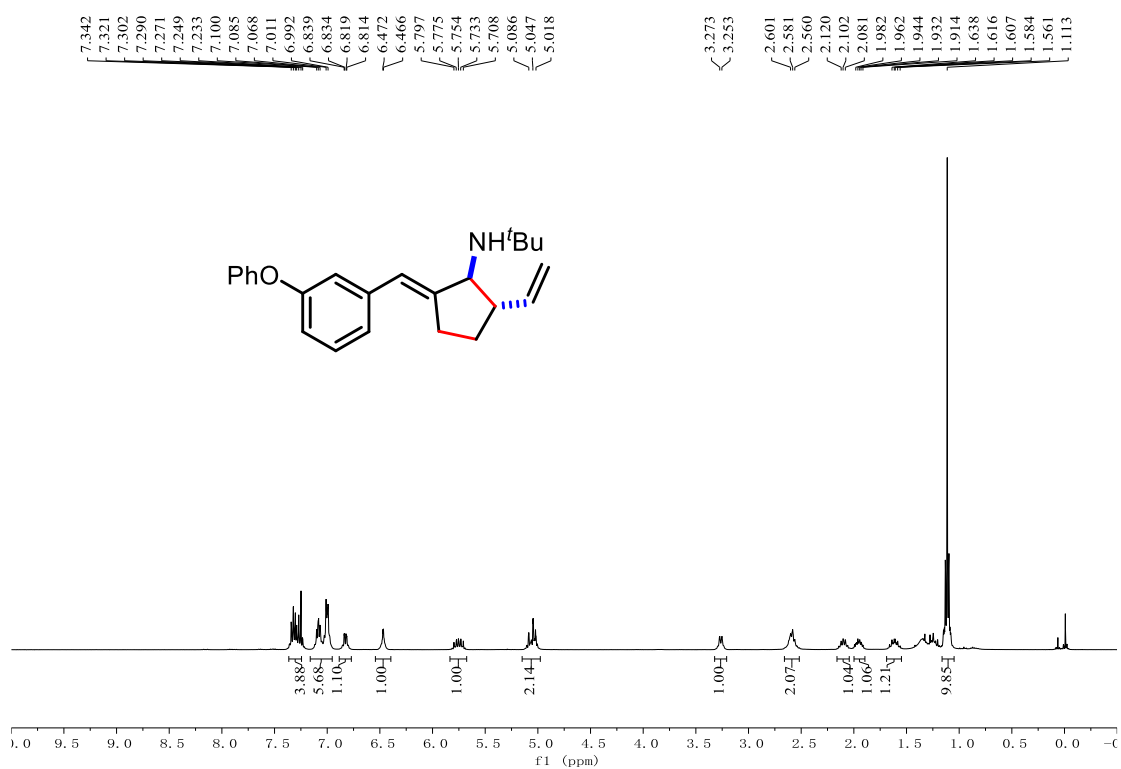

**<sup>13</sup>C NMR spectrum of *trans*-3mac (101 MHz, CDCl<sub>3</sub>)**

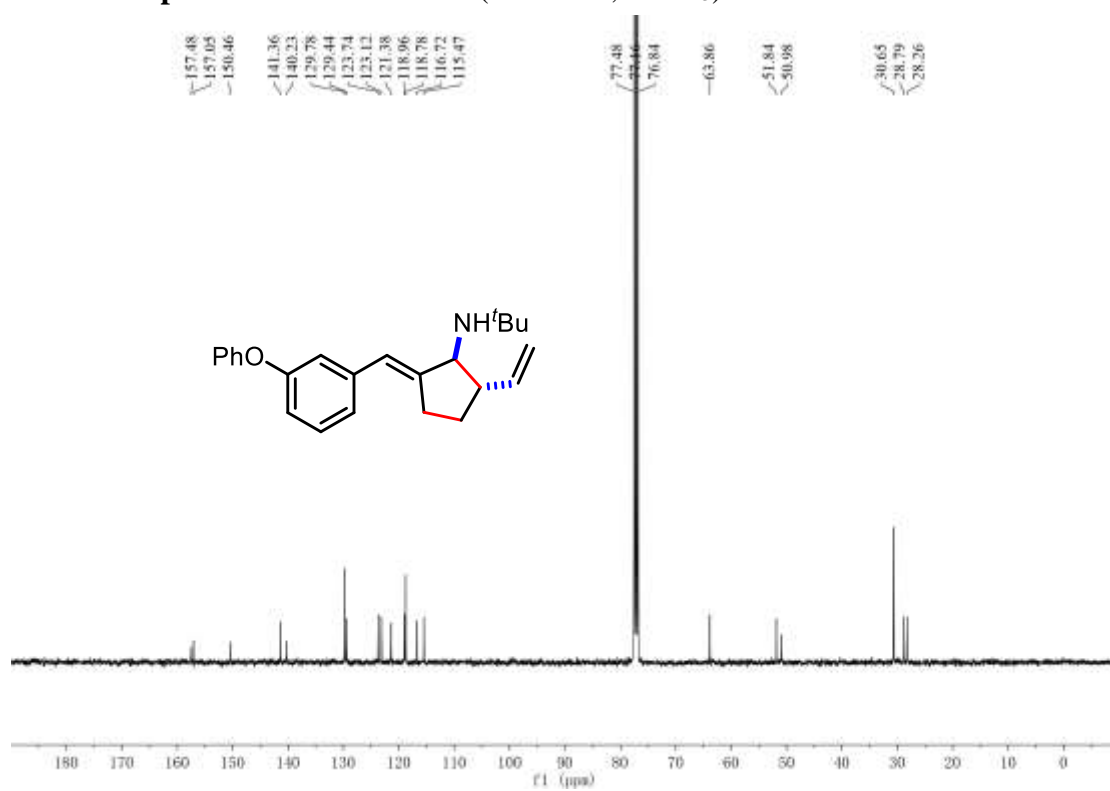

**<sup>1</sup>H NMR spectrum of *cis*-3nac (400 MHz, CDCl<sub>3</sub>)**

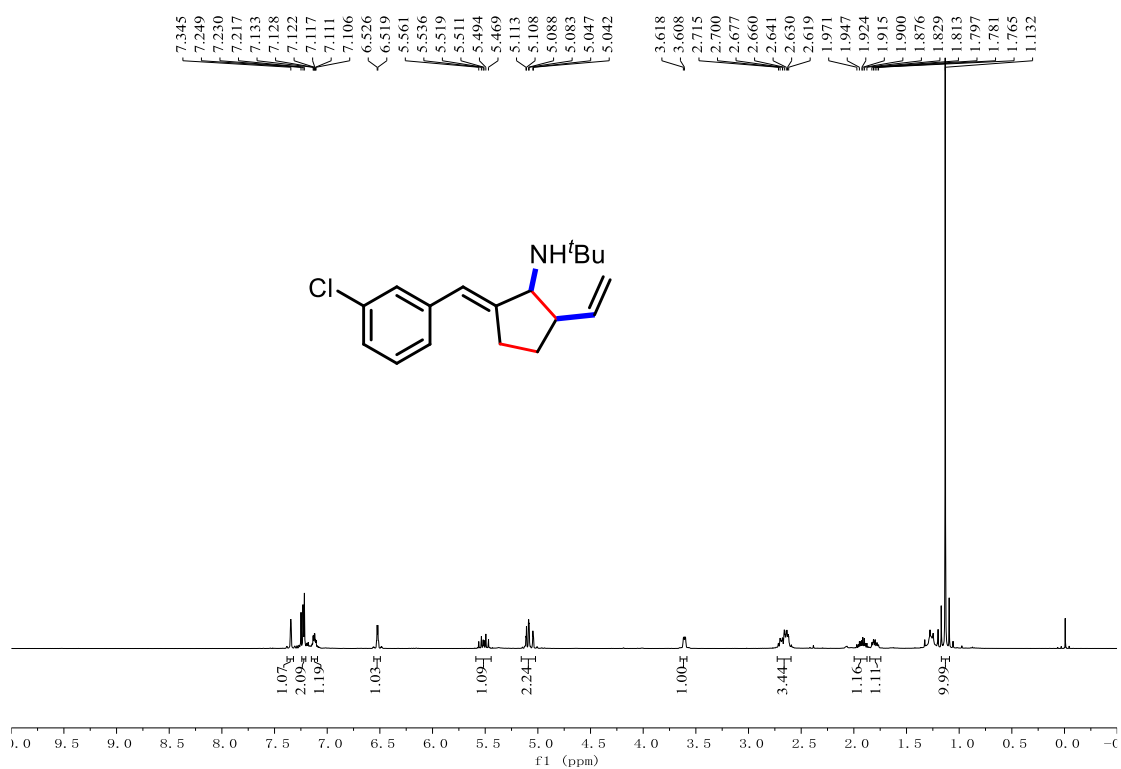

**<sup>13</sup>C NMR spectrum of *cis*-3nac (101 MHz, CDCl<sub>3</sub>)**

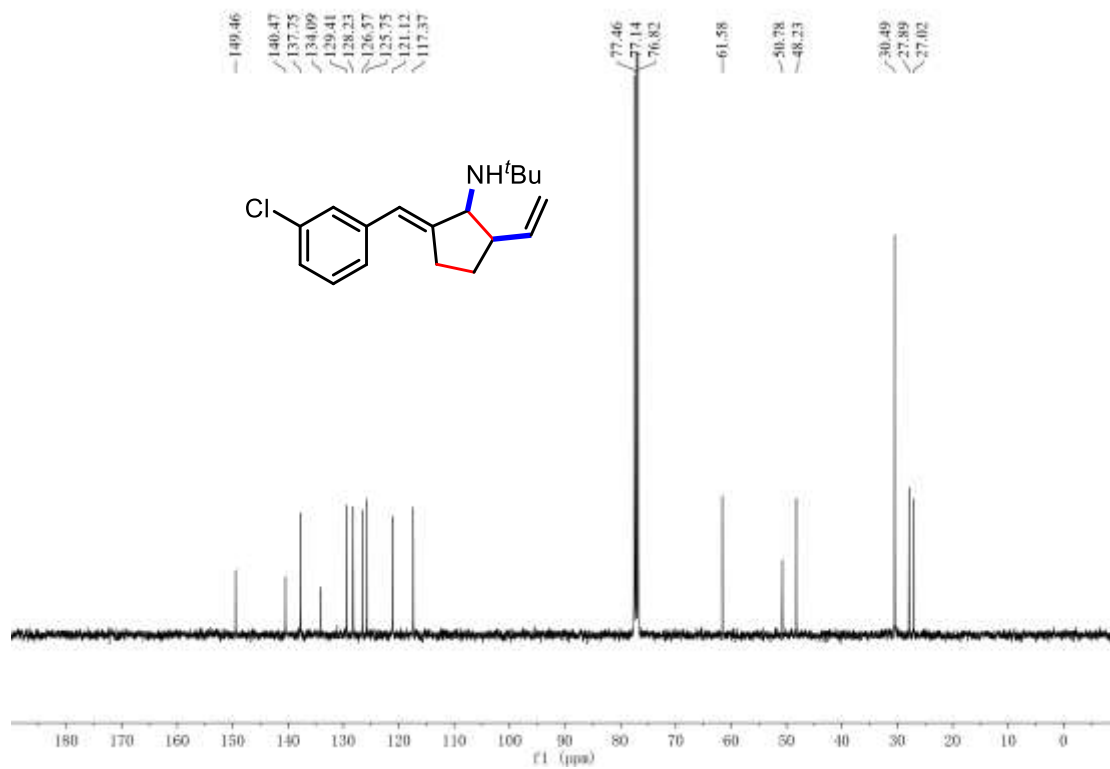

**$^1\text{H}$  NMR spectrum of *trans*-3nac (400 MHz,  $\text{CDCl}_3$ )**

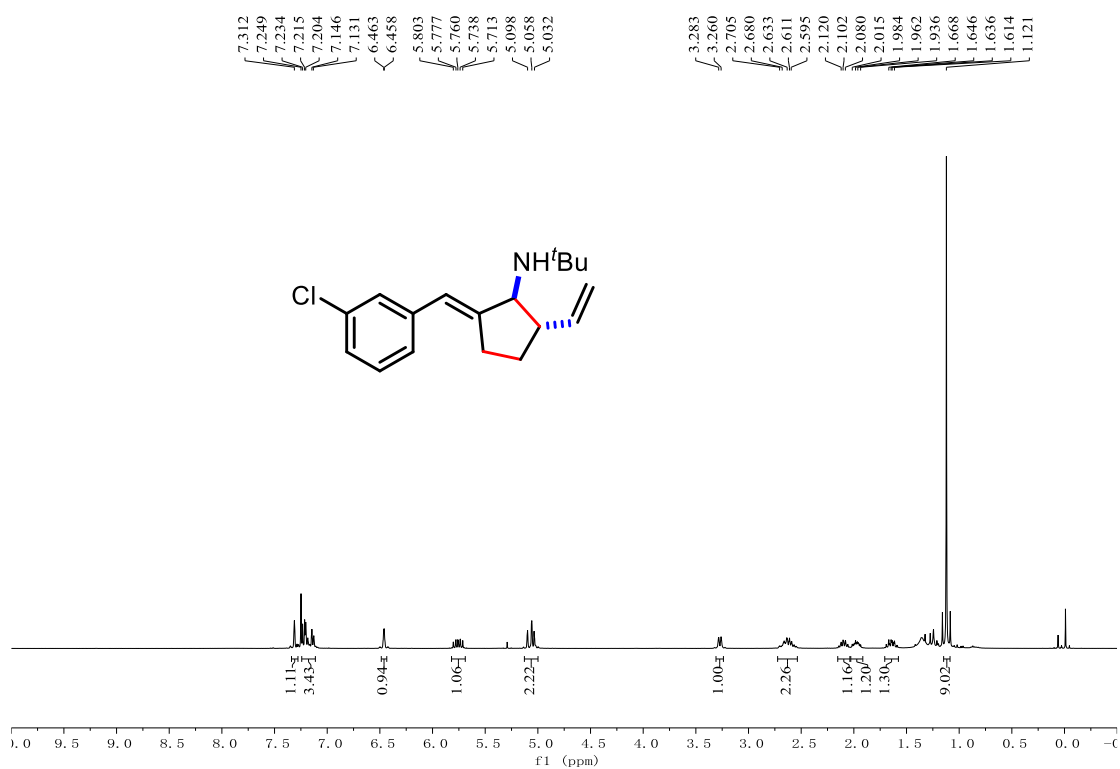

**$^{13}\text{C}$  NMR spectrum of *trans*-3nac (101 MHz,  $\text{CDCl}_3$ )**

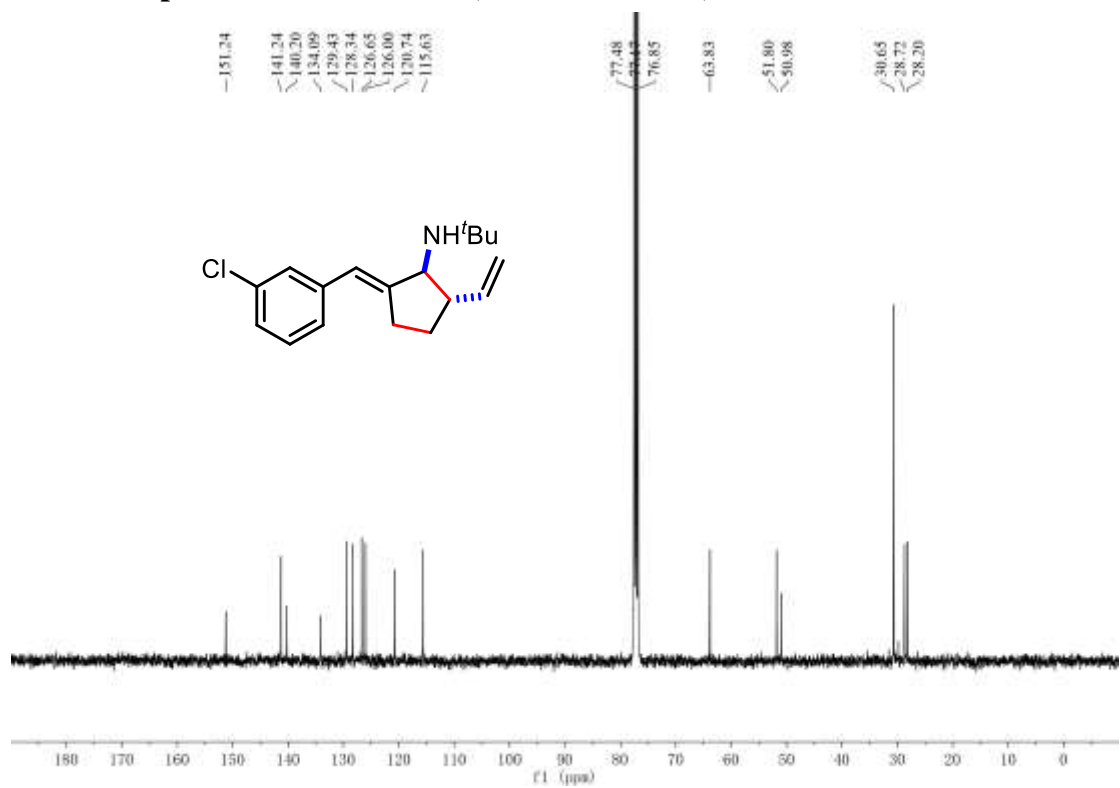

**<sup>1</sup>H NMR spectrum of *cis*-3oac (400 MHz, CDCl<sub>3</sub>)**

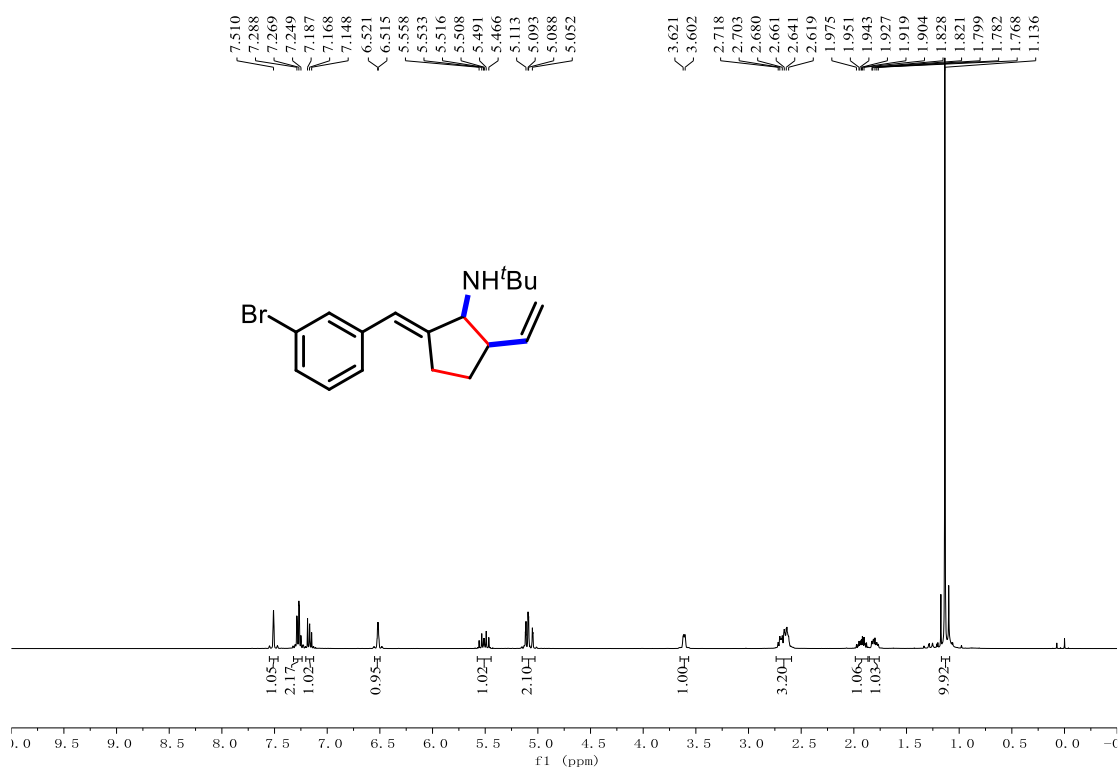

**<sup>13</sup>C NMR spectrum of *cis*-3oac (101 MHz, CDCl<sub>3</sub>)**

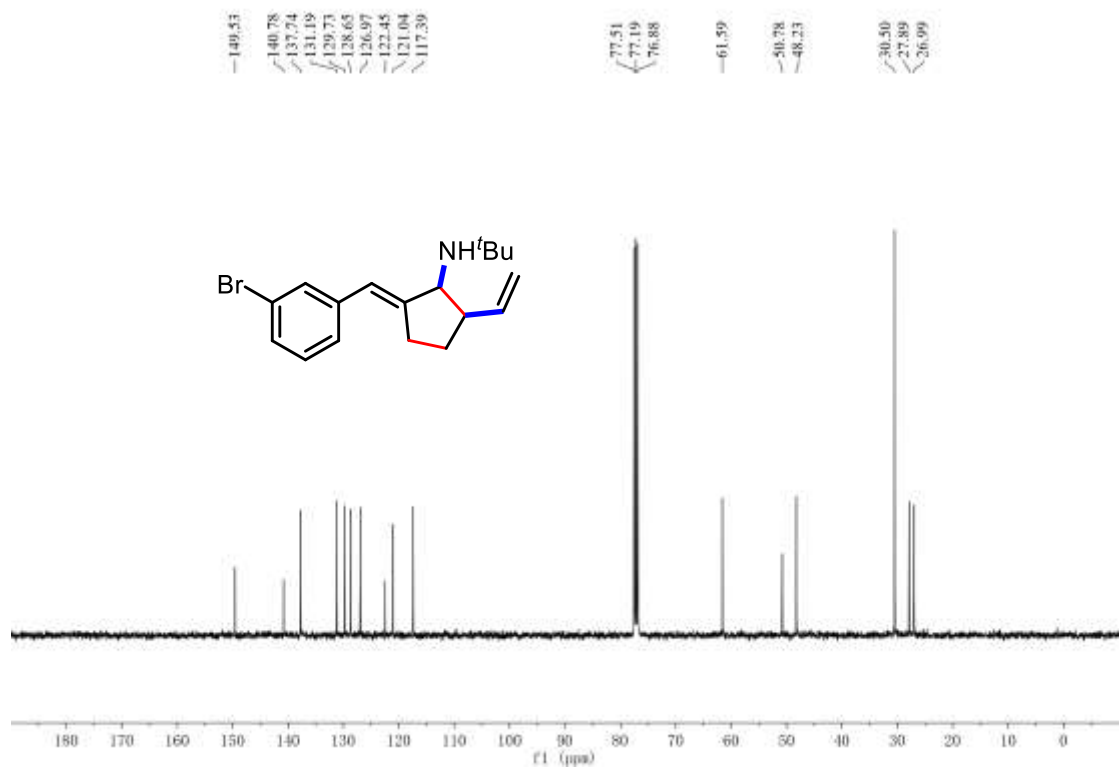

**$^1\text{H}$  NMR spectrum of *trans*-3oac (400 MHz,  $\text{CDCl}_3$ )**

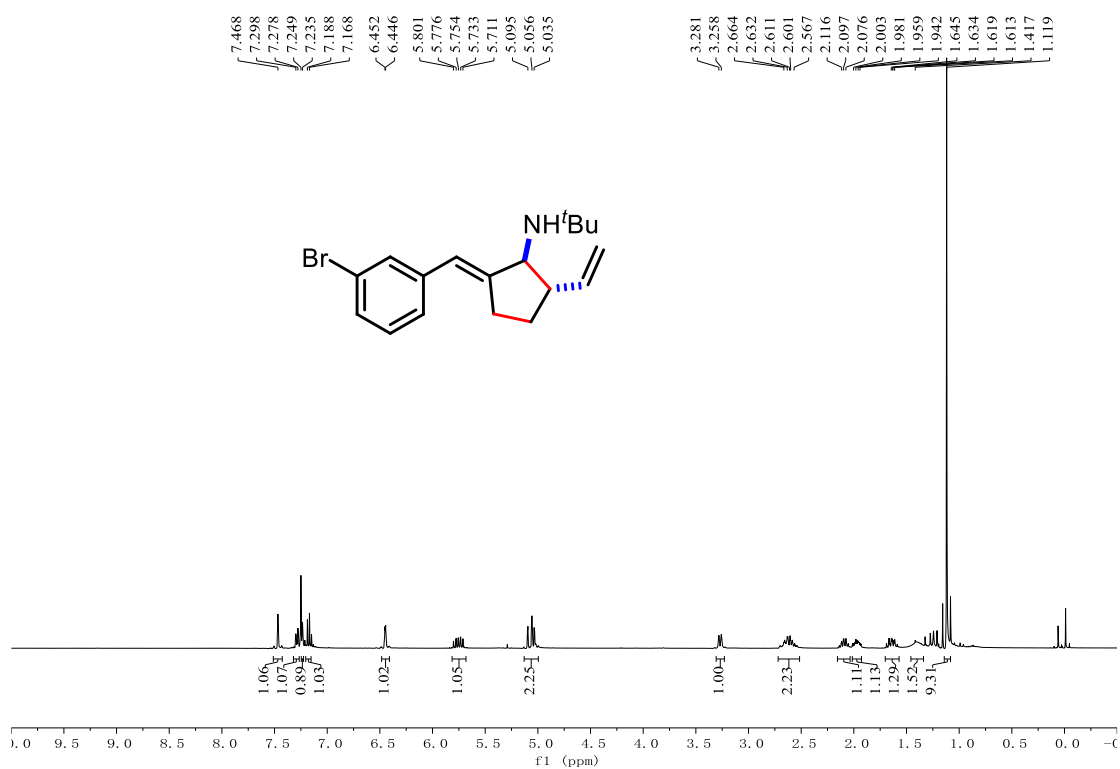

**$^{13}\text{C}$  NMR spectrum of *trans*-3oac (101 MHz,  $\text{CDCl}_3$ )**

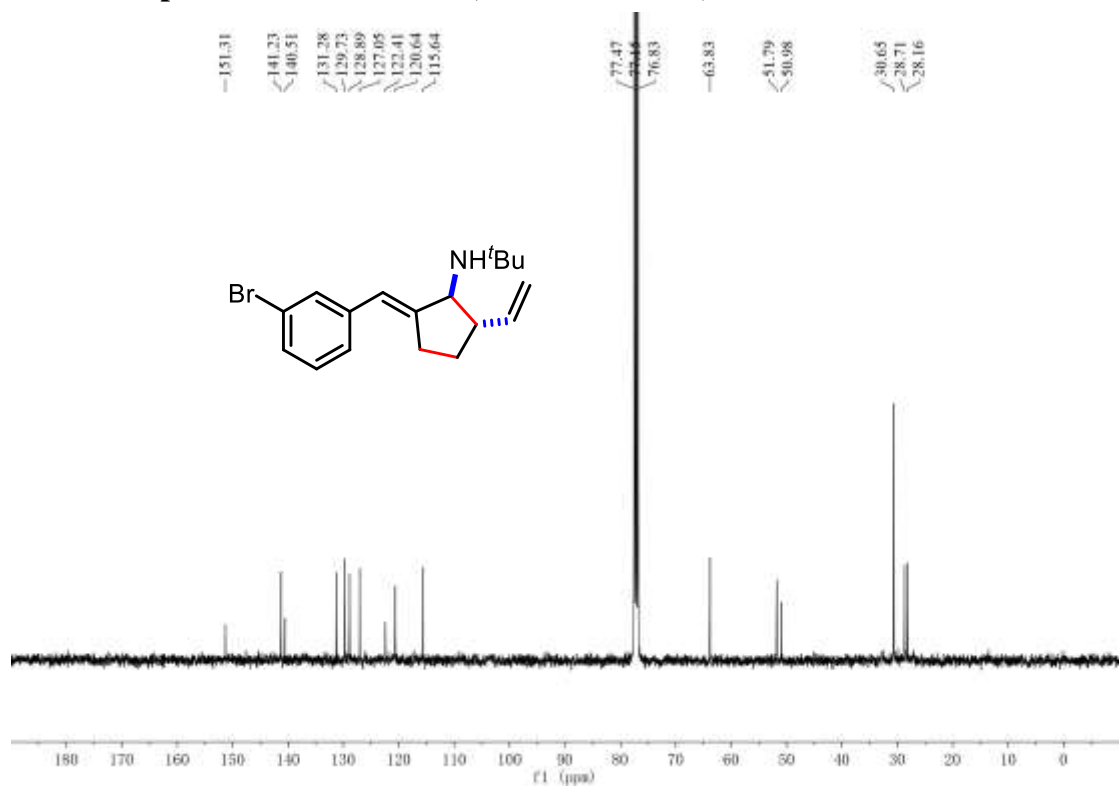

**<sup>1</sup>H NMR spectrum of *cis*-3rac (400 MHz, CDCl<sub>3</sub>)**

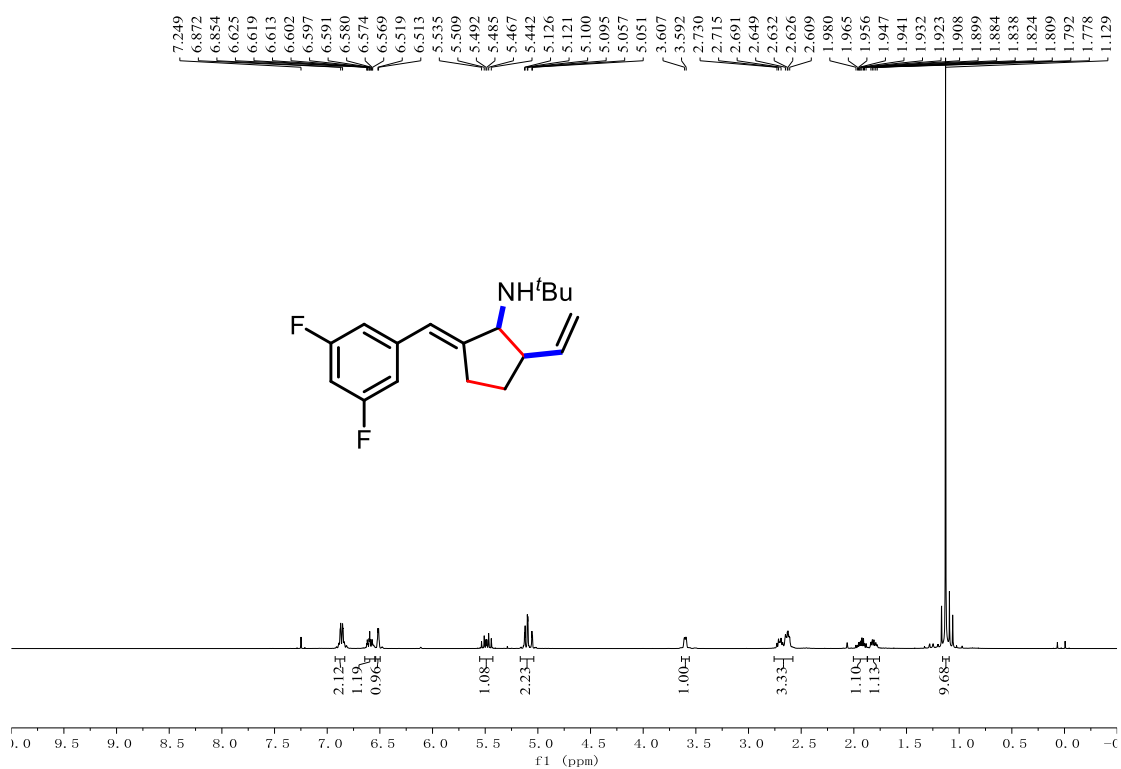

**<sup>13</sup>C NMR spectrum of *cis*-3rac (101 MHz, CDCl<sub>3</sub>)**

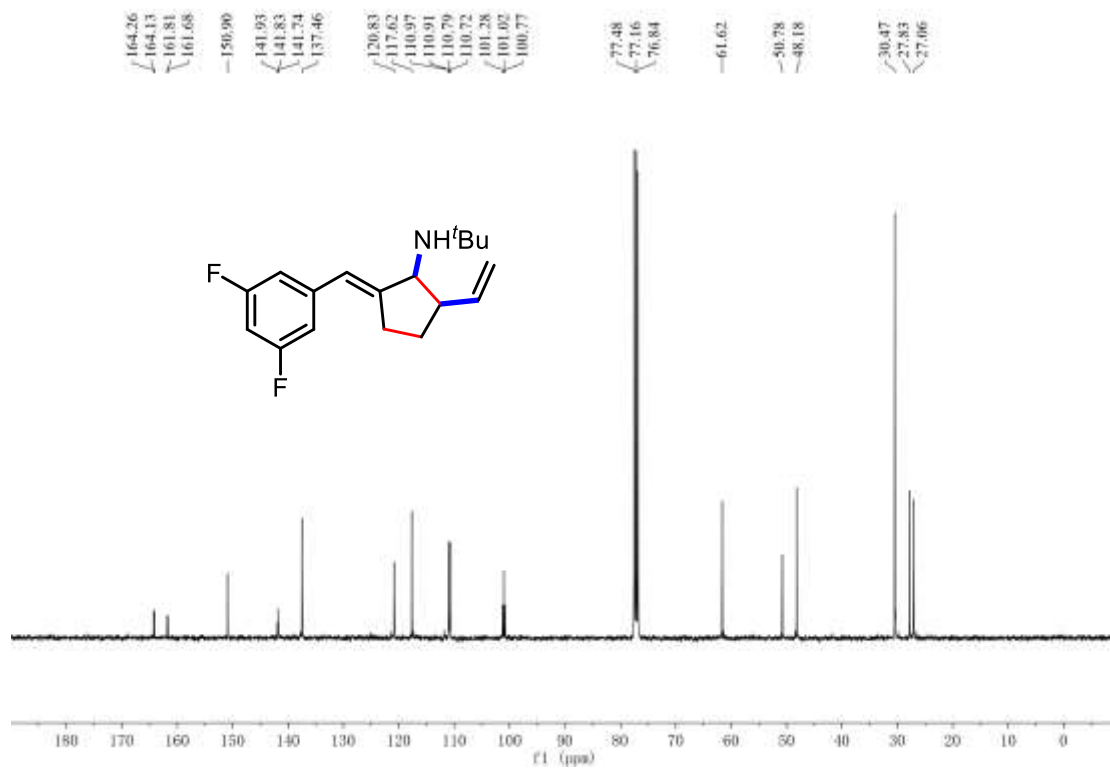

**<sup>1</sup>H NMR spectrum of *cis*-5ba (400 MHz, CDCl<sub>3</sub>)**

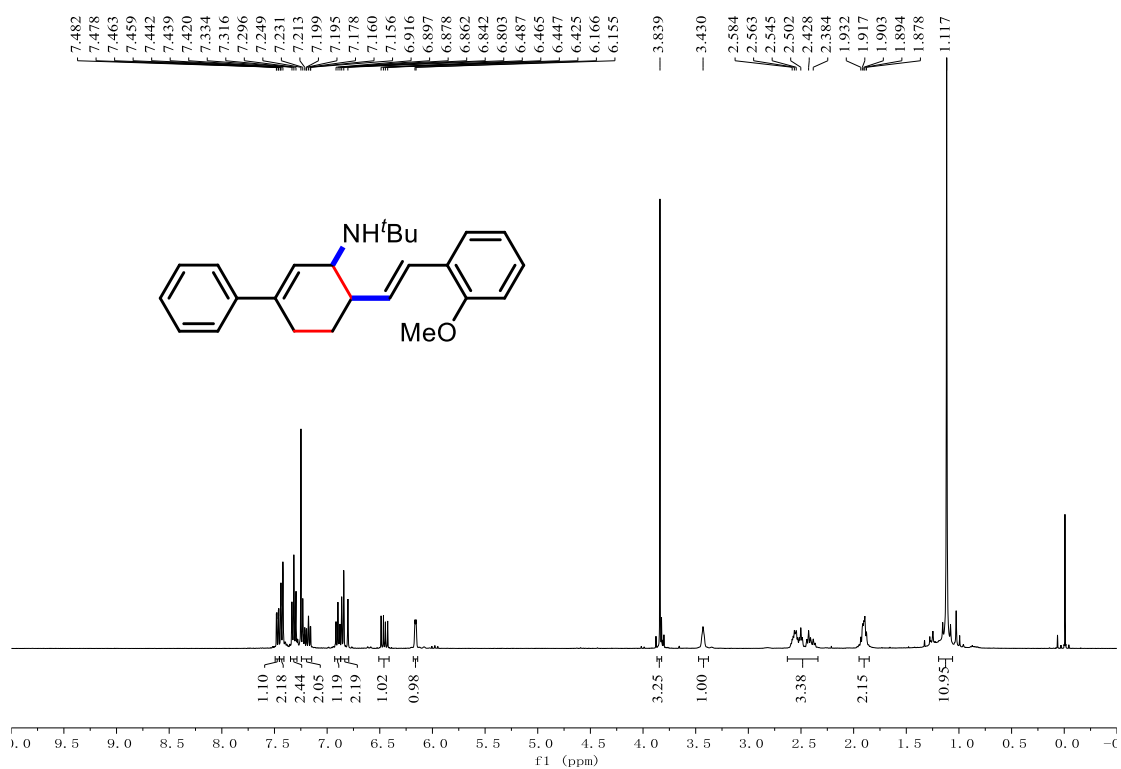

**<sup>13</sup>C NMR spectrum of *cis*-5ba (101 MHz, CDCl<sub>3</sub>)**

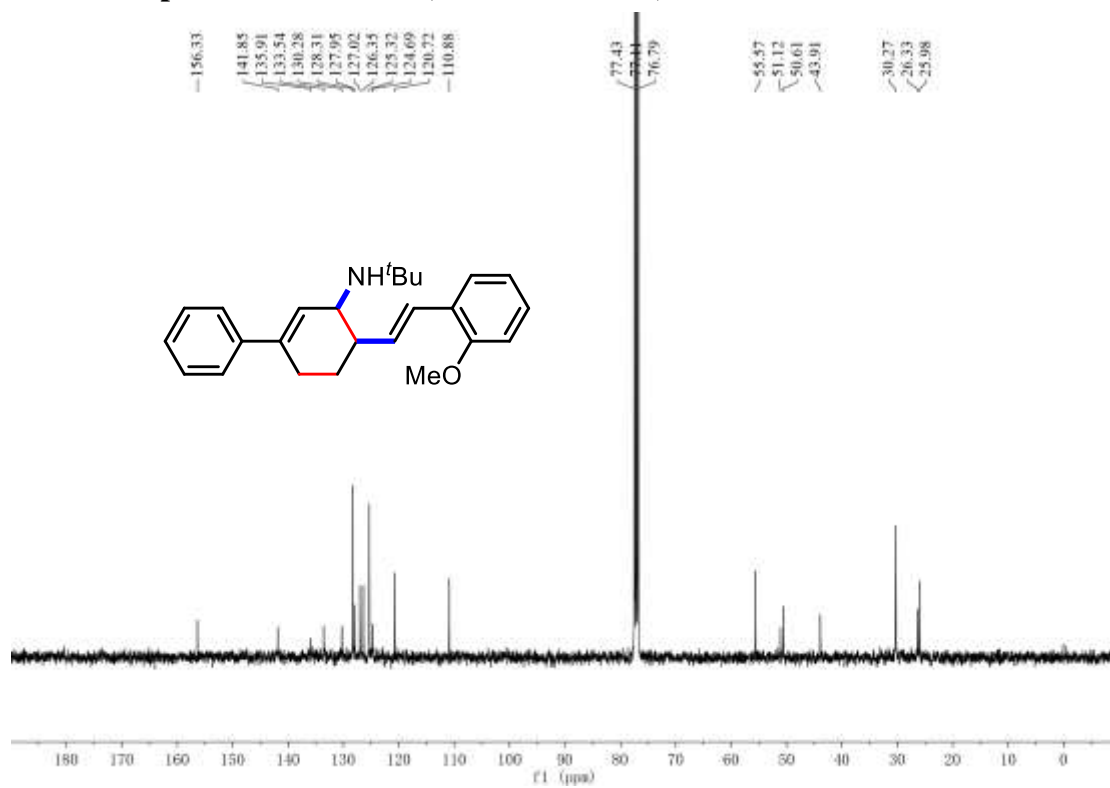

### <sup>1</sup>H NMR spectrum of *cis*-5ea (400 MHz, CDCl<sub>3</sub>)

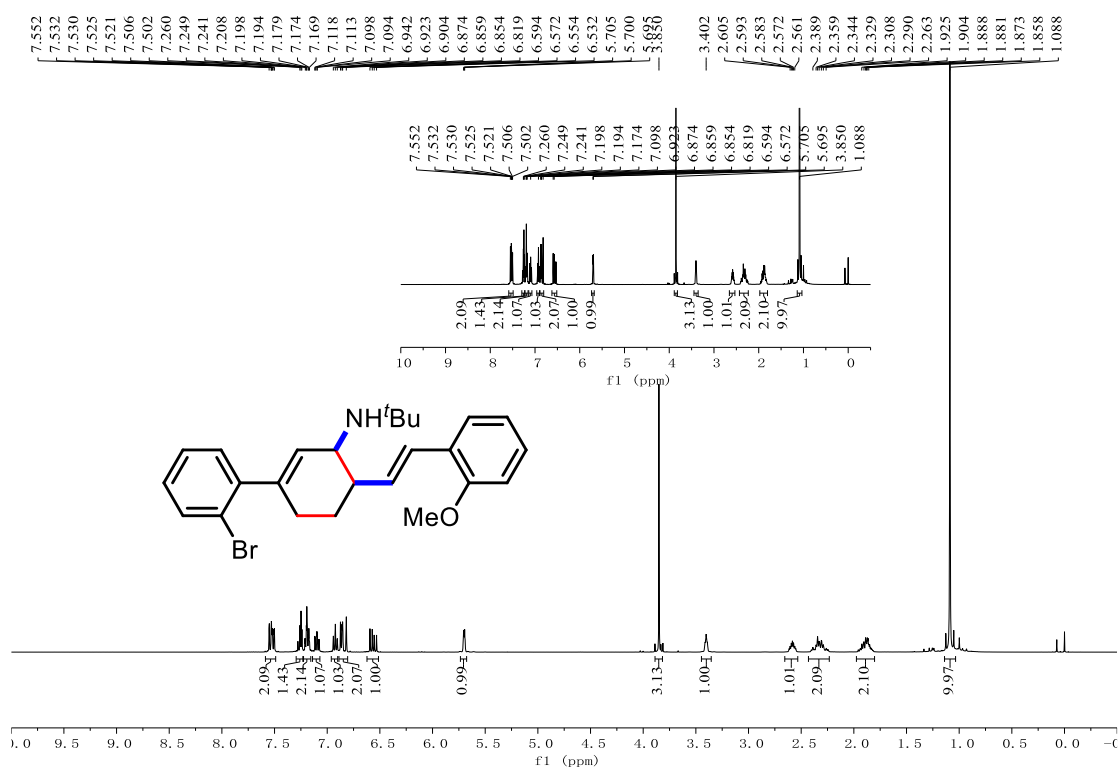

### <sup>13</sup>C NMR spectrum of *cis*-5ea (101 MHz, CDCl<sub>3</sub>)

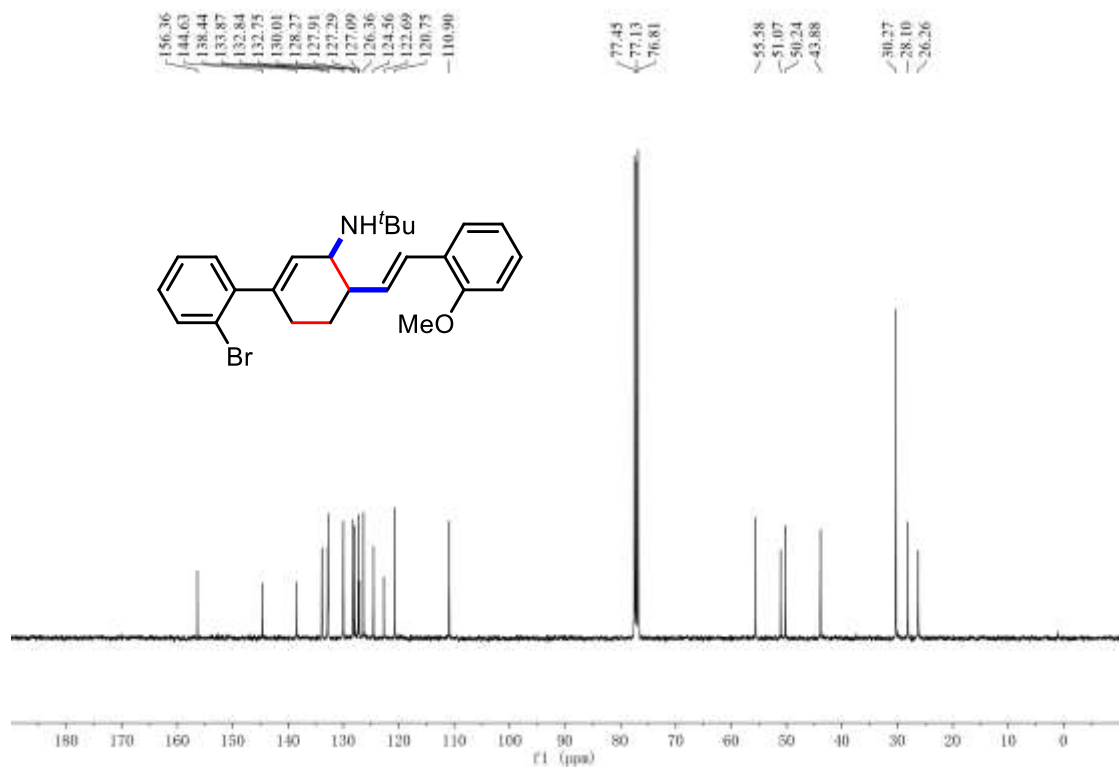

**<sup>1</sup>H NMR spectrum of *cis*-5fa (400 MHz, CDCl<sub>3</sub>)**

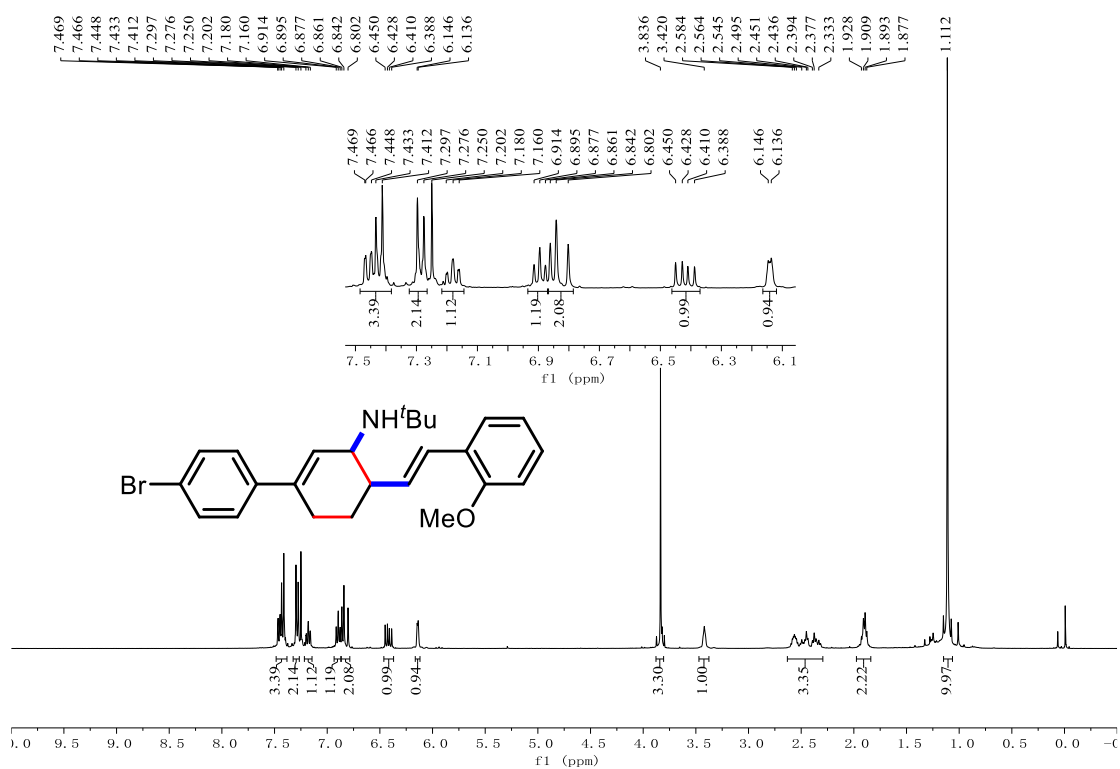

**<sup>13</sup>C NMR spectrum of *cis*-5fa (101 MHz, CDCl<sub>3</sub>)**

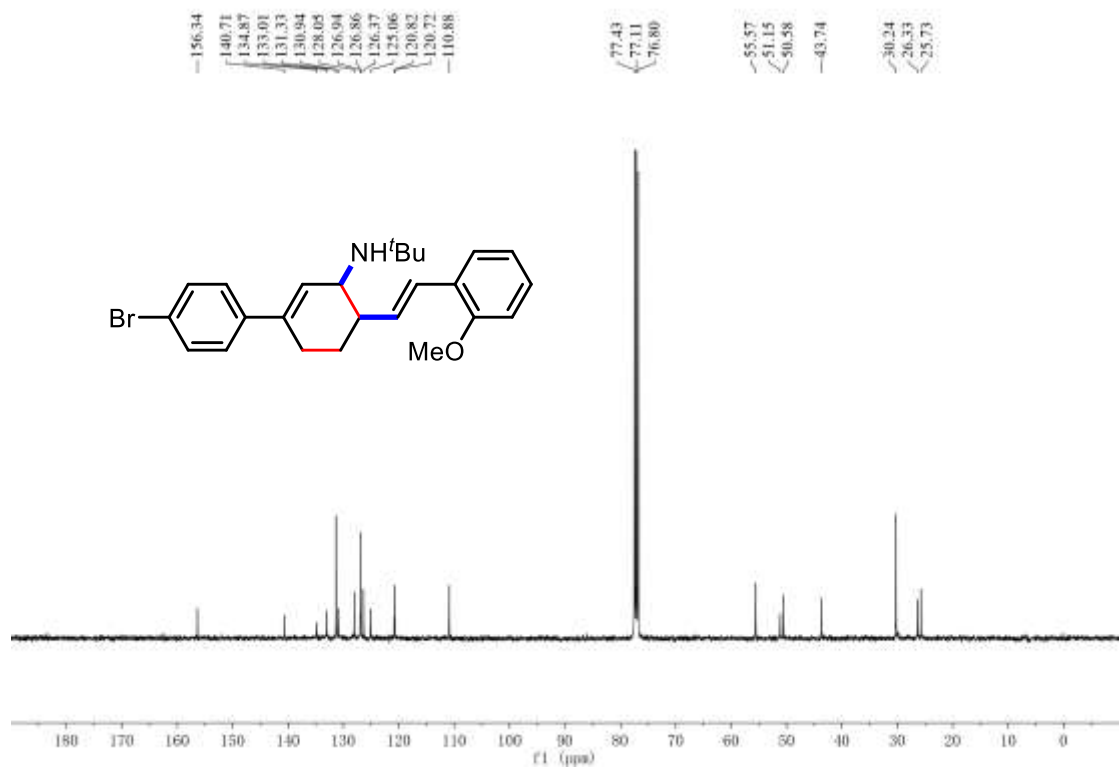

### $^1\text{H}$ NMR spectrum of *cis*-5ga (400 MHz, $\text{CDCl}_3$ )

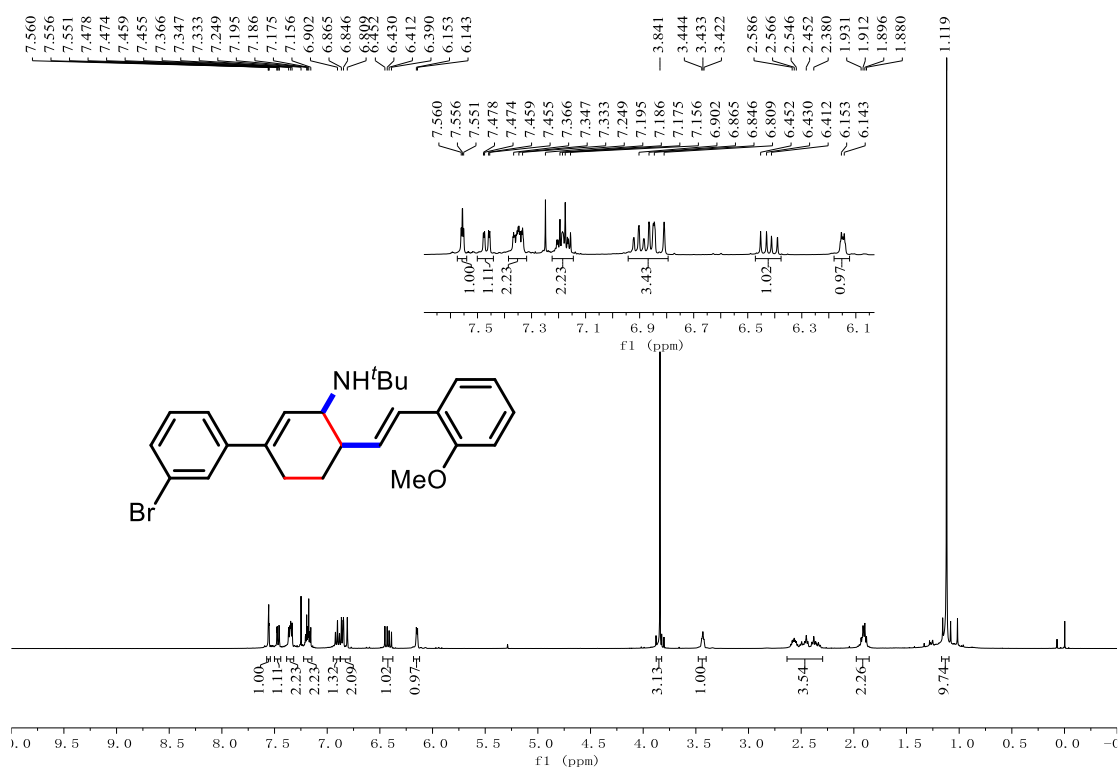

### $^{13}\text{C}$ NMR spectrum of *cis*-5ga (101 MHz, $\text{CDCl}_3$ )

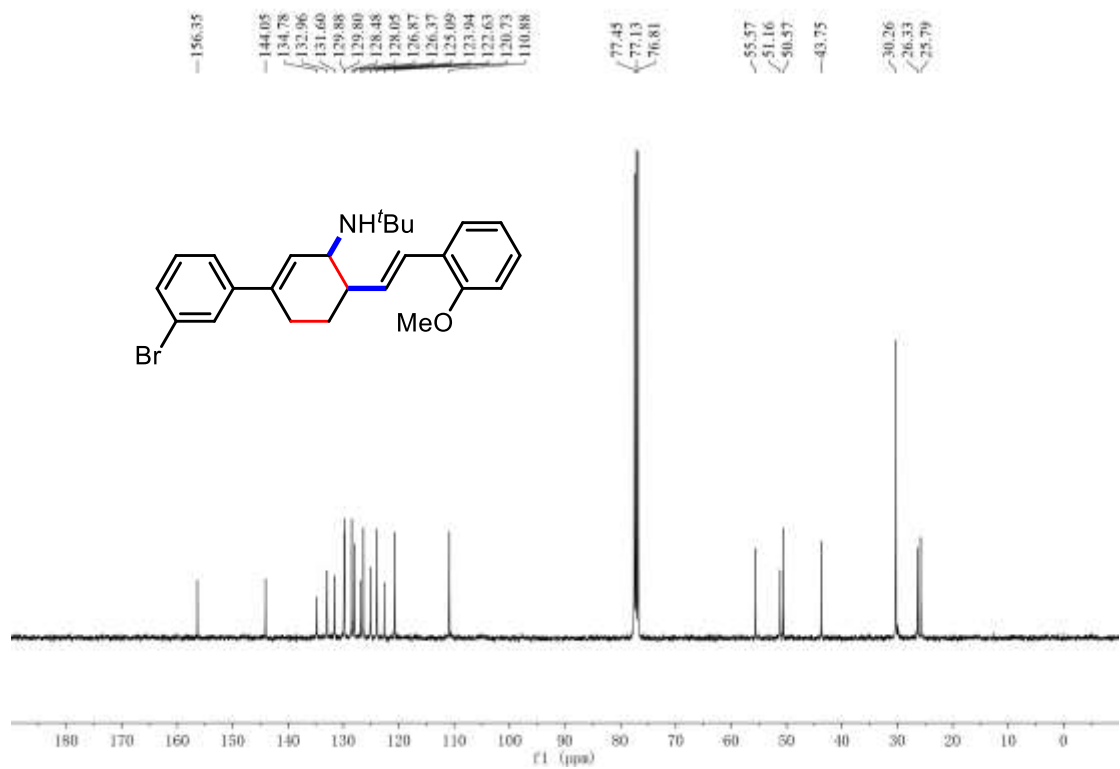

**<sup>1</sup>H NMR spectrum of *cis*-5ha (400 MHz, CDCl<sub>3</sub>)**

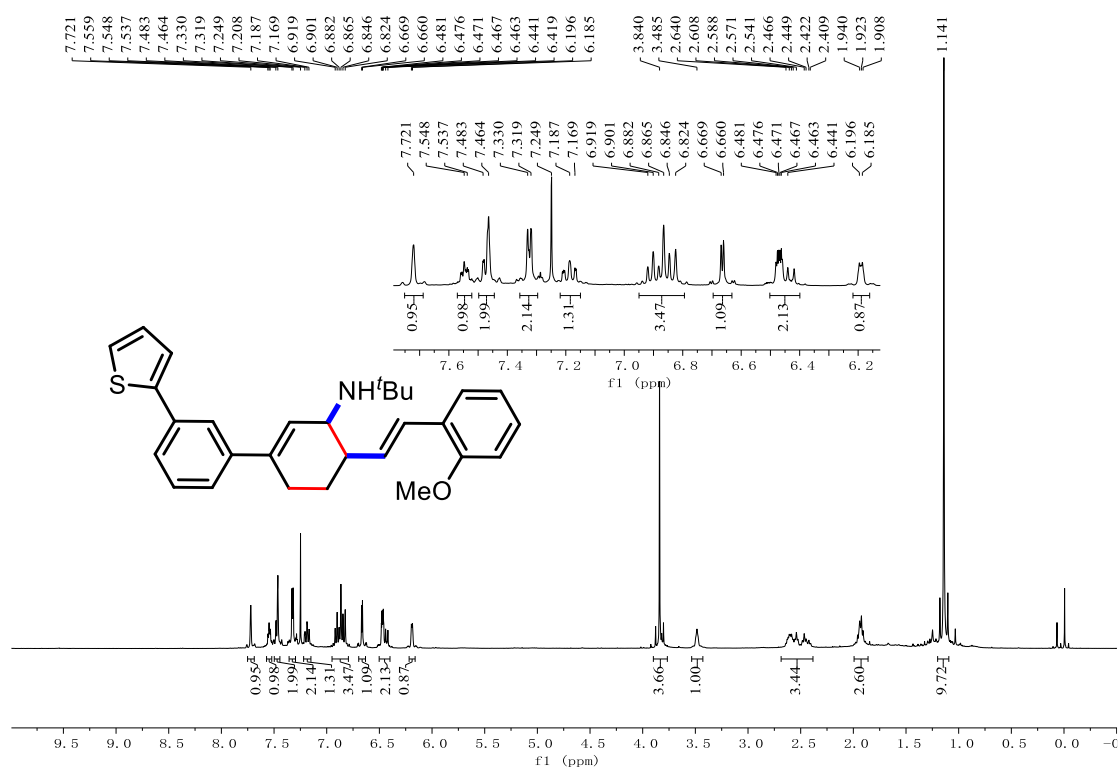

**<sup>13</sup>C NMR spectrum of *cis*-5ha (101 MHz, CDCl<sub>3</sub>)**

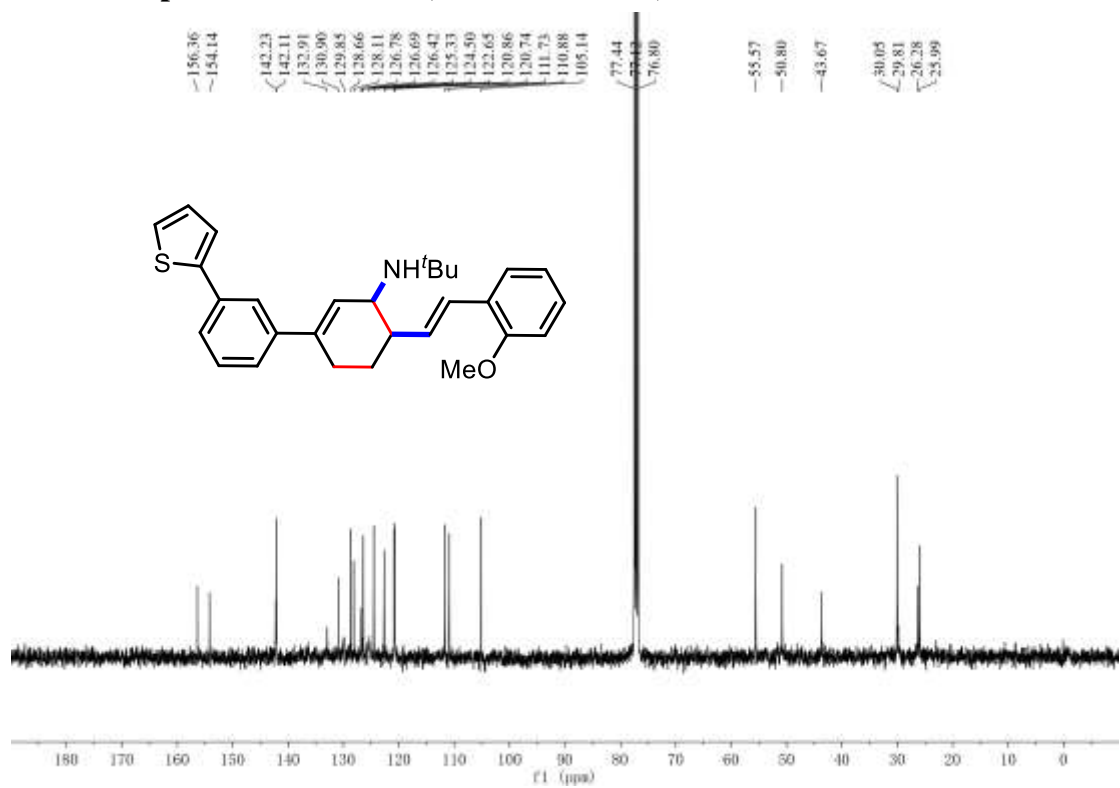

**<sup>1</sup>H NMR spectrum of *cis*-5ia (400 MHz, CDCl<sub>3</sub>)**

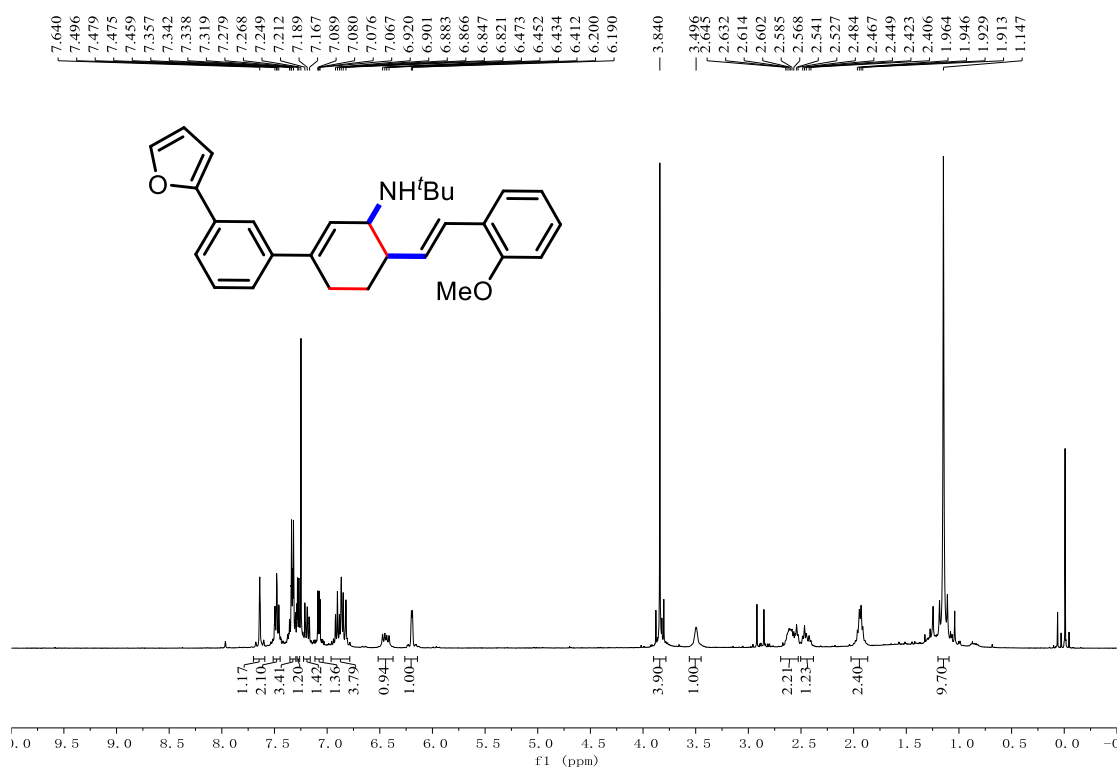

**<sup>13</sup>C NMR spectrum of *cis*-5ia (101 MHz, CDCl<sub>3</sub>)**

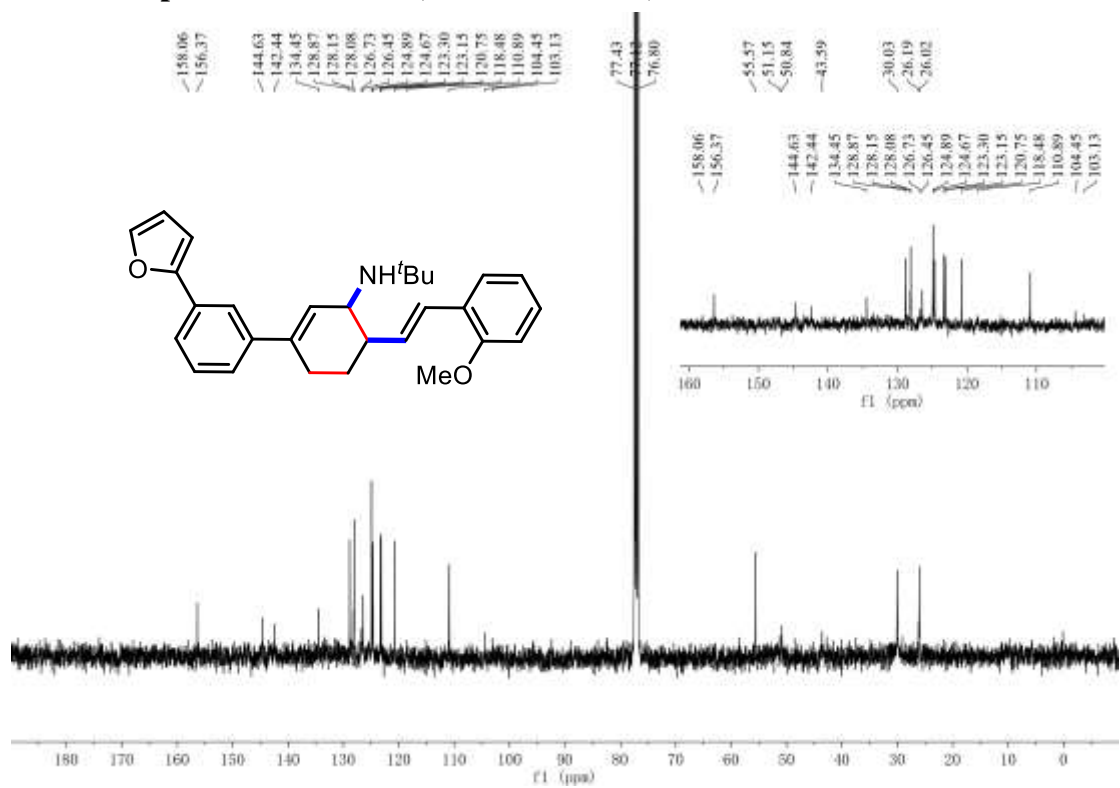

**<sup>1</sup>H NMR spectrum of *cis*-5ja (400 MHz, CDCl<sub>3</sub>)**

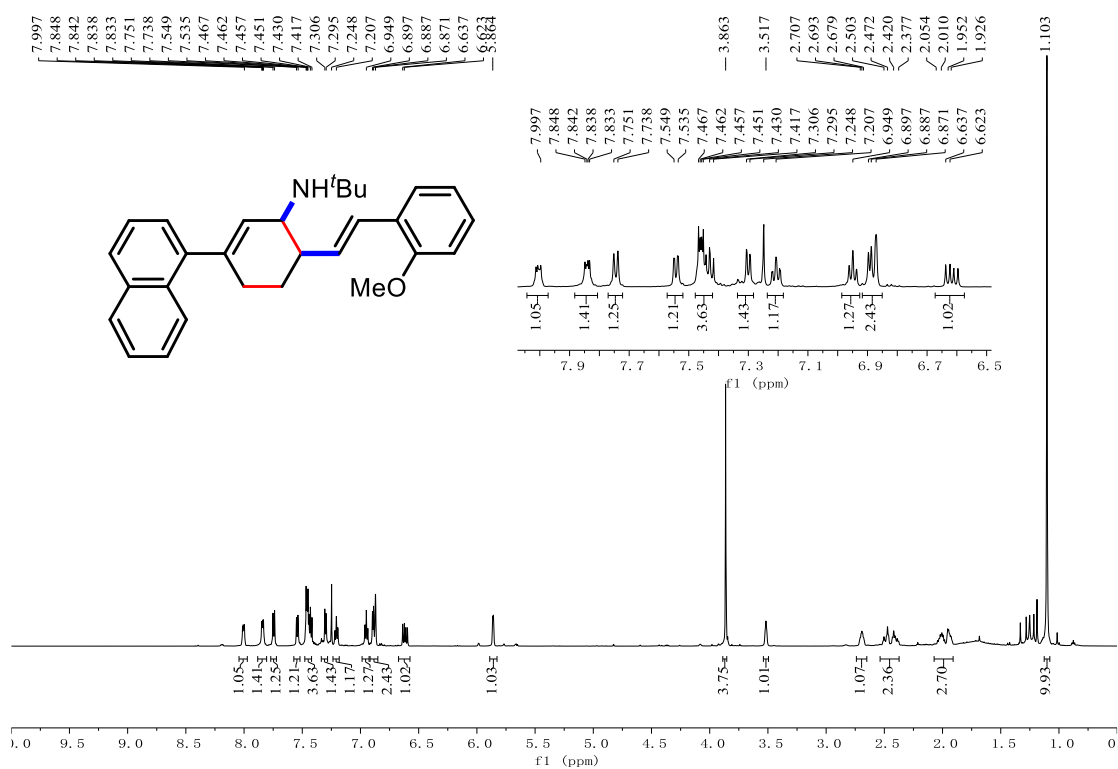

**<sup>13</sup>C NMR spectrum of *cis*-5ja (101 MHz, CDCl<sub>3</sub>)**

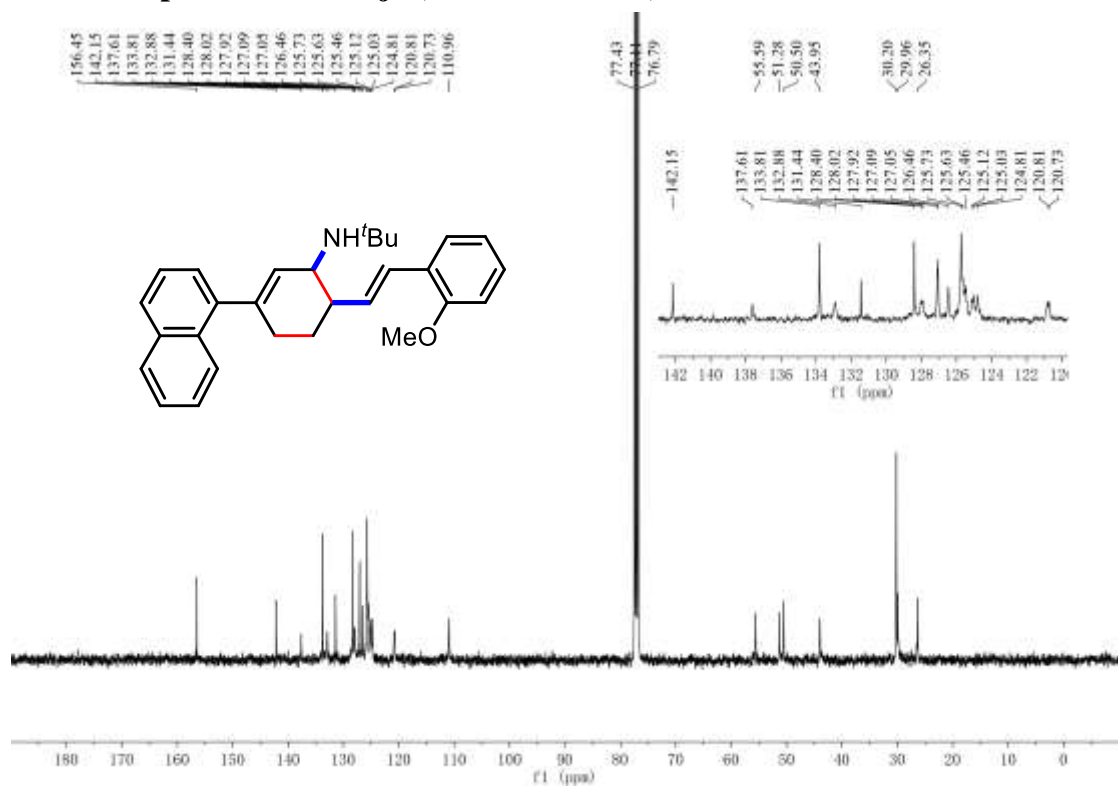

### <sup>1</sup>H NMR spectrum of *cis*-5ka (400 MHz, CDCl<sub>3</sub>)

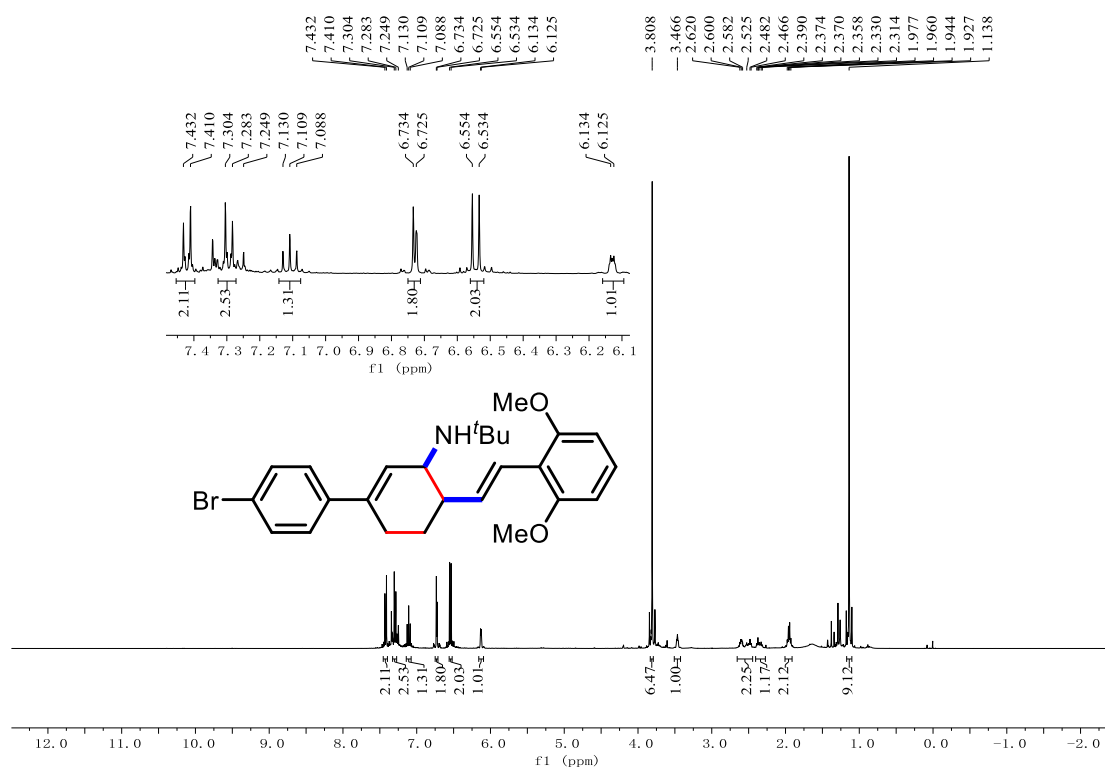

### <sup>13</sup>C NMR spectrum of *cis*-5ka (101 MHz, CDCl<sub>3</sub>)

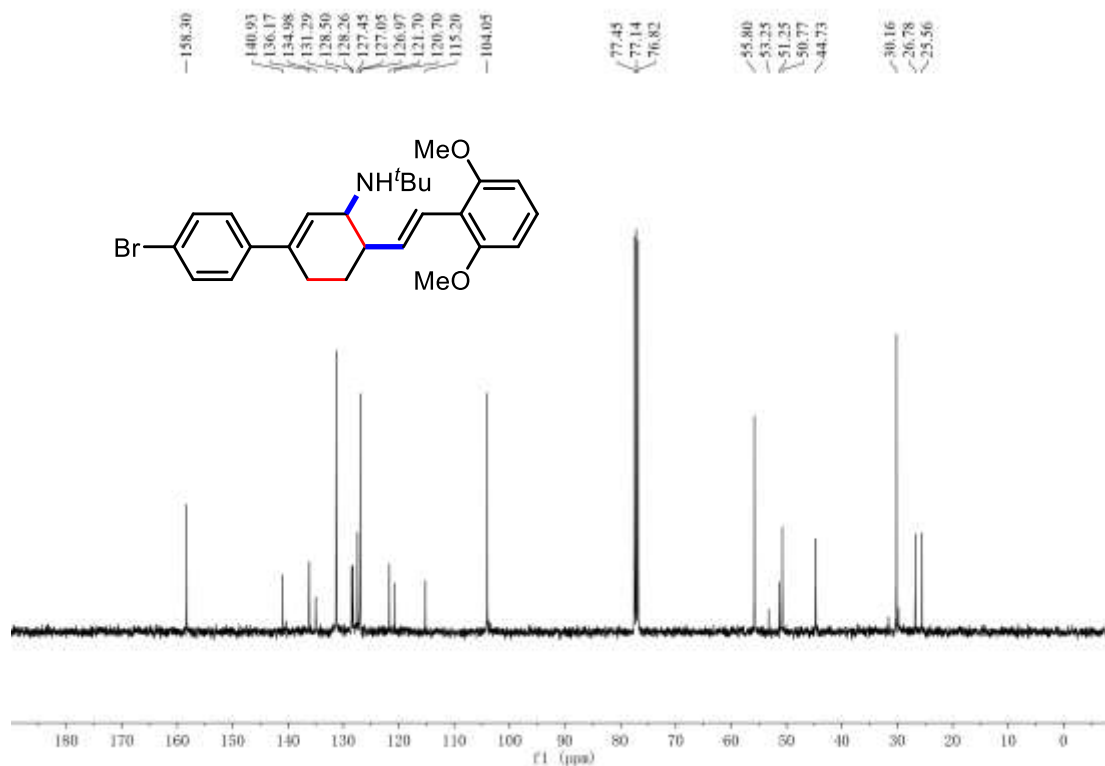

**<sup>1</sup>H NMR spectrum of *trans*-5ka (400 MHz, CDCl<sub>3</sub>)**

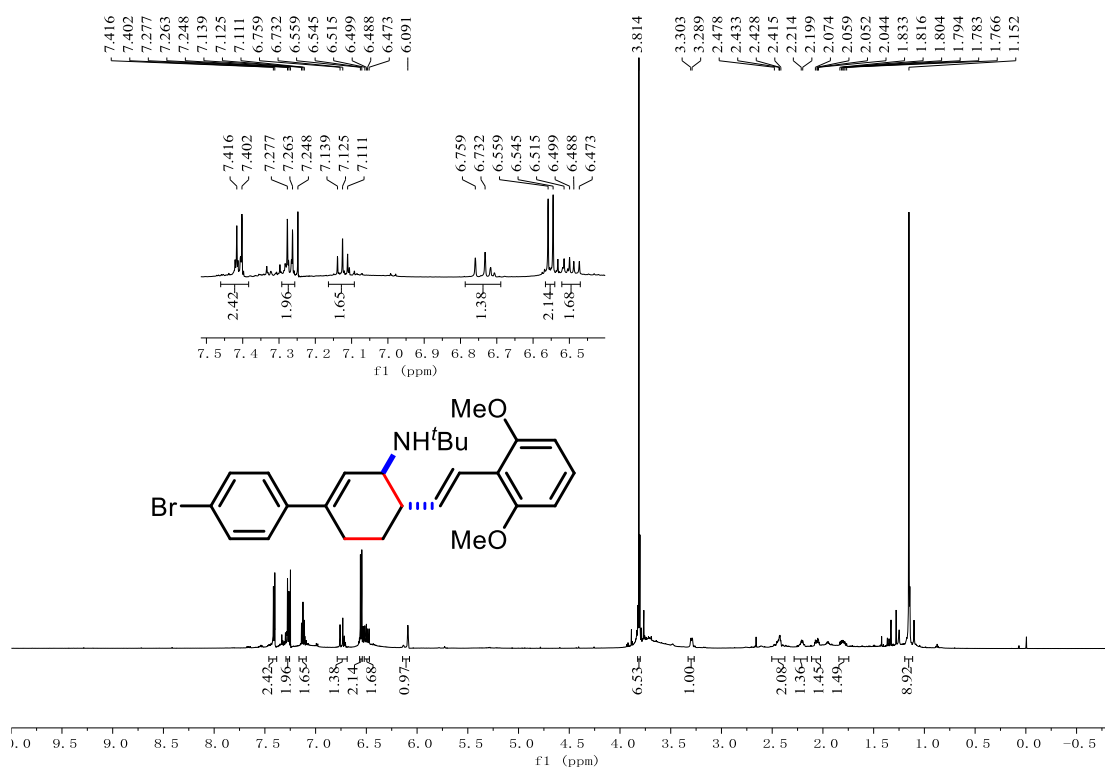

**<sup>13</sup>C NMR spectrum of *trans*-5ka (101 MHz, CDCl<sub>3</sub>)**

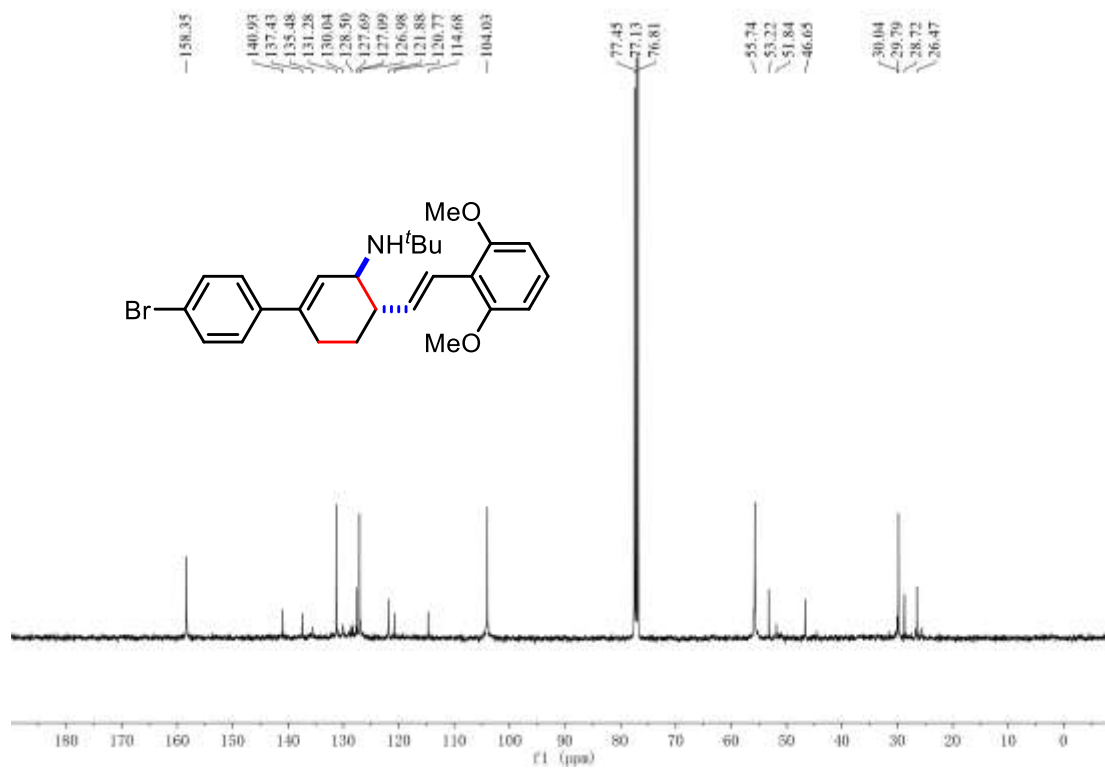

**<sup>1</sup>H NMR spectrum of *cis*-5la (400 MHz, CDCl<sub>3</sub>)**

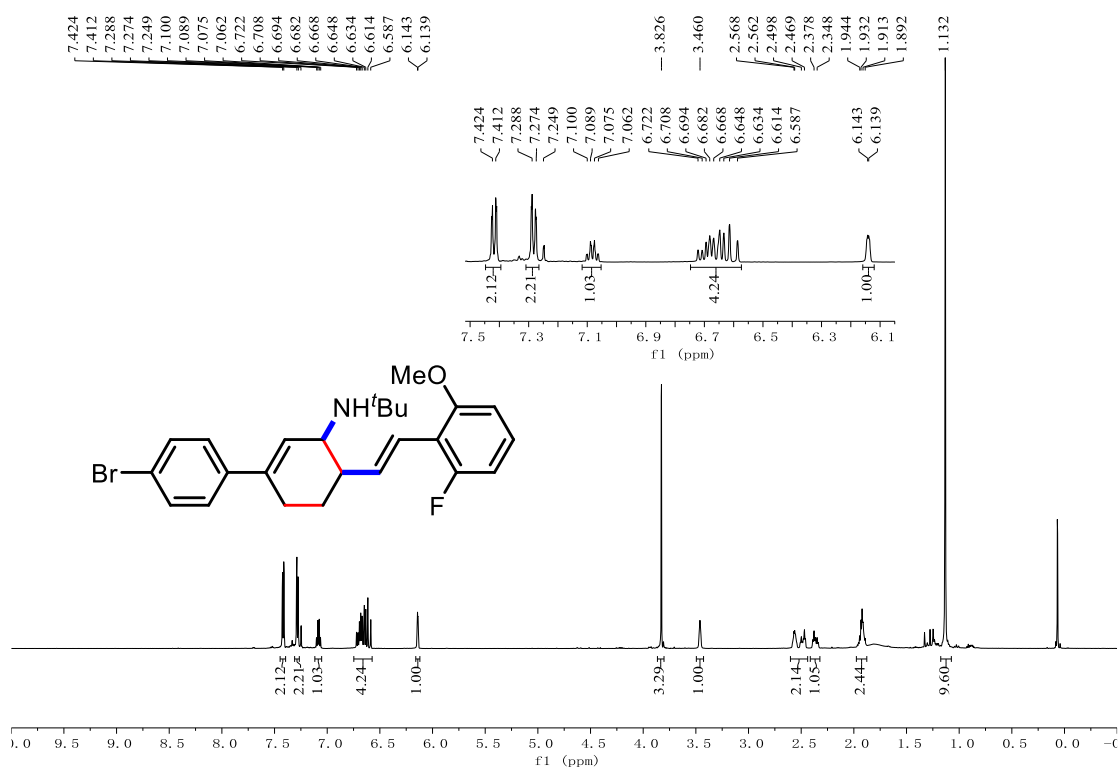

**<sup>13</sup>C NMR spectrum of *cis*-5la (101 MHz, CDCl<sub>3</sub>)**

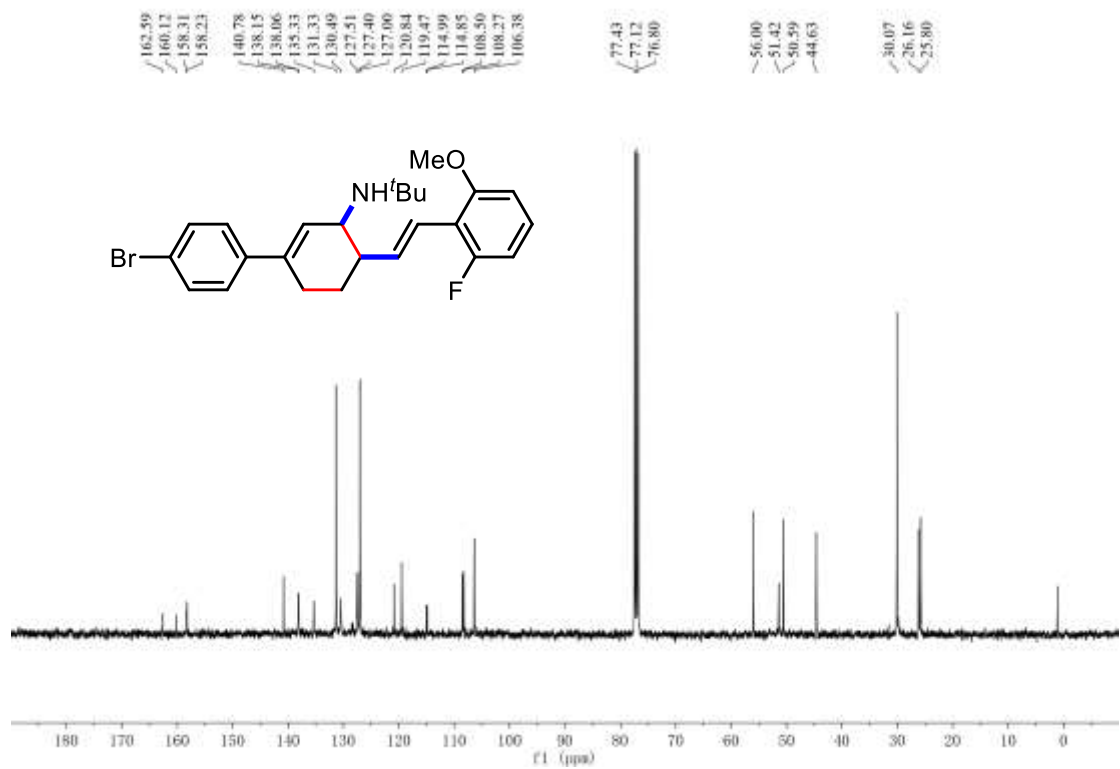

**<sup>1</sup>H NMR spectrum of *cis*-5ma (400 MHz, CDCl<sub>3</sub>)**

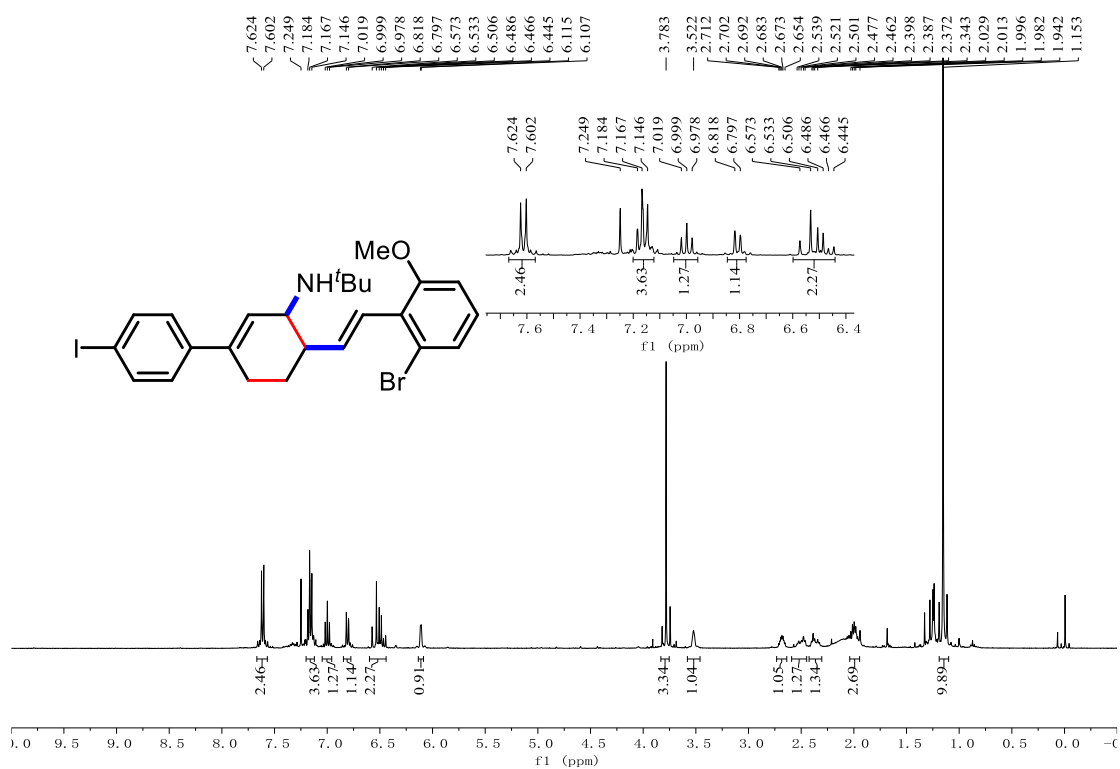

**<sup>13</sup>C NMR spectrum of *cis*-5ma (101 MHz, CDCl<sub>3</sub>)**

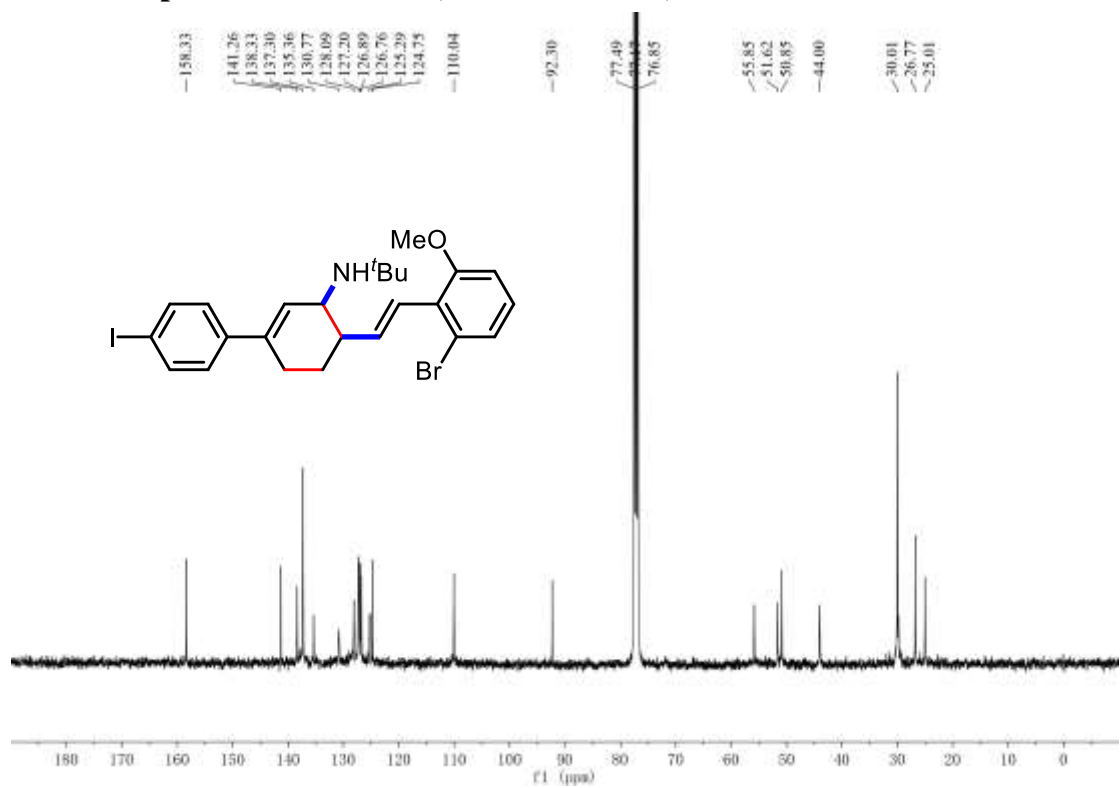

**<sup>1</sup>H NMR spectrum of *cis*-5na (600 MHz, CDCl<sub>3</sub>)**

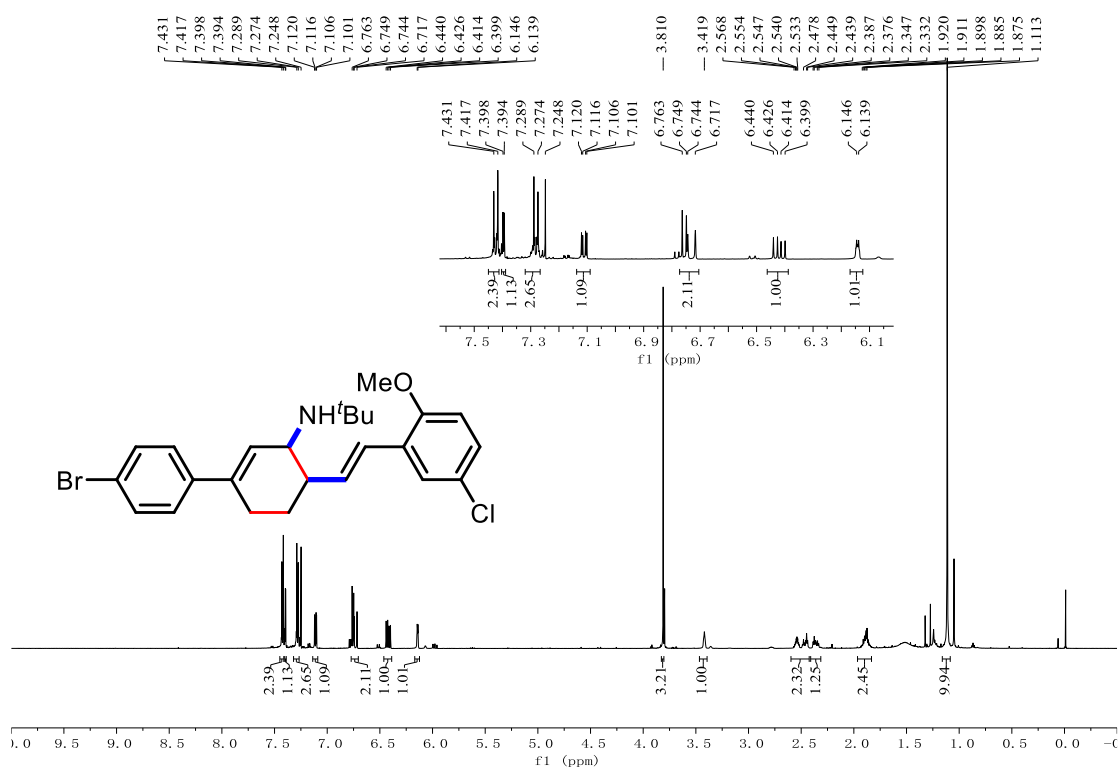

**<sup>13</sup>C NMR spectrum of *cis*-5na (101 MHz, CDCl<sub>3</sub>)**

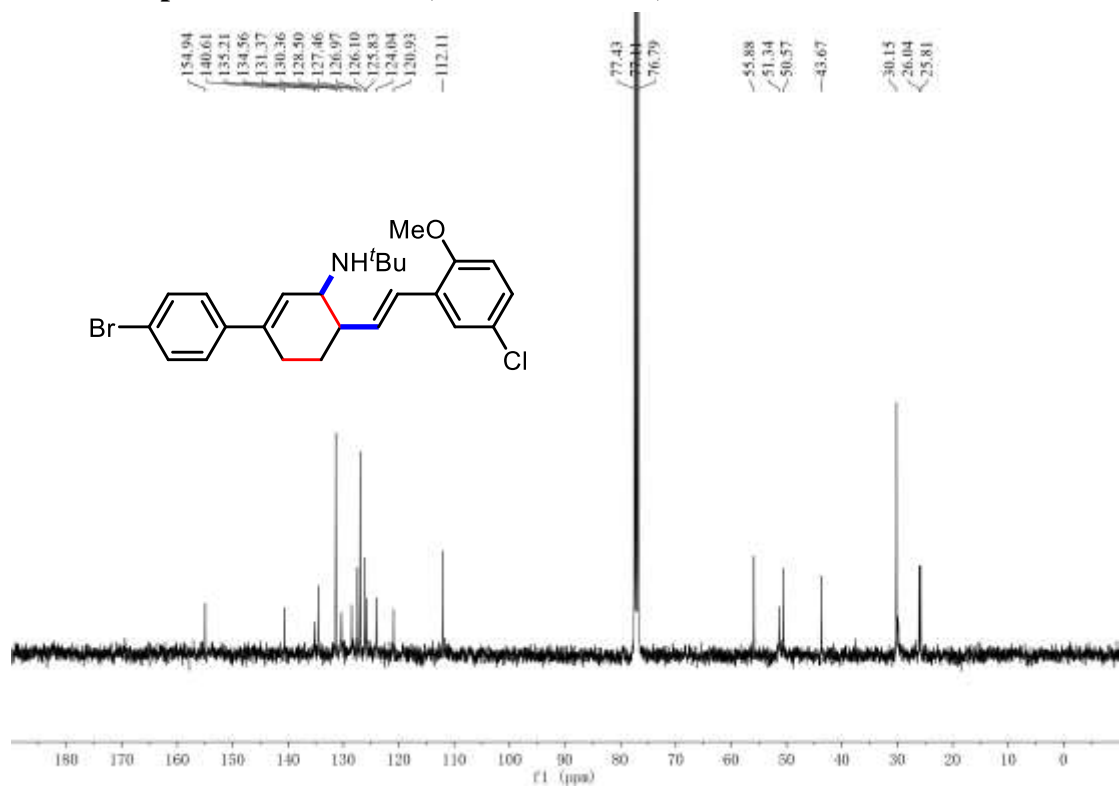

**<sup>1</sup>H NMR spectrum of *cis*-5oa (600 MHz, CDCl<sub>3</sub>)**

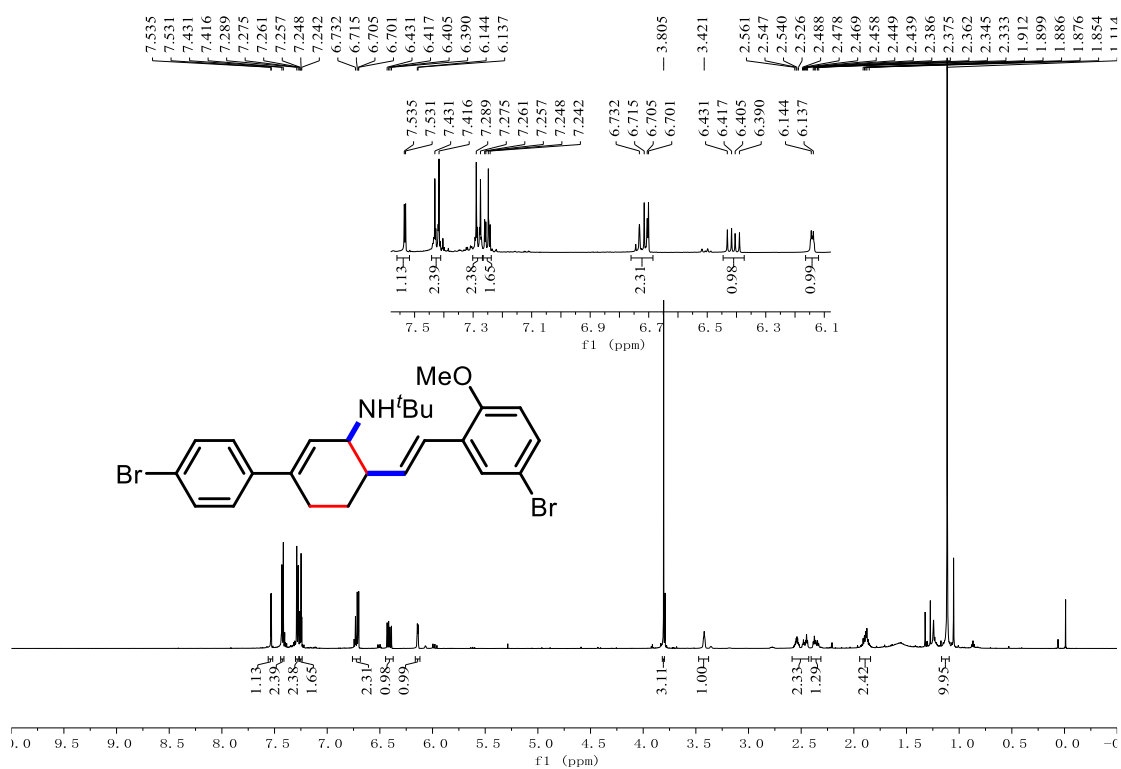

**<sup>13</sup>C NMR spectrum of *cis*-5oa (101 MHz, CDCl<sub>3</sub>)**

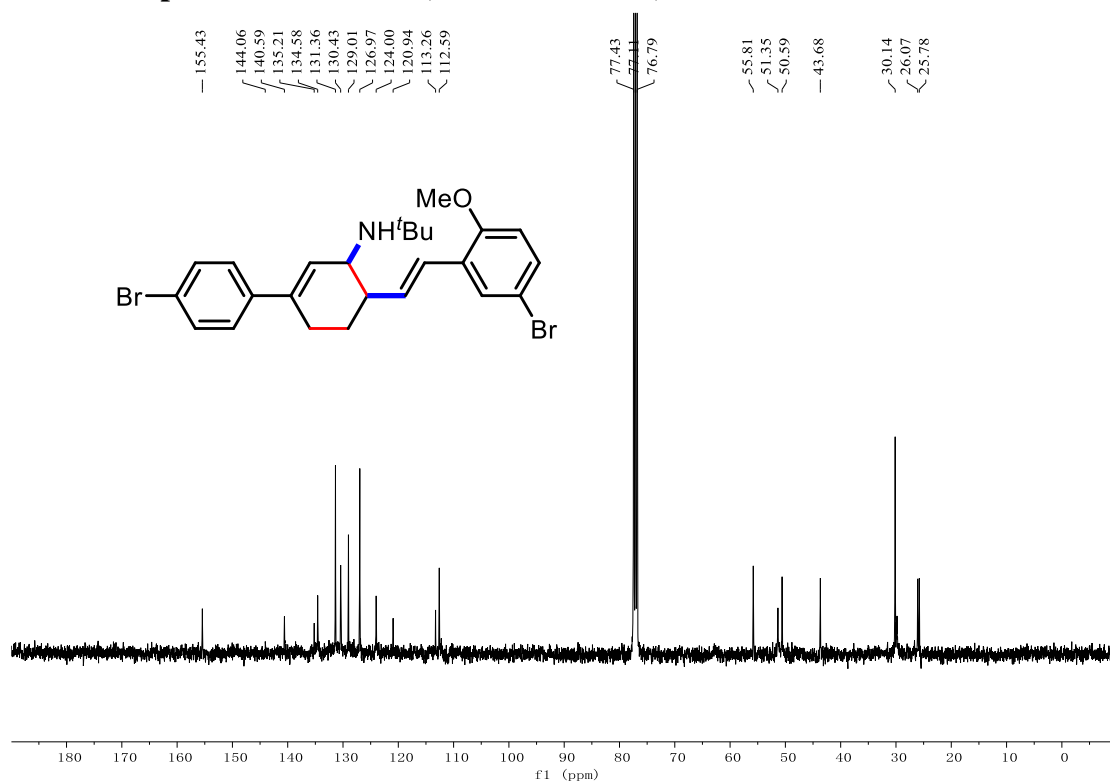

**<sup>1</sup>H NMR spectrum of *cis*-5pa (600 MHz, CDCl<sub>3</sub>)**

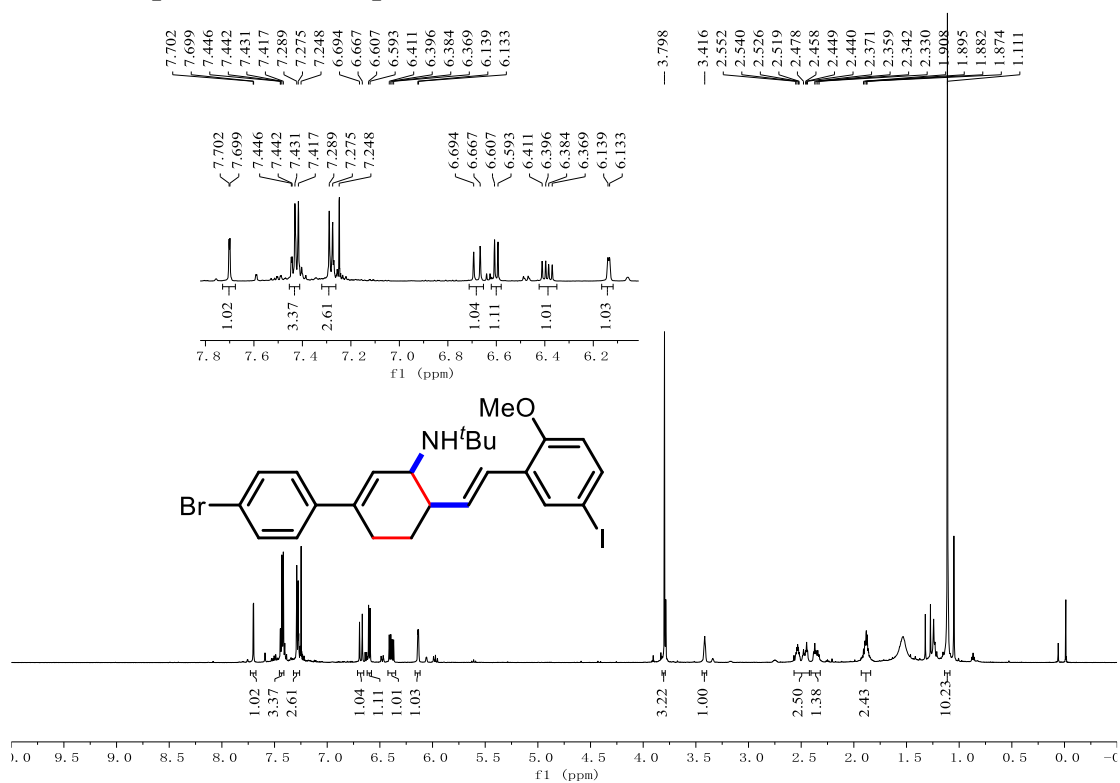

**<sup>13</sup>C NMR spectrum of *cis*-5pa (101 MHz, CDCl<sub>3</sub>)**

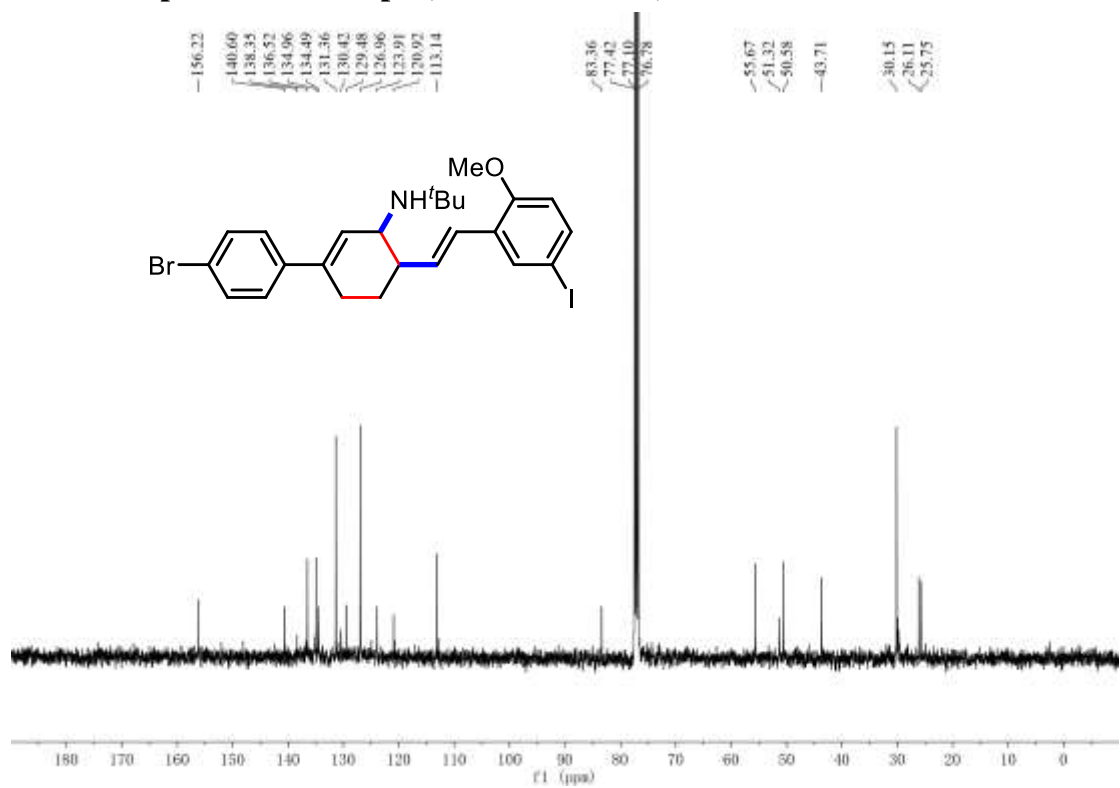

**<sup>1</sup>H NMR spectrum of *cis*-5qa (400 MHz, CDCl<sub>3</sub>)**

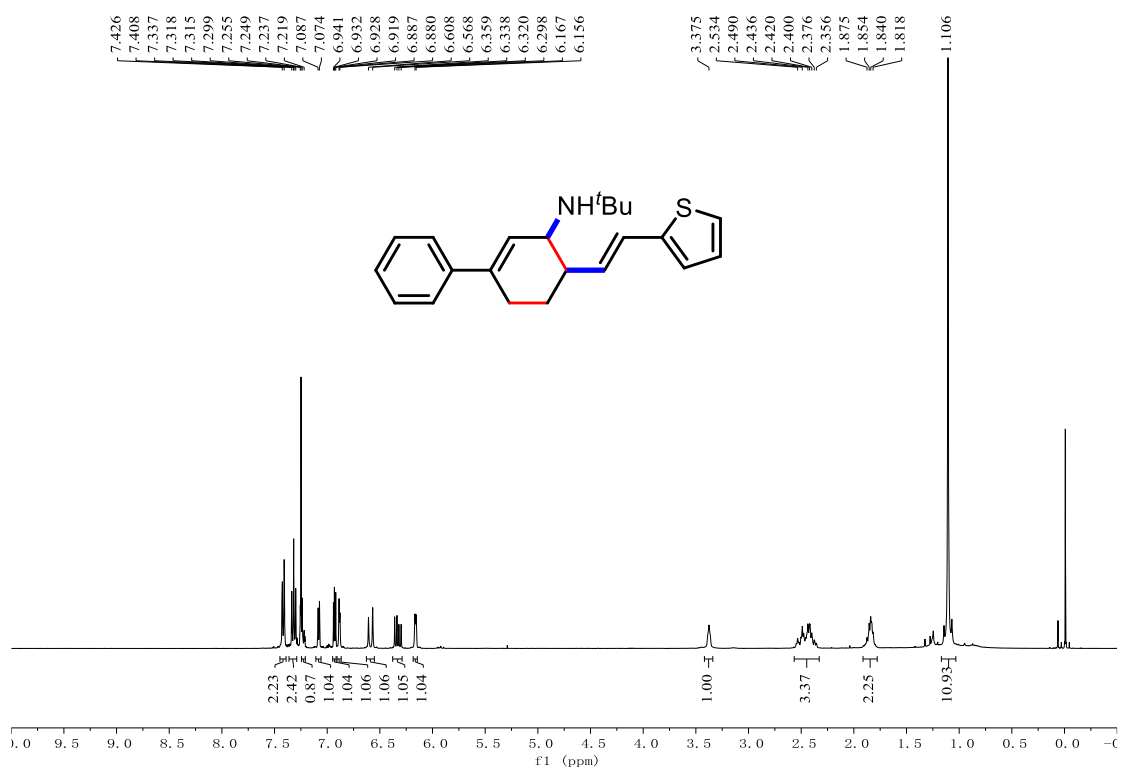

**<sup>13</sup>C NMR spectrum of *cis*-5qa (101 MHz, CDCl<sub>3</sub>)**

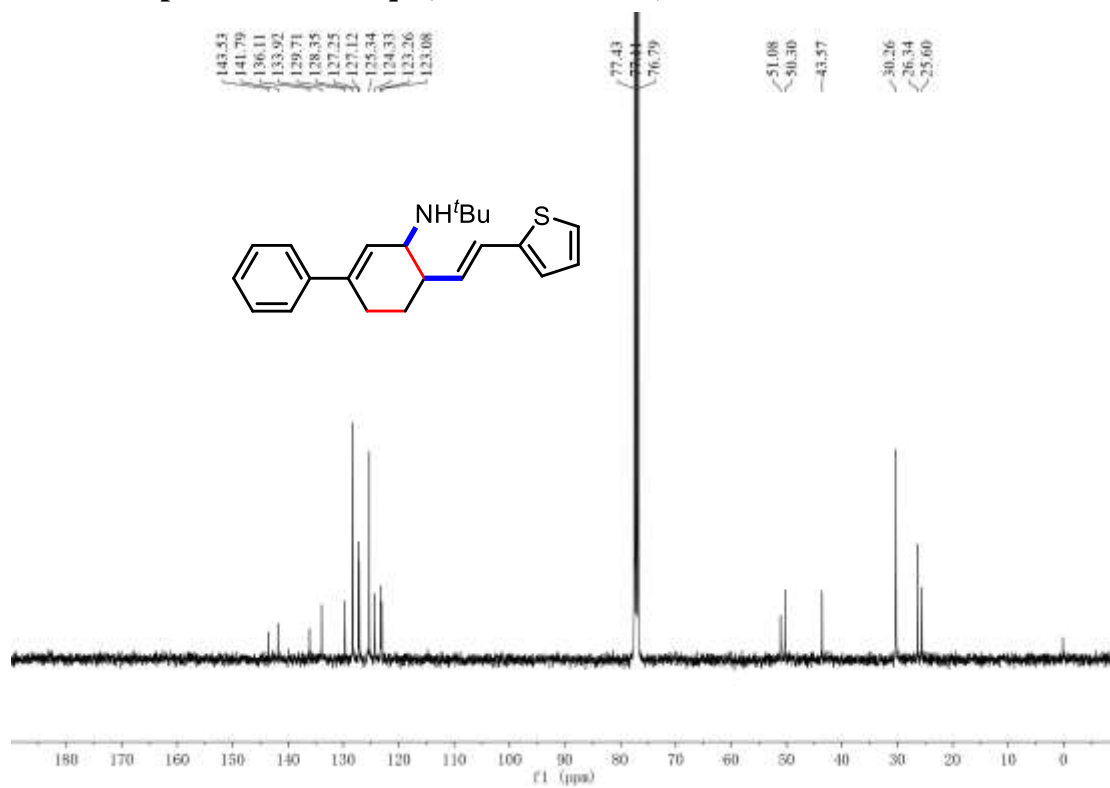

**<sup>1</sup>H NMR spectrum of *cis*-6aa (400 MHz, CDCl<sub>3</sub>)**

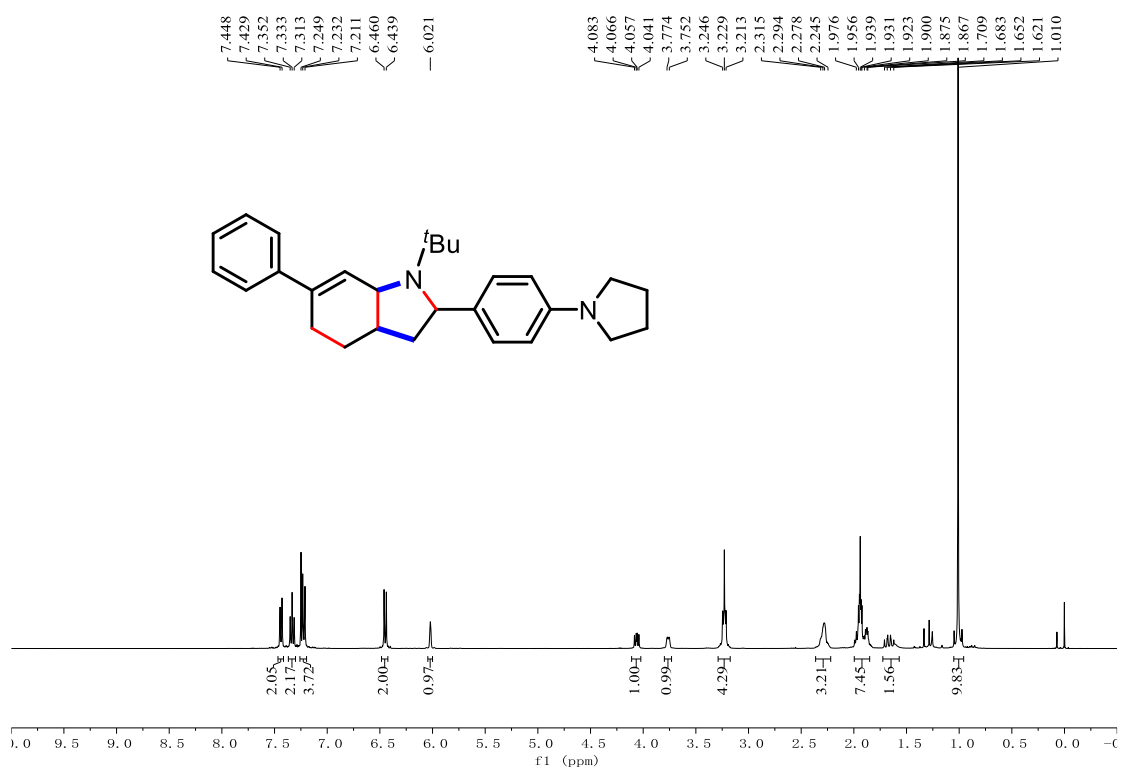

**<sup>13</sup>C NMR spectrum of *cis*-6aa (101 MHz, CDCl<sub>3</sub>)**

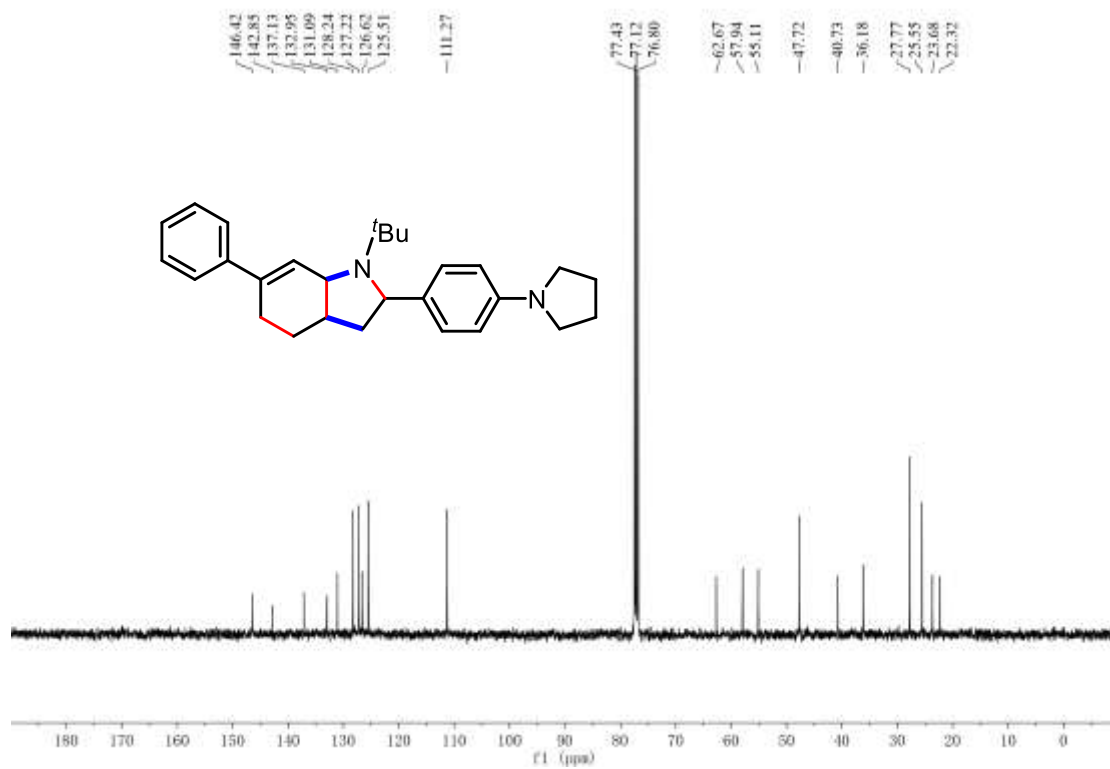

**<sup>1</sup>H NMR spectrum of *cis*-6ba (400 MHz, CDCl<sub>3</sub>)**

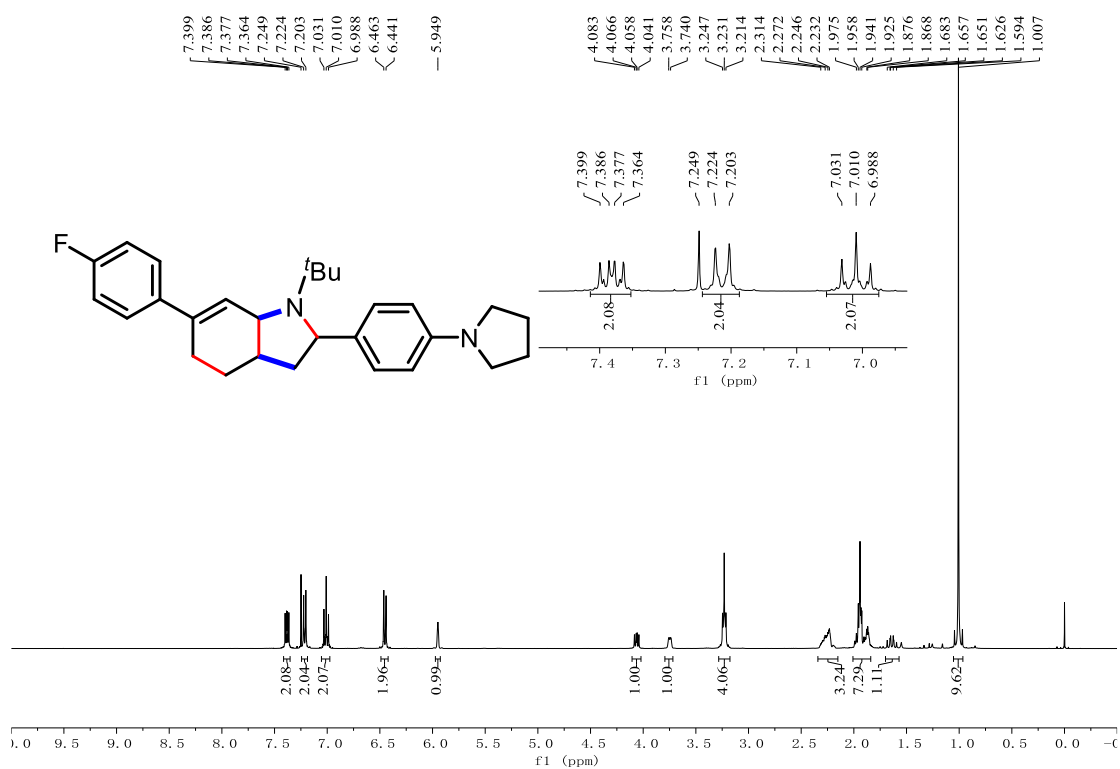

**<sup>13</sup>C NMR spectrum of *cis*-6ba (101 MHz, CDCl<sub>3</sub>)**

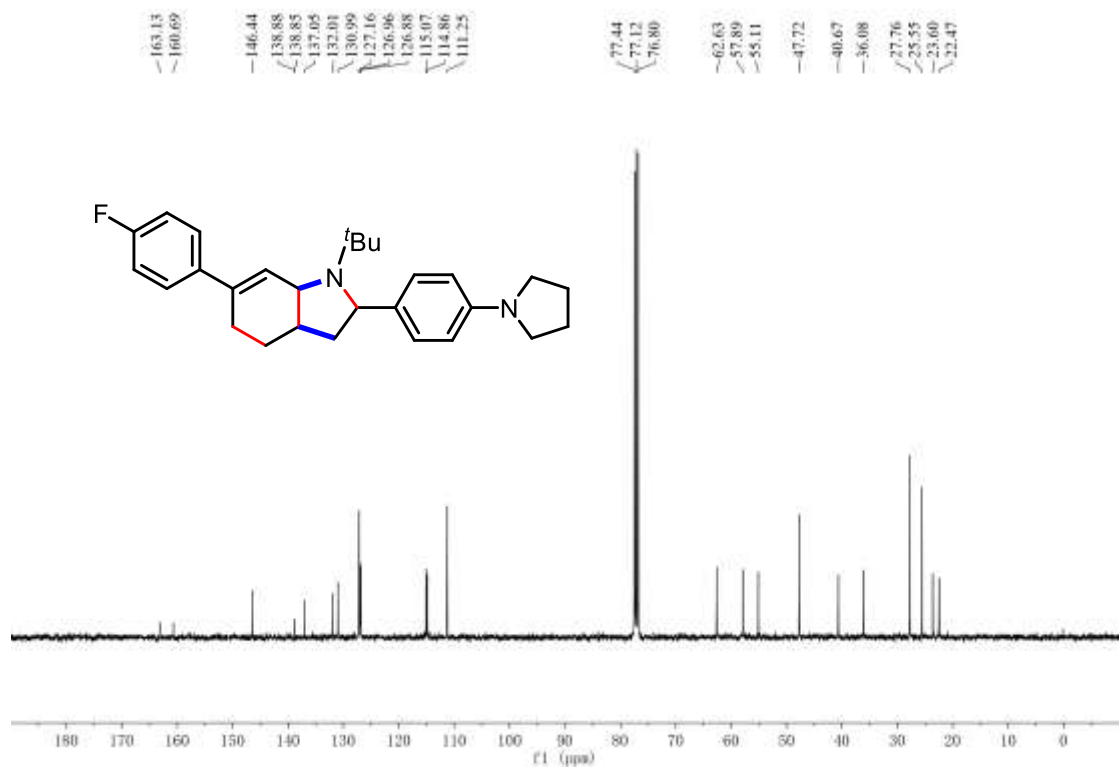

**<sup>1</sup>H NMR spectrum of *cis*-6ca (400 MHz, CDCl<sub>3</sub>)**

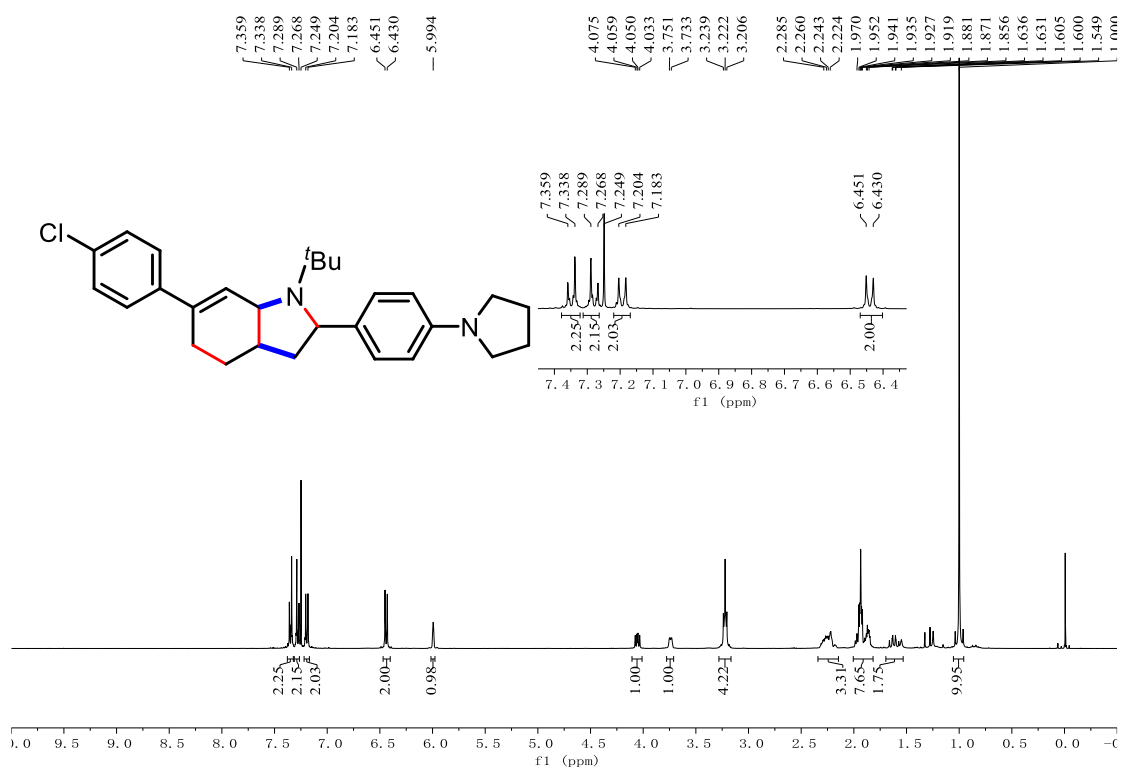

**<sup>13</sup>C NMR spectrum of *cis*-6ca (101 MHz, CDCl<sub>3</sub>)**

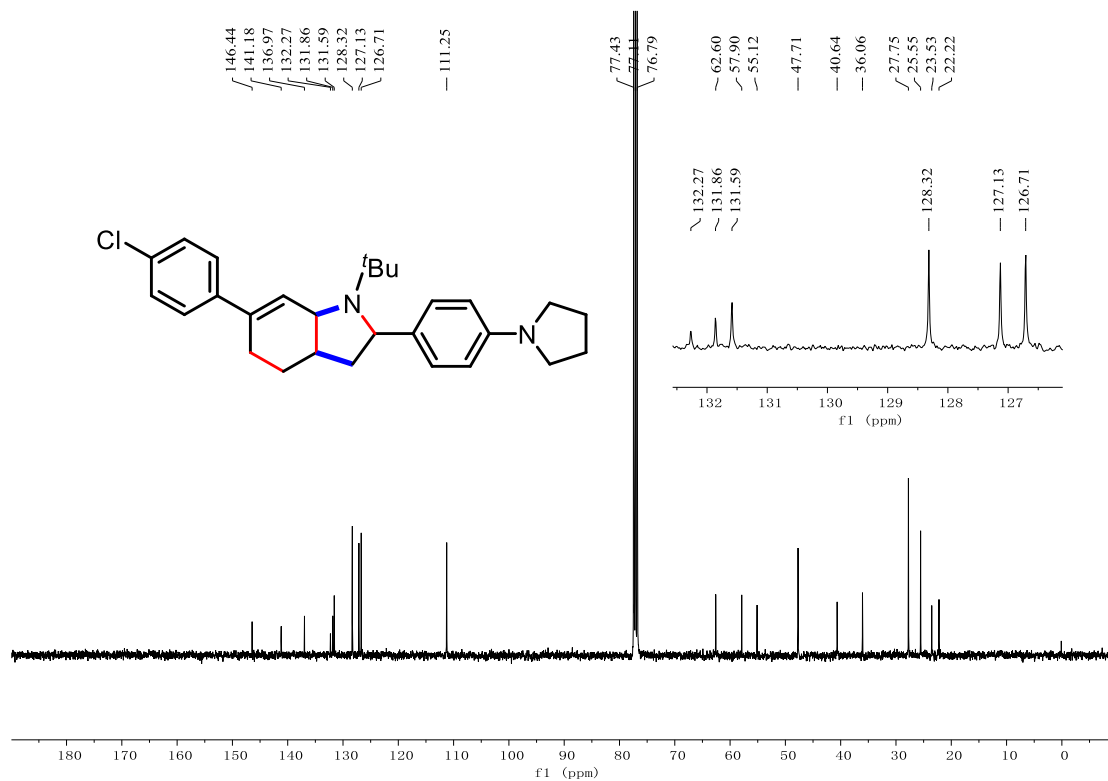

### $^1\text{H}$ NMR spectrum of *cis*-6da (400 MHz, $\text{CDCl}_3$ )

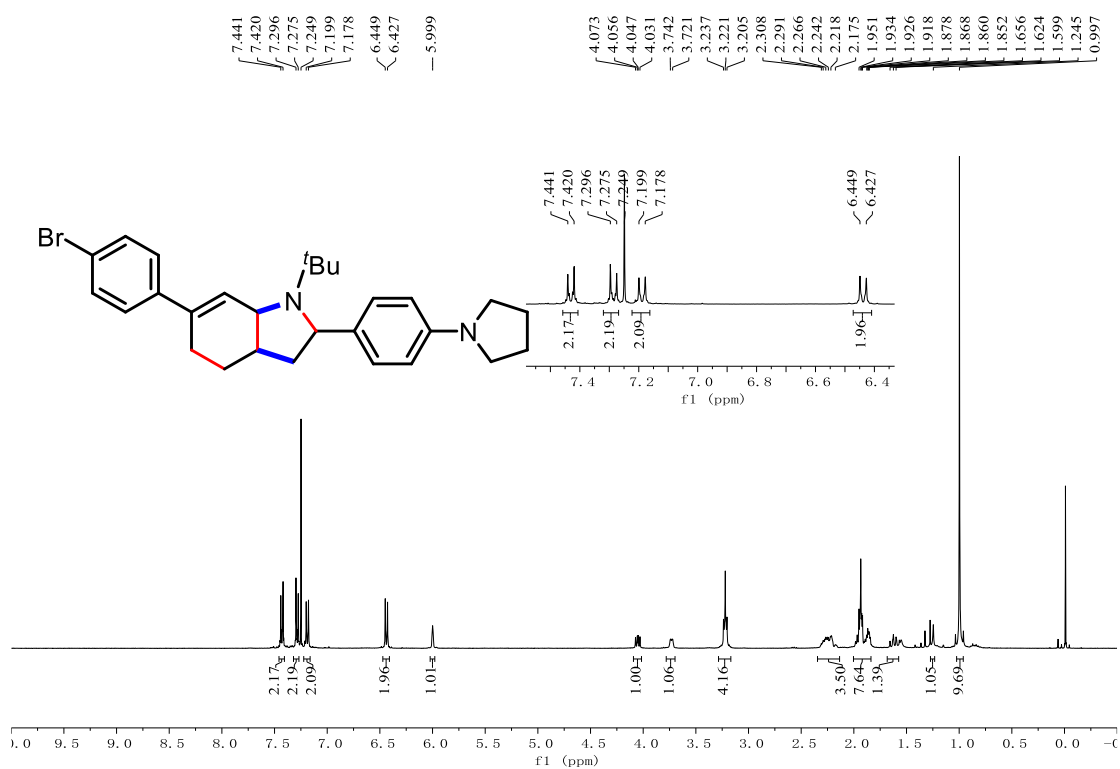

### $^{13}\text{C}$ NMR spectrum of *cis*-6da (101 MHz, $\text{CDCl}_3$ )

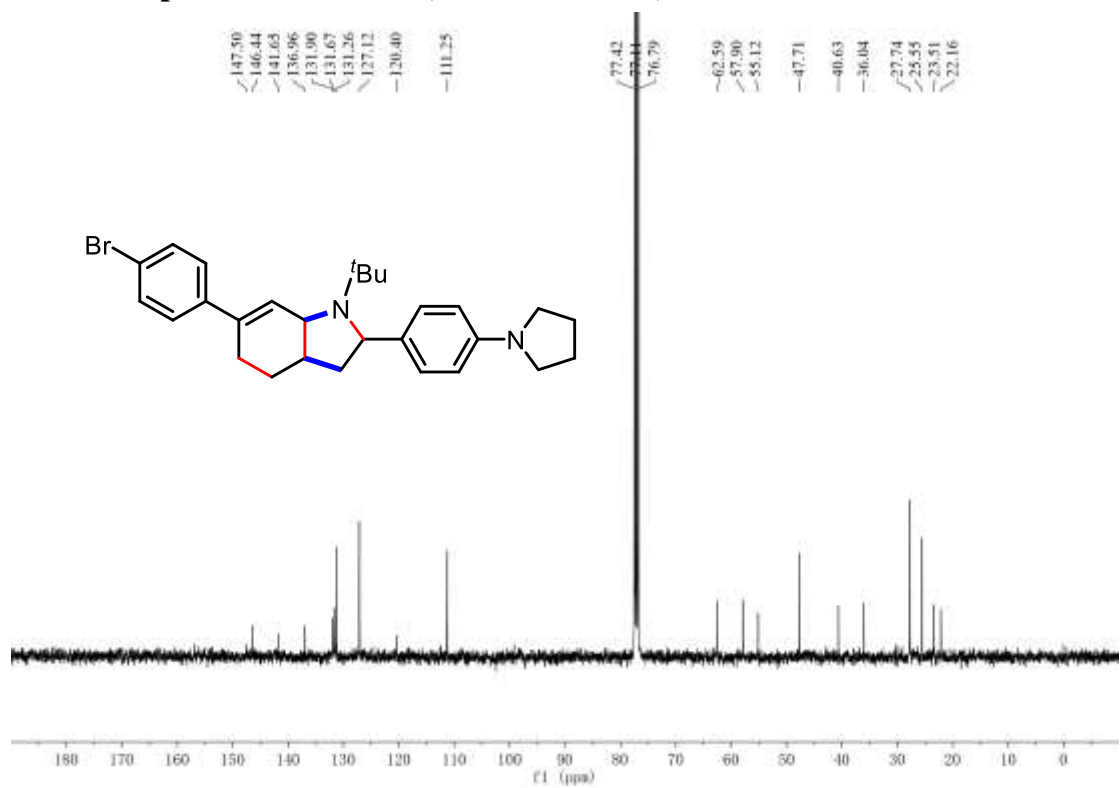

**<sup>1</sup>H NMR spectrum of *cis*-6ea (400 MHz, CDCl<sub>3</sub>)**

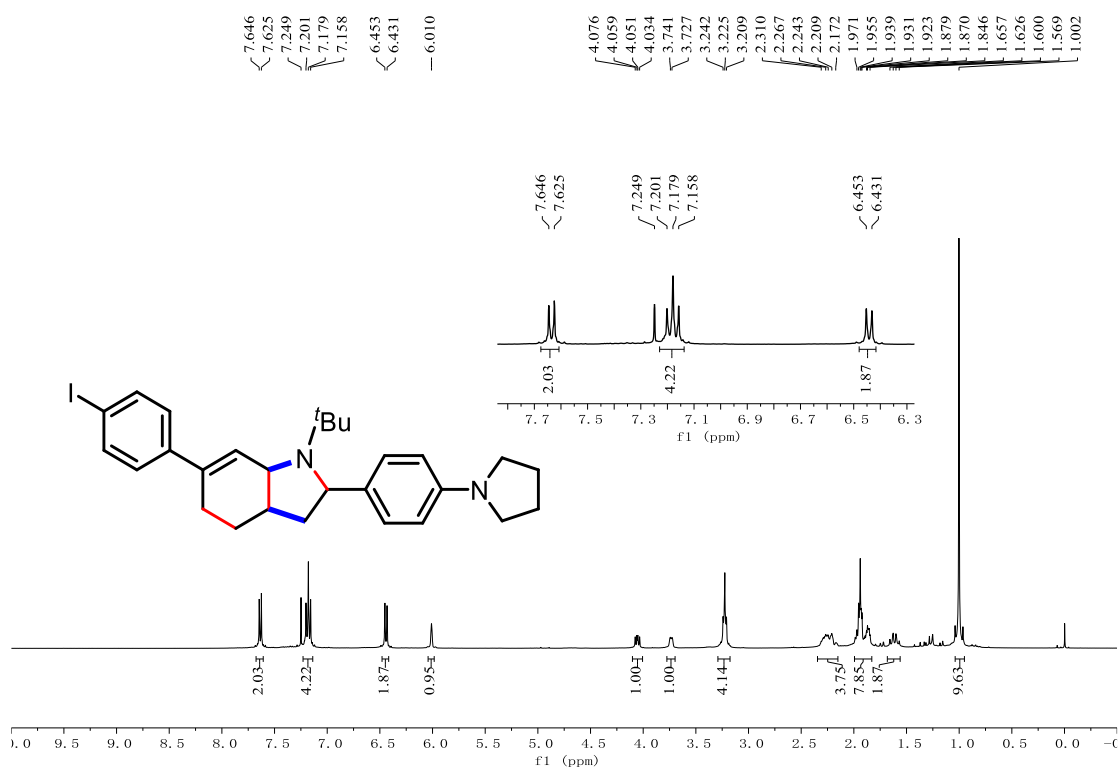

**<sup>13</sup>C NMR spectrum of *cis*-6ea (101 MHz, CDCl<sub>3</sub>)**

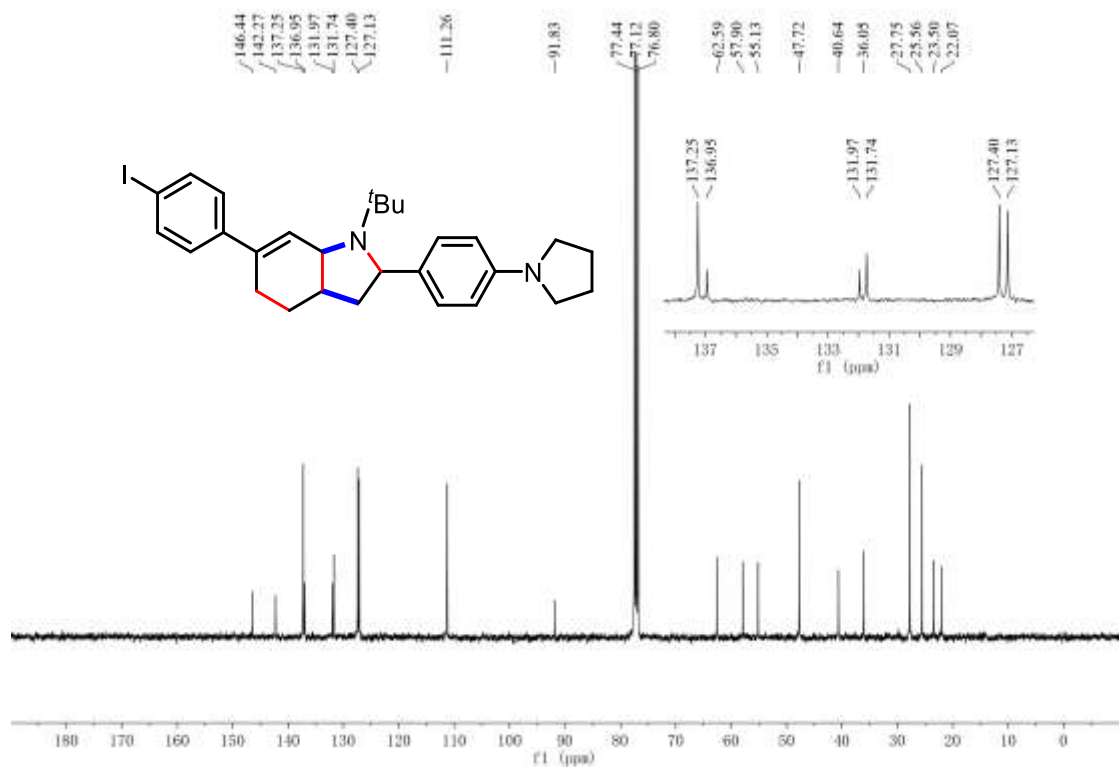

**<sup>1</sup>H NMR spectrum of *cis*-6fa (400 MHz, CDCl<sub>3</sub>)**

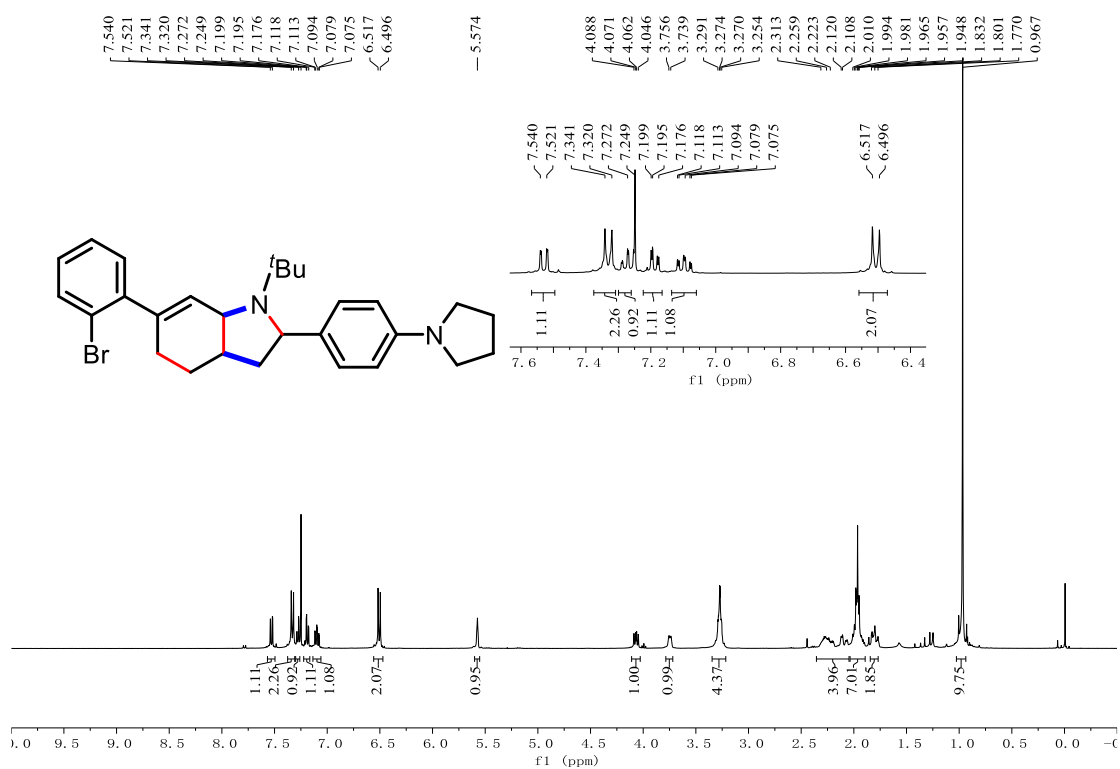

**<sup>13</sup>C NMR spectrum of *cis*-6fa (101 MHz, CDCl<sub>3</sub>)**

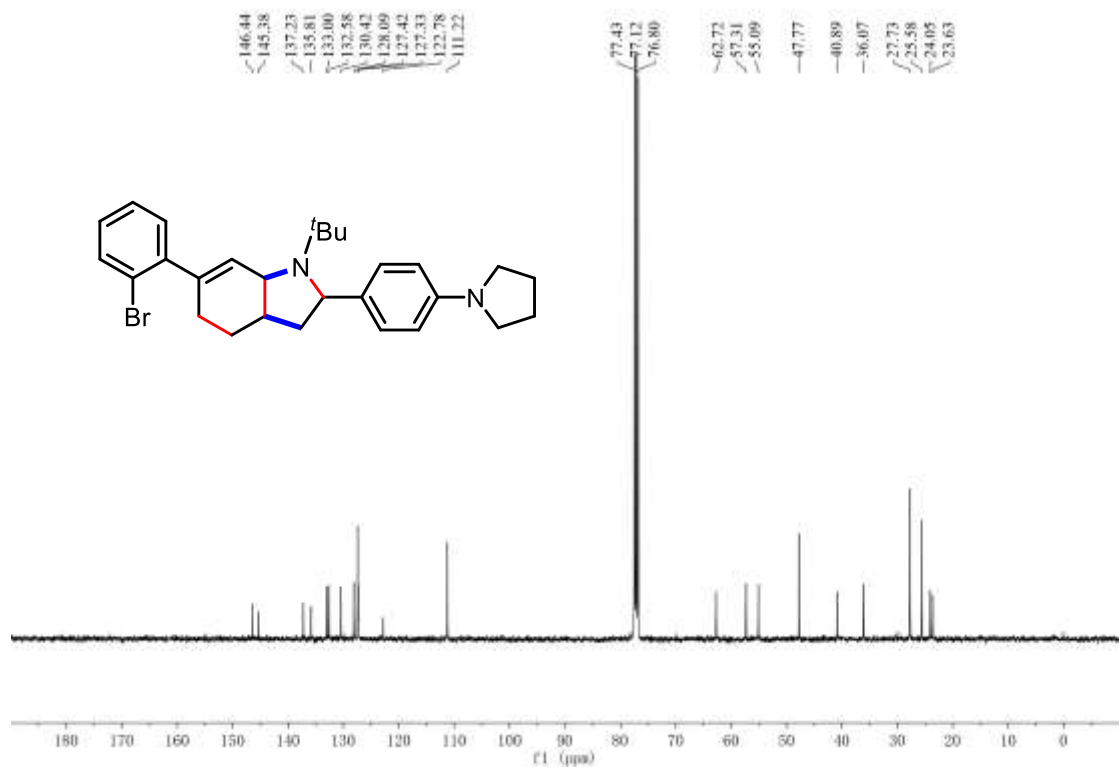

**<sup>1</sup>H NMR spectrum of *cis*-6ga (400 MHz, CDCl<sub>3</sub>)**

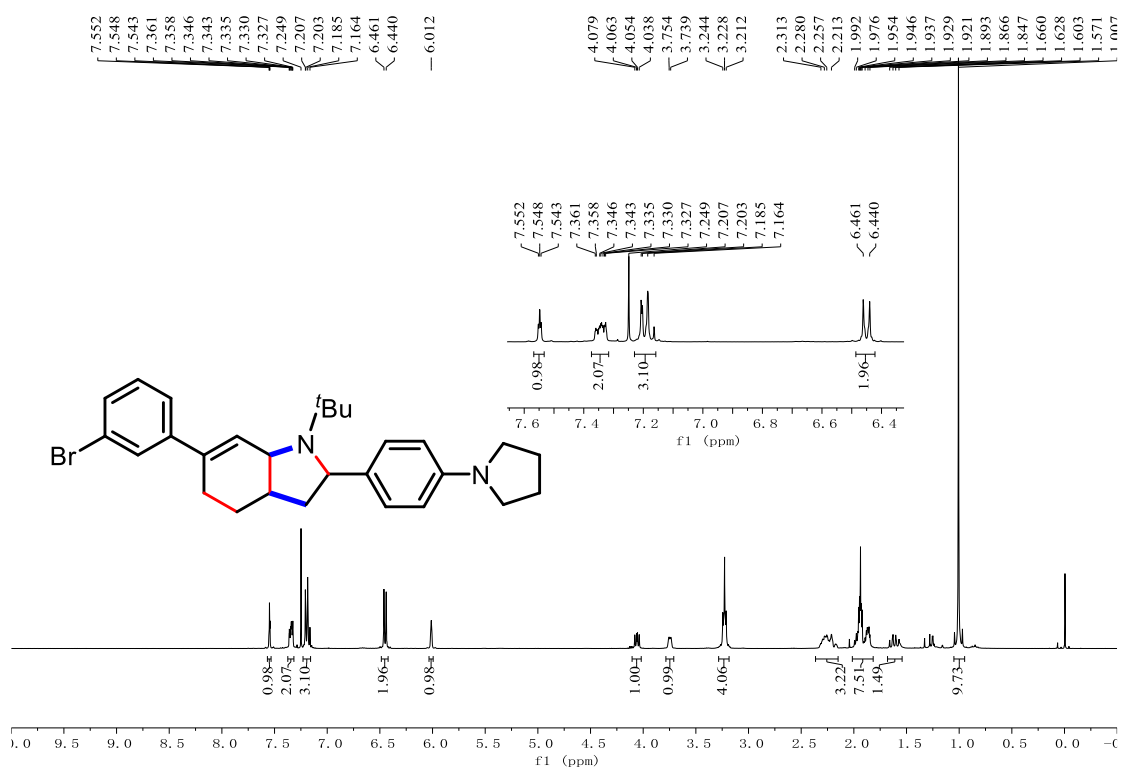

**<sup>13</sup>C NMR spectrum of *cis*-6ga (101 MHz, CDCl<sub>3</sub>)**

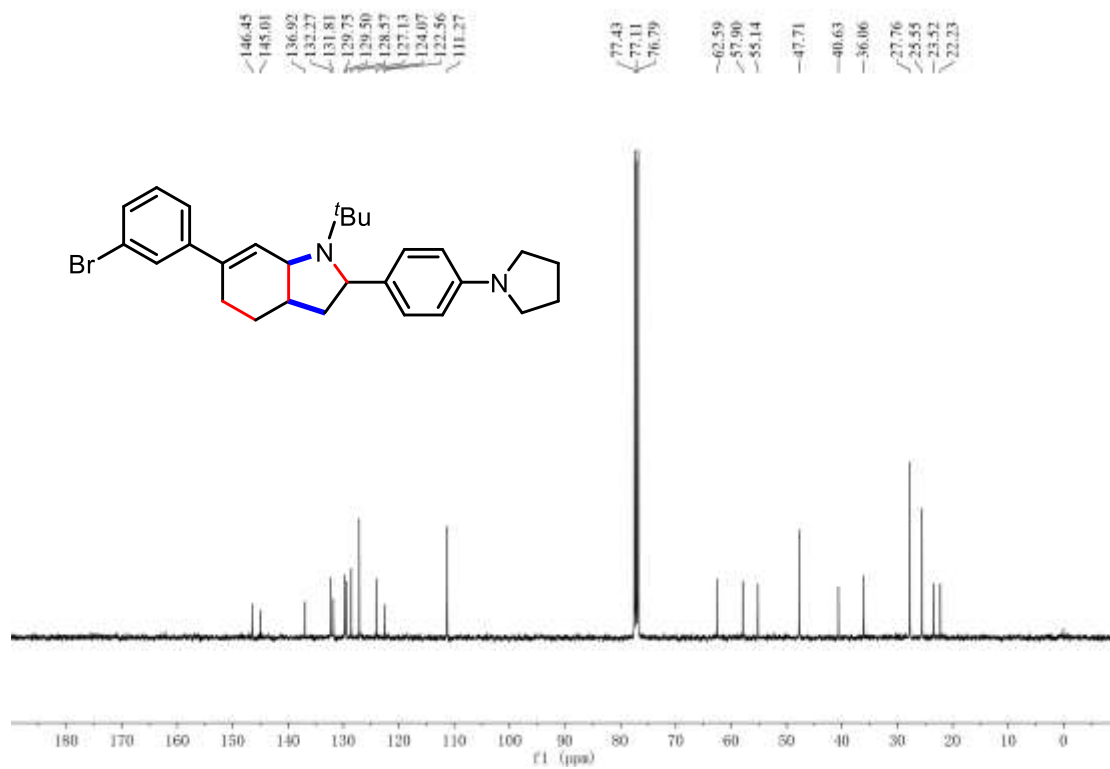

**<sup>1</sup>H NMR spectrum of *cis*-6ha (400 MHz, CDCl<sub>3</sub>)**

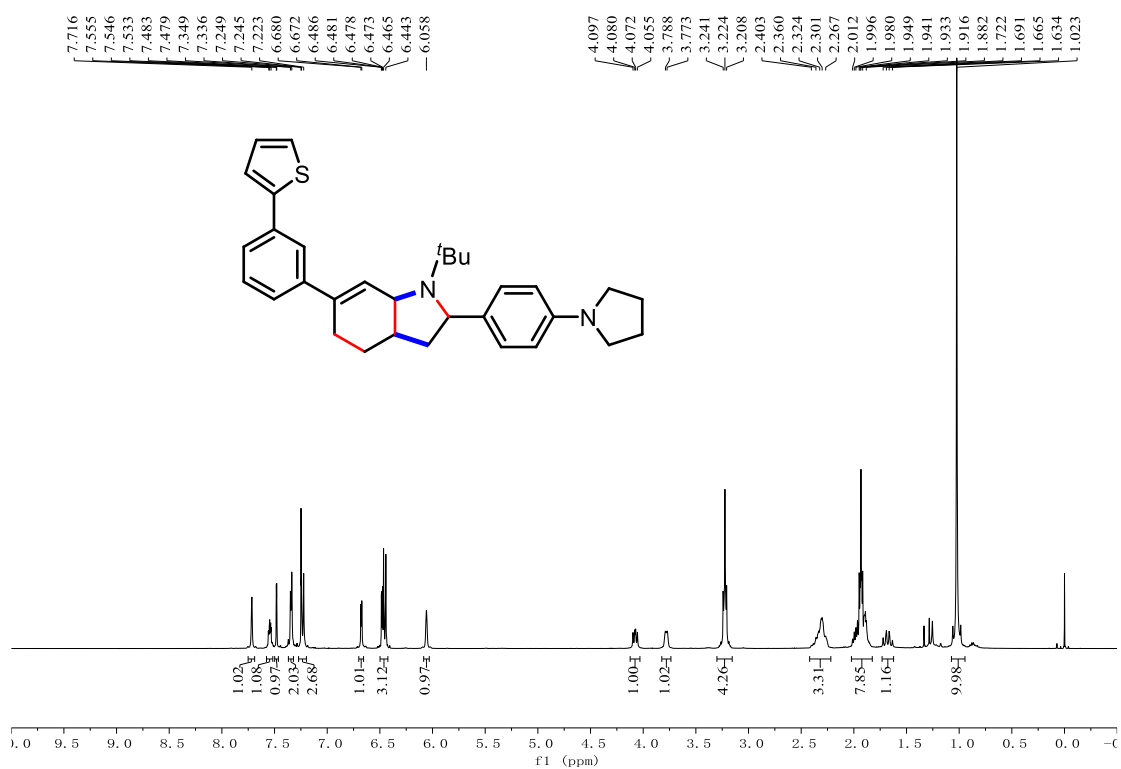

**<sup>13</sup>C NMR spectrum of *cis*-6ha (101 MHz, CDCl<sub>3</sub>)**

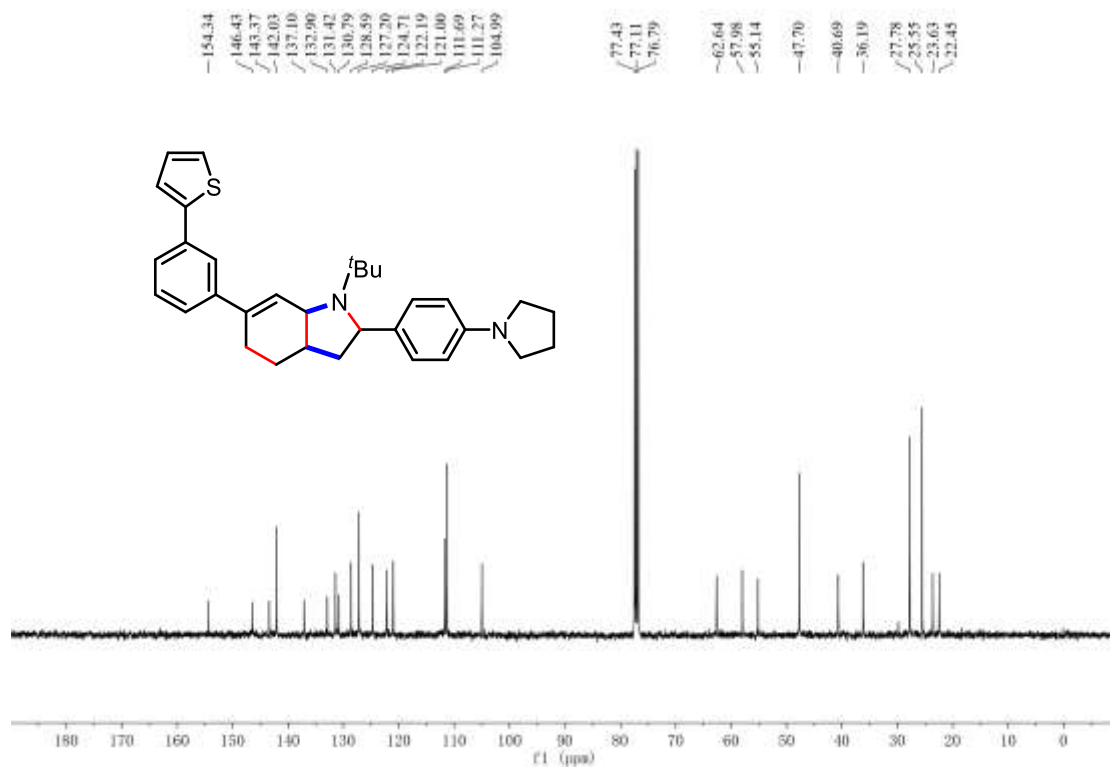

### $^1\text{H}$ NMR spectrum of *cis*-6ia (400 MHz, $\text{CDCl}_3$ )

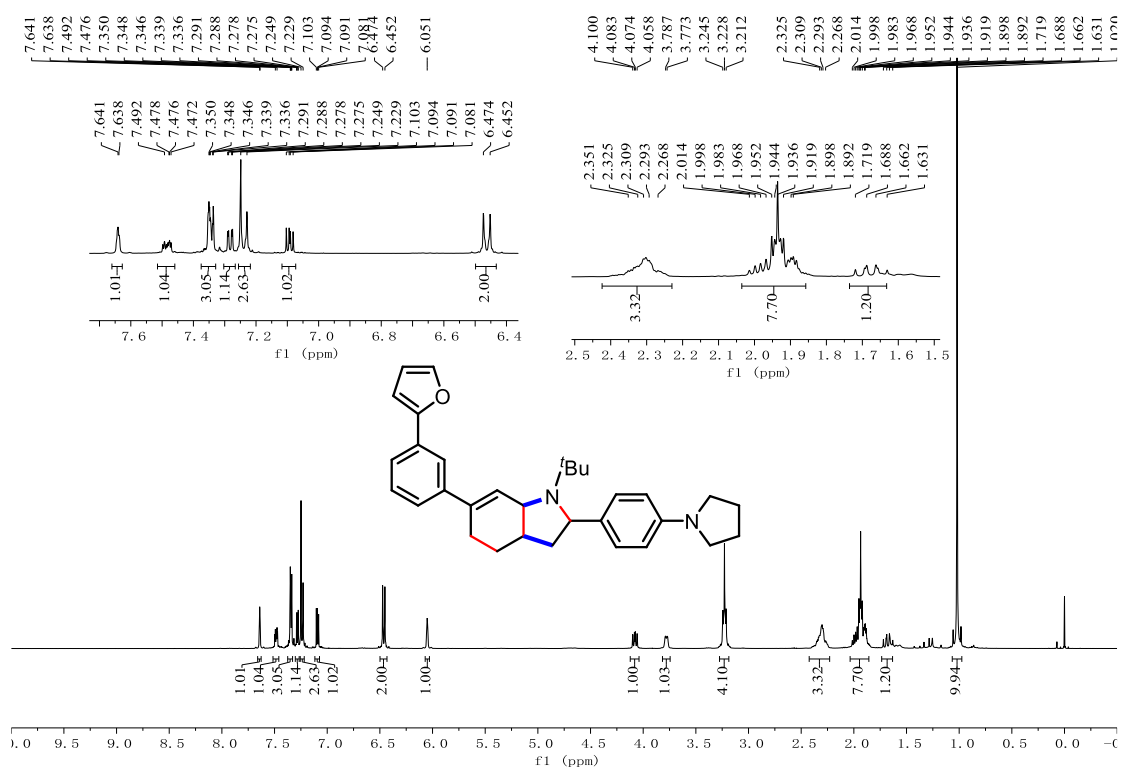

### $^{13}\text{C}$ NMR spectrum of *cis*-6ia (101 MHz, $\text{CDCl}_3$ )

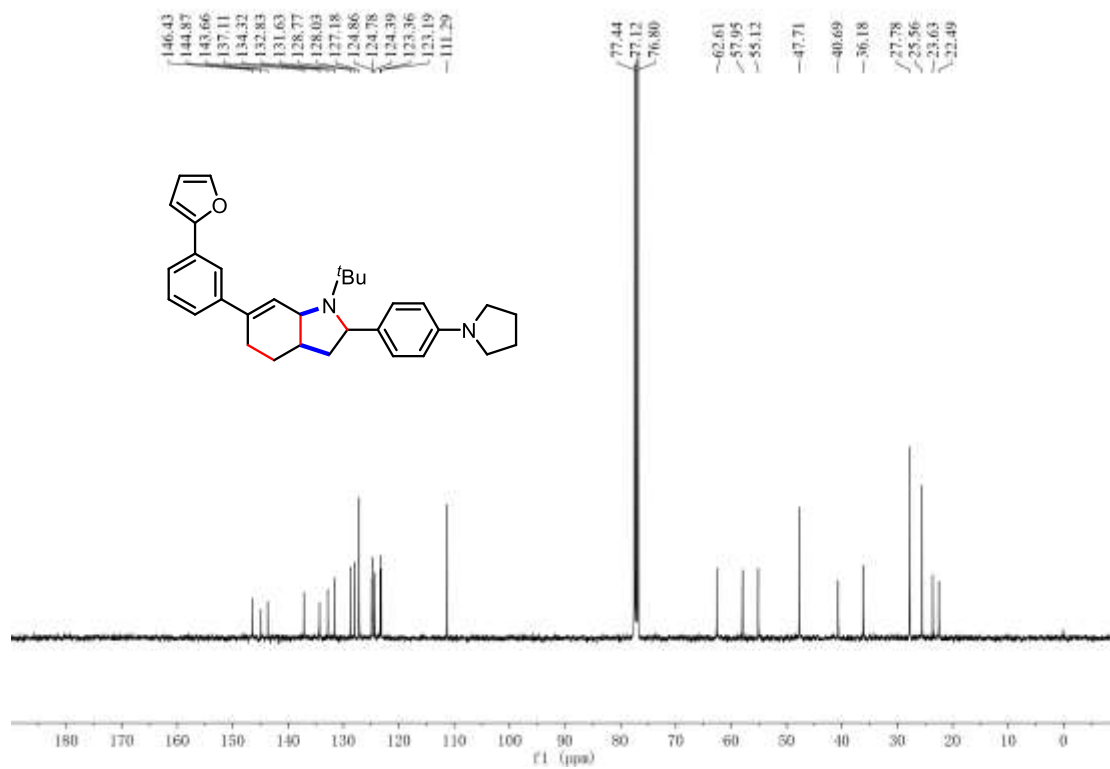

**<sup>1</sup>H NMR spectrum of *cis*-6ja (400 MHz, CDCl<sub>3</sub>)**

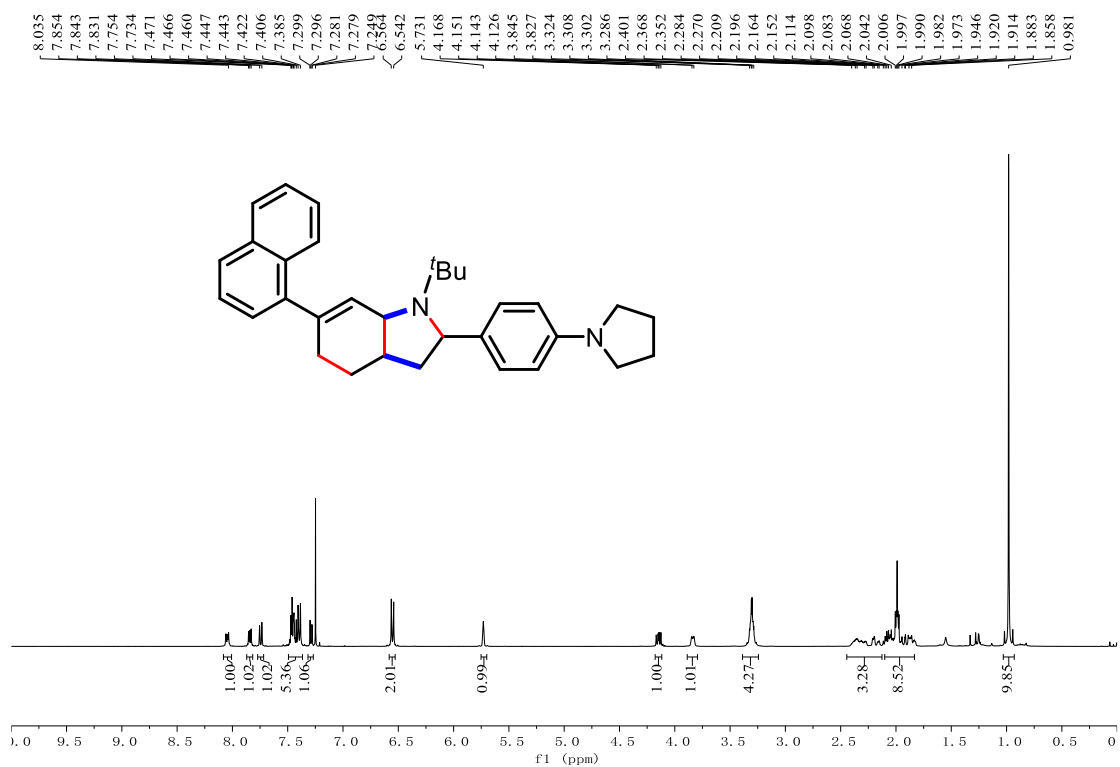

**<sup>13</sup>C NMR spectrum of *cis*-6ja (101 MHz, CDCl<sub>3</sub>)**

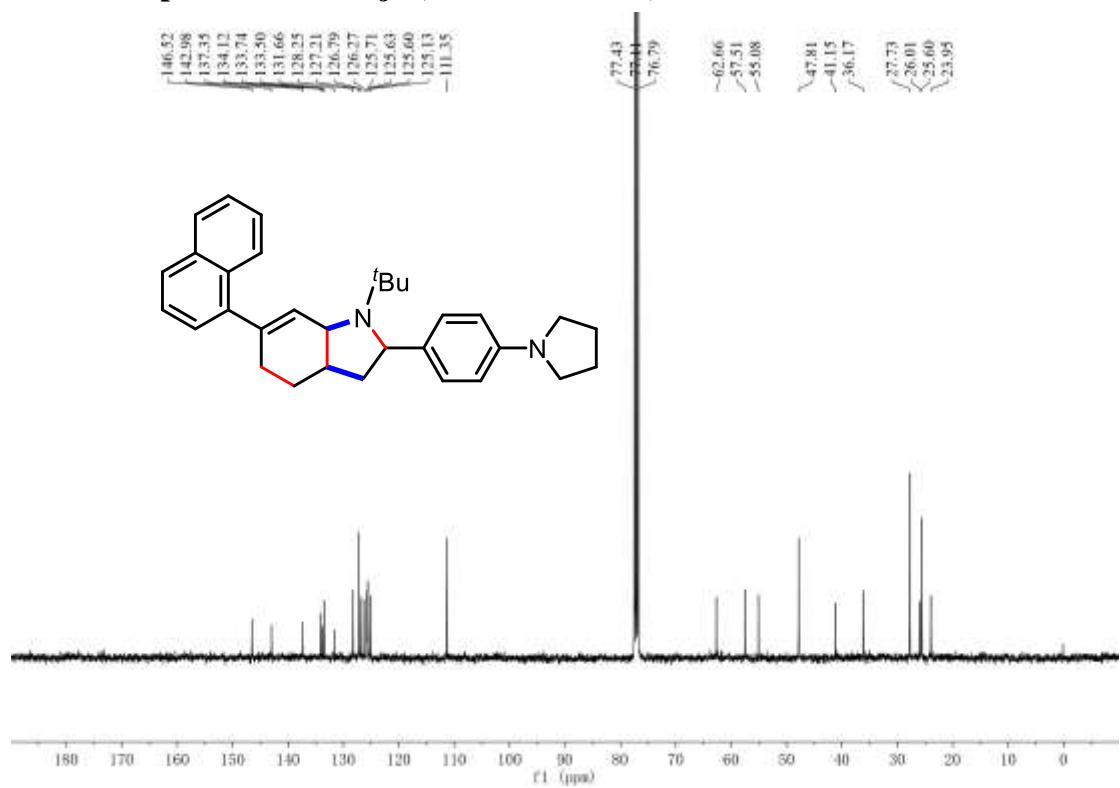

### $^1\text{H}$ NMR spectrum of *cis*-6ab (400 MHz, $\text{CDCl}_3$ )

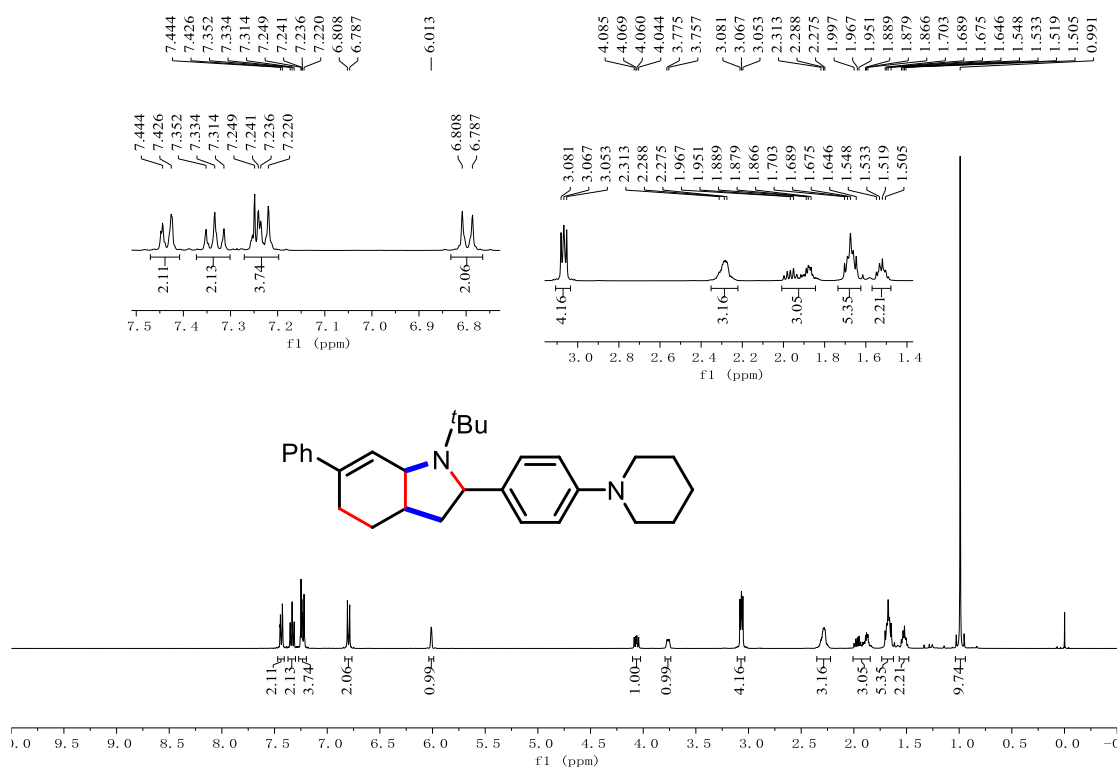

### $^{13}\text{C}$ NMR spectrum of *cis*-6ab (101 MHz, $\text{CDCl}_3$ )

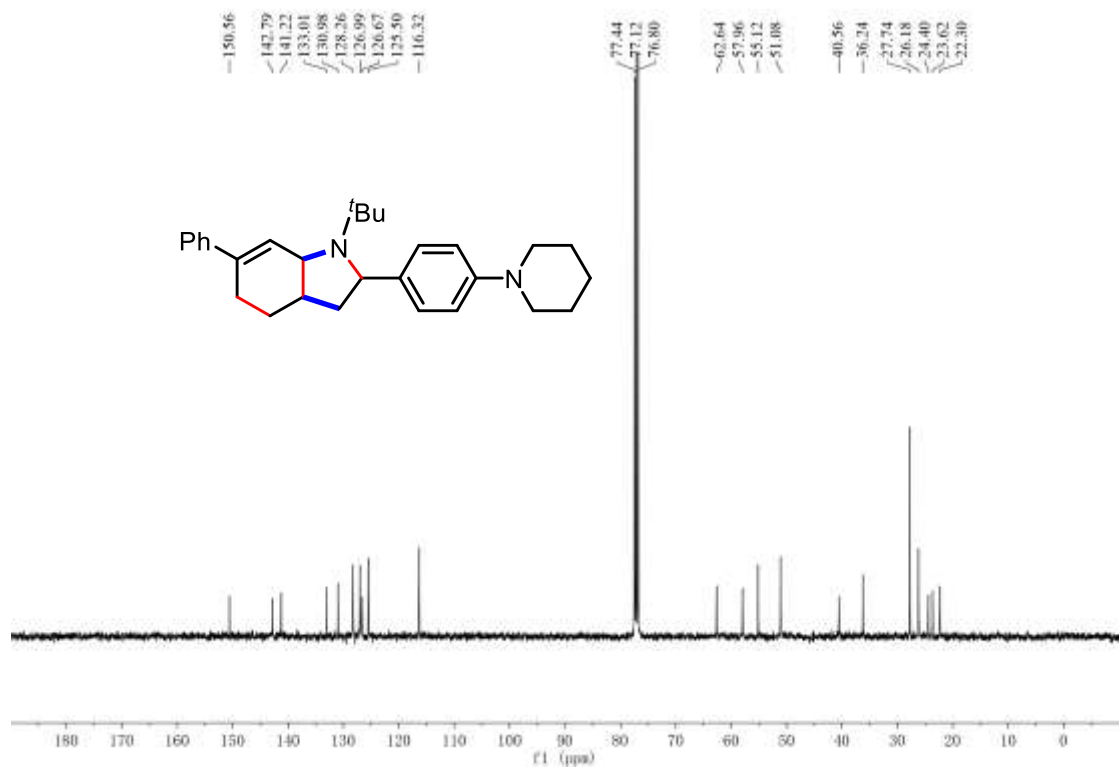

**<sup>1</sup>H NMR spectrum of *cis*-6ac (400 MHz, CDCl<sub>3</sub>)**

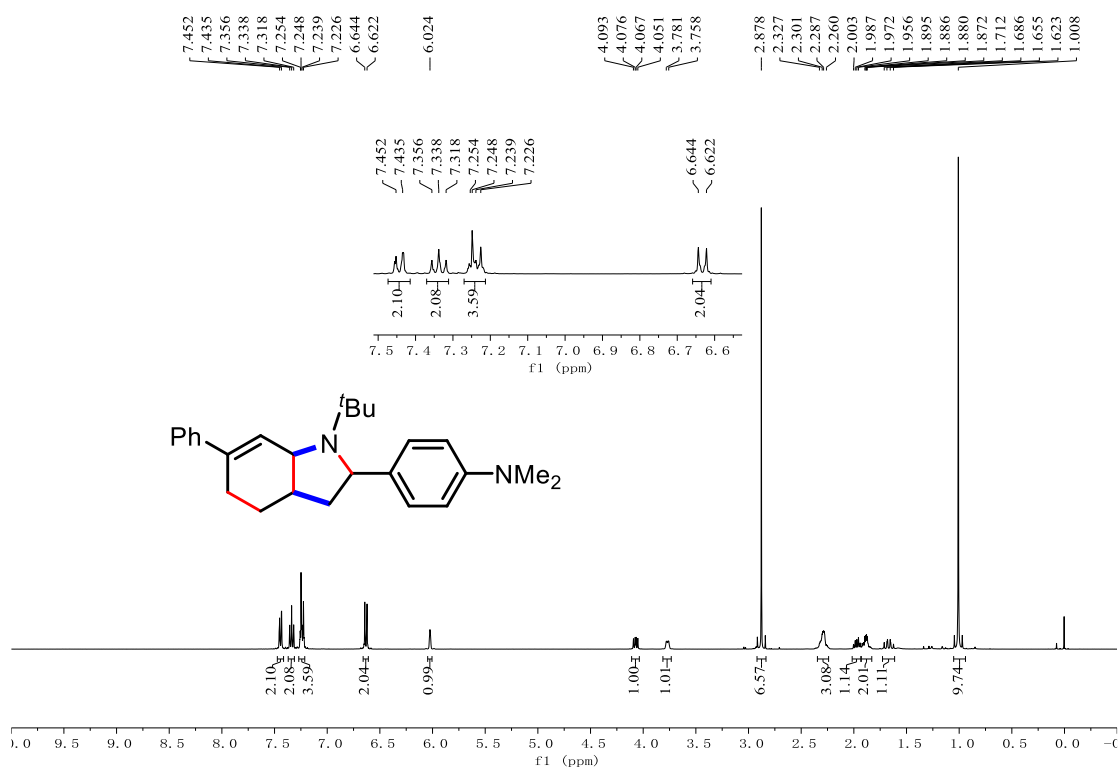

**<sup>13</sup>C NMR spectrum of *cis*-6ac (101 MHz, CDCl<sub>3</sub>)**

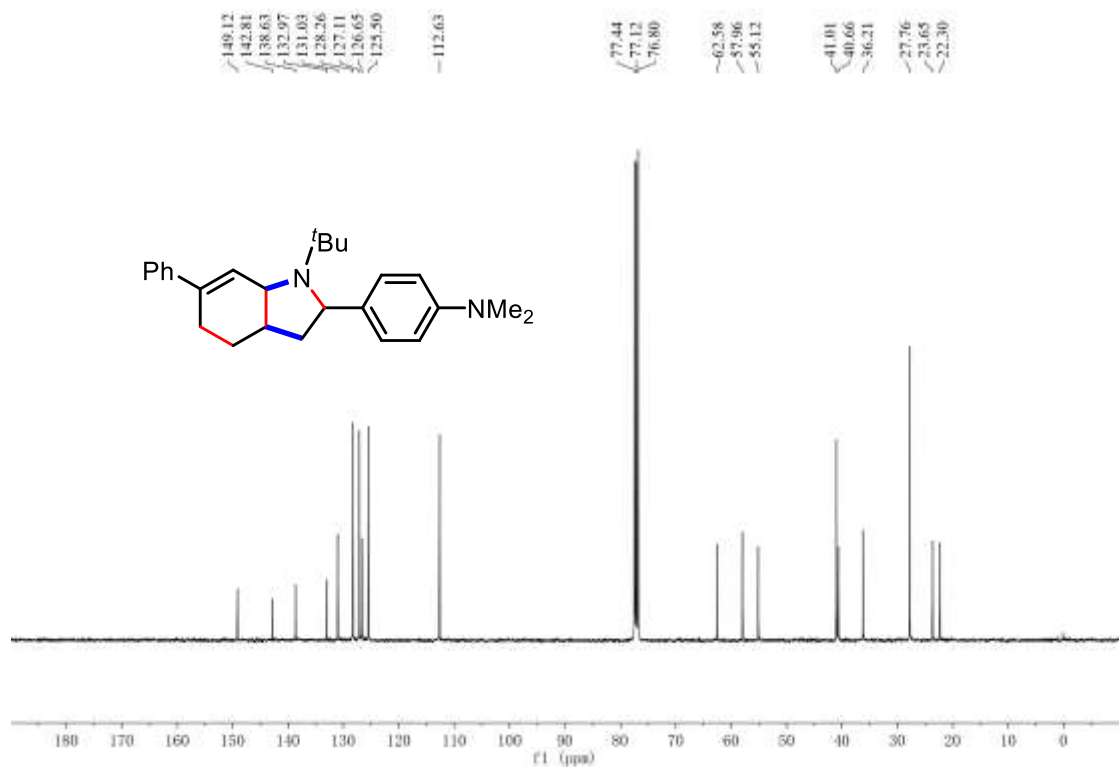

**<sup>1</sup>H NMR spectrum of *cis*-6ad (400 MHz, CDCl<sub>3</sub>)**

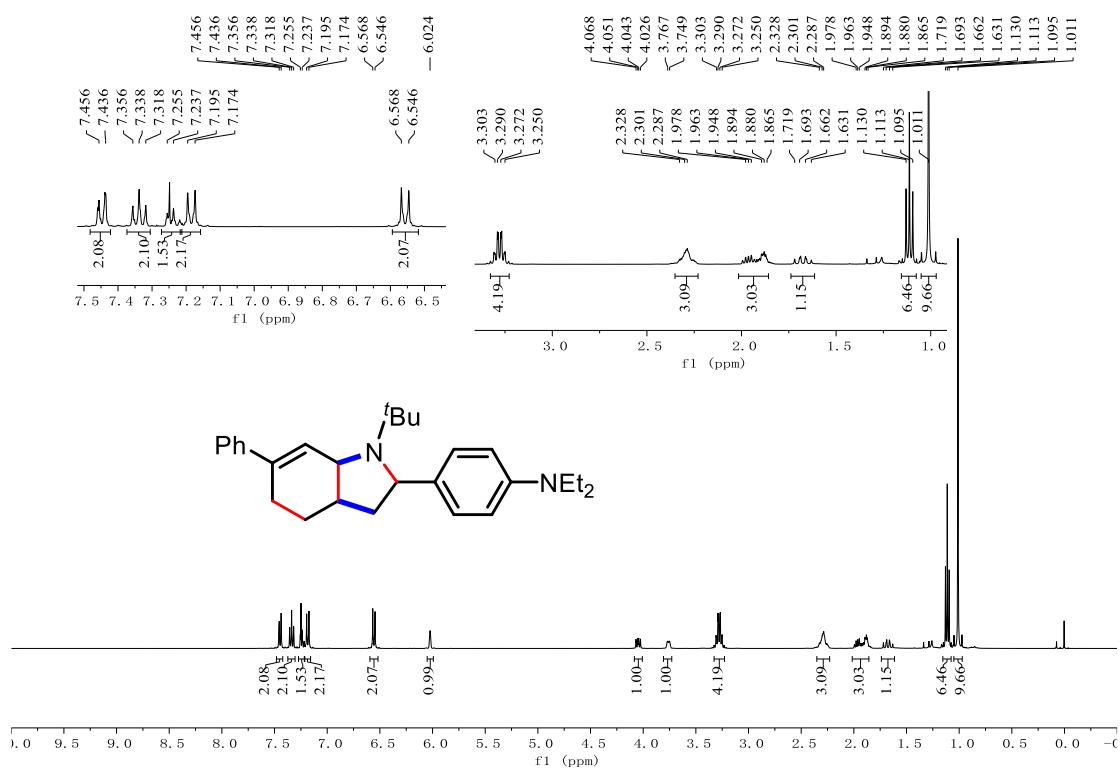

**<sup>13</sup>C NMR spectrum of *cis*-6ad (101 MHz, CDCl<sub>3</sub>)**

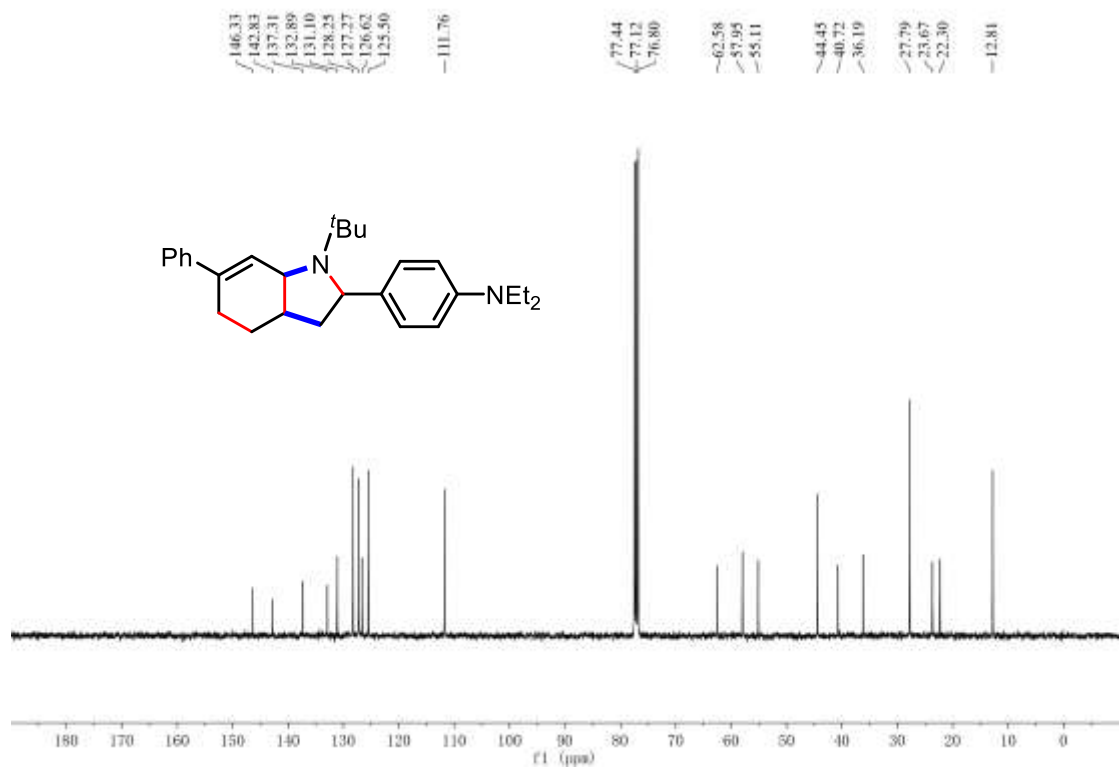

### $^1\text{H}$ NMR spectrum of 7aa (400 MHz, $\text{CDCl}_3$ )

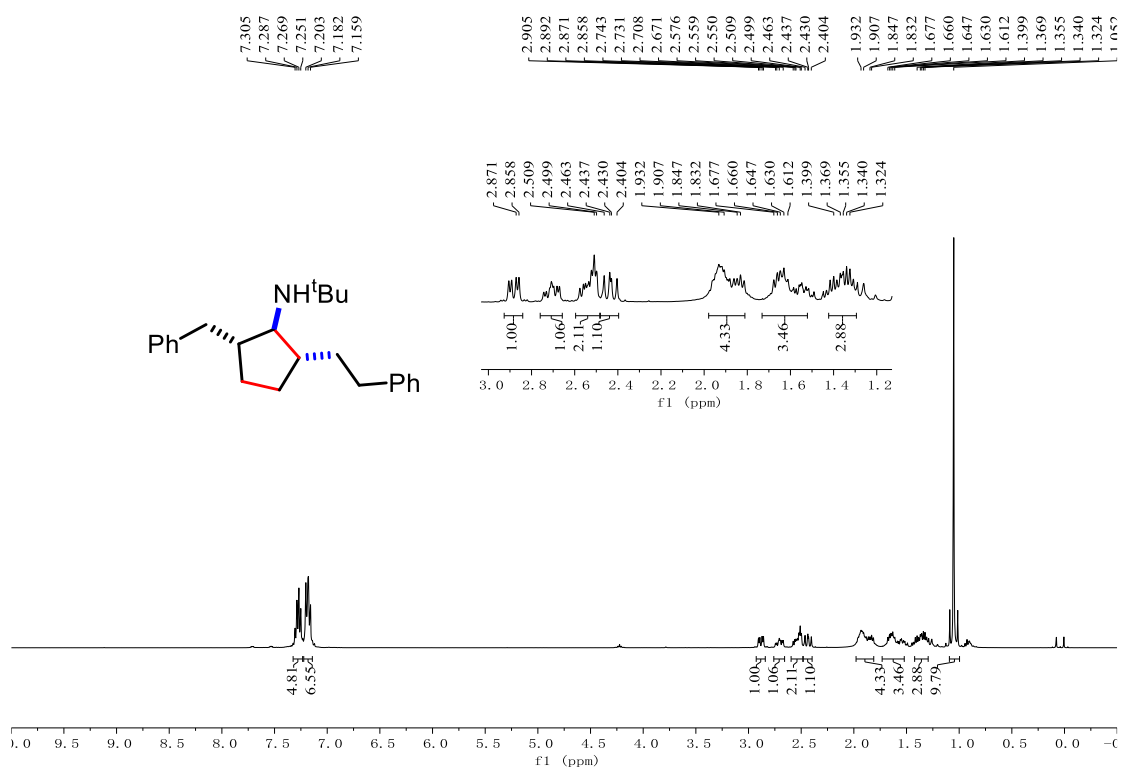

### $^{13}\text{C}$ NMR spectrum of 7aa (101 MHz, $\text{CDCl}_3$ )

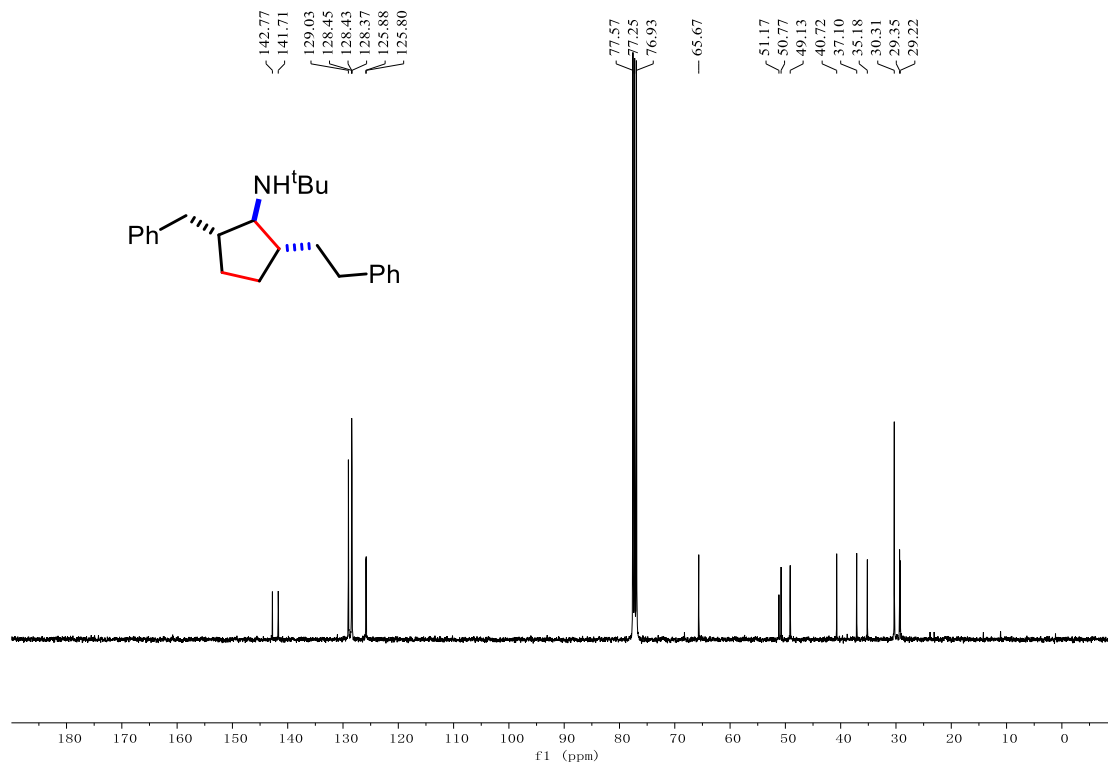

### <sup>135</sup>DEPT spectrum of 7aa

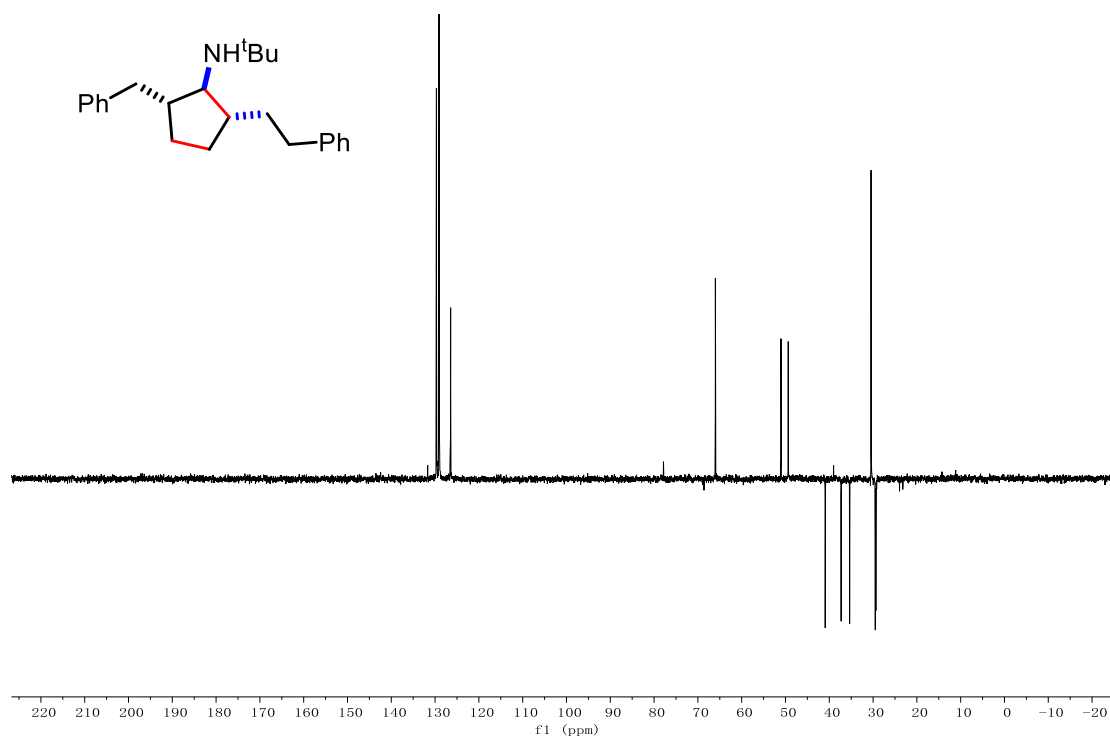

### HMBC spectrum of 7aa

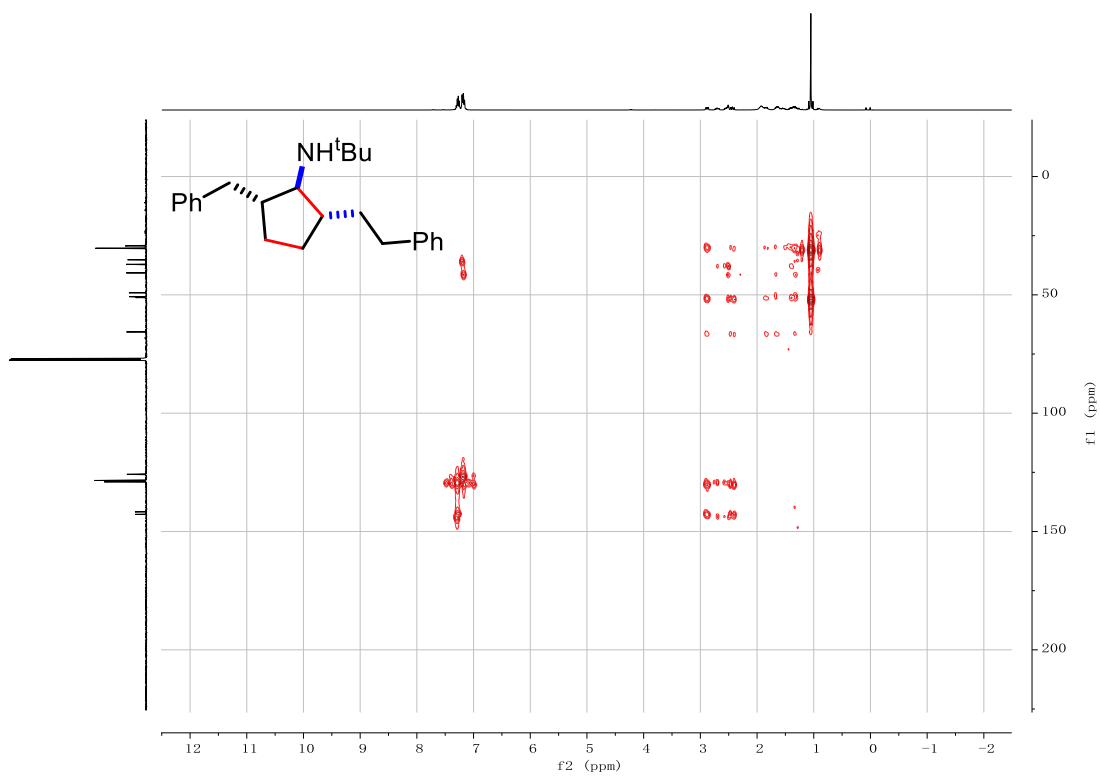

HSQC spectrum of 7aa

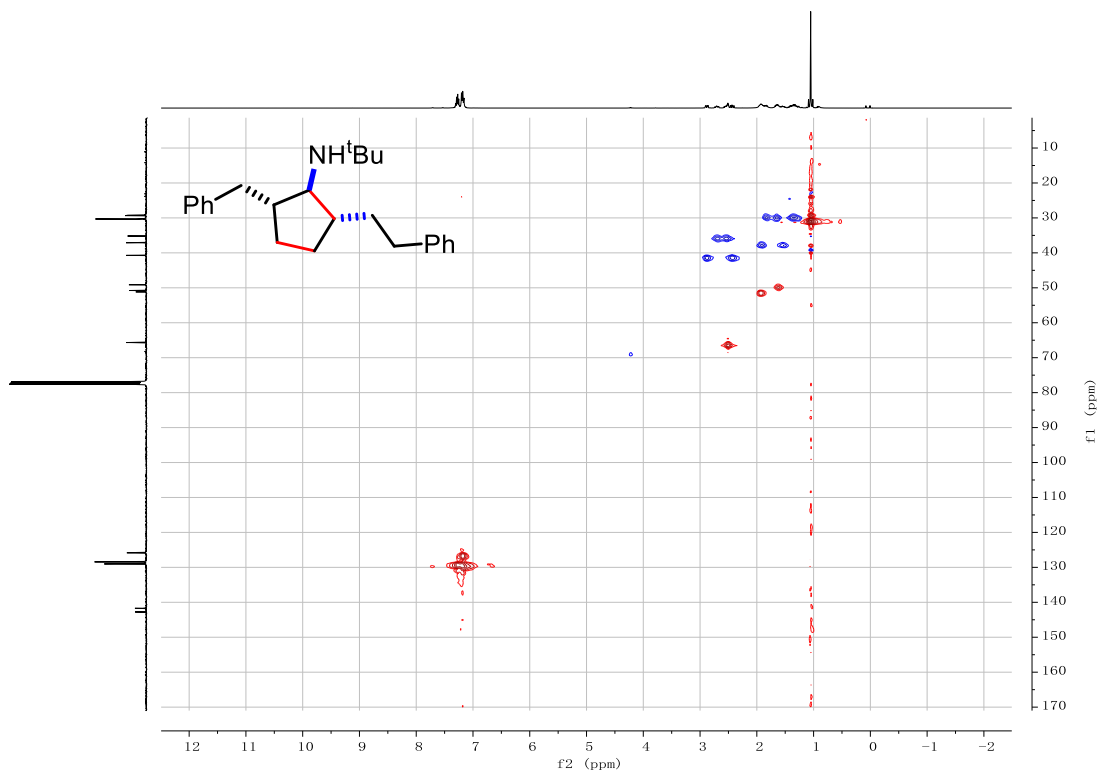

HMQC spectrum of 7aa

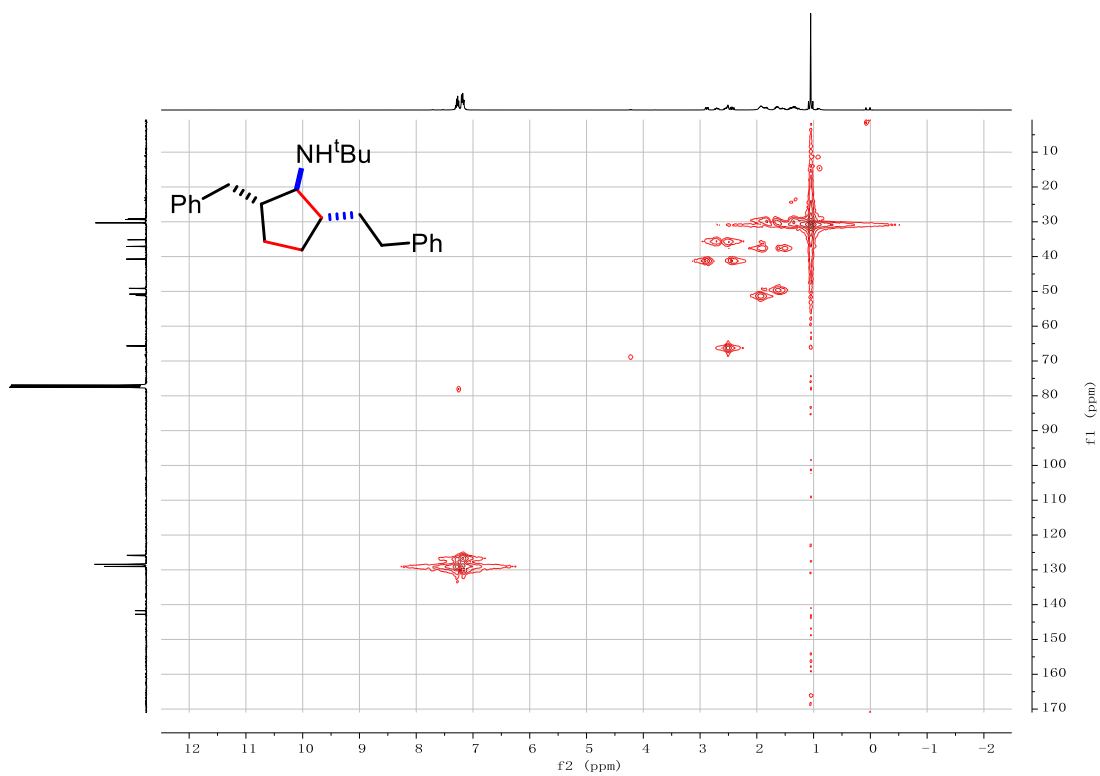

### COSY NMR spectrum of 7aa

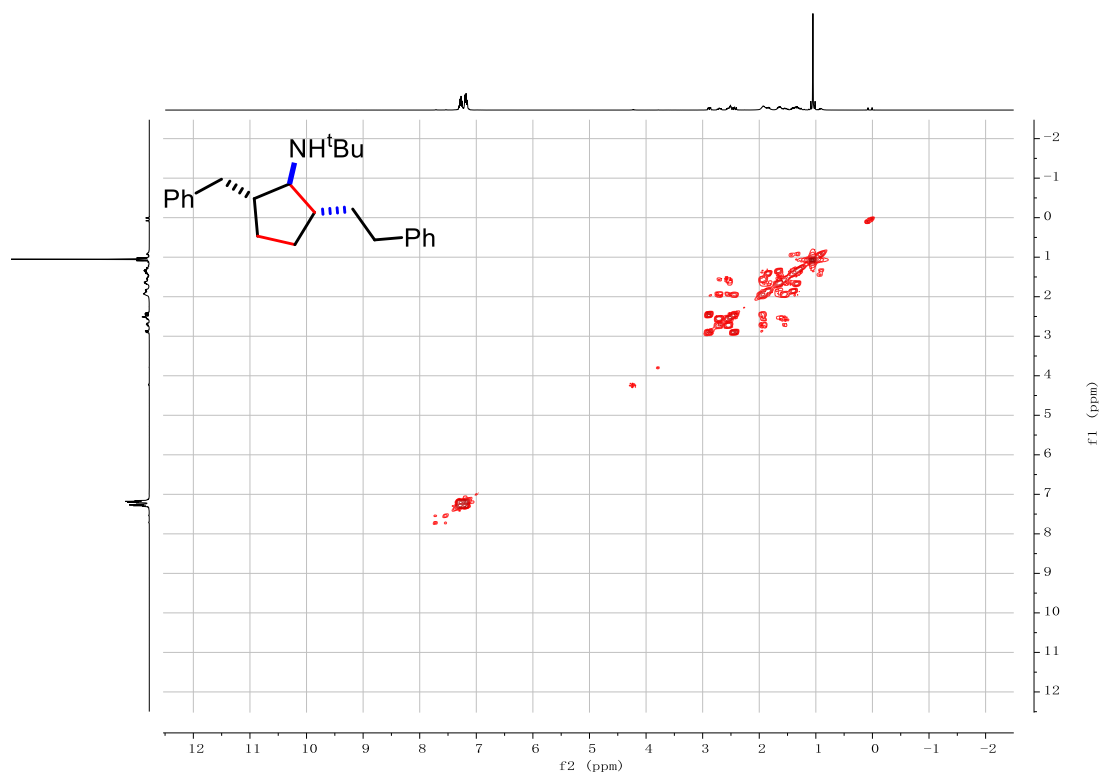

### NOE spectrum of 7aa

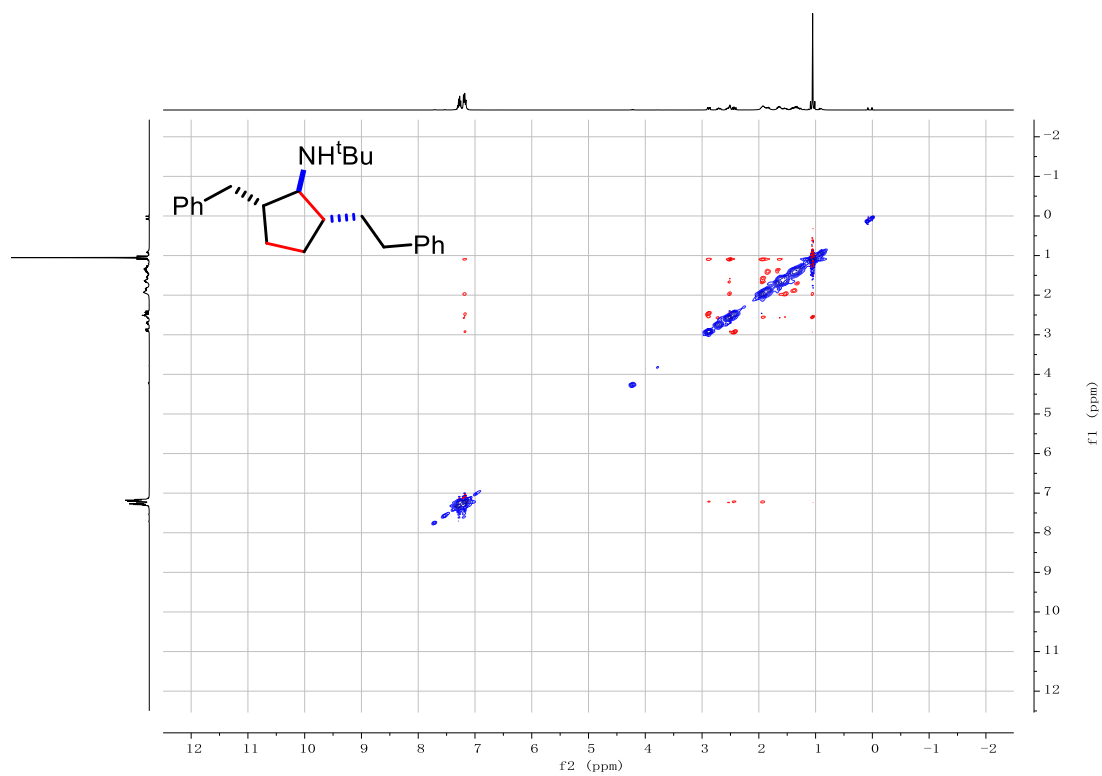

### <sup>1</sup>H NMR spectrum of 7aa' (400 MHz, CDCl<sub>3</sub>)

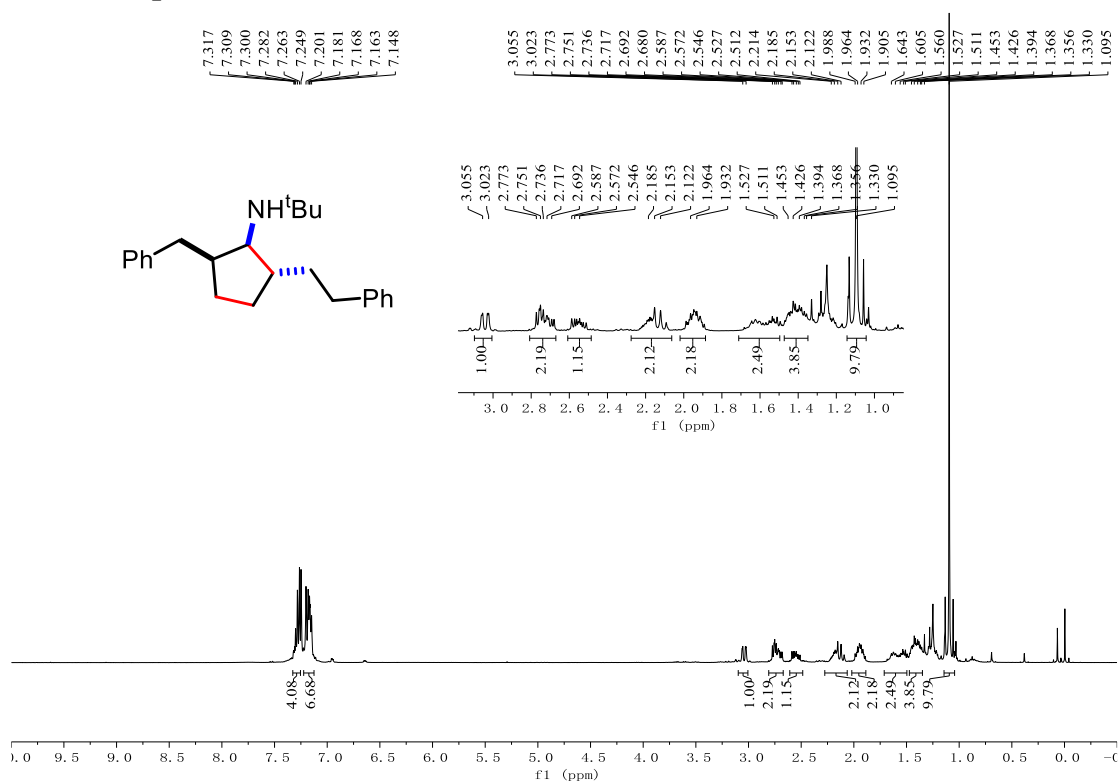

### <sup>13</sup>C NMR spectrum of 7aa' (101 MHz, CDCl<sub>3</sub>)

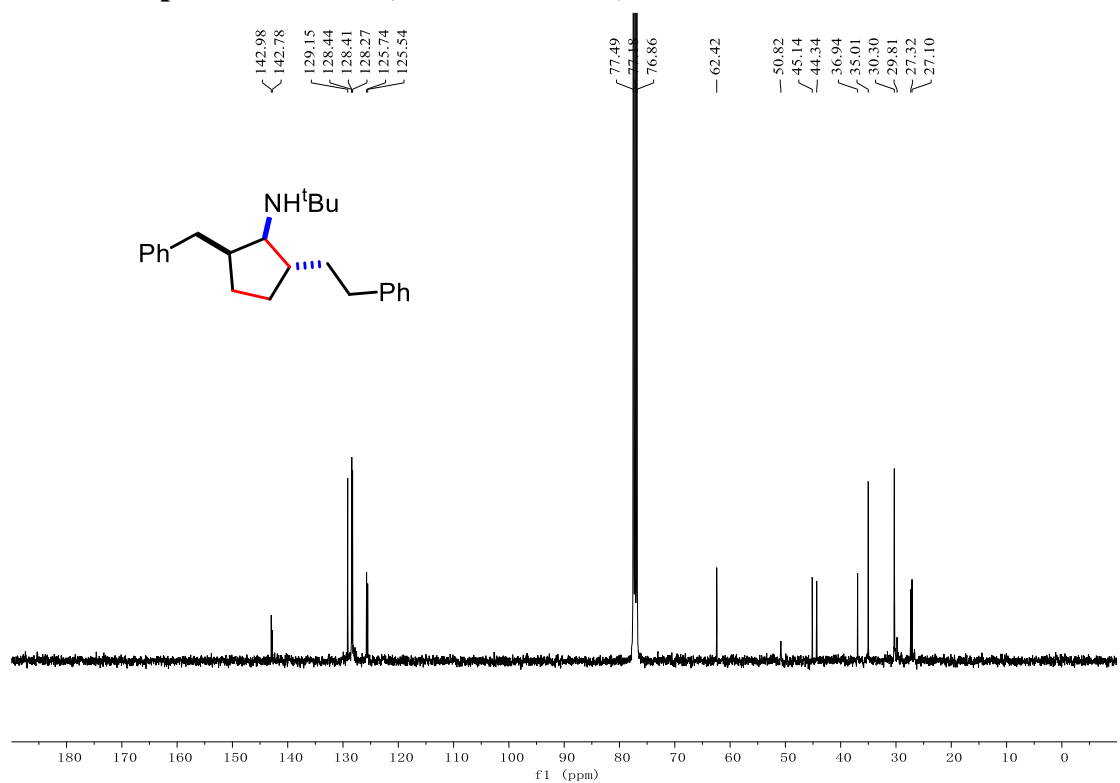

### <sup>135</sup>DEPT spectrum of 7aa'

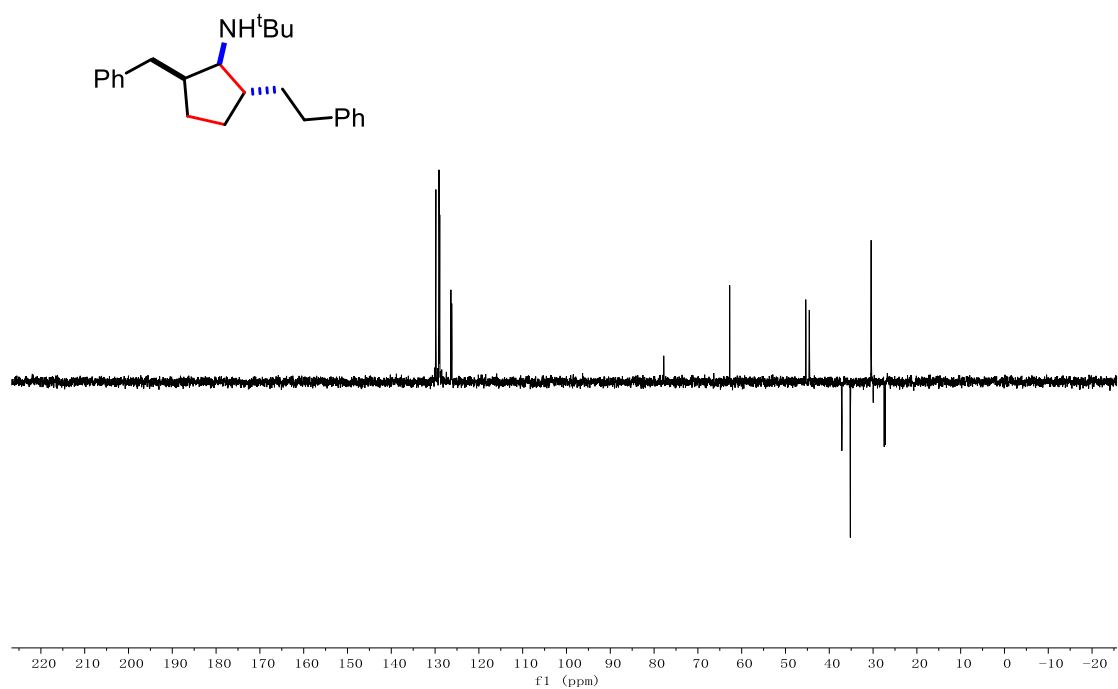

### HMBC spectrum of 7aa'

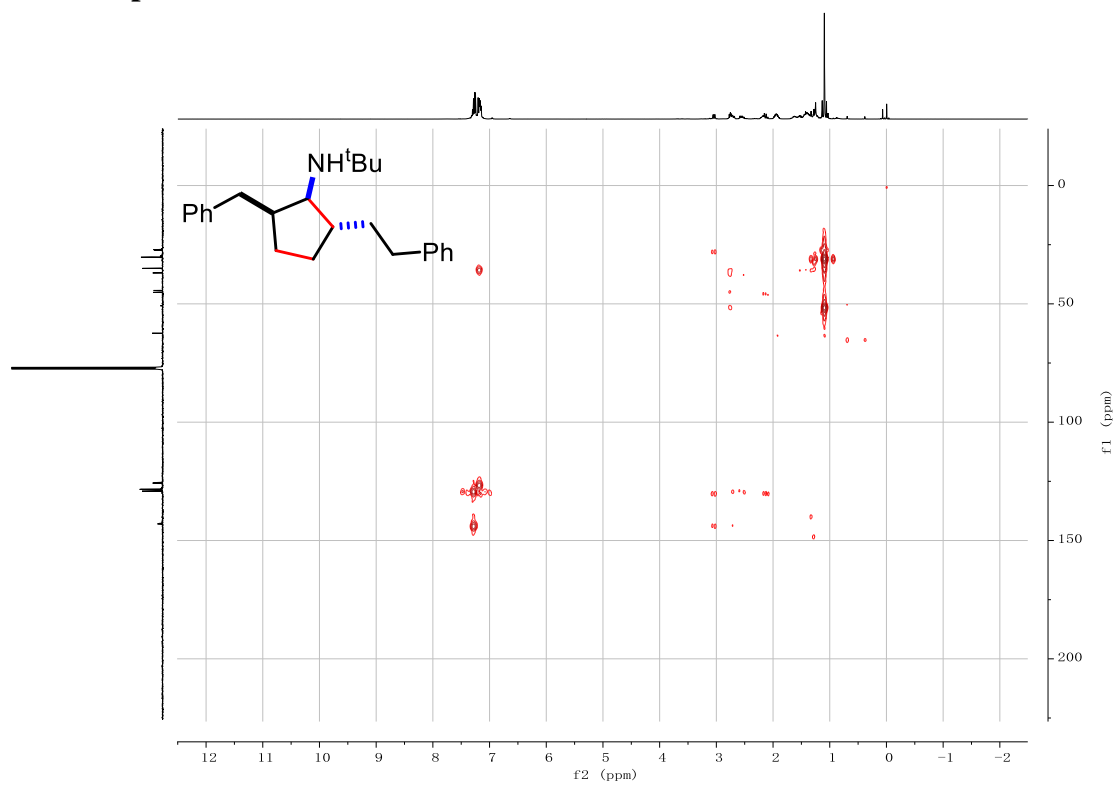

HSQC spectrum of 7aa'

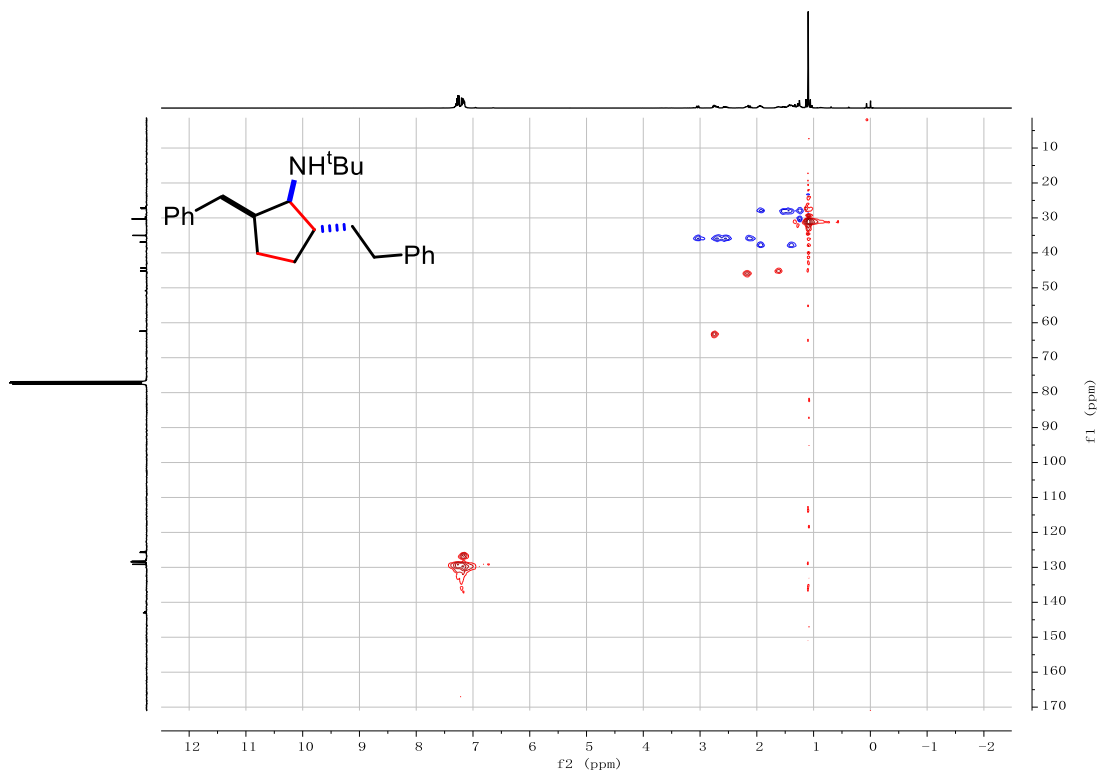

HMQC spectrum of 7aa'

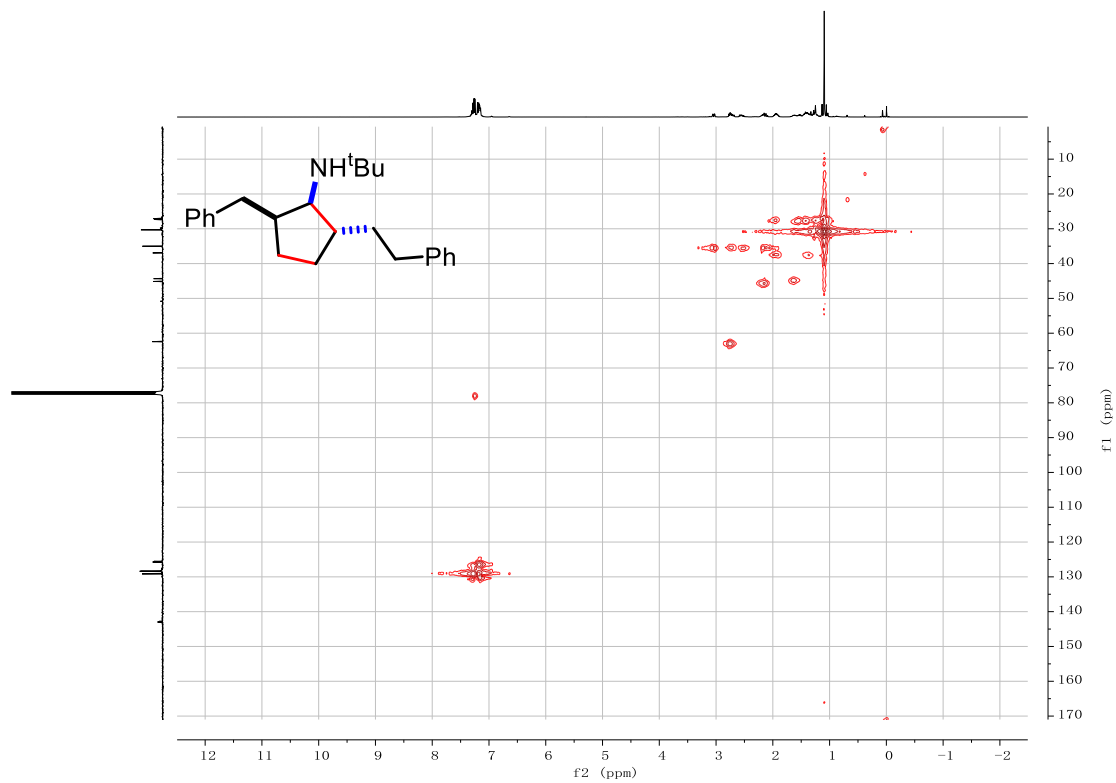

COSY spectrum of 7aa'

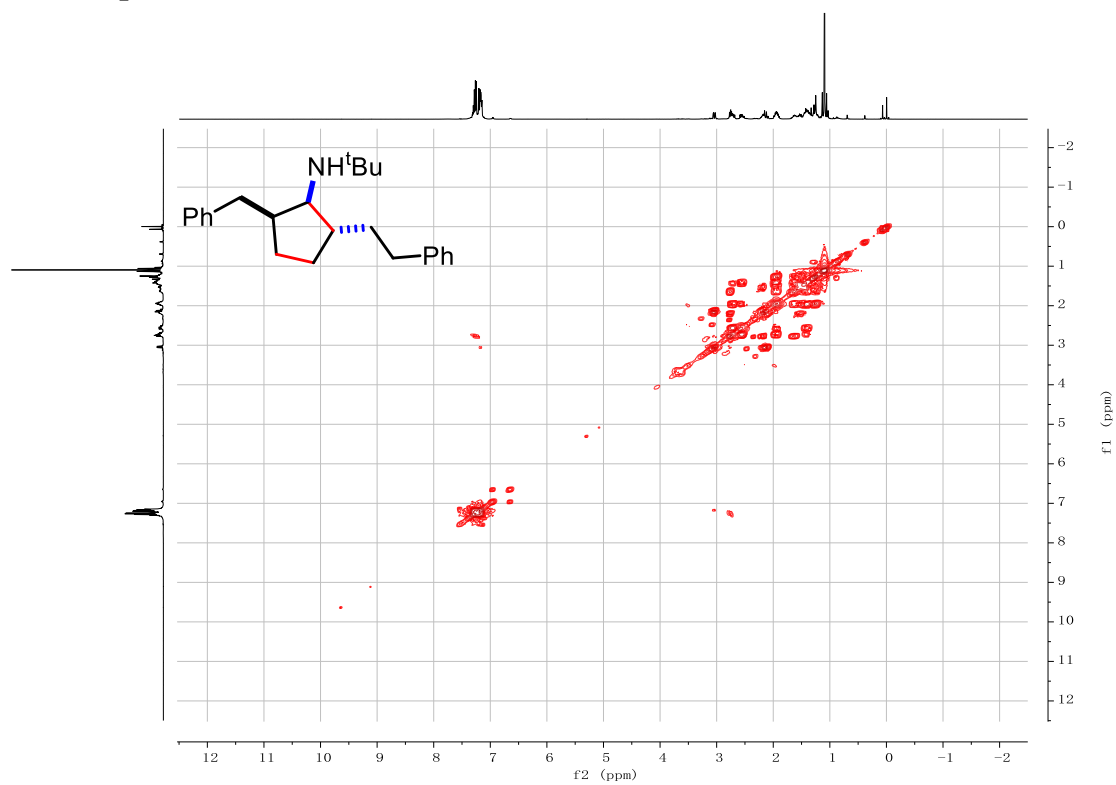

NOE spectrum of 7aa'

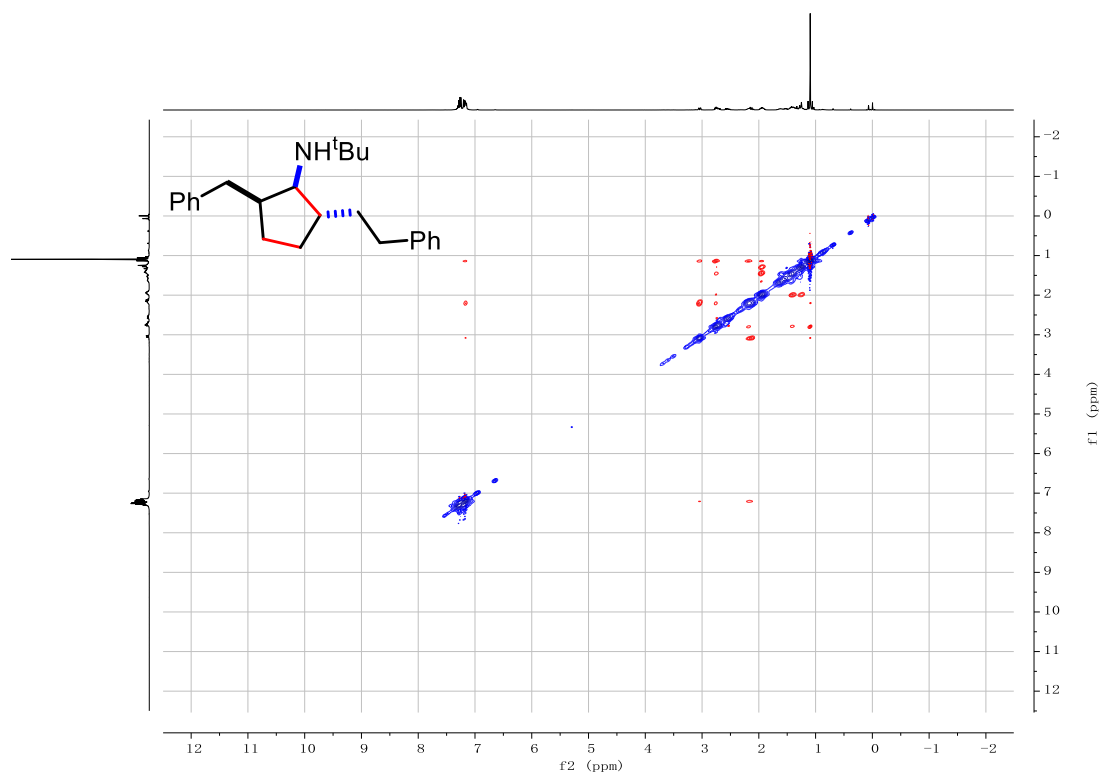

### $^1\text{H}$ NMR spectrum of **8aa** (400 MHz, $\text{CDCl}_3$ )

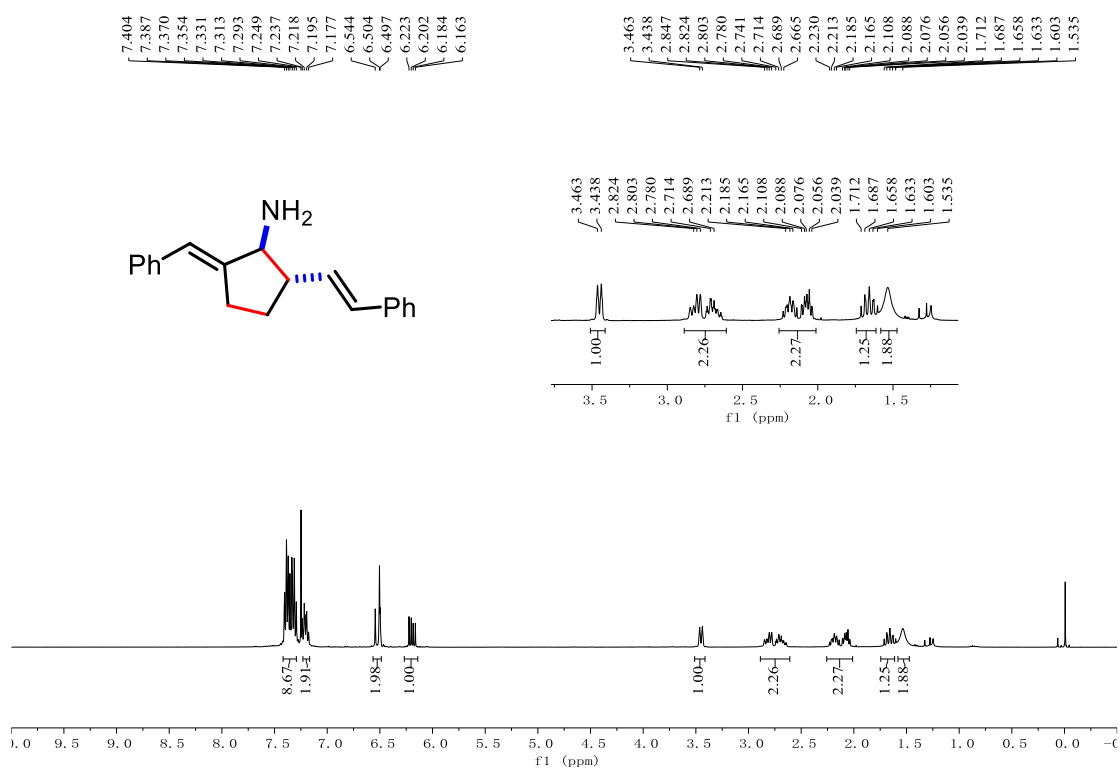

### $^{13}\text{C}$ NMR spectrum of **8aa** (101 MHz, $\text{CDCl}_3$ )

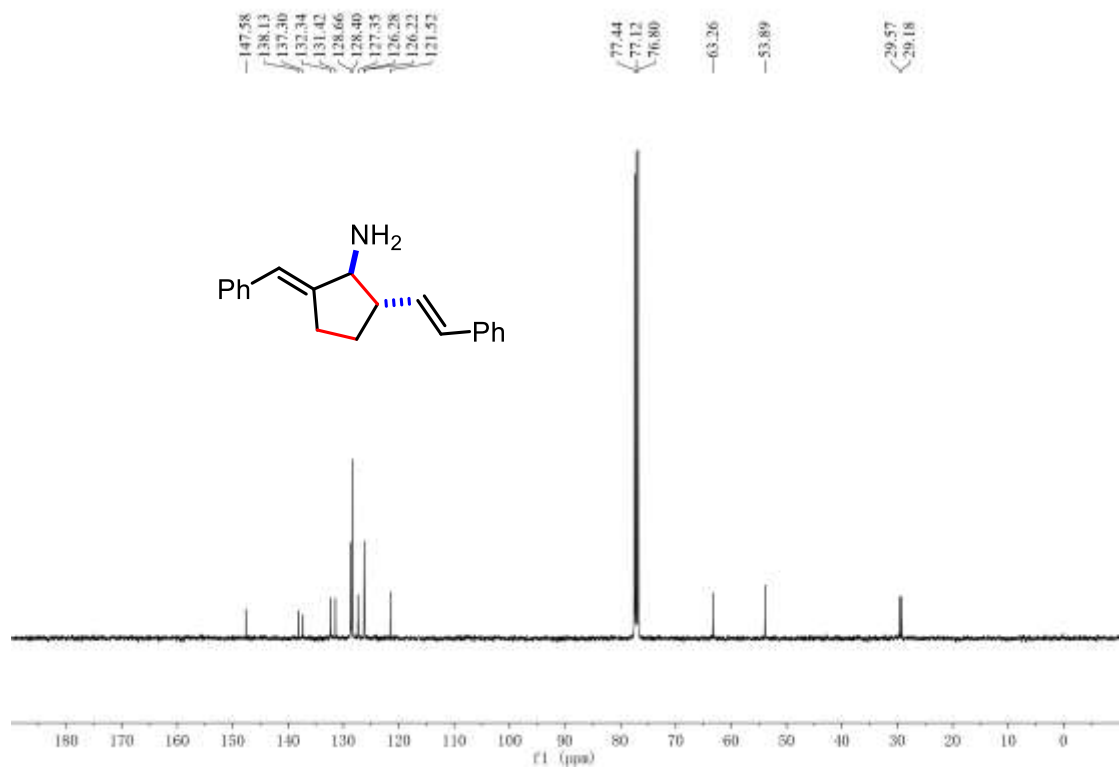

### <sup>1</sup>H NMR spectrum of 9aa (400 MHz, CDCl<sub>3</sub>)

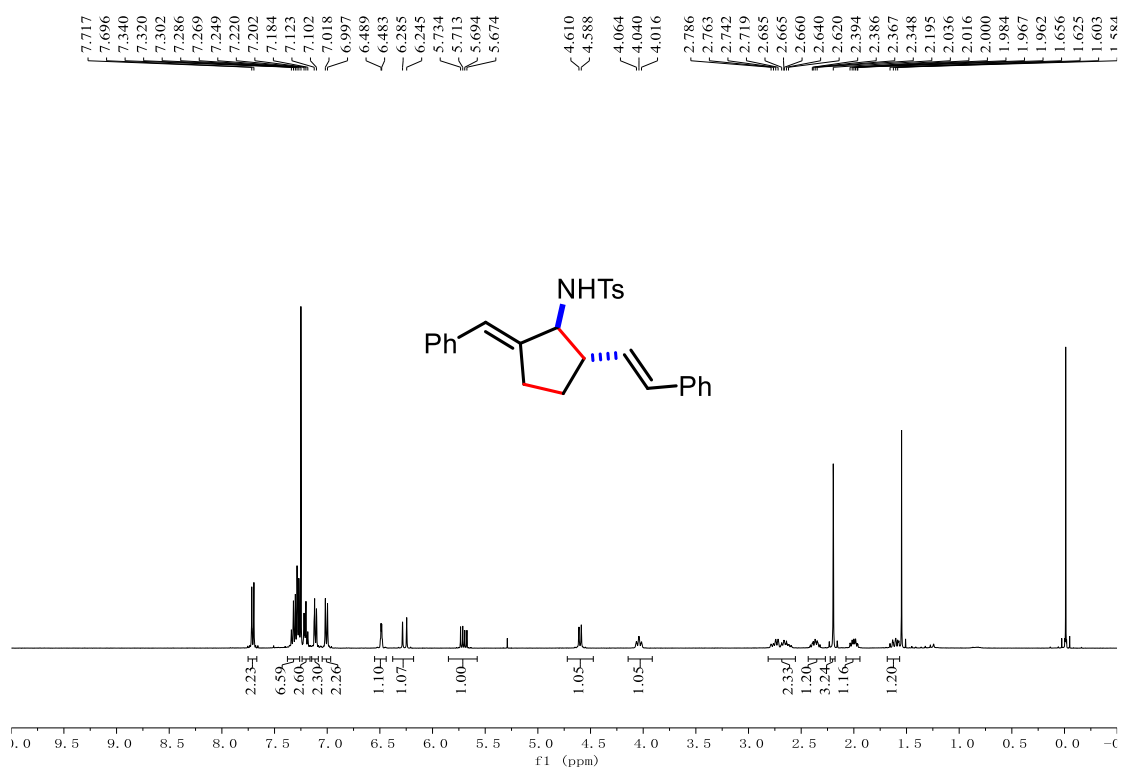

### <sup>13</sup>C NMR spectrum of 9aa (101 MHz, CDCl<sub>3</sub>)

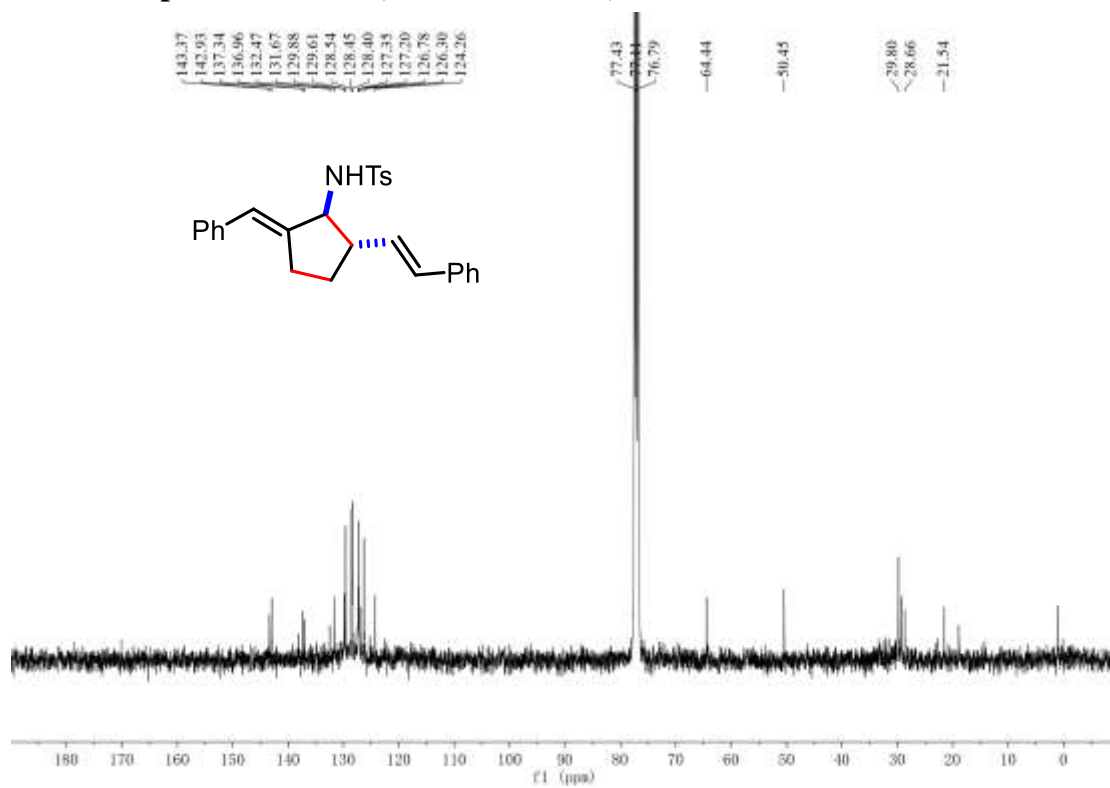

### <sup>1</sup>H NMR spectrum of 10aa (400 MHz, CDCl<sub>3</sub>)

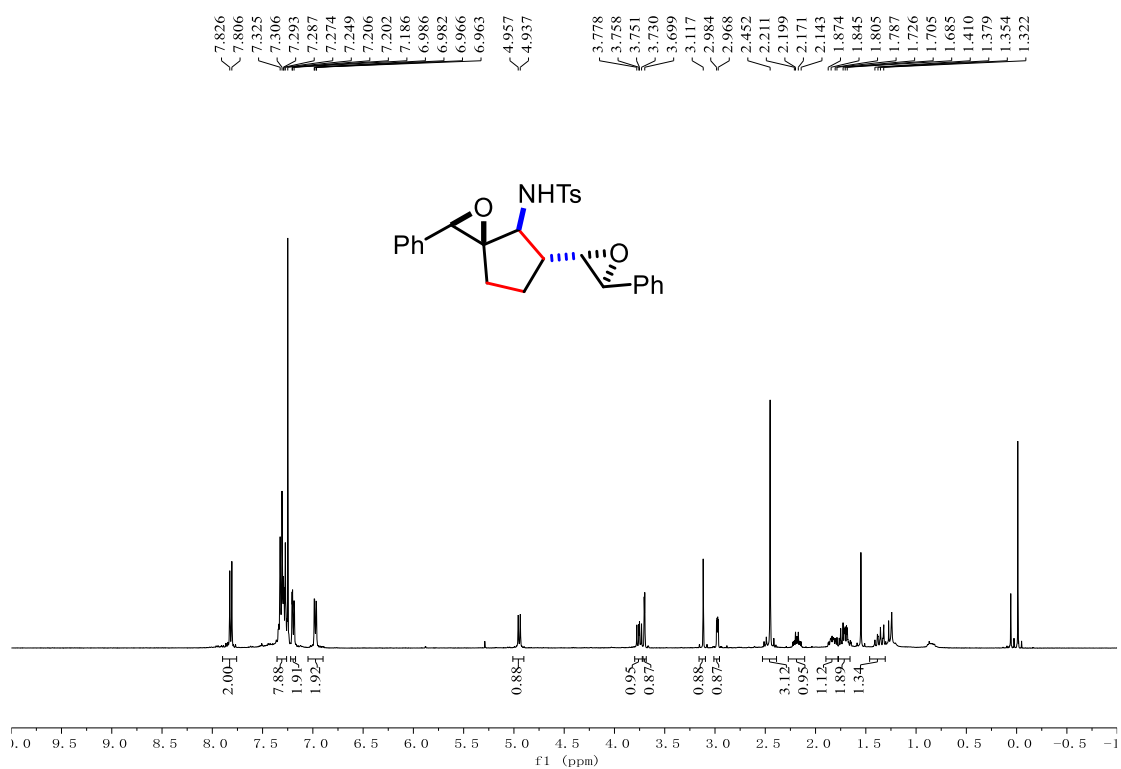

### <sup>13</sup>C NMR spectrum of 10aa (101 MHz, CDCl<sub>3</sub>)

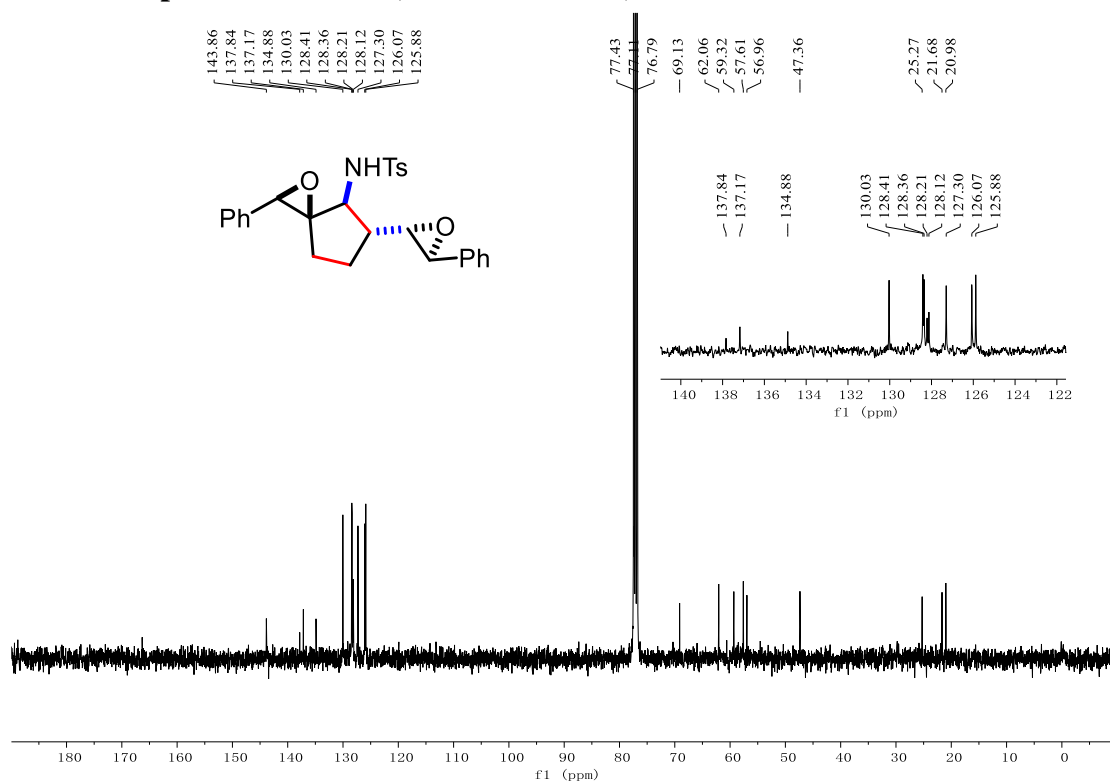

### <sup>135</sup>DEPT spectrum of 10aa

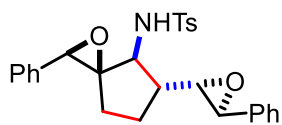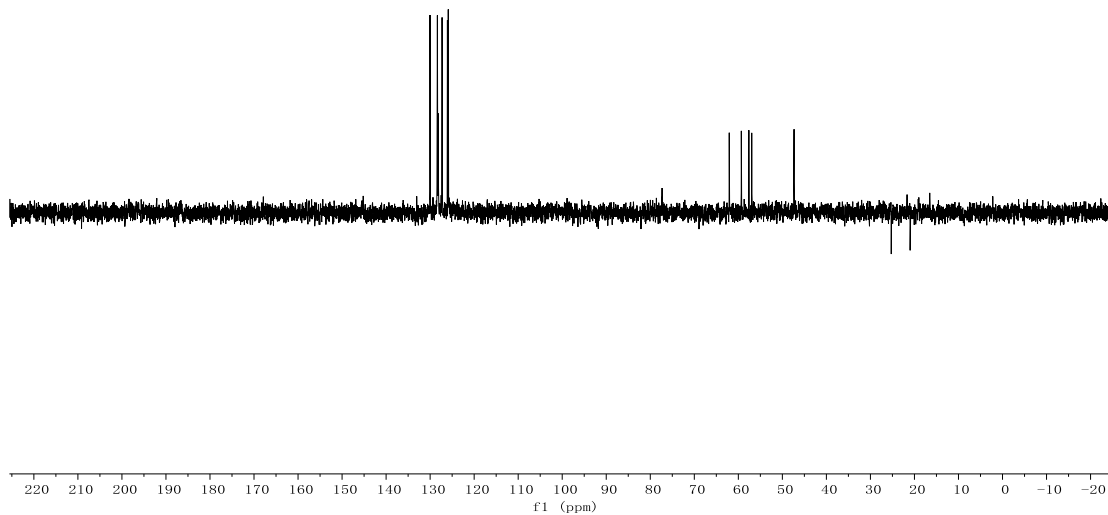

### HMBC spectrum of 10aa

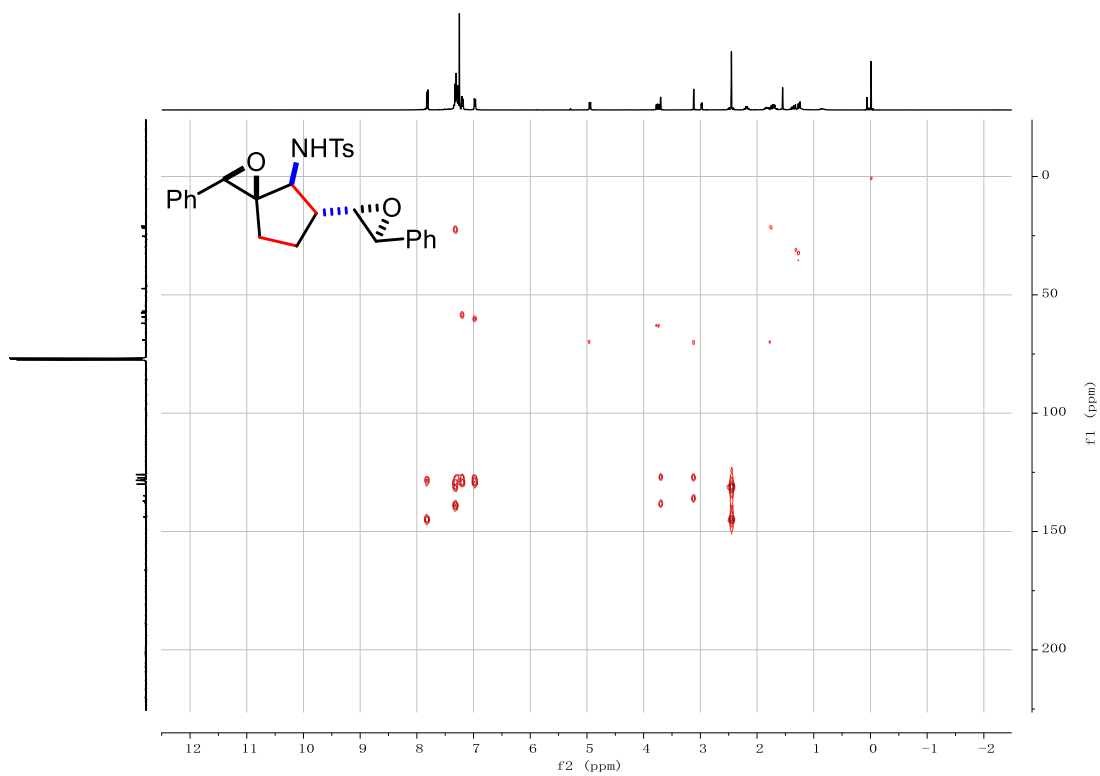

HSQC spectrum of 10aa

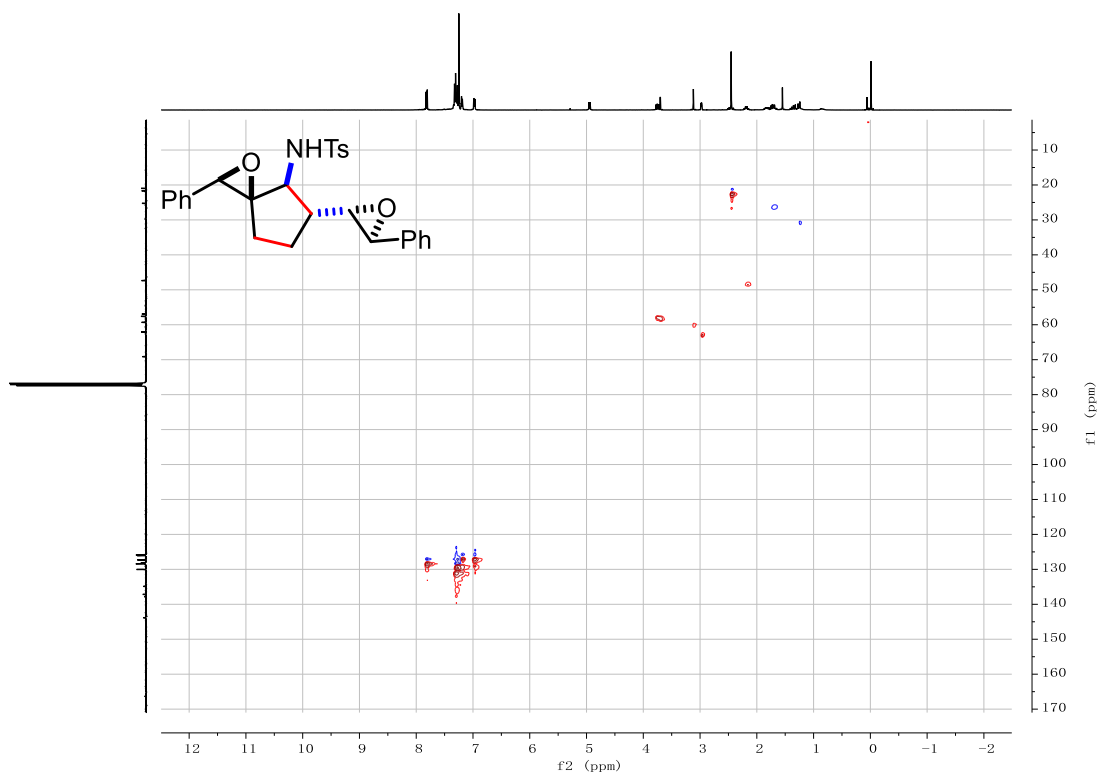

COSY spectrum of 10aa

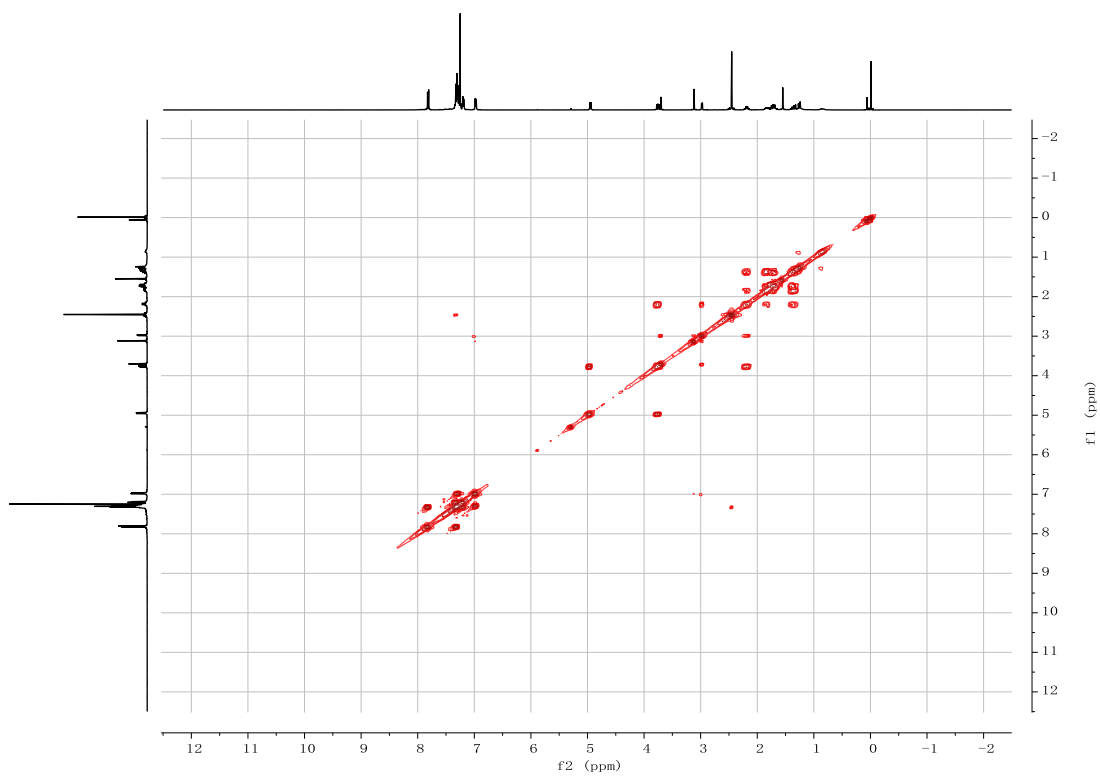

# NOE spectrum of 10aa

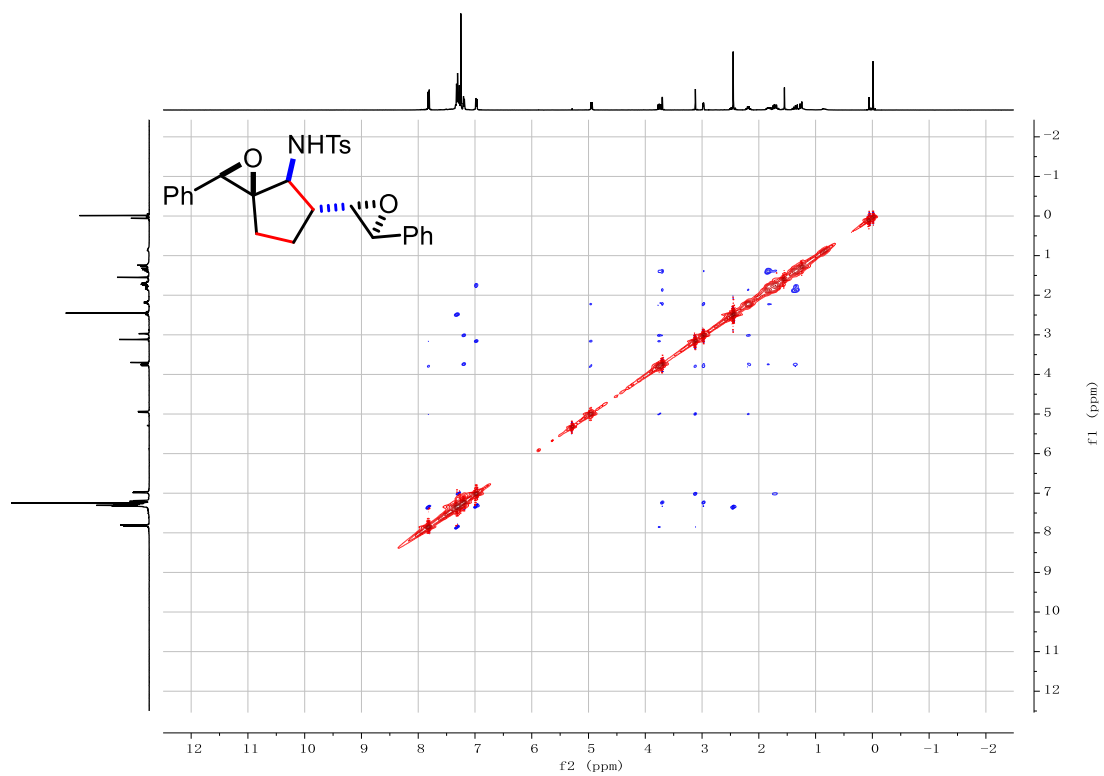

### <sup>1</sup>H NMR spectrum of 11aa (400 MHz, CDCl<sub>3</sub>)

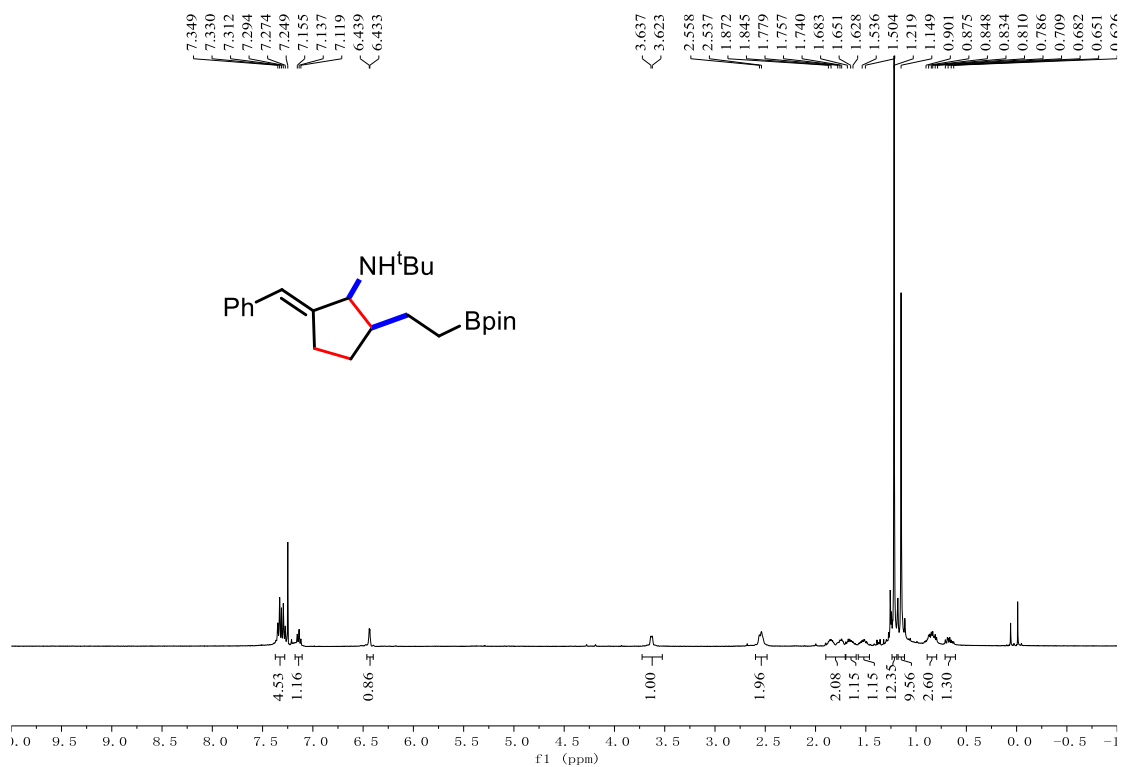

### <sup>13</sup>C NMR spectrum of 11aa (101 MHz, CDCl<sub>3</sub>)

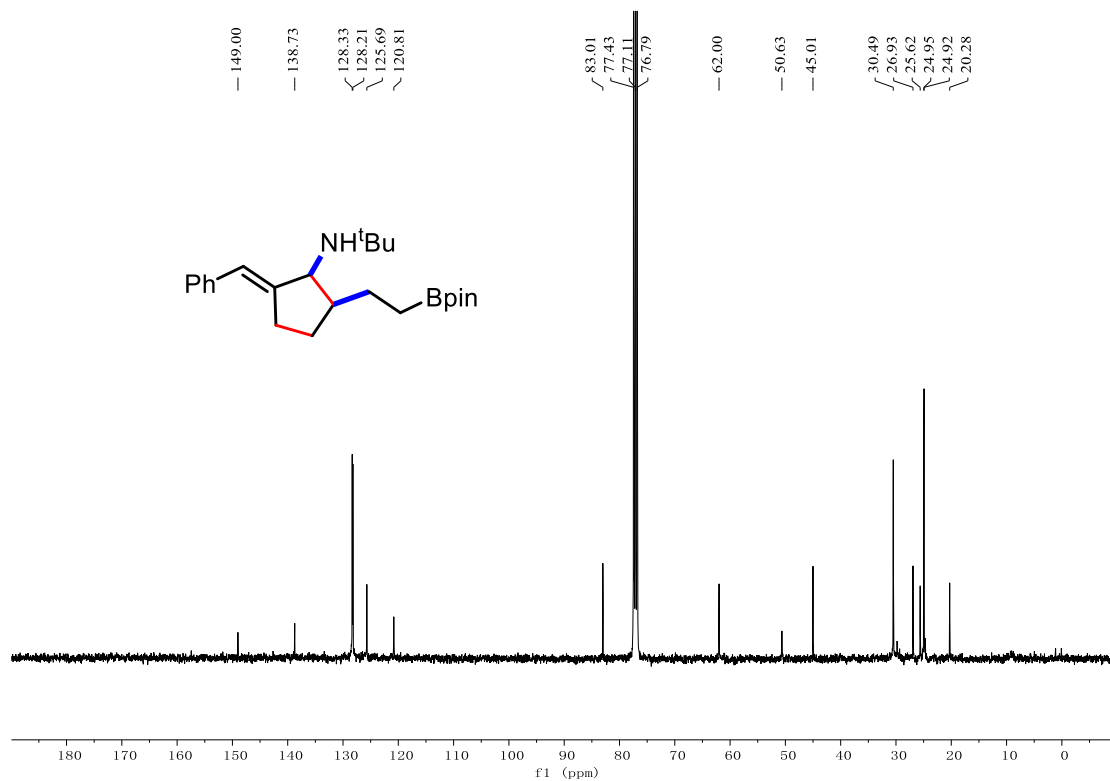

**$^{11}\text{B}$  spectrum of 11aa**

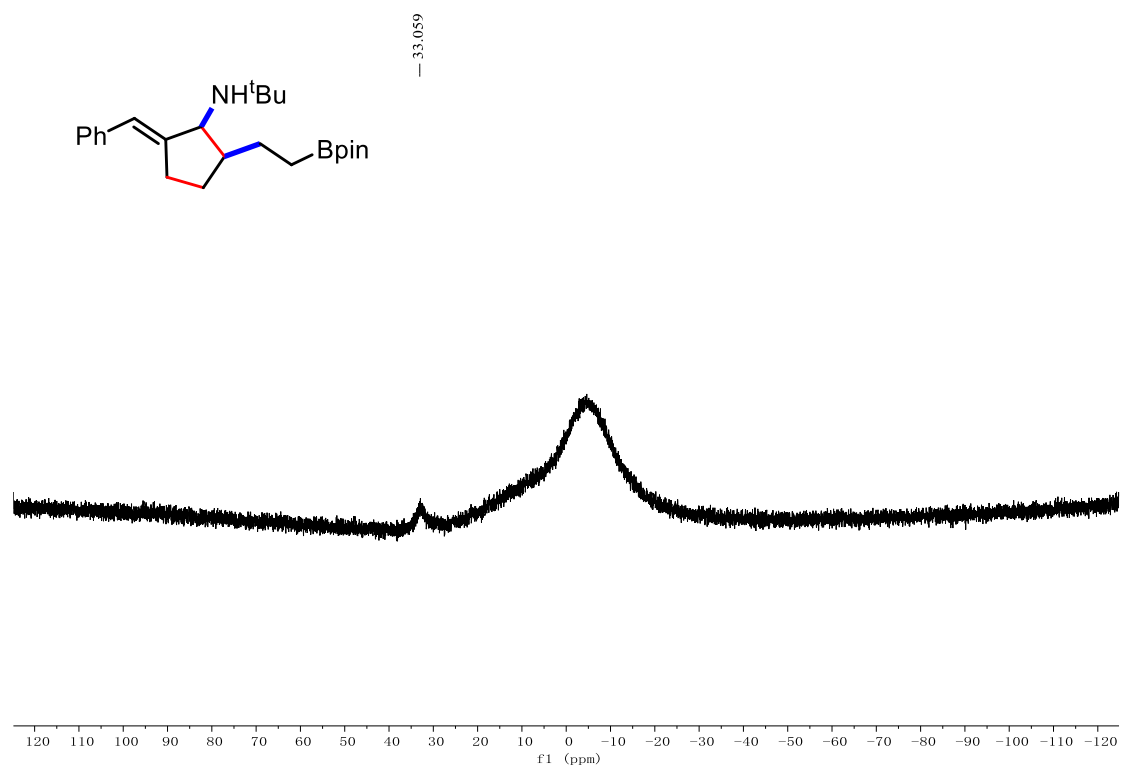

**<sup>1</sup>H NMR spectrum of 12aa (400 MHz, CDCl<sub>3</sub>)**

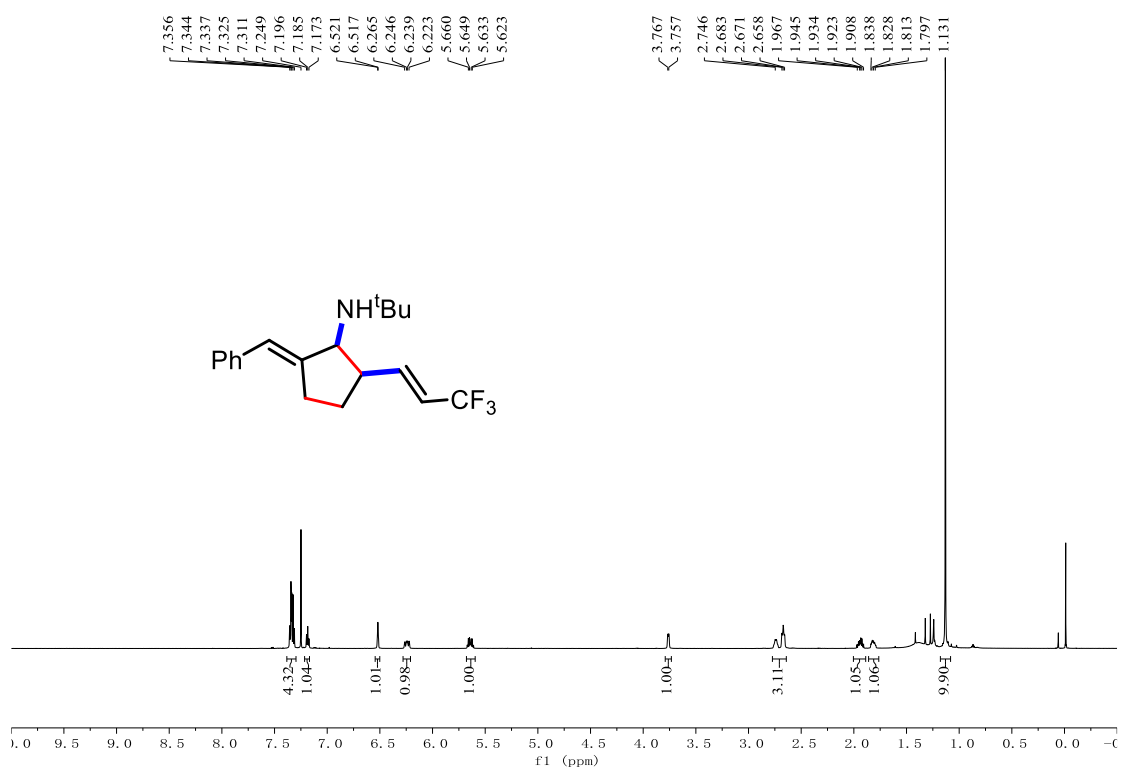

**<sup>13</sup>C NMR spectrum of 12aa (101 MHz, CDCl<sub>3</sub>)**

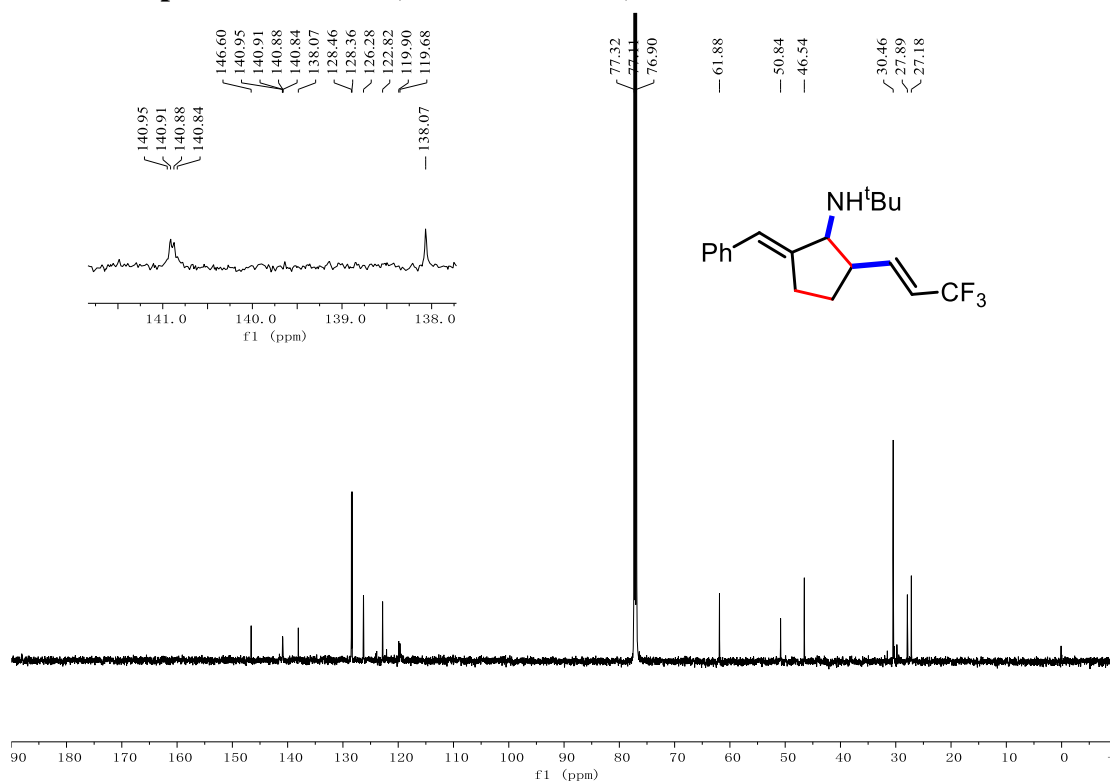

**$^{19}\text{F}$  spectrum of 12aa**

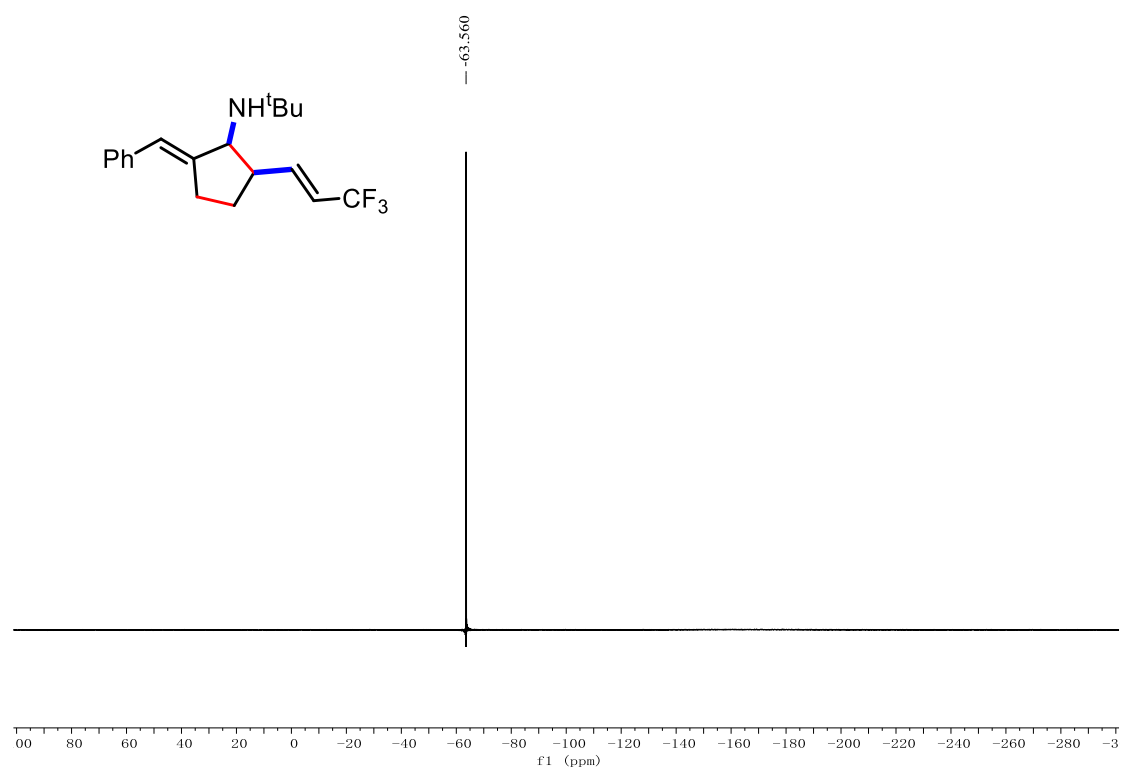

Supplement: Supplementary file 1 [file c016116986dec3710035cfba.pdf]
